# Supplementary material for: Identification and Characterization of Long Non-coding RNA in Tomato Roots Under Salt Stress
Source: Front Plant Sci. 2022 Jul 4;13:834027. doi: 10.3389/fpls.2022.834027 (PMC9295719; doi:10.3389/fpls.2022.834027)
Supplement: Supplementary Table 2 — Differentially expressed lncRNAs in M82 and Solanum Pennellii. [file Table_2.XLSX]

## Sheet: Table S2-1
lncRNA_ID	Chromosome	Strand	Start_AssambledTU	End_AssambledTU	MaxIsoformLength	M82_CK_rep1_TPM	M82_CK_rep2_TPM	M82_CK_rep3_TPM	M82_T_rep1_TPM	M82_T_rep2_TPM	M82_T_rep3_TPM	P_CK_rep1_TPM	P_CK_rep2_TPM	P_CK_rep3_TPM	P_T_rep1_TPM	P_T_rep2_TPM	P_T_rep3_TPM	MaxTPM	MinTPM	M82_CK_VS_M82_T_Foldchange	M82_CK_VS_M82_T_Pvalue
Lnc_000001	ch00	1	19766	32912	3672	0.489379	0.935851	0.602524	1.63088	1.74309	1.73743	0	0.0313153	0.0246021	0	0.0132716	0	1.74309	0	1.02213	0.00133236
Lnc_000029	ch00	1	19303659	19344719	860	0	0.635706	0.231537	0.618978	1.9499	1.029	0	0	0	0	0	0	1.9499	0	1.94841	0.0458536
Lnc_000040	ch00	-1	3298879	3348627	1102	0	0.614224	0.240922	0.672819	1.73602	1.15786	0	0	0	0	0	0	1.73602	0	1.95666	0.0303573
Lnc_000099	ch01	1	22669375	22677353	950	0	0.137019	0	0.220133	0.870155	0.368275	0	0	0	0	0	0	0.870155	0	3.37443	0.0235359
Lnc_000101	ch01	1	24232592	24237271	4680	0.542315	1.45188	0.888769	1.88083	2.25587	2.0668	0	0.0368557	0.0128688	0	0	0	2.25587	0	0.8349	0.0039181
Lnc_000103	ch01	1	27794115	27806782	2447	0.688944	1.26604	0.958404	1.58494	2.92456	2.01848	0.492719	0.199717	0.369182	0.0992422	0.109536	0.117491	2.92456	0.0992422	0.832464	0.0192619
Lnc_000112	ch01	1	36745843	36752195	3000	0.277887	0.668197	0.324495	2.51585	1.03134	2.03743	0.13749	0.0383299	0.0702636	0.0809486	0.0649779	0.0435606	2.51585	0.0383299	1.87907	2.03e-05
Lnc_000138	ch01	1	65441687	65450646	2012	0.0276229	0.194088	0.0989672	0.87876	1.9956	1.21721	0.0157696	0	0.0149667	0.051728	0	0.0259805	1.9956	0	3.4643	3.54e-08
Lnc_000140	ch01	1	68546835	68555420	1469	0.0126112	0.708881	0.256038	0.789448	1.36662	1.07874	0	0	0	0	0	0	1.36662	0	1.62887	0.0416151
Lnc_000146	ch01	1	74724789	74733679	1271	0.0145758	0.409656	0.156666	0.598315	1.41228	0.95533	0	0.022618	0.0236923	0	0	0	1.41228	0	2.22369	0.00837148
Lnc_000156	ch01	-1	5644160	5667564	7359	0.0503487	0.240561	0.120259	0.4521	0.722131	0.59008	0	0.00390643	0.00409199	0.00942852	0	0.00710324	0.722131	0	1.88587	3.39e-05
Lnc_000162	ch01	-1	11566342	11575238	4270	3.91341	7.20041	5.34723	2.82278	1.3275	2.29417	0.0148611	0.0538594	0.0352611	0	0	0	7.20041	0	-1.65107	3.64e-08
Lnc_000170	ch01	-1	32102481	32109531	1043	0	0.449287	0.148488	0.619741	1.42662	0.947118	0	0.0275623	0	0	0	0	1.42662	0	2.22988	0.0200096
Lnc_000171	ch01	-1	32260017	32260760	584	5.93206	5.97348	6.28886	1.56259	2.38611	1.83247	0.0543297	0	0.0515633	0	0	0	6.28886	0	-2.06446	7.13e-07
Lnc_000201	ch01	-1	73161257	73170709	2848	0.195145	0.594167	0.396193	1.22827	1.31859	1.25735	0.0222813	0.0201878	0.0317201	0.0243625	0.0513344	0.0275313	1.31859	0.0201878	1.42487	0.000696078
Lnc_000204	ch01	-1	76704953	76723947	7049	1.50067	2.40799	1.85497	3.83789	4.80143	4.09908	0.0180046	0.00815646	0.00854389	0	0.00691352	0.00370781	4.80143	0	0.803932	0.000244255
Lnc_000206	ch01	-1	91807676	91838836	494	0	0.105399	0.0895735	0.500301	1.09965	0.666561	0.57805	0	0.24383	0	0	0	1.09965	0	3.34743	0.0218167
Lnc_000207	ch01	-1	95620684	95622068	1038	0.107085	0.150484	0.106574	0.366309	1.13769	0.65428	0	0.027695	0	0	0	0	1.13769	0	2.18865	0.0175506
Lnc_000214	ch02	1	3864915	3866423	931	0.83575	1.03464	0.641639	1.51111	3.19649	2.34317	6.47521	14.4818	9.8328	12.595	10.6261	11.9312	14.4818	0.641639	1.09632	0.0372867
Lnc_000216	ch02	1	13578029	13579524	394	0	0	0	0	1.3188	0.313402	0	0	0	0	0	0	1.3188	0	5.30641	0.0366152
Lnc_000218	ch02	1	14488546	14495783	889	0	0.292842	0.0497743	0.213852	1.08927	0.671341	0.0356901	0	0.0338728	0	0	0	1.08927	0	2.45097	0.0478124
Lnc_000220	ch02	1	16506406	16537519	5202	0.267096	0.61556	0.395539	1.31202	1.75708	1.38071	0	0.0110525	0	0	0	0	1.75708	0	1.50659	2.37e-06
Lnc_000224	ch02	1	22663797	22687617	3356	0.982595	1.99364	1.45037	3.73318	3.85665	3.8327	0.0283628	0.00856598	0.0269186	0	0	0	3.85665	0	1.06401	3.62e-05
Lnc_000226	ch02	1	28278739	28288867	2613	0.226875	0.577862	0.321752	1.32418	1.28352	1.33893	5.31845	5.40183	5.54318	8.49714	8.54187	8.07197	8.54187	0.226875	1.53741	0.000308767
Lnc_000233	ch02	1	37039325	37048258	1584	0	0.115048	0.0139676	0.336061	0.68589	0.363789	0.400613	0	0.912514	0.197115	0.015383	0.363005	0.912514	0	3.36184	0.00366369
Lnc_000243	ch02	1	53567338	53573206	4827	0.568017	1.27822	0.889204	4.65932	5.98413	5.39763	0.00657314	0.0297777	0	0.0143742	0.055528	0.0162439	5.98413	0	2.25592	1.23e-20
Lnc_000248	ch02	-1	17965927	17973990	1968	0.00941351	0.60851	0.224844	0.560297	1.33214	0.962077	0	0	0	0	0	0	1.33214	0	1.65654	0.0357685
Lnc_000249	ch02	-1	20765868	20769421	3545	0.0627107	0.396564	0.156027	0.504112	0.866122	0.505068	2.38076	1.86514	2.07265	3.2001	2.95562	3.05232	3.2001	0.0627107	1.42471	0.0147163
Lnc_000254	ch02	-1	32730803	32732251	1447	1.48514	2.28492	1.63603	0.670065	0.897731	0.8818	0	0	0	0	0	0	2.28492	0	-1.49115	0.000426759
Lnc_000258	ch02	-1	39342926	39344979	1926	0.259707	0.594746	0.551394	0.868644	1.37345	1.18608	0	0.0597039	0	0	0.0126515	0.0135703	1.37345	0	0.982226	0.0450414
Lnc_000259	ch02	-1	39450878	39453703	594	0	0.175311	0.0744938	0.160029	1.15309	0.692932	0	0	0	0	0	0	1.15309	0	2.8589	0.0471772
Lnc_000263	ch02	-1	47404765	47410470	5706	0.40584	0.798439	0.523454	3.31518	3.73773	3.33263	0.633903	0.785945	0.670232	1.66591	1.96437	1.90549	3.73773	0.40584	2.27857	1.34e-19
Lnc_000264	ch02	-1	48109887	48115933	5871	3.53729	5.80891	4.62768	9.54621	8.8343	9.62227	1.56724	2.01247	1.76954	1.34136	1.58543	1.46018	9.62227	1.34136	0.673005	0.00102209
Lnc_000266	ch02	-1	53566893	53570340	3126	0.0948217	0.291484	0.184018	1.00348	2.99198	1.5998	0.0507494	0.0183925	0.0192661	0.0443919	0.202666	0.0418048	2.99198	0.0183925	3.0127	1.97e-10
Lnc_000269	ch03	1	240505	249696	1344	0	0.135592	0.0164618	0.254618	0.667785	0.398127	3.25784	0.278063	2.12852	0.413003	0.52577	0.369487	3.25784	0	3.05479	0.0138388
Lnc_000278	ch03	1	21553990	21563500	2340	0.007917	0.389392	0.160735	0.438726	0.787283	0.650823	0	0	0	0	0	0	0.787283	0	1.63931	0.0421359
Lnc_000288	ch03	1	37461174	37465018	3366	5.59186	7.16196	6.06686	2.74497	2.46289	2.78192	0	0.00854053	0.00894621	0	0	0	7.16196	0	-1.60097	1.23e-10
Lnc_000289	ch03	1	38745656	38749548	2125	0.00871802	0.465543	0.166586	0.465221	1.18926	0.697302	0	0	0	0	0	0	1.18926	0	1.7686	0.0286424
Lnc_000296	ch03	1	58022453	58023631	874	0.127179	0.268081	0.227828	0.870089	0.86475	0.894786	0	0	0	0	0	0	0.894786	0	1.77659	0.0315084
Lnc_000304	ch03	-1	6004946	6021704	1345	0.399441	0.464541	0.39479	1.95062	1.8965	1.69843	0	0	0	0	0	0	1.95062	0	1.764	0.000415902
Lnc_000307	ch03	-1	8849344	8850260	917	0.0202026	0.425851	0.241272	1.40979	3.68314	2.53604	0	0	0	0	0	0	3.68314	0	3.29954	3.34e-06
Lnc_000309	ch03	-1	10201864	10202753	890	0.0208155	0.146257	0.0994367	0.619474	0.583828	0.531845	0.03565	0	0	0	0	0	0.619474	0	2.50466	0.0236588
Lnc_000312	ch03	-1	12776763	12785978	3255	0.313032	0.639844	0.414625	1.17398	1.51652	1.29613	0.0292429	0.00883178	0.0277539	0	0	0	1.51652	0	1.23587	0.000920468
Lnc_000318	ch03	-1	22848940	22857286	1545	0	0.387556	0.214803	0.479901	1.11595	0.692663	1.88934	0.0558203	1.30587	0	0.047314	0.0507502	1.88934	0	1.79671	0.0490149
Lnc_000330	ch03	-1	56594681	56604445	1383	0	0.0188241	0	0.453636	0.648953	0.580349	0	0	0	0	0	0	0.648953	0	6.25095	3.67e-05
Lnc_000334	ch03	-1	71389518	71393687	4170	0.15105	0.299668	0.217533	9.19115	10.5462	9.71755	0.266307	0.330906	0.245525	9.25958	9.52464	9.56453	10.5462	0.15105	5.15124	1.03e-88
Lnc_000335	ch04	1	4787795	4790765	2971	1.12863	1.86643	1.53406	3.18031	4.18153	3.41501	0.160191	0.14514	0.131763	0.11677	0.188635	0.175943	4.18153	0.11677	0.913762	0.000766897
Lnc_000347	ch04	1	38494623	38495909	1223	0	0.106434	0.036181	0.264264	0.444174	0.269241	0	0	0	0	0	0	0.444174	0	2.6736	0.0476046
Lnc_000350	ch04	1	53437774	53438995	1107	0	0.164621	0.0999307	0.394999	0.789417	0.632089	0.114647	0	0.108809	0	0	0	0.789417	0	2.63138	0.0157914
Lnc_000354	ch04	1	56099449	56105672	4467	0.016589	0.227292	0.128776	0.880988	2.01447	1.29461	0.0284115	0.012871	0.0134824	0.178626	0.0709128	0.146275	2.01447	0.012871	3.31732	5.27e-10
Lnc_000359	ch04	1	59692236	59694494	1915	1.01577	1.59057	1.09757	2.23372	13.2091	6.44807	0.132547	0.270211	0.125798	1.06885	0.827069	1.07821	13.2091	0.125798	2.18714	1.21e-06
Lnc_000361	ch04	1	61711480	61715045	1774	0.929422	0.895182	0.960315	0.396519	0.292901	0.255221	0	0	0	0	0	0	0.960315	0	-1.95301	0.000436911
Lnc_000363	ch04	1	66397834	66398451	430	2.02491	0.605434	1.08051	0.442127	0.32956	0.430746	0.0737873	0	0.0700301	0	0.0566668	0.0607823	2.02491	0	-2.17383	0.0215185
Lnc_000364	ch04	-1	2672533	2677232	3453	1.14277	1.8547	1.39681	4.61384	2.9754	3.9396	0.339981	0.391291	0.383716	0.140658	0.12702	0.128676	4.61384	0.12702	1.06936	0.000242361
Lnc_000367	ch04	-1	10768581	10770717	524	0	0	0	0.0725628	1.08176	0.510575	0	0	0	0	0	0	1.08176	0	5.75909	0.00595498
Lnc_000369	ch04	-1	12210530	12263419	741	0	0.210799	0.0895735	0.487473	0.892467	0.749881	0	0	0	0	0	0	0.892467	0	2.70498	0.0247513
Lnc_000370	ch04	-1	14463845	14467318	879	0	0.118469	0.0503405	0.259542	0.779222	0.398022	0	0	0	0	0	0	0.779222	0	2.95196	0.0305445
Lnc_000372	ch04	-1	23176521	23184872	771	0	0.135064	0	0.147949	1.22534	0.533854	0	0	0	0	0	0	1.22534	0	3.76387	0.0139273
Lnc_000376	ch04	-1	27649567	27732457	17200	0.316662	0.709871	0.45407	5.98419	1.49263	4.3625	0.00922341	0.0200564	0.014006	0	0	0	5.98419	0	2.7388	3.39e-13
Lnc_000386	ch04	-1	44380368	44505354	331	0	0.235955	0	0.459491	1.4271	0.808281	0.0958566	0	0.0909757	0	0	0	1.4271	0	3.4725	0.0475479
Lnc_000397	ch04	-1	62577957	62579966	1265	0.219673	0.452759	0.174899	0.856643	1.32562	0.829711	1.73065	1.20444	1.40448	0.658193	0.365982	0.661157	1.73065	0.174899	1.52246	0.0227378
Lnc_000419	ch05	1	25796952	25797519	548	0.0338062	0	0	0	1.16368	0.675988	0	0	0	0	0	0	1.16368	0	5.00235	0.0175988
Lnc_000423	ch05	1	27702538	27713589	2918	0.84439	0.990314	1.05392	0.475612	0.291386	0.366746	0	0	0	0	0	0	1.05392	0	-1.71083	0.000123585
Lnc_000424	ch05	1	27949349	27951493	861	0.989763	0.846623	0.899377	0.220807	0.38404	0.406343	0	0	0	0	0	0	0.989763	0	-1.87347	0.0119456
Lnc_000426	ch05	1	29188538	29197005	1159	0	0.0224622	0.0190894	0.0656133	0.550215	0.159811	0.0273758	0	0.0259818	0	0	0	0.550215	0	3.99614	0.0276392
Lnc_000431	ch05	1	31457460	31458448	969	0	0.161199	0	0.313915	0.560604	0.446008	0	0	0	0	0	0	0.560604	0	3.02156	0.0403316
Lnc_000440	ch05	1	46902636	46970402	734	0	0.0709364	0	0.414419	1.54453	0.64488	0	0	0	0	0	0	1.54453	0	5.11251	0.00078385
Lnc_000442	ch05	1	49418643	49430161	1169	2.15527	5.54524	3.59597	7.38341	8.36446	7.6053	0.271416	0.0737744	0.206077	0	0.0208441	0.0223579	8.36446	0	0.772931	0.00740085
Lnc_000454	ch05	1	60773267	60776121	2781	0.712786	1.34802	0.970589	0.355482	0.220813	0.31081	0.0684542	0.0206742	0.0216562	0.0498989	0.0175237	0.0187964	1.34802	0.0175237	-2.07112	3.82e-06
Lnc_000457	ch05	1	64106335	64107086	676	0	0.0385113	0	0.0562469	0.698772	0.334883	0	0	0	0	0	0	0.698772	0	4.55453	0.029176
Lnc_000459	ch05	1	64640636	64642244	1495	0	0.174138	0.0443973	1.0682	1.04269	0.88102	0	0	0	0	0	0	1.0682	0	3.69442	1.79e-05
Lnc_000460	ch05	1	66064988	66073243	1478	0.4011	0.59888	0.538896	1.65932	1.70986	1.64306	0	0	0	0	0	0	1.70986	0	1.36038	0.00373594
Lnc_000462	ch05	-1	2563075	2564831	1589	0.816114	2.12988	1.64299	4.03201	2.69034	3.6912	0.359417	0.70557	0.397969	1.37546	2.11618	1.79287	4.03201	0.359417	0.918236	0.011795
Lnc_000464	ch05	-1	12573561	12574502	880	0	0.0887511	0.0251417	0.194435	0.858854	0.514502	0	0	0	0	0	0	0.858854	0	3.65408	0.010419
Lnc_000466	ch05	-1	15253953	15262821	4370	0.0211966	0.351484	0.14176	0.461147	1.71329	0.885367	0.0508237	0	0.0206725	0	0.0223036	0.0239235	1.71329	0	2.42456	0.000104741
Lnc_000481	ch05	-1	30212706	30214469	1763	5.76895	9.22918	6.93984	14.2882	18.5277	15.8991	6.35291	7.41922	7.24214	10.39	10.2277	10.0661	18.5277	5.76895	0.809223	0.000279594
Lnc_000482	ch05	-1	38742959	38745620	766	0	0	0	0.248191	0.986673	0.752275	0	0	0	0	0	0	0.986673	0	6.57892	0.00014363
Lnc_000498	ch06	1	38667	40840	1830	0.0303701	0.569042	0.15717	2.47253	1.89722	1.92306	4.87198	3.66019	4.4429	2.4076	2.25026	2.52794	4.87198	0.0303701	2.96441	1.15e-06
Lnc_000518	ch06	1	32892349	32894436	2088	0.10647	0.0748094	0.0423844	1.32935	2.17182	1.84314	0.0151957	0	0.0144219	0	0	0	2.17182	0	4.12091	1e-12
Lnc_000519	ch06	1	33099342	33102647	3037	0.0305001	0.171443	0.0509953	0.325517	0.373292	0.216846	0.42834	0.407027	0.287546	0.628276	0.152442	0.283997	0.628276	0.0305001	1.68168	0.0383125
Lnc_000520	ch06	1	33781264	33788483	1487	0	0.0175075	0	0.0511404	0.254133	0.1384	0	0	0	0	0	0	0.254133	0	4.40563	0.0359836
Lnc_000530	ch06	-1	1934201	1940394	5566	0.352809	0.453695	0.433271	1.19547	0.818967	0.983525	0.0456034	0	0.0270508	0	0.00437778	0.00469572	1.19547	0	0.920444	0.0101083
Lnc_000531	ch06	-1	3444424	3450394	807	0	0.0322598	0.0274159	0.824536	0.614608	0.510039	0	0	0	0	0	0	0.824536	0	4.84728	0.00126143
Lnc_000547	ch06	-1	25844757	25852614	1887	0.0196352	0.731205	0.24622	0.675023	1.30171	1.00337	0.840714	0	0.398953	0.0183849	0	0.0138508	1.30171	0	1.47997	0.0492447
Lnc_000551	ch06	-1	35061524	35066912	1108	0	0.0469922	0	0.257375	0.873969	0.612945	0	0	0	0	0	0	0.873969	0	5.13096	0.000667156
Lnc_000552	ch06	-1	35558728	35568372	3557	0.281246	1.36133	0.684204	2.04171	1.81936	1.88617	0.347881	0.0484916	0.169317	0.0780258	0.095905	0.0440872	2.04171	0.0440872	1.10926	0.0040699
Lnc_000557	ch07	1	2569635	2571532	1072	2.86873	3.22992	2.84814	0.42563	1.38803	0.921496	0.059195	0	0.0280904	0	0	0	3.22992	0	-2.12584	9.56e-06
Lnc_000563	ch07	1	5040746	5046910	5951	1.01174	1.63613	1.2938	2.76658	2.68293	2.44845	0	0.00483069	0	0	0	0	2.76658	0	0.670785	0.00618773
Lnc_000567	ch07	1	10522686	10530354	715	0.0259102	0.291286	0	0.452021	0.891887	0.77715	0	0.0402062	0.042116	0	0	0	0.891887	0	2.6525	0.0392435
Lnc_000570	ch07	1	16812647	16815800	1150	0	0.022638	0.0192388	0.413293	0.431294	0.357914	0.965651	0.249978	0.602259	2.2022	1.44081	1.93182	2.2022	0	4.6528	0.00258778
Lnc_000578	ch07	1	29403747	29406035	2171	0	0.22784	0.122292	0.271467	0.739778	0.426579	0	0.0132416	0.0138705	0	0	0	0.739778	0	1.90618	0.0451796
Lnc_000590	ch07	1	49629543	49637728	1132	3.92773	3.97864	4.04576	8.86753	17.1714	11.5808	0.308316	0.0507905	0.212812	0.0919406	0.193728	0.0923547	17.1714	0.0507905	1.2397	0.000118189
Lnc_000594	ch07	1	54724676	54727458	1533	0.217524	0.305679	0.288645	1.28975	1.58689	1.32905	3.33222	7.33219	4.85186	3.46244	3.21075	3.46098	7.33219	0.217524	2.01856	0.000165903
Lnc_000603	ch07	-1	746472	751307	4317	0.0429136	0.211067	0.0973752	1.29914	1.81091	1.38726	0.0955457	0.179796	0.0697544	0.305375	0.372528	0.266389	1.81091	0.0429136	3.46334	1.7e-15
Lnc_000605	ch07	-1	1501933	1504773	2806	0.0066022	0.120612	0.0394239	0.210034	0.841714	0.528071	0.0113074	0	0.0107316	0	0	0	0.841714	0	3.0953	0.000288467
Lnc_000607	ch07	-1	3306386	3308778	2393	0.402566	0.59835	0.591717	6.28419	7.95508	7.3703	0.769016	1.0091	0.893447	3.11694	3.38059	3.53873	7.95508	0.402566	3.41416	3.66e-33
Lnc_000611	ch07	-1	6722580	6724800	1766	3.09462	4.68783	3.62063	7.29885	9.24144	8.50706	0.0359327	0.0651131	0.034103	0.0785781	0.262156	0.192397	9.24144	0.034103	0.786383	0.00172081
Lnc_000612	ch07	-1	7598007	7601906	2053	2.66201	3.51258	3.15759	1.11124	1.77167	1.48361	0.0154547	0.0140026	0.0146678	0	0	0	3.51258	0	-1.46995	4.85e-06
Lnc_000617	ch07	-1	15406369	15414854	1056	0	0.246531	0.14666	0.378069	0.961738	0.662616	0.0901379	0.0272229	0.114064	0.0985575	0.207671	0.148502	0.961738	0	2.20323	0.0389335
Lnc_000634	ch07	-1	30199645	30202117	1604	0.0115497	0.178535	0	0.521511	1.29578	0.80832	0.0395618	0	0	0	0	0	1.29578	0	3.70499	0.00012492
Lnc_000635	ch07	-1	30458551	30477704	3425	0.670715	0.7069	0.775171	1.60973	2.39978	1.85671	0.0185276	0.00839341	0.0175842	0	0	0	2.39978	0	1.04679	0.00248898
Lnc_000644	ch07	-1	48272775	48281634	2307	0.00803025	0.417532	0.172624	0.486205	1.30019	0.811785	0.0275063	0.012461	0.0261057	0	0	0	1.30019	0	1.99952	0.00973085
Lnc_000645	ch07	-1	48436493	48443751	644	0	0	0	0.32473	0.440096	0.47935	0	0	0	0	0	0	0.47935	0	5.67505	0.00518887
Lnc_000648	ch07	-1	50517568	50526847	1854	0.00999233	0.238712	0.0716009	0.317883	1.15927	0.61052	0	0	0	0	0	0	1.15927	0	2.5746	0.00336805
Lnc_000650	ch07	-1	56095155	56098279	2875	0.547719	1.77482	0.961942	10.7059	13.7439	11.575	0.353152	0.479957	0.523704	0.19307	0.254261	0.227273	13.7439	0.19307	3.20616	1.91e-32
Lnc_000656	ch07	-1	61947284	61949654	2181	0.81544	0.620702	0.750676	0.156903	0.303218	0.349135	0.0581908	0.474511	0.138069	0.0477197	0.0446891	0.0479347	0.81544	0.0446891	-1.88806	0.00121477
Lnc_000675	ch08	1	31014042	31020847	1799	0.339828	1.41818	0.811689	1.55347	2.79641	1.88756	0.0176368	0.0319593	0.0502162	0	0	0	2.79641	0	1.04645	0.0192633
Lnc_000680	ch08	1	47253668	47312709	4719	3.16811	4.84925	3.97109	11.9733	3.54853	9.00133	0.0336179	0.0487348	0.0255249	0	0	0	11.9733	0	0.715796	0.0434947
Lnc_000681	ch08	1	48257275	48265338	2180	0.0169961	0.358261	0.213128	0.392438	1.10509	0.585305	0.116435	0	0.0276266	0	0	0	1.10509	0	1.66009	0.0329173
Lnc_000684	ch08	1	50849154	50864061	12970	0.201398	0.537935	0.370166	1.49072	2.17246	1.80413	0.0269093	0.00221646	0.0208957	0	0	0	2.17246	0	2.02272	1.67e-14
Lnc_000689	ch08	1	58462004	58469147	1170	0	0	0	0.0974946	0.585416	0.175898	1.49151	0.122852	1.10672	0.20756	0.249915	0.35742	1.49151	0	5.96873	0.00240244
Lnc_000693	ch08	1	62131287	62132539	1120	0.0330818	0.069733	0.0790167	0.611082	1.09657	0.735003	0.226632	0.102669	0.107546	0.743405	0.500388	0.746754	1.09657	0.0330818	3.42641	0.000257279
Lnc_000701	ch08	-1	8225528	8247584	741	0	0	0	0.179595	0.637476	0.444374	4.79568	4.03473	4.71404	5.29045	7.26727	6.70163	7.26727	0	5.87678	0.0028225
Lnc_000713	ch08	-1	42602215	42608277	2590	0.615142	1.14588	0.785895	2.70124	1.0487	2.1772	0	0	0	0	0	0	2.70124	0	0.92561	0.0274951
Lnc_000720	ch08	-1	54424214	54431709	1012	0.109837	0.463049	0.28421	0.657511	1.30695	1.05747	0	0	0	0	0	0	1.30695	0	1.57656	0.03556
Lnc_000726	ch08	-1	64903537	64904670	1120	1.55484	2.6731	1.69886	5.97503	4.1965	5.64115	0.0849871	0.0256674	0	0.247802	0.043512	0.140016	5.97503	0	1.09939	0.00172621
Lnc_000727	ch08	-1	65186031	65191832	2063	0.197561	0.492154	0.278837	0.608219	1.33949	0.80804	0.0153798	0.0139348	0.0145967	0	0	0	1.33949	0	1.21368	0.0289719
Lnc_000728	ch09	1	2518415	2522838	2112	0	0.0493062	0.0209514	0.0630115	0.391405	0.185143	0	0	0	0	0	0	0.391405	0	3.03732	0.0279487
Lnc_000730	ch09	1	12915588	12917858	1505	0.0984759	0.207577	0.264614	0.972679	0.721894	1.08028	0	0.0191013	0	0	0	0	1.08028	0	1.98212	0.00308695
Lnc_000739	ch09	1	31509717	31510431	715	0.855036	2.58516	1.73284	0.398842	0.0330329	0.201483	0.0443756	0	0.042116	0	0	0	2.58516	0	-3.2278	6.97e-05
Lnc_000742	ch09	1	50165435	50170854	5416	2.5278	4.70586	3.54174	1.88851	0.963753	1.62634	0.0058583	0.0106157	0.01112	0	0	0	4.70586	0	-1.56523	1.1e-07
Lnc_000749	ch09	1	62735386	62738462	2422	0	0.0859906	0.0548092	0.706454	2.14536	1.28307	0.0131001	0.0118693	0.0248662	0.071619	0.110666	0.118704	2.14536	0	4.69433	3.54e-11
Lnc_000750	ch09	1	64579652	64589870	1064	0.0348229	0.0489355	0.0415877	0.285887	0.554946	0.425528	1.25244	1.56706	1.35848	1.23901	1.16795	1.3756	1.56706	0.0348229	2.97199	0.0152167
Lnc_000758	ch09	-1	1299626	1304035	3993	27.1832	28.0157	27.9592	6.63235	3.8329	5.70037	0.254273	0.0359973	0.128204	0	0.0244094	0	28.0157	0	-2.74836	1.05e-22
Lnc_000759	ch09	-1	2519360	2522978	1806	0.0718054	0.100906	0.0490026	0.684244	0.902368	0.649537	0	0	0	0	0	0	0.902368	0	2.97717	6.16e-05
Lnc_000764	ch09	-1	6981983	6984702	2083	0.862699	1.3748	1.05153	3.28571	4.14996	3.90261	0	0.013801	0	0.166549	0.105281	0.163117	4.14996	0	1.44434	2.68e-06
Lnc_000770	ch09	-1	15607032	15615731	5248	0.402428	0.818513	0.577568	2.25326	1.98921	2.11762	0	0	0	0	0	0	2.25326	0	1.52317	6.98e-08
Lnc_000784	ch09	-1	44195586	44204221	2649	0	0.353798	0.100225	0.236836	1.43548	0.675903	0	0	0	0	0	0	1.43548	0	2.27781	0.0106179
Lnc_000841	ch10	1	62602391	62604373	407	6.05388	7.9956	5.7622	2.00858	0.232123	1.06187	0.467743	2.26024	1.55374	0	0.359214	0.256869	7.9956	0	-2.90209	2.46e-06
Lnc_000867	ch10	-1	33920947	33924674	2105	0.387237	0.457599	0.472974	1.8876	1.35764	1.73049	0.587845	0.273135	0.443469	0.576831	0.9029	0.881559	1.8876	0.273135	1.55215	0.000400415
Lnc_000879	ch10	-1	49447329	49451501	820	0.0903697	0.920703	0.485663	0.0231847	0.0864091	0.0250977	0	0.245405	0	0	0	0	0.920703	0	-3.67177	0.0066413
Lnc_000880	ch10	-1	49740254	49746925	2768	0.180707	1.04398	0.535532	2.3833	2.46595	2.55021	0.0573131	0	0.0543948	0	0.008803	0.00944233	2.55021	0	1.88348	5.18e-06
Lnc_000881	ch10	-1	49847150	49849212	866	1.4119	1.32273	1.50734	0.131719	0.163638	0.142587	0	0	0	0	0	0	1.50734	0	-3.68967	2.69e-07
Lnc_000902	ch11	1	11127418	11382145	1222	0	0.213041	0.0543159	0.326711	0.792437	0.555763	0	0	0	0	0	0	0.792437	0	2.55998	0.0219227
Lnc_000904	ch11	1	11861526	11864498	802	0.138597	0.129844	0.193108	0.474101	2.20871	1.15474	0	0	0	0	0	0	2.20871	0	2.62833	0.00297245
Lnc_000911	ch11	1	20102713	20112229	4006	0.258973	0.519893	0.342419	0.934912	1.76284	1.3357	0.174246	0.0071761	0.0826866	0	0.0608255	0.0391458	1.76284	0	1.52711	5.34e-05
Lnc_000915	ch11	1	21428083	21512628	1082	0	0	0	0.0175707	0.611199	0.209224	0	0	0	0	0	0	0.611199	0	5.80821	0.0063486
Lnc_000926	ch11	1	36350531	36362849	2335	5.03806	11.7402	7.72231	3.81857	1.66897	3.2699	0.203824	0.16005	0.180549	0.0891449	0.0521771	0.0559665	11.7402	0.0521771	-1.74907	6.1e-08
Lnc_000929	ch11	1	53479430	53481998	2344	0.268719	1.03291	0.622964	0.997615	2.52911	1.58038	0.609123	1.16511	1.07913	0.725222	0.956373	0.825124	2.52911	0.268719	1.1577	0.0124349
Lnc_000940	ch11	-1	16181350	16184303	1845	0.411684	0.691409	0.63556	0.113347	0.19202	0.100391	0	0	0	0	0	0	0.691409	0	-2.44383	0.000367866
Lnc_000964	ch11	-1	49377191	49385175	2411	1.72118	1.74925	1.68849	0.638709	0.489807	0.546298	0	0.0119234	0	0	0	0	1.74925	0	-2.01447	3.99e-07
Lnc_000969	ch12	1	3602298	3604399	2102	0.0705073	0.173393	0.0947298	0.886357	0.70788	0.851792	0.0905667	0	0.0573034	0.082522	0.0579608	0.0373021	0.886357	0	2.57981	4.58e-05
Lnc_000974	ch12	1	13890639	13892334	1331	0.0139187	0.136916	0.0831129	0.342806	0.567837	0.402015	1.26342	1.23111	1.44796	1.53782	1.83071	1.64948	1.83071	0.0139187	2.29943	0.0285384
Lnc_000976	ch12	1	29075566	29086692	6945	14.4152	26.6034	20.0348	67.8773	49.3455	61.3846	0.292387	0.186268	0.351209	0	0	0	67.8773	0	1.2409	6.13e-09
Lnc_000977	ch12	1	29500120	29509324	1530	0	0.153139	0.0433817	0.285793	0.771846	0.430433	0.0414752	0	0	0	0	0	0.771846	0	2.82064	0.00960478
Lnc_000979	ch12	1	31836320	31844721	1189	0	0.0218954	0.0186078	0.111926	0.47674	0.103852	0	0	0	0	0	0	0.47674	0	3.8794	0.0341758
Lnc_000998	ch12	1	61691365	61692399	1028	0	0.0253246	0	0.369873	1.01091	0.720703	0	0	0	0	0	0	1.01091	0	6.12847	8.18e-05
Lnc_001003	ch12	1	64528955	64531518	2564	0.0650281	0.0913818	0.0690317	0.192784	0.893523	0.529752	0.0123746	0	0	0	0	0	0.893523	0	2.45666	0.00140431
Lnc_001010	ch12	-1	4513562	4524521	5462	0.0305258	0.0762612	0.0445572	1.61155	2.7934	2.03088	0.0116179	0.00526317	0.0110263	0	0.00446113	0	2.7934	0	5.11442	1.07e-36
Lnc_001011	ch12	-1	4622483	4624609	1083	0.068424	0	0	0.754841	0.850527	0.893134	0	0	0	0	0	0	0.893134	0	4.48538	0.000163081
Lnc_001015	ch12	-1	7768851	7770960	2055	0.16227	0.126685	0.161494	0.379304	0.735564	0.510747	0	0	0	0	0.0118573	0.0127184	0.735564	0	1.40977	0.0470943
Lnc_001026	ch12	-1	29112887	29123805	2844	0.136794	0.338694	0.194485	0.447879	1.39519	0.817704	0.122719	0.141513	0.169412	0.0365952	0.0171355	0.02757	1.39519	0.0171355	1.68636	0.00229193
Lnc_001028	ch12	-1	35455832	35459855	4024	1.71723	2.08321	1.91337	4.90405	4.53705	4.62336	0.0788482	0.014288	0.0299334	0	0	0	4.90405	0	0.928235	0.000332245
Lnc_001041	ch12	-1	60332175	60338735	2404	4.18449	6.40012	4.96056	25.4567	28.2164	26.7353	6.55952	8.94471	7.27772	39.2525	40.0165	39.7373	40.0165	4.18449	2.02683	1.33e-22

## Sheet: Table S2-2
lncRNA_ID	Chromosome	Strand	Start_AssambledTU	End_AssambledTU	MaxIsoformLength	M82_CK_rep1_TPM	M82_CK_rep2_TPM	M82_CK_rep3_TPM	M82_T_rep1_TPM	M82_T_rep2_TPM	M82_T_rep3_TPM	P_CK_rep1_TPM	P_CK_rep2_TPM	P_CK_rep3_TPM	P_T_rep1_TPM	P_T_rep2_TPM	P_T_rep3_TPM	MaxTPM	MinTPM	P_CK_VS_P_T_Foldchange	P_CK_VS_P_T_Pvalue
Lnc_000003	ch00	1	4263128	4268972	5844	8.27067	9.30601	8.75295	7.88891	6.89075	7.42348	0.124873	0.0393531	0.0927504	0	0	0	9.30601	0	-6.6534	1.27e-05
Lnc_000007	ch00	1	6849996	6872323	16941	0.00437419	2.54021	1.08658	0.996527	2.97653	1.60719	0.0262204	0.00678766	0.0159977	0	0	0	2.97653	0	-5.79966	0.000769408
Lnc_000046	ch00	-1	6724641	6725708	1035	0.0178993	0.100613	0.106882	0.0918428	0.821513	0.318146	0.2759	0	0.261852	0	0	0	0.821513	0	-5.22751	0.0420224
Lnc_000048	ch00	-1	6855380	6872317	16892	0.00219344	2.28403	1.00983	0.801335	2.71252	1.50099	0.0300531	0.00680735	0.0196094	0	0	0	2.71252	0	-6.0006	0.000410597
Lnc_000060	ch00	-1	8616874	8913522	1945	0	1.91404	0.625633	1.04587	2.78079	1.57657	0.277319	0.0295603	0.123858	0.0178366	0	0.0134377	2.78079	0	-3.92036	0.0124245
Lnc_000075	ch00	-1	10442564	10450838	7222	0.00769556	1.90692	0.787322	0.726552	2.58685	1.26809	0.0615064	0	0.0333569	0	0	0	2.58685	0	-5.53187	0.0262407
Lnc_000078	ch00	-1	11343634	11488835	1207	1.93393	438.711	195.951	241.431	782.208	447.169	13.3013	2.04828	8.85675	0.22994	0.242254	0.21654	782.208	0.21654	-5.19568	2.44e-16
Lnc_000079	ch00	-1	11551354	11806601	2199	0.0421232	4.91313	2.03237	1.80691	6.55174	3.37854	0.0577145	0.0261459	0.0684697	0	0	0	6.55174	0	-4.48499	0.0341246
Lnc_000094	ch01	1	3321879	3363978	1355	0	0.749308	0.17961	0.23852	0.749517	0.334142	1.0303	0.0424316	0.666708	0.0512063	0.179828	0.0964442	1.0303	0	-2.4549	0.0249032
Lnc_000098	ch01	1	18626354	18627376	1011	0	0.540759	0.350143	0.169241	1.44841	0.631041	0.815966	0	0.44678	0.0343148	0	0	1.44841	0	-5.46818	0.00767562
Lnc_000103	ch01	1	27794115	27806782	2447	0.688944	1.26604	0.958404	1.58494	2.92456	2.01848	0.492719	0.199717	0.369182	0.0992422	0.109536	0.117491	2.92456	0.0992422	-1.7488	0.00358267
Lnc_000154	ch01	-1	5189827	5196144	3712	0.988175	1.97777	1.34107	1.88476	1.60341	1.67989	0.470116	0.0232334	0.227145	0	0.0262572	0.0211231	1.97777	0	-3.93978	0.00150117
Lnc_000160	ch01	-1	8974289	8989704	11889	2.48849	2.98241	2.65742	3.20935	3.18251	3.13487	0.0213498	0.0217619	0.0101314	0	0.00204952	0	3.20935	0	-4.43753	0.00677822
Lnc_000162	ch01	-1	11566342	11575238	4270	3.91341	7.20041	5.34723	2.82278	1.3275	2.29417	0.0148611	0.0538594	0.0352611	0	0	0	7.20041	0	-4.87933	0.014198
Lnc_000181	ch01	-1	43076683	43084071	1452	0	0.394449	0.152374	0.091653	0.406654	0.184257	0	0	0	0.167249	0.100689	0.144002	0.406654	0	5.11818	0.00359929
Lnc_000198	ch01	-1	71897865	71901756	2270	0.448863	1.0207	0.711498	1.00501	0.801156	0.852215	0.223637	0.734516	0.371437	1.1615	0.98755	1.02473	1.1615	0.223637	1.21364	0.00813441
Lnc_000200	ch01	-1	72624773	72631432	6660	1.63283	2.51737	1.99654	2.54342	2.84769	2.6853	0.00952809	0.0172657	0.0180859	0	0	0	2.84769	0	-4.31294	0.0460775
Lnc_000203	ch01	-1	74604961	74623864	6357	2.29642	3.23117	2.67292	5.52669	4.51415	5.28989	0.0698756	0.0135665	0.0473698	0.00545733	0	0	5.52669	0	-4.84034	0.00360888
Lnc_000205	ch01	-1	78891665	78894404	1519	0	0.856934	0.305871	0.538178	1.58597	0.921294	0.229766	0	0.158594	0	0	0	1.58597	0	-5.31403	0.0370154
Lnc_000208	ch01	-1	95925680	95931132	5453	1.09055	1.43226	1.25372	1.75018	2.16997	2.0531	0.261835	0	0.0994009	0	0.0044685	0.00479303	2.16997	0	-5.28221	0.00357947
Lnc_000215	ch02	1	6547083	6561200	2291	4.47983	10.6248	6.98216	7.55147	6.59792	7.13251	0.0415476	0.025096	0.0657201	0	0	0	10.6248	0	-4.33955	0.0464467
Lnc_000225	ch02	1	24974793	24992061	2717	0.0204554	8.59485	3.50151	5.01001	12.7872	7.65788	0.0350333	0.0423223	0.0554158	0	0	0	12.7872	0	-4.58658	0.0233017
Lnc_000234	ch02	1	39312953	39313954	859	1.91944	1.48504	1.4166	1.52711	1.04482	1.48541	0.11081	0.501992	0.315502	2.05973	1.36159	1.52133	2.05973	0.11081	2.36111	5.05e-05
Lnc_000238	ch02	1	40197536	40205424	2917	0.349303	1.27625	0.621948	1.11449	2.02421	1.30522	2.00139	3.11422	2.3537	0.844412	1.16112	0.896002	3.11422	0.349303	-1.40275	1.39e-08
Lnc_000240	ch02	1	42171926	42176624	2908	0.108301	0.492384	0.319545	0.254968	0.804068	0.48124	0.0872862	0.0197713	0.0310656	0	0	0	0.804068	0	-4.75421	0.0234582
Lnc_000257	ch02	-1	37094176	37101754	3160	0.445557	1.12044	0.728154	0.655775	0.336339	0.521015	0.120488	0.0454864	0.0952942	0.186635	0.308439	0.198504	1.12044	0.0454864	1.36841	0.0281321
Lnc_000263	ch02	-1	47404765	47410470	5706	0.40584	0.798439	0.523454	3.31518	3.73773	3.33263	0.633903	0.785945	0.670232	1.66591	1.96437	1.90549	3.73773	0.40584	1.36126	1.39e-16
Lnc_000269	ch03	1	240505	249696	1344	0	0.135592	0.0164618	0.254618	0.667785	0.398127	3.25784	0.278063	2.12852	0.413003	0.52577	0.369487	3.25784	0	-2.17487	0.00477241
Lnc_000284	ch03	1	28299229	28305675	4626	4.11684	7.603	5.80139	5.73714	4.98817	5.4987	0.0480112	0.0559289	0.039057	0	0	0	7.603	0	-5.46173	0.00126358
Lnc_000298	ch03	1	64320767	64323338	1227	0.452953	0.95478	0.667166	0.759219	0.55822	0.670907	0.18101	0.210861	0.147252	0.0565481	0.0397175	0.0426021	0.95478	0.0397175	-2.02127	0.0464499
Lnc_000299	ch03	1	67170067	67358386	3585	8.50584	9.65824	8.9733	9.67808	7.29966	8.87498	0.0354014	0.0721693	0.0419985	0	0	0	9.67808	0	-5.15475	0.00475573
Lnc_000303	ch03	-1	1267061	1272783	1041	0	0.350117	0.19128	0.27394	0.839466	0.514008	1.21916	0.165691	0.809955	0.199955	0.163849	0.125535	1.21916	0	-2.23078	0.010052
Lnc_000318	ch03	-1	22848940	22857286	1545	0	0.387556	0.214803	0.479901	1.11595	0.692663	1.88934	0.0558203	1.30587	0	0.047314	0.0507502	1.88934	0	-5.0595	4.86e-05
Lnc_000329	ch03	-1	56439682	56441957	1288	0.302051	0.485099	0.326373	0.693741	0.788505	0.655111	0.221706	0.0892777	0.233796	0.350155	0.889158	0.710228	0.889158	0.0892777	1.80089	0.00783736
Lnc_000334	ch03	-1	71389518	71393687	4170	0.15105	0.299668	0.217533	9.19115	10.5462	9.71755	0.266307	0.330906	0.245525	9.25958	9.52464	9.56453	10.5462	0.15105	5.02365	3.14e-201
Lnc_000337	ch04	1	9970743	10071978	695	0	1.49834	0.891353	0.492383	2.54876	1.30291	1.05001	0	0.563264	0	0.03506	0.0376063	2.54876	0	-4.46706	0.0156136
Lnc_000354	ch04	1	56099449	56105672	4467	0.016589	0.227292	0.128776	0.880988	2.01447	1.29461	0.0284115	0.012871	0.0134824	0.178626	0.0709128	0.146275	2.01447	0.012871	2.80877	0.00105515
Lnc_000355	ch04	1	56156481	56163736	344	0	0.0756793	0	0	0.137317	0.119652	2.85926	0.250704	1.57568	0	0.354167	0.303911	2.85926	0	-2.8504	0.0191335
Lnc_000357	ch04	1	58757675	58758561	581	62.9111	63.1798	64.013	67.1454	24.4722	51.4679	0.273051	0.0989585	0.259148	0	0	0	67.1454	0	-4.61717	0.0259446
Lnc_000359	ch04	1	59692236	59694494	1915	1.01577	1.59057	1.09757	2.23372	13.2091	6.44807	0.132547	0.270211	0.125798	1.06885	0.827069	1.07821	13.2091	0.125798	2.44137	1.23e-07
Lnc_000360	ch04	1	60932093	60942434	6080	1.84648	2.90738	2.15424	3.33326	3.0067	3.2021	1.1846	1.01656	0.886549	2.25385	1.96376	2.14078	3.33326	0.886549	0.994847	6.15e-09
Lnc_000364	ch04	-1	2672533	2677232	3453	1.14277	1.8547	1.39681	4.61384	2.9754	3.9396	0.339981	0.391291	0.383716	0.140658	0.12702	0.128676	4.61384	0.12702	-1.54259	0.000108776
Lnc_000376	ch04	-1	27649567	27732457	17200	0.316662	0.709871	0.45407	5.98419	1.49263	4.3625	0.00922341	0.0200564	0.014006	0	0	0	5.98419	0	-5.628	0.000806354
Lnc_000394	ch04	-1	52673597	52676411	2503	0.540305	0.696866	0.556873	0.789929	0.783194	0.781106	0.0507048	0.0114852	0.0721845	0.415808	0.418605	0.302819	0.789929	0.0114852	3.04194	1.95e-05
Lnc_000397	ch04	-1	62577957	62579966	1265	0.219673	0.452759	0.174899	0.856643	1.32562	0.829711	1.73065	1.20444	1.40448	0.658193	0.365982	0.661157	1.73065	0.174899	-1.42228	0.000523949
Lnc_000398	ch04	-1	65288960	65291340	1819	0.468492	0.615419	0.450034	1.02426	0.532357	0.724093	1.04657	1.10628	1.00984	2.21237	2.19689	2.35644	2.35644	0.450034	1.05162	1.01e-06
Lnc_000422	ch05	1	27335969	27344797	566	0.0981932	5.10554	2.26719	3.02302	6.6766	3.81786	261.732	3.50455	151.203	1.77752	11.3654	7.3422	261.732	0.0981932	-4.41602	0.00174459
Lnc_000442	ch05	1	49418643	49430161	1169	2.15527	5.54524	3.59597	7.38341	8.36446	7.6053	0.271416	0.0737744	0.206077	0	0.0208441	0.0223579	8.36446	0	-3.63281	0.0159327
Lnc_000449	ch05	1	52661775	52667352	5578	0.269019	0.746753	0.527533	0.927056	0.901889	0.981409	0.0398171	0.0463835	0.0269926	0.180365	0.109209	0.135883	0.981409	0.0269926	1.85716	0.00175073
Lnc_000462	ch05	-1	2563075	2564831	1589	0.816114	2.12988	1.64299	4.03201	2.69034	3.6912	0.359417	0.70557	0.397969	1.37546	2.11618	1.79287	4.03201	0.359417	1.80977	2.88e-06
Lnc_000465	ch05	-1	13113893	13119594	2730	0.006786	0.00953614	0.00810427	0.0278556	0.0951661	0.0603079	2.33606	1.96915	2.21711	0.216032	0.365947	0.239344	2.33606	0.006786	-3.0186	1.69e-25
Lnc_000469	ch05	-1	19177000	19182872	927	0	0.196586	0.0716009	0	0	0	1.43754	2.76	2.20893	7.03575	5.78282	6.40017	7.03575	0	1.53945	2.23e-08
Lnc_000474	ch05	-1	24382551	24391395	6771	1.56228	1.96858	1.68606	2.33326	2.26383	2.33429	0.0515454	0.012737	0.0311314	0	0	0	2.33429	0	-5.43791	0.00294647
Lnc_000475	ch05	-1	24514040	24532739	714	2.33518	3.68263	2.26205	2.55616	2.94404	2.94001	1.24426	1.32866	1.13873	0.68024	0.58016	0.549083	3.68263	0.549083	-1.08991	0.0148626
Lnc_000489	ch05	-1	54609692	54614491	2954	0.388828	1.23382	0.681566	0.978247	1.10337	1.07986	0.139631	0.223829	0.122328	0.751626	0.57741	0.796301	1.23382	0.122328	2.08025	3.78e-07
Lnc_000496	ch05	-1	60070628	60070963	256	0.0723664	0.203388	0.0864245	0	0.0922597	0.0803909	3.47031	0	1.88206	0.135517	0.0951825	0.20419	3.47031	0	-3.68622	0.0171113
Lnc_000504	ch06	1	5472490	5478241	5721	0.00323821	0.423201	0.177895	0.309048	0.577974	0.42448	0.0554598	0	0.0368451	0	0	0	0.577974	0	-5.15441	0.0478785
Lnc_000528	ch06	1	49736897	49751510	452	0.122959	54.3712	24.5721	22.3763	53.0893	34.1028	12.7055	0.254402	7.395	0	0.539087	0.173471	54.3712	0	-4.88707	0.00394681
Lnc_000547	ch06	-1	25844757	25852614	1887	0.0196352	0.731205	0.24622	0.675023	1.30171	1.00337	0.840714	0	0.398953	0.0183849	0	0.0138508	1.30171	0	-5.39344	0.00248073
Lnc_000548	ch06	-1	29838518	29840657	1216	0	0.428185	0.200141	0.14071	0.505001	0.186168	0.704499	2.60051	1.43631	0.427947	0.701345	0.623318	2.60051	0	-1.46595	0.00763951
Lnc_000555	ch06	-1	44630640	44634809	1028	586.608	59.6394	353.909	383.114	239.172	334.146	4.38274	3.49555	3.92523	1.18116	2.25179	1.60174	586.608	1.18116	-1.26696	3.99e-05
Lnc_000556	ch07	1	194718	197612	413	0.0897133	2.14321	1.01784	0.460326	1.3725	0.747461	79.4366	11.9723	49.2161	13.2721	15.4578	15.1882	79.4366	0.0897133	-1.7407	0.0165958
Lnc_000568	ch07	1	13495888	13504005	7600	0.0024376	0.8872	0.35807	0.267661	0.75517	0.446804	0.183692	0.00378256	0.0950935	0	0.00961844	0.003439	0.8872	0	-4.43223	0.00252995
Lnc_000570	ch07	1	16812647	16815800	1150	0	0.022638	0.0192388	0.413293	0.431294	0.357914	0.965651	0.249978	0.602259	2.2022	1.44081	1.93182	2.2022	0	1.56511	0.00319603
Lnc_000579	ch07	1	33793440	33794667	854	0	0.182906	0	0.26714	0.636095	0.481969	2.34063	2.28902	2.04514	6.01224	5.4497	6.58	6.58	0	1.38861	2.62e-10
Lnc_000588	ch07	1	47823882	47832248	1056	0.0350867	0.788899	0.419028	0.522095	0.760444	0.409263	0.180276	0.0544459	0.0285161	1.05128	0.715311	0.816762	1.05128	0.0285161	3.25962	2.65e-05
Lnc_000593	ch07	1	54110472	54111754	934	0.476037	0.864072	0.781707	0.569937	0.859774	0.572893	0.135882	0.0615577	0.0644817	0.557156	0.286974	0.419749	0.864072	0.0615577	2.22358	0.0117965
Lnc_000600	ch07	1	67637115	67637931	457	0.0405378	0.0569664	0.0484128	0	0	0	6.31794	6.91951	6.45748	37.6528	40.309	40.4342	40.4342	0	2.54253	1.79e-73
Lnc_000603	ch07	-1	746472	751307	4317	0.0429136	0.211067	0.0973752	1.29914	1.81091	1.38726	0.0955457	0.179796	0.0697544	0.305375	0.372528	0.266389	1.81091	0.0429136	1.4074	0.00430348
Lnc_000607	ch07	-1	3306386	3308778	2393	0.402566	0.59835	0.591717	6.28419	7.95508	7.3703	0.769016	1.0091	0.893447	3.11694	3.38059	3.53873	7.95508	0.402566	1.86407	2.89e-22
Lnc_000609	ch07	-1	4585764	4590659	2721	2.51913	1.96137	2.16287	2.47338	2.84707	2.75309	0.687976	0.19017	0.486942	0.101999	0.250742	0.134476	2.84707	0.101999	-1.53033	0.0201091
Lnc_000611	ch07	-1	6722580	6724800	1766	3.09462	4.68783	3.62063	7.29885	9.24144	8.50706	0.0359327	0.0651131	0.034103	0.0785781	0.262156	0.192397	9.24144	0.034103	1.94364	0.0458614
Lnc_000628	ch07	-1	22881621	22890665	4620	0.0280694	0.24794	0.148456	0.0987608	0.613467	0.298456	0.0480735	0.105781	0.0325898	0.322893	0.274257	0.231946	0.613467	0.0280694	2.10276	0.000188237
Lnc_000630	ch07	-1	27020572	27030705	3299	0.29201	1.40467	0.865135	1.40036	1.53209	1.4348	0.259676	0.514125	0.301221	0.0525799	0.0886331	0.0950702	1.53209	0.0525799	-2.20876	6.12e-05
Lnc_000637	ch07	-1	33234984	33237191	1656	0	0.0786041	0.0534412	0.206646	0.0998366	0.161559	2.89312	6.64871	4.60059	1.61311	1.48613	1.38889	6.64871	0	-1.69615	1.18e-07
Lnc_000647	ch07	-1	49873084	49884818	2216	0	0.364189	0.189697	0.265954	0.586199	0.362195	0.0715897	0.0129727	0.0679444	0	0	0	0.586199	0	-4.50208	0.0434798
Lnc_000650	ch07	-1	56095155	56098279	2875	0.547719	1.77482	0.961942	10.7059	13.7439	11.575	0.353152	0.479957	0.523704	0.19307	0.254261	0.227273	13.7439	0.19307	-1.0455	0.00783033
Lnc_000656	ch07	-1	61947284	61949654	2181	0.81544	0.620702	0.750676	0.156903	0.303218	0.349135	0.0581908	0.474511	0.138069	0.0477197	0.0446891	0.0479347	0.81544	0.0446891	-2.29094	0.0229289
Lnc_000663	ch08	1	7553849	7570477	4384	5.28222	7.80297	6.49508	8.74249	9.28793	8.95215	0.0506614	0.0918029	0.0549506	0	0	0	9.28793	0	-5.84623	0.000284798
Lnc_000664	ch08	1	9347980	9400469	9056	0.00409138	1.09815	0.527708	0.386275	1.2649	0.634037	0.0700719	0	0.0266016	0.00383086	0	0.00288608	1.2649	0	-3.96902	0.0365972
Lnc_000680	ch08	1	47253668	47312709	4719	3.16811	4.84925	3.97109	11.9733	3.54853	9.00133	0.0336179	0.0487348	0.0255249	0	0	0	11.9733	0	-5.08219	0.00577772
Lnc_000684	ch08	1	50849154	50864061	12970	0.201398	0.537935	0.370166	1.49072	2.17246	1.80413	0.0269093	0.00221646	0.0208957	0	0	0	2.17246	0	-5.44697	0.00685995
Lnc_000686	ch08	1	53834097	53841566	2506	0	0.457095	0.185402	0.432423	0.716283	0.476315	1.30409	0.0114714	0.708964	0	0.0388934	0	1.30409	0	-5.69903	0.000298859
Lnc_000688	ch08	1	55106803	55109566	2764	5.02019	6.93226	6.1155	10.5168	8.51086	9.77628	0.0459168	0.062404	0.0217894	0	0	0	10.5168	0	-4.58123	0.027701
Lnc_000689	ch08	1	58462004	58469147	1170	0	0	0	0.0974946	0.585416	0.175898	1.49151	0.122852	1.10672	0.20756	0.249915	0.35742	1.49151	0	-1.79502	0.0398236
Lnc_000693	ch08	1	62131287	62132539	1120	0.0330818	0.069733	0.0790167	0.611082	1.09657	0.735003	0.226632	0.102669	0.107546	0.743405	0.500388	0.746754	1.09657	0.0330818	2.14445	0.00114451
Lnc_000697	ch08	-1	5157824	5178564	6160	1.53078	3.01754	2.22683	2.30236	2.51522	2.36537	0.164824	0.23334	0.171096	0.0112637	0	0	3.01754	0	-5.98614	1.72e-07
Lnc_000702	ch08	-1	9391774	9399088	3625	0	1.04135	0.360098	0.634589	1.39431	0.987844	0.175054	0	0.116298	0	0	0	1.39431	0	-6.15526	0.00780247
Lnc_000708	ch08	-1	22264000	22266860	2860	2.68818	5.1066	3.5121	4.87252	4.55853	4.77084	0.110939	0.0603093	0.084232	0	0.0340793	0.00913859	5.1066	0	-2.53251	0.0389783
Lnc_000732	ch09	1	13479111	13482244	3131	1.89341	3.10974	2.48735	4.35363	4.428	4.60768	0	0.00918155	0	0.110802	0.0466944	0.0333904	4.60768	0	4.14811	0.0154417
Lnc_000749	ch09	1	62735386	62738462	2422	0	0.0859906	0.0548092	0.706454	2.14536	1.28307	0.0131001	0.0118693	0.0248662	0.071619	0.110666	0.118704	2.14536	0	2.55681	0.0229208
Lnc_000758	ch09	-1	1299626	1304035	3993	27.1832	28.0157	27.9592	6.63235	3.8329	5.70037	0.254273	0.0359973	0.128204	0	0.0244094	0	28.0157	0	-4.07566	0.00362345
Lnc_000763	ch09	-1	5765783	5766647	555	0	1.2196	0.597964	0.342549	1.70223	0.889949	0.457348	0.0517972	0.325545	0	0	0	1.70223	0	-4.96022	0.0190024
Lnc_000764	ch09	-1	6981983	6984702	2083	0.862699	1.3748	1.05153	3.28571	4.14996	3.90261	0	0.013801	0	0.166549	0.105281	0.163117	4.14996	0	4.75538	0.00168646
Lnc_000786	ch09	-1	48119376	48128131	3709	13.5709	19.0427	15.8851	24.4858	21.5171	23.4099	0.102654	0.085258	0.0324756	0	0	0	24.4858	0	-5.77036	0.000693214
Lnc_000799	ch10	1	2483266	2502424	1670	5.84616	11.1306	9.12808	6.96707	10.0273	7.98556	0.265988	0.103284	0.126222	0	0.0291817	0.0156505	11.1306	0	-3.4213	0.0084504
Lnc_000800	ch10	1	3324729	3333645	1205	0.0153741	1.27468	0.5141	0.457537	1.94044	0.922261	1.23754	0.310138	0.4998	1.38193	1.7997	1.56168	1.94044	0.0153741	1.1592	0.0379978
Lnc_000810	ch10	1	24193055	24595644	3698	0.0851645	0.288637	0.203418	0.400999	0.427917	0.383998	0.308877	0.652997	0.358294	1.26648	1.66047	1.51249	1.66047	0.0851645	1.70717	1.63e-07
Lnc_000832	ch10	1	53077634	53085405	1485	0.0748517	1.50767	0.625748	0.806547	1.39961	1.01168	0.405954	0.0967927	0.344727	0.0700853	0.0492257	0.105602	1.50767	0.0492257	-1.96703	0.0314497
Lnc_000837	ch10	1	59628376	59628882	474	0	0	0	0	0	0	0.133876	0.121297	0	2.48847	2.72455	3.08784	3.08784	0	4.98369	6.41e-09
Lnc_000839	ch10	1	60000827	60007962	988	3.78766	11.6993	7.50178	7.36983	8.58202	8.39451	0.16057	0.145483	0.121915	0	0	0	11.6993	0	-4.81785	0.0119632
Lnc_000841	ch10	1	62602391	62604373	407	6.05388	7.9956	5.7622	2.00858	0.232123	1.06187	0.467743	2.26024	1.55374	0	0.359214	0.256869	7.9956	0	-2.78095	0.00787524
Lnc_000842	ch10	1	62883283	62884869	1198	0	0.0217309	0.018468	0.047608	0.216864	0.103072	1.40368	0.839867	1.13112	0.0579169	0.203395	0.19635	1.40368	0	-2.88913	8.95e-07
Lnc_000846	ch10	-1	5449943	5451640	734	6.99134	9.64735	7.44522	8.34018	13.2572	10.3461	0.432269	0.0391654	0.246155	0	0	0	13.2572	0	-5.14743	0.0135528
Lnc_000851	ch10	-1	10798374	10799823	1411	0.0525182	0.147604	0.0156801	0	0.401732	0.116684	0	0	0	0.147522	0.0345382	0.129663	0.401732	0	4.67328	0.0218834
Lnc_000858	ch10	-1	23971939	23979090	630	0.29406	0.206616	0.316067	0.422477	0.412386	0.326668	0.705079	0.593201	0.621378	1.21148	1.50842	1.49351	1.50842	0.206616	1.09374	0.0177987
Lnc_000861	ch10	-1	25319874	25320341	427	1.43174	3.23134	2.1762	1.51379	2.2125	1.63869	2.52639	3.23156	2.75036	0.812465	0.627714	0.979349	3.23156	0.627714	-1.86321	3.89e-05
Lnc_000865	ch10	-1	32563562	32567542	3818	0.08734	0.286384	0.104307	0.124486	0.0804192	0.145538	1.23823	0.745415	1.14363	0.36346	0.389306	0.355969	1.23823	0.0804192	-1.54434	5.87e-07
Lnc_000870	ch10	-1	34825606	34839438	13775	2.26479	3.80063	2.85091	5.0251	6.05936	5.40087	0.0207301	0.058434	0.0262327	0.0176295	0.00353782	0.00379475	6.05936	0.00353782	-2.17252	0.0230918
Lnc_000877	ch10	-1	46912857	46922151	4388	2.98912	3.60722	3.33282	3.7217	2.92809	3.47066	0.983382	1.71646	1.24899	0.561338	0.499773	0.619458	3.7217	0.499773	-1.2752	2.37e-06
Lnc_000878	ch10	-1	46979238	46987405	1217	0	0.577575	0.290875	0.374918	0.562807	0.524226	0.729991	0	0.247436	0	0	0	0.729991	0	-6.33191	0.00627293
Lnc_000892	ch10	-1	58466760	58484439	10540	3.4503	5.52042	4.35146	5.69983	5.99426	5.86357	0.0632162	0.0872787	0.0857105	0.0197489	0.013871	0.0148784	5.99426	0.013871	-2.34753	5.41e-05
Lnc_000893	ch10	-1	58484940	58491188	6239	6.39005	9.00475	7.59593	10.7414	9.18013	10.0641	0.0457696	0.092154	0.101358	0.00556055	0	0	10.7414	0	-5.67101	7.51e-05
Lnc_000894	ch10	-1	61185852	61191204	603	0	0	0	0	0.0391683	0	1.36806	0.762784	0.848956	0.517795	0.363682	0.390095	1.36806	0	-1.28936	0.0346027
Lnc_000897	ch11	1	3329335	3333836	4496	0.0988921	0.526927	0.270653	0.498966	0.551588	0.540136	0.331682	0.230184	0.314793	0.131176	0.140911	0.156958	0.551588	0.0988921	-1.07444	0.0066453
Lnc_000901	ch11	1	10369356	10405883	472	0.0392495	0	0	0.0402785	0.100078	0.0436019	29.7119	10.8412	22.4571	7.05605	8.62127	6.86634	29.7119	0	-1.53716	3.68e-05
Lnc_000905	ch11	1	12568850	12570482	1430	0	0.50975	0.201133	0.265894	1.17267	0.662017	0.310629	0	0.147406	0	0	0	1.17267	0	-5.46794	0.0298237
Lnc_000925	ch11	1	34309645	34318978	7571	9.25188	13.3659	11.4992	14.4061	13.5859	13.9502	0.041908	0.0873321	0.0517063	0	0	0	14.4061	0	-6.50771	1.18e-05
Lnc_000926	ch11	1	36350531	36362849	2335	5.03806	11.7402	7.72231	3.81857	1.66897	3.2699	0.203824	0.16005	0.180549	0.0891449	0.0521771	0.0559665	11.7402	0.0521771	-1.53542	0.0285856
Lnc_000928	ch11	1	50827133	50834793	660	0	0	0	0	0	0	1.39413	0	0.63876	0	0.0369193	0	1.39413	0	-5.54132	0.00698766
Lnc_000936	ch11	-1	10405408	10406927	973	0.0190399	0.107024	0.0454772	0.312624	0.339834	0.35957	33.1307	2.68861	18.2597	2.46019	3.40583	3.14281	33.1307	0.0190399	-2.65047	0.00352027
Lnc_000939	ch11	-1	15637248	15652891	295	0	0.176499	0.0749989	0.128891	0.160125	0.069763	89.1626	2.63112	55.2241	2.11681	1.65198	1.94915	89.1626	0	-4.7494	4.12e-05
Lnc_000946	ch11	-1	21358740	21367513	1849	0.721394	1.71774	1.00512	1.25441	2.78466	1.72521	0.686393	1.18161	0.895734	2.30781	1.80543	2.06377	2.78466	0.686393	1.11308	0.000101828
Lnc_000963	ch11	-1	48460535	48467545	5497	0.519005	0.904572	0.72045	0.823126	0.889399	0.924737	0.0230879	0.0209186	0.0219123	0	0	0	0.924737	0	-4.59499	0.0218993
Lnc_000967	ch12	1	699722	703452	482	0	1.02622	0.275411	0.197214	1.27403	0.555064	42.6558	3.22067	24.3028	5.18224	7.12802	6.34431	42.6558	0	-1.97618	0.0325759
Lnc_000968	ch12	1	2358890	2364859	2241	0.338937	0.801572	0.572615	0.916215	1.1804	0.991811	61.1351	23.783	44.0474	15.9916	16.5489	16.5379	61.1351	0.338937	-1.44917	7.34e-07
Lnc_000976	ch12	1	29075566	29086692	6945	14.4152	26.6034	20.0348	67.8773	49.3455	61.3846	0.292387	0.186268	0.351209	0	0	0	67.8773	0	-8.58864	1.91e-11
Lnc_000978	ch12	1	29653107	29655422	384	0	0	0	0	0	0	0.165253	0	0.156838	1.71654	2.34783	1.56546	2.34783	0	4.10632	1.84e-05
Lnc_000982	ch12	1	34113180	34113984	781	0	0.633341	0.311615	0.121712	0.695551	0.579721	1.05626	0	0.694025	0	0	0	1.05626	0	-6.52779	0.00350893
Lnc_000990	ch12	1	40378390	40383379	4990	7.90409	11.3056	9.65682	12.6108	10.9762	12.1625	0.0699427	0.0576101	0.0663813	0	0	0	12.6108	0	-6.01278	9.6e-05
Lnc_000996	ch12	1	60203767	60213205	4570	0.818864	2.06788	1.38945	2.25891	2.13962	2.12556	1.32607	0.962441	1.17289	0.0607304	0.175952	0.114382	2.25891	0.0607304	-3.31969	3.37e-18
Lnc_001000	ch12	1	62232315	62238601	6284	7.95394	12.6813	10.0836	13.7201	14.3199	14.1283	0.0605892	0.0594711	0.0622961	0	0	0	14.3199	0	-6.25548	2.52e-05
Lnc_001026	ch12	-1	29112887	29123805	2844	0.136794	0.338694	0.194485	0.447879	1.39519	0.817704	0.122719	0.141513	0.169412	0.0365952	0.0171355	0.02757	1.39519	0.0171355	-2.49445	0.00283186
Lnc_001028	ch12	-1	35455832	35459855	4024	1.71723	2.08321	1.91337	4.90405	4.53705	4.62336	0.0788482	0.014288	0.0299334	0	0	0	4.90405	0	-5.05753	0.0120916
Lnc_001030	ch12	-1	37885314	37894148	1087	0	0.83825	0.346016	0.122429	1.89035	0.889847	0.875673	0	0.609462	0.0638312	0.0224165	0.048089	1.89035	0	-3.55135	0.016532
Lnc_001040	ch12	-1	58953474	58955635	2162	0	0.577991	0.32747	0.307771	0.633613	0.38076	0.337538	0	0.181068	0	0	0	0.633613	0	-6.24326	0.00672766
Lnc_001041	ch12	-1	60332175	60338735	2404	4.18449	6.40012	4.96056	25.4567	28.2164	26.7353	6.55952	8.94471	7.27772	39.2525	40.0165	39.7373	40.0165	4.18449	2.34087	2.58e-94
