# Supplementary material for: Identification and Characterization of Long Non-coding RNA in Tomato Roots Under Salt Stress
Source: Front Plant Sci. 2022 Jul 4;13:834027. doi: 10.3389/fpls.2022.834027 (PMC9295719; doi:10.3389/fpls.2022.834027)
Supplement: Supplementary Table 5 — KEGG enrichment results of cis-regulated target genes pairs in M82 and S. pennellii. [file Table_5.XLSX]

## Sheet: Table S5-1
Term	Database	ID	Input number	Background number	P-Value	Corrected P-Value
Phenylpropanoid biosynthesis	KEGG PATHWAY	sly00940	21	222	0.000357272	0.0321545
Plant hormone signal transduction	KEGG PATHWAY	sly04075	23	300	0.00265936	0.0823278
Phenylalanine metabolism	KEGG PATHWAY	sly00360	8	59	0.00350153	0.0823278
Amino sugar and nucleotide sugar metabolism	KEGG PATHWAY	sly00520	13	134	0.00365901	0.0823278
DNA replication	KEGG PATHWAY	sly03030	7	50	0.00527192	0.0858388
Steroid biosynthesis	KEGG PATHWAY	sly00100	6	38	0.00572259	0.0858388
Base excision repair	KEGG PATHWAY	sly03410	6	42	0.00876987	0.112756
Cutin, suberine and wax biosynthesis	KEGG PATHWAY	sly00073	5	33	0.0131999	0.148499
Metabolic pathways	KEGG PATHWAY	sly01100	118	2483	0.0173398	0.173398
Protein processing in endoplasmic reticulum	KEGG PATHWAY	sly04141	15	226	0.0388859	0.349973
Pyrimidine metabolism	KEGG PATHWAY	sly00240	6	63	0.0445377	0.364399

## Sheet: Table S5-2
Term	Database	ID	Input number	Background number	P-Value	Corrected P-Value
Metabolic pathways	KEGG PATHWAY	sly01100	154	2483	2.75952e-07	1.65957e-05
Isoquinoline alkaloid biosynthesis	KEGG PATHWAY	sly00950	11	30	3.31913e-07	1.65957e-05
Photosynthesis - antenna proteins	KEGG PATHWAY	sly00196	10	26	8.01617e-07	2.67206e-05
Amino sugar and nucleotide sugar metabolism	KEGG PATHWAY	sly00520	20	134	2.59147e-06	6.47868e-05
Plant hormone signal transduction	KEGG PATHWAY	sly04075	31	300	7.34285e-06	0.000146857
Biosynthesis of secondary metabolites	KEGG PATHWAY	sly01110	84	1252	1.30309e-05	0.000217181
Tyrosine metabolism	KEGG PATHWAY	sly00350	11	52	2.9457e-05	0.000420814
Phenylalanine metabolism	KEGG PATHWAY	sly00360	11	59	8.06768e-05	0.00100846
Tropane, piperidine and pyridine alkaloid biosynthesis	KEGG PATHWAY	sly00960	6	34	0.00432048	0.0480053
MAPK signaling pathway - plant	KEGG PATHWAY	sly04016	16	185	0.00574886	0.0574886
Steroid biosynthesis	KEGG PATHWAY	sly00100	6	38	0.0069647	0.0633155
Alanine, aspartate and glutamate metabolism	KEGG PATHWAY	sly00250	7	55	0.0103412	0.086177
DNA replication	KEGG PATHWAY	sly03030	6	50	0.0216382	0.166448
Monoterpenoid biosynthesis	KEGG PATHWAY	sly00902	3	17	0.0412963	0.294974
