# Supplementary material for: Identification and Characterization of Long Non-coding RNA in Tomato Roots Under Salt Stress
Source: Front Plant Sci. 2022 Jul 4;13:834027. doi: 10.3389/fpls.2022.834027 (PMC9295719; doi:10.3389/fpls.2022.834027)
Supplement: Supplementary Table 6 — Trans-regulated lncRNA-mRNA pairs in M82 and S. pennellii. [file Table_6.XLSX]

## Sheet: Table S6-1
lncRNA ID	FoldChange	P-value	target gene ID	FoldChange	P-value	Correlation	P-value
Lnc_000001	1.33255	0.00133236	Solyc00g028760.1	1.80441	6.28e-06	0.995562	2.94992e-05
Lnc_000001	1.33255	0.00133236	Solyc01g009810.3	1.04096	0.000226017	0.992757	7.85104e-05
Lnc_000001	1.33255	0.00133236	Solyc01g010000.3	-1.88019	1.08e-18	-0.990493	0.000135134
Lnc_000001	1.33255	0.00133236	Solyc01g010350.3	-1.36461	5.48e-13	-0.990623	0.000131475
Lnc_000001	1.33255	0.00133236	Solyc01g014270.3	-1.29552	2.02e-14	0.990761	0.000127652
Lnc_000001	1.33255	0.00133236	Solyc01g073880.2	-1.23082	1.13e-14	-0.996631	1.70081e-05
Lnc_000001	1.33255	0.00133236	Solyc01g081620.3	-1.08879	2.37e-06	-0.995734	2.72615e-05
Lnc_000001	1.33255	0.00133236	Solyc01g090160.3	1.2514	4.54e-06	0.99307	7.18805e-05
Lnc_000001	1.33255	0.00133236	Solyc01g090310.2	1.2514	4.54e-06	-0.992466	8.49308e-05
Lnc_000001	1.33255	0.00133236	Solyc01g095770.3	-2.06226	6.71e-20	-0.997292	1.09869e-05
Lnc_000001	1.33255	0.00133236	Solyc01g097340.3	1.75038	2.01e-08	-0.993548	6.2306e-05
Lnc_000001	1.33255	0.00133236	Solyc01g097550.3	1.58851	2.33e-10	-0.990645	0.000130853
Lnc_000001	1.33255	0.00133236	Solyc01g101120.3	-1.20697	3.74e-10	0.996929	1.41312e-05
Lnc_000001	1.33255	0.00133236	Solyc01g104030.3	1.17129	1.81e-06	0.997459	9.67939e-06
Lnc_000001	1.33255	0.00133236	Solyc01g107190.3	1.4693	0.00033078	-0.99556	2.95213e-05
Lnc_000001	1.33255	0.00133236	Solyc01g108320.3	-1.49381	1.54e-21	-0.997366	1.03964e-05
Lnc_000001	1.33255	0.00133236	Solyc01g108860.3	-1.57558	1.48e-11	-0.996203	2.16028e-05
Lnc_000001	1.33255	0.00133236	Solyc02g032030.1	1.7069	1.03e-09	-0.997801	7.24954e-06
Lnc_000001	1.33255	0.00133236	Solyc02g032550.2	-1.27783	2.47e-08	-0.997737	7.67446e-06
Lnc_000001	1.33255	0.00133236	Solyc02g032560.2	-1.27783	2.47e-08	-0.997737	7.67446e-06
Lnc_000001	1.33255	0.00133236	Solyc02g032565.1	-1.27783	2.47e-08	-0.997737	7.67446e-06
Lnc_000001	1.33255	0.00133236	Solyc02g032580.2	-1.27783	2.47e-08	-0.997737	7.67446e-06
Lnc_000001	1.33255	0.00133236	Solyc02g033060.3	3.37157	5.07e-38	0.995792	2.65263e-05
Lnc_000001	1.33255	0.00133236	Solyc02g063350.1	-1.00383	2.66e-07	-0.998274	4.46348e-06
Lnc_000001	1.33255	0.00133236	Solyc02g064970.3	-2.96362	8.71e-32	-0.994934	3.84325e-05
Lnc_000001	1.33255	0.00133236	Solyc02g064980.1	-2.96362	8.71e-32	-0.995798	2.64511e-05
Lnc_000001	1.33255	0.00133236	Solyc02g070040.1	-1.43767	3.2e-12	-0.990633	0.000131195
Lnc_000001	1.33255	0.00133236	Solyc02g070050.3	-1.43767	3.2e-12	-0.990633	0.000131195
Lnc_000001	1.33255	0.00133236	Solyc02g077420.3	3.97473	2.09e-48	-0.994128	5.16277e-05
Lnc_000001	1.33255	0.00133236	Solyc02g077430.3	3.97473	2.09e-48	-0.994128	5.16277e-05
Lnc_000001	1.33255	0.00133236	Solyc02g078570.3	1.03848	0.0296656	-0.996254	2.10169e-05
Lnc_000001	1.33255	0.00133236	Solyc02g080790.3	-2.01596	0.000398827	-0.992645	8.09519e-05
Lnc_000001	1.33255	0.00133236	Solyc02g087920.3	3.59335	9.02e-60	0.99139	0.000110875
Lnc_000001	1.33255	0.00133236	Solyc02g091360.1	-1.29528	1.74e-08	0.991129	0.000117683
Lnc_000001	1.33255	0.00133236	Solyc02g092450.3	-1.023	9.32e-08	-0.995218	3.42417e-05
Lnc_000001	1.33255	0.00133236	Solyc02g092990.1	-1.21091	6.47e-08	-0.996142	2.22975e-05
Lnc_000001	1.33255	0.00133236	Solyc02g094110.1	-3.06761	2.03e-31	-0.99473	4.15828e-05
Lnc_000001	1.33255	0.00133236	Solyc03g005450.3	1.31089	3.93e-08	0.996411	1.93036e-05
Lnc_000001	1.33255	0.00133236	Solyc03g005890.1	-1.34707	1.28e-10	0.999059	1.3286e-06
Lnc_000001	1.33255	0.00133236	Solyc03g026270.3	-2.46878	2.68e-24	-0.993635	6.06488e-05
Lnc_000001	1.33255	0.00133236	Solyc03g026280.3	-2.44075	1.93e-24	-0.992039	9.48256e-05
Lnc_000001	1.33255	0.00133236	Solyc03g036470.2	1.19249	0.000374003	-0.99788	6.73393e-06
Lnc_000001	1.33255	0.00133236	Solyc03g036473.1	-1.41279	2.89e-11	-0.99788	6.73393e-06
Lnc_000001	1.33255	0.00133236	Solyc03g036480.2	-1.41279	2.89e-11	-0.99788	6.73393e-06
Lnc_000001	1.33255	0.00133236	Solyc03g044600.2	1.31016	2.38e-07	0.990748	0.000127996
Lnc_000001	1.33255	0.00133236	Solyc03g081230.1	-2.58236	3.37e-20	0.995163	3.50365e-05
Lnc_000001	1.33255	0.00133236	Solyc03g082530.1	-1.66414	9.27e-22	-0.996432	1.90685e-05
Lnc_000001	1.33255	0.00133236	Solyc03g090990.1	-2.16187	4.85e-10	-0.990649	0.000130757
Lnc_000001	1.33255	0.00133236	Solyc03g093650.3	-2.72352	4.04e-35	-0.994397	4.70069e-05
Lnc_000001	1.33255	0.00133236	Solyc03g096290.3	-2.83356	9.28e-25	-0.99177	0.000101321
Lnc_000001	1.33255	0.00133236	Solyc03g097440.3	1.23933	1.22e-06	0.994044	5.31012e-05
Lnc_000001	1.33255	0.00133236	Solyc03g112700.1	1.19528	0.000188674	-0.990263	0.000141744
Lnc_000001	1.33255	0.00133236	Solyc03g113280.3	-1.75708	6.83e-19	-0.993926	5.52332e-05
Lnc_000001	1.33255	0.00133236	Solyc03g113930.2	1.05644	0.00334383	0.990023	0.000148822
Lnc_000001	1.33255	0.00133236	Solyc03g116630.3	1.42669	1.22e-07	0.990794	0.000126742
Lnc_000001	1.33255	0.00133236	Solyc03g117610.1	-3.02206	7.7e-42	-0.994825	4.01006e-05
Lnc_000001	1.33255	0.00133236	Solyc03g118945.1	-1.19566	3.44e-06	-0.996081	2.30092e-05
Lnc_000001	1.33255	0.00133236	Solyc03g118947.1	-1.4076	3.47e-11	-0.996081	2.30092e-05
Lnc_000001	1.33255	0.00133236	Solyc03g118960.2	-1.4076	3.47e-11	-0.996081	2.30092e-05
Lnc_000001	1.33255	0.00133236	Solyc03g118970.3	-1.4076	3.47e-11	-0.996081	2.30092e-05
Lnc_000001	1.33255	0.00133236	Solyc03g119200.3	-2.07675	1.07e-19	-0.995475	3.06675e-05
Lnc_000001	1.33255	0.00133236	Solyc03g121360.1	-2.0482	3.65e-27	-0.990455	0.000136222
Lnc_000001	1.33255	0.00133236	Solyc03g124110.2	-1.01849	1.82e-09	-0.992039	9.48256e-05
Lnc_000001	1.33255	0.00133236	Solyc04g005070.3	-2.41827	6.62e-36	-0.999317	6.99569e-07
Lnc_000001	1.33255	0.00133236	Solyc04g007580.1	-2.47461	8.41e-24	-0.996739	1.59331e-05
Lnc_000001	1.33255	0.00133236	Solyc04g014310.1	2.74739	2.92e-28	0.993839	5.68274e-05
Lnc_000001	1.33255	0.00133236	Solyc04g018110.1	3.29278	9.49e-11	-0.990843	0.000125401
Lnc_000001	1.33255	0.00133236	Solyc04g071600.3	-1.09123	5.86e-08	0.996885	1.45385e-05
Lnc_000001	1.33255	0.00133236	Solyc04g071610.3	-1.09123	5.86e-08	0.996885	1.45385e-05
Lnc_000001	1.33255	0.00133236	Solyc04g072920.3	-1.19847	2.99e-08	-0.997262	1.12386e-05
Lnc_000001	1.33255	0.00133236	Solyc04g077100.3	-1.04208	3.66e-12	0.994018	5.35701e-05
Lnc_000001	1.33255	0.00133236	Solyc04g077110.3	-1.04208	3.66e-12	0.994018	5.35701e-05
Lnc_000001	1.33255	0.00133236	Solyc04g077980.1	-1.20766	5.08e-07	-0.997133	1.2318e-05
Lnc_000001	1.33255	0.00133236	Solyc04g078840.3	1.245	3.41e-10	0.993154	7.01314e-05
Lnc_000001	1.33255	0.00133236	Solyc04g082220.2	-2.10052	4.74e-18	-0.993518	6.28946e-05
Lnc_000001	1.33255	0.00133236	Solyc05g005540.3	1.22204	0.000190331	-0.997225	1.15413e-05
Lnc_000001	1.33255	0.00133236	Solyc05g013370.1	-1.86129	1.44e-14	-0.990099	0.000146574
Lnc_000001	1.33255	0.00133236	Solyc05g014250.3	1.15025	3.17e-06	0.990372	0.000138591
Lnc_000001	1.33255	0.00133236	Solyc05g048820.3	-1.19483	2.1e-09	-0.991729	0.000102326
Lnc_000001	1.33255	0.00133236	Solyc05g052860.3	1.33218	1e-05	0.992715	7.94075e-05
Lnc_000001	1.33255	0.00133236	Solyc05g052870.3	1.33218	1e-05	0.992715	7.94075e-05
Lnc_000001	1.33255	0.00133236	Solyc05g053010.1	1.70859	1.61e-10	-0.995799	2.64377e-05
Lnc_000001	1.33255	0.00133236	Solyc05g053520.3	1.70859	1.61e-10	-0.994133	5.15252e-05
Lnc_000001	1.33255	0.00133236	Solyc05g053965.1	1.4207	1.86e-05	-0.997351	1.0519e-05
Lnc_000001	1.33255	0.00133236	Solyc05g055680.3	-2.31349	4.26e-13	-0.994999	3.74489e-05
Lnc_000001	1.33255	0.00133236	Solyc06g006000.3	-1.32737	3.61e-05	0.99838	3.93221e-06
Lnc_000001	1.33255	0.00133236	Solyc06g008620.1	-1.19004	4.64e-09	0.991028	0.000120375
Lnc_000001	1.33255	0.00133236	Solyc06g011350.3	-2.7826	9.59e-27	-0.9959	2.51767e-05
Lnc_000001	1.33255	0.00133236	Solyc06g053950.2	-1.22521	7.46e-10	0.995383	3.19249e-05
Lnc_000001	1.33255	0.00133236	Solyc06g053960.3	-1.22521	7.46e-10	0.995383	3.19249e-05
Lnc_000001	1.33255	0.00133236	Solyc06g054130.1	-1.01634	7.81e-08	-0.99627	2.08469e-05
Lnc_000001	1.33255	0.00133236	Solyc06g060760.3	-2.79925	3.83e-25	-0.99684	1.49627e-05
Lnc_000001	1.33255	0.00133236	Solyc06g066710.1	-3.37155	5.67e-23	-0.991136	0.000117519
Lnc_000001	1.33255	0.00133236	Solyc06g067870.3	-3.37155	5.67e-23	-0.9939	5.57093e-05
Lnc_000001	1.33255	0.00133236	Solyc06g069400.3	-1.69649	1.04e-13	-0.992696	7.98308e-05
Lnc_000001	1.33255	0.00133236	Solyc06g074420.1	-2.32417	2.36e-19	-0.994038	5.32091e-05
Lnc_000001	1.33255	0.00133236	Solyc06g075220.1	1.13995	0.00181303	-0.992181	9.14653e-05
Lnc_000001	1.33255	0.00133236	Solyc06g075650.3	-1.48651	1.6e-14	-0.990441	0.000136623
Lnc_000001	1.33255	0.00133236	Solyc06g076470.3	-3.03056	4.53e-62	-0.99338	6.55845e-05
Lnc_000001	1.33255	0.00133236	Solyc06g083160.1	-2.27039	1.47e-23	-0.995669	2.80994e-05
Lnc_000001	1.33255	0.00133236	Solyc06g083910.3	-2.35825	1.69e-20	-0.990593	0.000132329
Lnc_000001	1.33255	0.00133236	Solyc06g084430.3	-2.35825	1.69e-20	-0.993395	6.52882e-05
Lnc_000001	1.33255	0.00133236	Solyc07g006230.1	1.08513	0.000131933	-0.990376	0.000138498
Lnc_000001	1.33255	0.00133236	Solyc07g006740.3	2.1468	2.56e-14	-0.99119	0.000116087
Lnc_000001	1.33255	0.00133236	Solyc07g007180.3	1.37795	2.44e-07	0.995252	3.37569e-05
Lnc_000001	1.33255	0.00133236	Solyc07g014680.3	1.16258	0.00034851	-0.995192	3.462e-05
Lnc_000001	1.33255	0.00133236	Solyc07g052310.1	-1.86121	5.93e-10	-0.990426	0.00013706
Lnc_000001	1.33255	0.00133236	Solyc07g056320.3	1.56497	1.04e-10	0.99458	4.39811e-05
Lnc_000001	1.33255	0.00133236	Solyc07g064820.1	-1.57099	6.92e-15	-0.990085	0.000146976
Lnc_000001	1.33255	0.00133236	Solyc08g007080.3	-1.17495	8.11e-11	-0.993336	6.64751e-05
Lnc_000001	1.33255	0.00133236	Solyc08g007830.1	-1.33289	1.19e-08	-0.995729	2.73178e-05
Lnc_000001	1.33255	0.00133236	Solyc08g007840.2	-1.33289	1.19e-08	-0.990773	0.000127319
Lnc_000001	1.33255	0.00133236	Solyc08g008050.3	-3.71565	9.05e-33	-0.997579	8.78695e-06
Lnc_000001	1.33255	0.00133236	Solyc08g014000.3	-1.53147	2.62e-11	-0.997186	1.18635e-05
Lnc_000001	1.33255	0.00133236	Solyc08g061010.3	-1.27761	5.93e-13	0.99145	0.000109352
Lnc_000001	1.33255	0.00133236	Solyc08g061230.3	-1.27761	5.93e-13	0.992748	7.87026e-05
Lnc_000001	1.33255	0.00133236	Solyc08g061240.2	-1.27761	5.93e-13	0.992748	7.87026e-05
Lnc_000001	1.33255	0.00133236	Solyc08g066880.3	1.90974	2.91e-10	-0.991548	0.000106856
Lnc_000001	1.33255	0.00133236	Solyc08g068630.3	-1.5875	1.7e-12	-0.994838	3.98991e-05
Lnc_000001	1.33255	0.00133236	Solyc08g074682.1	-1.00027	1.25e-08	-0.993149	7.02382e-05
Lnc_000001	1.33255	0.00133236	Solyc08g074683.1	-1.00027	1.25e-08	-0.993149	7.02382e-05
Lnc_000001	1.33255	0.00133236	Solyc08g075020.3	1.46551	1.17e-10	0.990689	0.000129634
Lnc_000001	1.33255	0.00133236	Solyc08g077300.3	1.66156	1.5e-08	0.991115	0.000118057
Lnc_000001	1.33255	0.00133236	Solyc08g078190.1	-1.22323	2.43e-09	-0.994461	4.59366e-05
Lnc_000001	1.33255	0.00133236	Solyc08g081190.3	-1.10504	3.33e-10	-0.996404	1.93776e-05
Lnc_000001	1.33255	0.00133236	Solyc08g081195.1	-1.10504	3.33e-10	-0.996404	1.93776e-05
Lnc_000001	1.33255	0.00133236	Solyc08g081200.3	-1.10504	3.33e-10	-0.996404	1.93776e-05
Lnc_000001	1.33255	0.00133236	Solyc09g005410.2	1.32542	0.00362247	-0.991313	0.000112861
Lnc_000001	1.33255	0.00133236	Solyc09g005420.3	1.32542	0.00362247	-0.991313	0.000112861
Lnc_000001	1.33255	0.00133236	Solyc09g007760.3	-1.43488	1.17e-12	-0.996792	1.5417e-05
Lnc_000001	1.33255	0.00133236	Solyc09g008910.2	-3.59548	1.21e-41	-0.993438	6.4442e-05
Lnc_000001	1.33255	0.00133236	Solyc09g011430.1	-1.32779	0.0001041	-0.990061	0.000147681
Lnc_000001	1.33255	0.00133236	Solyc09g011960.2	-1.3747	2.79e-11	-0.99231	8.84875e-05
Lnc_000001	1.33255	0.00133236	Solyc09g074890.1	-1.35355	2.28e-11	-0.993553	6.22059e-05
Lnc_000001	1.33255	0.00133236	Solyc09g075440.3	2.74658	2.97e-22	0.990219	0.000143043
Lnc_000001	1.33255	0.00133236	Solyc09g075445.1	2.74658	2.97e-22	0.990219	0.000143043
Lnc_000001	1.33255	0.00133236	Solyc09g082810.3	1.4506	3.55e-07	0.992963	7.40996e-05
Lnc_000001	1.33255	0.00133236	Solyc09g091270.2	-1.11468	3.12e-10	0.994169	5.08964e-05
Lnc_000001	1.33255	0.00133236	Solyc10g050890.2	-2.111	5.76e-19	-0.995037	3.68791e-05
Lnc_000001	1.33255	0.00133236	Solyc10g055760.2	-1.01811	1.97e-09	-0.993381	6.55807e-05
Lnc_000001	1.33255	0.00133236	Solyc10g074740.1	-1.78192	9.56e-16	-0.99715	1.21701e-05
Lnc_000001	1.33255	0.00133236	Solyc10g074830.1	-3.19803	9.81e-07	-0.994637	4.30624e-05
Lnc_000001	1.33255	0.00133236	Solyc10g075100.2	1.96836	5.32e-11	0.997665	8.17128e-06
Lnc_000001	1.33255	0.00133236	Solyc10g078550.3	-1.46818	5.34e-12	-0.990556	0.000133374
Lnc_000001	1.33255	0.00133236	Solyc10g081520.1	-1.01846	6.79e-08	0.992604	8.18522e-05
Lnc_000001	1.33255	0.00133236	Solyc10g084120.2	-3.26023	4.27e-35	-0.996786	1.54809e-05
Lnc_000001	1.33255	0.00133236	Solyc10g085140.1	1.13149	4.86e-06	0.990802	0.000126505
Lnc_000001	1.33255	0.00133236	Solyc11g007730.2	-1.45377	1.19e-12	-0.997556	8.9553e-06
Lnc_000001	1.33255	0.00133236	Solyc11g008020.2	1.09131	2.44e-05	0.9933	6.71791e-05
Lnc_000001	1.33255	0.00133236	Solyc11g008030.2	1.09131	2.44e-05	0.9933	6.71791e-05
Lnc_000001	1.33255	0.00133236	Solyc11g012320.2	-2.17984	3.61e-22	-0.992282	8.91265e-05
Lnc_000001	1.33255	0.00133236	Solyc11g020230.1	-2.78955	1.06e-32	-0.990632	0.00013123
Lnc_000001	1.33255	0.00133236	Solyc11g042580.1	-1.047	0.000122637	-0.994711	4.18868e-05
Lnc_000001	1.33255	0.00133236	Solyc11g056650.2	1.70597	4.46e-14	0.995937	2.47267e-05
Lnc_000001	1.33255	0.00133236	Solyc11g068950.2	1.11374	1.24e-05	0.997095	1.26486e-05
Lnc_000001	1.33255	0.00133236	Solyc12g005790.2	1.58661	0.00244183	-0.995991	2.40737e-05
Lnc_000001	1.33255	0.00133236	Solyc12g005810.1	1.58661	0.00244183	-0.992278	8.92073e-05
Lnc_000001	1.33255	0.00133236	Solyc12g014620.2	1.57397	2.88e-10	-0.99702	1.33077e-05
Lnc_000001	1.33255	0.00133236	Solyc12g014630.1	1.57397	2.88e-10	-0.99702	1.33077e-05
Lnc_000001	1.33255	0.00133236	Solyc12g027540.2	1.59516	3.56e-11	0.990276	0.000141378
Lnc_000001	1.33255	0.00133236	Solyc12g044420.1	-2.3422	3.69e-42	0.992355	8.74561e-05
Lnc_000001	1.33255	0.00133236	Solyc12g088360.2	2.79215	2.19e-30	-0.9941	5.21149e-05
Lnc_000001	1.33255	0.00133236	Solyc12g088760.1	2.79215	2.19e-30	-0.992254	8.97756e-05
Lnc_000001	1.33255	0.00133236	Solyc12g096770.1	-1.72059	6.06e-10	-0.999051	1.35173e-06
Lnc_000001	1.33255	0.00133236	Solyc12g096780.2	-1.72059	6.06e-10	-0.99437	4.74621e-05
Lnc_000029	2.04886	0.0458536	Solyc02g085630.3	-1.2693	3.68e-12	0.995859	2.56829e-05
Lnc_000029	2.04886	0.0458536	Solyc04g016230.3	1.31452	0.000282498	0.995669	2.80899e-05
Lnc_000029	2.04886	0.0458536	Solyc06g072530.3	1.24694	0.00155597	0.99508	3.62462e-05
Lnc_000029	2.04886	0.0458536	Solyc11g056260.1	-1.047	0.000122637	0.99954	3.1783e-07
Lnc_000040	2.05651	0.0303573	Solyc06g069040.3	-1.14636	3.96e-09	0.992119	9.2932e-05
Lnc_000040	2.05651	0.0303573	Solyc11g056260.1	-1.047	0.000122637	0.990075	0.000147276
Lnc_000099	3.38381	0.0235359	Solyc01g097280.2	1.75038	2.01e-08	0.990568	0.000133038
Lnc_000099	3.38381	0.0235359	Solyc02g068470.1	-1.15838	4.92e-11	0.995363	3.21964e-05
Lnc_000099	3.38381	0.0235359	Solyc02g085260.1	1.29615	0.000811824	0.990445	0.000136524
Lnc_000099	3.38381	0.0235359	Solyc04g076440.1	2.1599	3.06e-06	0.993588	6.15351e-05
Lnc_000099	3.38381	0.0235359	Solyc05g010517.1	1.74298	0.000460738	0.994906	3.88616e-05
Lnc_000099	3.38381	0.0235359	Solyc05g053600.3	1.4207	1.86e-05	0.990393	0.000137989
Lnc_000099	3.38381	0.0235359	Solyc06g072530.3	1.24694	0.00155597	0.995299	3.30926e-05
Lnc_000099	3.38381	0.0235359	Solyc10g052540.1	-1.09412	4.37e-11	0.994149	5.12545e-05
Lnc_000099	3.38381	0.0235359	Solyc10g078780.2	1.04578	0.00195692	0.992215	9.06771e-05
Lnc_000101	1.10473	0.0039181	Solyc00g178340.2	1.38661	1.03e-05	-0.997042	1.31151e-05
Lnc_000101	1.10473	0.0039181	Solyc01g079110.3	-1.23082	1.13e-14	-0.990971	0.000121925
Lnc_000101	1.10473	0.0039181	Solyc01g080600.3	-1.08879	2.37e-06	-0.992105	9.3251e-05
Lnc_000101	1.10473	0.0039181	Solyc02g087920.3	3.59335	9.02e-60	0.992475	8.47167e-05
Lnc_000101	1.10473	0.0039181	Solyc03g025350.3	-1.0856	6.86e-07	-0.996123	2.2518e-05
Lnc_000101	1.10473	0.0039181	Solyc04g014770.1	3.37794	3.51e-58	-0.99359	6.14925e-05
Lnc_000101	1.10473	0.0039181	Solyc04g051470.1	-1.10683	1.6e-05	-0.991941	9.71699e-05
Lnc_000101	1.10473	0.0039181	Solyc04g082690.1	-1.48235	1.68e-09	-0.999447	4.58535e-07
Lnc_000101	1.10473	0.0039181	Solyc06g062390.3	-1.19673	2.43e-12	-0.990302	0.000140628
Lnc_000101	1.10473	0.0039181	Solyc06g083030.3	-1.46244	3.46e-09	-0.997721	7.78193e-06
Lnc_000101	1.10473	0.0039181	Solyc06g083040.3	-1.46244	3.46e-09	-0.997721	7.78193e-06
Lnc_000101	1.10473	0.0039181	Solyc06g083050.3	-1.46244	3.46e-09	-0.997721	7.78193e-06
Lnc_000101	1.10473	0.0039181	Solyc07g006230.1	1.08513	0.000131933	-0.990507	0.000134746
Lnc_000101	1.10473	0.0039181	Solyc07g009435.1	-1.17811	2.13e-05	-0.992624	8.14089e-05
Lnc_000101	1.10473	0.0039181	Solyc07g021640.2	2.20933	3.43e-23	0.990514	0.000134552
Lnc_000101	1.10473	0.0039181	Solyc07g021650.2	2.20933	3.43e-23	0.990514	0.000134552
Lnc_000101	1.10473	0.0039181	Solyc07g052670.3	-1.21778	5.66e-08	-0.990597	0.000132203
Lnc_000101	1.10473	0.0039181	Solyc08g006100.3	-1.24579	6.94e-07	-0.99775	7.5851e-06
Lnc_000101	1.10473	0.0039181	Solyc12g013510.1	-1.02021	1.02e-05	-0.996725	1.60711e-05
Lnc_000101	1.10473	0.0039181	Solyc12g013520.2	-1.02021	1.02e-05	-0.996725	1.60711e-05
Lnc_000101	1.10473	0.0039181	Solyc12g056220.2	-1.34277	3.96e-10	-0.995823	2.61364e-05
Lnc_000103	1.16311	0.0192619	Solyc01g015290.1	-1.09391	1.67e-10	0.99035	0.000139234
Lnc_000103	1.16311	0.0192619	Solyc01g107820.2	1.39793	3.5e-05	0.990561	0.000133215
Lnc_000103	1.16311	0.0192619	Solyc01g109920.2	-1.1115	4.52e-10	0.995129	3.55255e-05
Lnc_000103	1.16311	0.0192619	Solyc02g037495.1	1.339	2.82e-06	0.990585	0.000132542
Lnc_000103	1.16311	0.0192619	Solyc02g062710.1	1.84805	1.82e-08	0.991056	0.000119645
Lnc_000103	1.16311	0.0192619	Solyc02g085260.1	1.29615	0.000811824	0.993317	6.68483e-05
Lnc_000103	1.16311	0.0192619	Solyc02g088180.3	-1.35372	1.77e-12	0.991928	9.7478e-05
Lnc_000103	1.16311	0.0192619	Solyc02g092860.3	1.68213	2.11e-05	0.992174	9.16234e-05
Lnc_000103	1.16311	0.0192619	Solyc03g006490.3	1.49018	1.96e-06	0.996584	1.74851e-05
Lnc_000103	1.16311	0.0192619	Solyc03g033840.3	-1.15851	3.16e-11	0.995401	3.16835e-05
Lnc_000103	1.16311	0.0192619	Solyc03g044960.2	1.31016	2.38e-07	0.991115	0.000118057
Lnc_000103	1.16311	0.0192619	Solyc05g015490.3	1.5945	1.62e-05	0.993974	5.43632e-05
Lnc_000103	1.16311	0.0192619	Solyc05g023980.2	2.99782	2.94e-22	0.992269	8.9433e-05
Lnc_000103	1.16311	0.0192619	Solyc05g052670.1	-2.01608	2.25e-21	0.991309	0.00011296
Lnc_000103	1.16311	0.0192619	Solyc05g052680.1	1.33218	1e-05	0.991309	0.00011296
Lnc_000103	1.16311	0.0192619	Solyc05g056180.1	-1.01168	1.93e-09	0.996939	1.40399e-05
Lnc_000103	1.16311	0.0192619	Solyc06g009000.1	-1.66822	5.22e-12	0.996383	1.9599e-05
Lnc_000103	1.16311	0.0192619	Solyc06g061110.2	1.03183	0.0123672	0.993739	5.86779e-05
Lnc_000103	1.16311	0.0192619	Solyc06g069040.3	-1.14636	3.96e-09	0.994531	4.47756e-05
Lnc_000103	1.16311	0.0192619	Solyc06g072530.3	1.24694	0.00155597	0.990859	0.000124961
Lnc_000103	1.16311	0.0192619	Solyc07g049200.3	-1.64279	5.81e-14	0.993992	5.40442e-05
Lnc_000103	1.16311	0.0192619	Solyc07g056670.3	1.06086	0.000247842	0.992481	8.4597e-05
Lnc_000103	1.16311	0.0192619	Solyc07g063850.3	1.77584	1.37e-07	0.994262	4.92846e-05
Lnc_000103	1.16311	0.0192619	Solyc08g068850.3	-1.5875	1.7e-12	0.993207	6.90563e-05
Lnc_000103	1.16311	0.0192619	Solyc09g065540.3	1.20604	6.19e-05	0.99385	5.66093e-05
Lnc_000103	1.16311	0.0192619	Solyc10g052540.1	-1.09412	4.37e-11	0.993758	5.83298e-05
Lnc_000103	1.16311	0.0192619	Solyc11g006360.1	1.23664	1.95e-06	0.9921	9.33769e-05
Lnc_000103	1.16311	0.0192619	Solyc12g008850.2	1.08885	1.98e-06	0.990524	0.000134274
Lnc_000112	2.13334	2.03e-05	Solyc03g033250.1	1.14478	0.0123738	0.990625	0.000131424
Lnc_000112	2.13334	2.03e-05	Solyc03g033280.1	1.14478	0.0123738	0.990625	0.000131424
Lnc_000112	2.13334	2.03e-05	Solyc03g033290.1	1.14478	0.0123738	0.990625	0.000131424
Lnc_000112	2.13334	2.03e-05	Solyc03g097390.3	2.72613	6.66e-23	0.990704	0.00012921
Lnc_000112	2.13334	2.03e-05	Solyc03g097585.1	2.8489	2.01e-30	0.99623	2.12878e-05
Lnc_000112	2.13334	2.03e-05	Solyc03g097590.3	2.8489	2.01e-30	0.99623	2.12878e-05
Lnc_000112	2.13334	2.03e-05	Solyc03g097600.3	2.8489	2.01e-30	0.99623	2.12878e-05
Lnc_000112	2.13334	2.03e-05	Solyc03g097610.3	2.8489	2.01e-30	0.99623	2.12878e-05
Lnc_000112	2.13334	2.03e-05	Solyc03g097620.1	2.8489	2.01e-30	0.99623	2.12878e-05
Lnc_000112	2.13334	2.03e-05	Solyc05g010330.3	1.82641	2.67e-10	0.994143	5.13508e-05
Lnc_000112	2.13334	2.03e-05	Solyc06g074390.3	-2.32417	2.36e-19	0.992643	8.0991e-05
Lnc_000112	2.13334	2.03e-05	Solyc06g076800.3	-1.54368	4.49e-12	0.99503	3.69951e-05
Lnc_000112	2.13334	2.03e-05	Solyc08g008610.3	1.0496	0.0001432	0.990175	0.00014431
Lnc_000112	2.13334	2.03e-05	Solyc08g066635.1	1.90974	2.91e-10	0.99579	2.65539e-05
Lnc_000112	2.13334	2.03e-05	Solyc08g078030.3	3.00511	8.36e-36	0.995138	3.54066e-05
Lnc_000112	2.13334	2.03e-05	Solyc09g005970.1	1.51421	2.09e-07	0.997223	1.15546e-05
Lnc_000112	2.13334	2.03e-05	Solyc10g008810.3	2.94496	2.11e-41	0.996014	2.38016e-05
Lnc_000112	2.13334	2.03e-05	Solyc10g080380.1	1.05366	0.0477393	0.990392	0.000138034
Lnc_000112	2.13334	2.03e-05	Solyc11g011110.2	-1.40893	1.92e-15	0.995235	3.40092e-05
Lnc_000112	2.13334	2.03e-05	Solyc11g066700.2	2.02564	2.12e-11	0.992946	7.44554e-05
Lnc_000112	2.13334	2.03e-05	Solyc12g096980.2	1.47666	3.04e-05	0.990417	0.0001373
Lnc_000138	3.66108	3.54e-08	Solyc01g006530.1	3.36908	1.39e-39	0.994709	4.19139e-05
Lnc_000138	3.66108	3.54e-08	Solyc01g008070.3	-1.90874	2.86e-11	0.991568	0.000106348
Lnc_000138	3.66108	3.54e-08	Solyc01g009670.3	1.04096	0.000226017	0.999039	1.3838e-06
Lnc_000138	3.66108	3.54e-08	Solyc01g015290.1	-1.09391	1.67e-10	0.996386	1.95728e-05
Lnc_000138	3.66108	3.54e-08	Solyc01g060240.3	2.23441	4.86e-14	0.995209	3.43797e-05
Lnc_000138	3.66108	3.54e-08	Solyc01g066450.3	-1.11697	4.37e-10	0.990718	0.000128829
Lnc_000138	3.66108	3.54e-08	Solyc01g066700.3	2.51099	1.69e-16	0.996488	1.84822e-05
Lnc_000138	3.66108	3.54e-08	Solyc01g066710.3	2.51099	1.69e-16	0.996488	1.84822e-05
Lnc_000138	3.66108	3.54e-08	Solyc01g079900.1	2.32719	1.2e-18	0.994922	3.86184e-05
Lnc_000138	3.66108	3.54e-08	Solyc01g079940.3	2.32719	1.2e-18	0.994922	3.86184e-05
Lnc_000138	3.66108	3.54e-08	Solyc01g079950.3	2.32719	1.2e-18	0.994922	3.86184e-05
Lnc_000138	3.66108	3.54e-08	Solyc01g080010.2	1.88251	1.02e-09	0.99834	4.12916e-06
Lnc_000138	3.66108	3.54e-08	Solyc01g086670.3	2.10602	3.87e-12	0.999473	4.17148e-07
Lnc_000138	3.66108	3.54e-08	Solyc01g086680.3	2.10602	3.87e-12	0.995634	2.85482e-05
Lnc_000138	3.66108	3.54e-08	Solyc01g086730.3	-1.31888	4.66e-09	0.992532	8.34594e-05
Lnc_000138	3.66108	3.54e-08	Solyc01g091250.3	2.00613	5.18e-13	0.994353	4.7737e-05
Lnc_000138	3.66108	3.54e-08	Solyc01g098730.2	1.8075	3.24e-10	0.997422	9.9629e-06
Lnc_000138	3.66108	3.54e-08	Solyc01g100370.3	-1.1022	2.32e-10	0.995368	3.21378e-05
Lnc_000138	3.66108	3.54e-08	Solyc01g100460.3	-1.06717	2.76e-09	0.992081	9.38182e-05
Lnc_000138	3.66108	3.54e-08	Solyc01g100480.3	-1.06717	2.76e-09	0.992081	9.38182e-05
Lnc_000138	3.66108	3.54e-08	Solyc01g102890.3	1.0793	0.00345247	0.993727	5.89033e-05
Lnc_000138	3.66108	3.54e-08	Solyc01g104740.3	1.2815	0.000118193	0.99127	0.000113999
Lnc_000138	3.66108	3.54e-08	Solyc01g105360.3	1.27155	0.000335741	0.991661	0.000104016
Lnc_000138	3.66108	3.54e-08	Solyc01g105370.3	1.27155	0.000335741	0.991661	0.000104016
Lnc_000138	3.66108	3.54e-08	Solyc01g105390.3	1.27155	0.000335741	0.991661	0.000104016
Lnc_000138	3.66108	3.54e-08	Solyc01g107080.3	1.40932	4.12e-05	0.998005	5.96675e-06
Lnc_000138	3.66108	3.54e-08	Solyc01g107100.3	1.4693	0.00033078	0.996308	2.04183e-05
Lnc_000138	3.66108	3.54e-08	Solyc01g107820.2	1.39793	3.5e-05	0.992649	8.08557e-05
Lnc_000138	3.66108	3.54e-08	Solyc01g107830.3	2.99972	1.06e-26	0.999098	1.22013e-06
Lnc_000138	3.66108	3.54e-08	Solyc01g108900.3	2.45726	2.27e-21	0.998235	4.67234e-06
Lnc_000138	3.66108	3.54e-08	Solyc01g109170.3	1.15617	0.00038355	0.994232	4.98172e-05
Lnc_000138	3.66108	3.54e-08	Solyc01g109920.2	-1.1115	4.52e-10	0.992583	8.23106e-05
Lnc_000138	3.66108	3.54e-08	Solyc01g110510.3	-1.46971	1.59e-11	0.998691	2.56782e-06
Lnc_000138	3.66108	3.54e-08	Solyc02g032820.3	3.37157	5.07e-38	0.993305	6.70746e-05
Lnc_000138	3.66108	3.54e-08	Solyc02g037495.1	1.339	2.82e-06	0.996315	2.03395e-05
Lnc_000138	3.66108	3.54e-08	Solyc02g061770.3	2.839	1.06e-16	0.99657	1.76226e-05
Lnc_000138	3.66108	3.54e-08	Solyc02g062710.1	1.84805	1.82e-08	0.990029	0.000148635
Lnc_000138	3.66108	3.54e-08	Solyc02g064720.3	-2.2644	6.96e-26	0.991899	9.8166e-05
Lnc_000138	3.66108	3.54e-08	Solyc02g065740.3	-1.61579	2.63e-13	-0.990114	0.000146131
Lnc_000138	3.66108	3.54e-08	Solyc02g067230.3	-1.61579	2.63e-13	0.991481	0.000108562
Lnc_000138	3.66108	3.54e-08	Solyc02g067440.3	-1.45694	1.3e-08	0.990874	0.000124534
Lnc_000138	3.66108	3.54e-08	Solyc02g070090.1	-1.43767	3.2e-12	0.997178	1.19349e-05
Lnc_000138	3.66108	3.54e-08	Solyc02g071970.1	2.07583	1.01e-16	0.992214	9.07041e-05
Lnc_000138	3.66108	3.54e-08	Solyc02g077070.3	-2.31049	1.25e-19	0.996806	1.52906e-05
Lnc_000138	3.66108	3.54e-08	Solyc02g079230.3	-1.25797	8.91e-10	0.995154	3.51635e-05
Lnc_000138	3.66108	3.54e-08	Solyc02g079530.3	-3.92685	1.36e-86	0.99866	2.69254e-06
Lnc_000138	3.66108	3.54e-08	Solyc02g079533.1	-3.92685	1.36e-86	0.99866	2.69254e-06
Lnc_000138	3.66108	3.54e-08	Solyc02g079540.2	1.48859	1.87e-09	0.99866	2.69254e-06
Lnc_000138	3.66108	3.54e-08	Solyc02g079550.2	1.48859	1.87e-09	0.99866	2.69254e-06
Lnc_000138	3.66108	3.54e-08	Solyc02g080920.2	-2.53514	2.11e-29	0.992143	9.23485e-05
Lnc_000138	3.66108	3.54e-08	Solyc02g080930.2	-2.53514	2.11e-29	0.995993	2.40485e-05
Lnc_000138	3.66108	3.54e-08	Solyc02g082890.1	-1.52425	1.5e-07	0.990722	0.000128711
Lnc_000138	3.66108	3.54e-08	Solyc02g082910.3	-1.52425	1.5e-07	0.991763	0.000101481
Lnc_000138	3.66108	3.54e-08	Solyc02g082920.3	3.42701	6.17e-30	0.998751	2.33757e-06
Lnc_000138	3.66108	3.54e-08	Solyc02g083730.3	-2.46881	5.11e-23	0.993248	6.82353e-05
Lnc_000138	3.66108	3.54e-08	Solyc02g084850.3	4.08528	4.59e-42	0.99862	2.8554e-06
Lnc_000138	3.66108	3.54e-08	Solyc02g086530.3	1.9498	9.16e-16	0.995606	2.89151e-05
Lnc_000138	3.66108	3.54e-08	Solyc02g088180.3	-1.35372	1.77e-12	0.997998	6.00792e-06
Lnc_000138	3.66108	3.54e-08	Solyc02g088560.3	1.40005	3.77e-09	0.998505	3.35168e-06
Lnc_000138	3.66108	3.54e-08	Solyc02g089150.3	-1.14732	2.9e-09	0.999122	1.15485e-06
Lnc_000138	3.66108	3.54e-08	Solyc02g089190.2	-1.14732	2.9e-09	0.992996	7.34173e-05
Lnc_000138	3.66108	3.54e-08	Solyc02g093050.3	-1.21091	6.47e-08	0.997371	1.03546e-05
Lnc_000138	3.66108	3.54e-08	Solyc03g005910.3	2.28991	1.25e-15	0.996087	2.29384e-05
Lnc_000138	3.66108	3.54e-08	Solyc03g006360.3	2.78324	5.62e-27	0.992364	8.72321e-05
Lnc_000138	3.66108	3.54e-08	Solyc03g006490.3	1.49018	1.96e-06	0.991602	0.000105487
Lnc_000138	3.66108	3.54e-08	Solyc03g031450.3	-1.70108	1.76e-18	0.999	1.49841e-06
Lnc_000138	3.66108	3.54e-08	Solyc03g031520.3	-1.70108	1.76e-18	0.991691	0.000103262
Lnc_000138	3.66108	3.54e-08	Solyc03g031890.3	1.09198	3.45e-06	0.992225	9.04329e-05
Lnc_000138	3.66108	3.54e-08	Solyc03g033840.3	-1.15851	3.16e-11	0.991925	9.75477e-05
Lnc_000138	3.66108	3.54e-08	Solyc03g043880.3	1.58354	1.14e-08	0.992758	7.84853e-05
Lnc_000138	3.66108	3.54e-08	Solyc03g043900.1	1.58354	1.14e-08	0.995204	3.44496e-05
Lnc_000138	3.66108	3.54e-08	Solyc03g044960.2	1.31016	2.38e-07	0.997568	8.8641e-06
Lnc_000138	3.66108	3.54e-08	Solyc03g065250.3	-2.09744	7.41e-28	0.999192	9.78848e-07
Lnc_000138	3.66108	3.54e-08	Solyc03g082640.2	1.0487	0.00814196	0.998512	3.32026e-06
Lnc_000138	3.66108	3.54e-08	Solyc03g094120.3	-1.12996	5.85e-08	0.992816	7.72389e-05
Lnc_000138	3.66108	3.54e-08	Solyc03g096200.1	1.23695	0.00101168	0.99112	0.000117923
Lnc_000138	3.66108	3.54e-08	Solyc03g097560.3	2.8489	2.01e-30	-0.990914	0.000123455
Lnc_000138	3.66108	3.54e-08	Solyc03g097570.3	2.8489	2.01e-30	-0.990914	0.000123455
Lnc_000138	3.66108	3.54e-08	Solyc03g097580.3	2.8489	2.01e-30	-0.990914	0.000123455
Lnc_000138	3.66108	3.54e-08	Solyc03g098740.1	2.70376	1.91e-34	0.996216	2.14496e-05
Lnc_000138	3.66108	3.54e-08	Solyc03g111720.3	1.50817	6.82e-06	0.99396	5.46207e-05
Lnc_000138	3.66108	3.54e-08	Solyc03g112080.1	1.19528	0.000188674	0.998803	2.14706e-06
Lnc_000138	3.66108	3.54e-08	Solyc03g116480.1	2.09092	2.1e-13	0.999379	5.77782e-07
Lnc_000138	3.66108	3.54e-08	Solyc03g117675.1	-3.02206	7.7e-42	0.999031	1.40929e-06
Lnc_000138	3.66108	3.54e-08	Solyc03g119300.3	-1.99207	1.41e-22	0.9935	6.32308e-05
Lnc_000138	3.66108	3.54e-08	Solyc03g119305.1	-1.99207	1.41e-22	0.9935	6.32308e-05
Lnc_000138	3.66108	3.54e-08	Solyc04g005410.2	1.31045	2.33e-16	0.998297	4.34732e-06
Lnc_000138	3.66108	3.54e-08	Solyc04g006983.1	1.29098	0.000238738	0.990151	0.00014504
Lnc_000138	3.66108	3.54e-08	Solyc04g007000.1	2.34038	7.04e-18	0.9965	1.83512e-05
Lnc_000138	3.66108	3.54e-08	Solyc04g011340.3	-1.14139	5.56e-13	0.993235	6.84903e-05
Lnc_000138	3.66108	3.54e-08	Solyc04g011450.2	1.36813	0.0308824	0.996488	1.84776e-05
Lnc_000138	3.66108	3.54e-08	Solyc04g011750.3	-1.21042	7.65e-12	0.997252	1.13172e-05
Lnc_000138	3.66108	3.54e-08	Solyc04g011800.1	1.13156	0.00593237	0.997172	1.19823e-05
Lnc_000138	3.66108	3.54e-08	Solyc04g016470.3	2.03824	2.13e-27	0.9974	1.01319e-05
Lnc_000138	3.66108	3.54e-08	Solyc04g054340.1	1.21783	0.00208715	0.996811	1.52422e-05
Lnc_000138	3.66108	3.54e-08	Solyc04g071770.3	-1.09123	5.86e-08	0.998411	3.78633e-06
Lnc_000138	3.66108	3.54e-08	Solyc04g072000.3	1.19957	0.00387709	0.990144	0.000145242
Lnc_000138	3.66108	3.54e-08	Solyc04g072280.3	1.19957	0.00387709	0.998968	1.5961e-06
Lnc_000138	3.66108	3.54e-08	Solyc04g080530.3	1.05899	0.00120108	0.996976	1.37065e-05
Lnc_000138	3.66108	3.54e-08	Solyc04g081960.1	2.03811	7.69e-12	0.998244	4.6217e-06
Lnc_000138	3.66108	3.54e-08	Solyc05g008910.3	1.84223	5.62e-16	0.999278	7.82122e-07
Lnc_000138	3.66108	3.54e-08	Solyc05g010390.1	1.74298	0.000460738	0.999282	7.74087e-07
Lnc_000138	3.66108	3.54e-08	Solyc05g013530.3	2.02761	6.31e-36	0.992834	7.68415e-05
Lnc_000138	3.66108	3.54e-08	Solyc05g014300.1	4.21093	8.96e-37	0.996656	1.67566e-05
Lnc_000138	3.66108	3.54e-08	Solyc05g015490.3	1.5945	1.62e-05	0.992229	9.03576e-05
Lnc_000138	3.66108	3.54e-08	Solyc05g015850.3	-1.73423	6.94e-26	0.99061	0.000131837
Lnc_000138	3.66108	3.54e-08	Solyc05g023980.2	2.99782	2.94e-22	0.992888	7.56885e-05
Lnc_000138	3.66108	3.54e-08	Solyc05g025890.2	-1.08778	1.26e-07	0.990051	0.000147971
Lnc_000138	3.66108	3.54e-08	Solyc05g039950.2	-1.08778	1.26e-07	0.992679	8.01999e-05
Lnc_000138	3.66108	3.54e-08	Solyc05g041200.3	-1.08778	1.26e-07	0.994878	3.92858e-05
Lnc_000138	3.66108	3.54e-08	Solyc05g050240.3	1.43211	1.65e-05	0.994831	4.00118e-05
Lnc_000138	3.66108	3.54e-08	Solyc05g051900.3	1.18472	0.000101436	0.993884	5.59959e-05
Lnc_000138	3.66108	3.54e-08	Solyc05g052410.2	-1.099	2.62e-15	0.997515	9.25886e-06
Lnc_000138	3.66108	3.54e-08	Solyc05g052670.1	-2.01608	2.25e-21	0.998087	5.4885e-06
Lnc_000138	3.66108	3.54e-08	Solyc05g052680.1	1.33218	1e-05	0.998087	5.4885e-06
Lnc_000138	3.66108	3.54e-08	Solyc05g053330.3	1.70859	1.61e-10	0.991686	0.000103393
Lnc_000138	3.66108	3.54e-08	Solyc06g009000.1	-1.66822	5.22e-12	0.990307	0.000140487
Lnc_000138	3.66108	3.54e-08	Solyc06g010060.1	1.25383	3.33e-06	0.990779	0.000127141
Lnc_000138	3.66108	3.54e-08	Solyc06g036130.3	-2.15304	7.8e-31	0.996417	1.92351e-05
Lnc_000138	3.66108	3.54e-08	Solyc06g053260.1	3.53881	2.33e-24	0.996989	1.35841e-05
Lnc_000138	3.66108	3.54e-08	Solyc06g053700.1	2.1506	7.94e-12	0.997454	9.7181e-06
Lnc_000138	3.66108	3.54e-08	Solyc06g063280.1	1.13375	0.00153267	0.995895	2.52384e-05
Lnc_000138	3.66108	3.54e-08	Solyc06g066360.2	-1.01497	3.03e-09	0.996115	2.26121e-05
Lnc_000138	3.66108	3.54e-08	Solyc06g068160.3	1.76355	2.44e-05	0.996544	1.78938e-05
Lnc_000138	3.66108	3.54e-08	Solyc06g068170.2	1.76355	2.44e-05	0.996544	1.78938e-05
Lnc_000138	3.66108	3.54e-08	Solyc06g071890.3	2.18387	1e-15	0.995267	3.35451e-05
Lnc_000138	3.66108	3.54e-08	Solyc06g072210.1	3.9949	2.11e-73	0.991366	0.000111495
Lnc_000138	3.66108	3.54e-08	Solyc06g083590.3	1.22372	5.57e-08	0.991761	0.000101554
Lnc_000138	3.66108	3.54e-08	Solyc06g083595.1	1.22372	5.57e-08	0.991761	0.000101554
Lnc_000138	3.66108	3.54e-08	Solyc07g006500.3	2.0694	3.41e-10	0.995939	2.47081e-05
Lnc_000138	3.66108	3.54e-08	Solyc07g008710.3	1.83831	2.63e-08	-0.990339	0.000139549
Lnc_000138	3.66108	3.54e-08	Solyc07g017610.3	1.03269	0.0225047	0.990149	0.000145094
Lnc_000138	3.66108	3.54e-08	Solyc07g043310.3	-1.63569	7.85e-19	0.996375	1.96876e-05
Lnc_000138	3.66108	3.54e-08	Solyc07g052120.3	2.39714	4.93e-11	0.994035	5.32647e-05
Lnc_000138	3.66108	3.54e-08	Solyc07g055670.1	1.22046	0.00225679	0.992637	8.11141e-05
Lnc_000138	3.66108	3.54e-08	Solyc07g055690.1	1.22046	0.00225679	0.992637	8.11141e-05
Lnc_000138	3.66108	3.54e-08	Solyc07g056360.1	1.23501	1.58e-05	-0.991214	0.000115465
Lnc_000138	3.66108	3.54e-08	Solyc07g056390.3	1.09449	0.000592433	0.990645	0.000130854
Lnc_000138	3.66108	3.54e-08	Solyc07g056670.3	1.06086	0.000247842	0.992509	8.39664e-05
Lnc_000138	3.66108	3.54e-08	Solyc07g061720.3	5.30199	2.95e-98	0.994342	4.79245e-05
Lnc_000138	3.66108	3.54e-08	Solyc07g062480.1	2.3671	6e-19	0.990205	0.000143432
Lnc_000138	3.66108	3.54e-08	Solyc07g062490.1	2.3671	6e-19	0.995703	2.76605e-05
Lnc_000138	3.66108	3.54e-08	Solyc07g063410.3	-1.35171	9.1e-16	0.994072	5.26063e-05
Lnc_000138	3.66108	3.54e-08	Solyc07g063700.2	1.77584	1.37e-07	0.99663	1.70189e-05
Lnc_000138	3.66108	3.54e-08	Solyc07g063710.2	1.77584	1.37e-07	0.99663	1.70189e-05
Lnc_000138	3.66108	3.54e-08	Solyc07g063850.3	1.77584	1.37e-07	0.996147	2.22443e-05
Lnc_000138	3.66108	3.54e-08	Solyc07g065960.1	3.24691	3.93e-27	0.99834	4.12873e-06
Lnc_000138	3.66108	3.54e-08	Solyc07g065970.1	3.24691	3.93e-27	0.99834	4.12873e-06
Lnc_000138	3.66108	3.54e-08	Solyc07g065980.3	3.24691	3.93e-27	0.993719	5.9058e-05
Lnc_000138	3.66108	3.54e-08	Solyc07g065985.1	3.24691	3.93e-27	0.993719	5.9058e-05
Lnc_000138	3.66108	3.54e-08	Solyc08g023510.2	-1.08735	3.54e-13	0.996809	1.52581e-05
Lnc_000138	3.66108	3.54e-08	Solyc08g062220.3	1.0915	6.26e-05	0.990304	0.00014057
Lnc_000138	3.66108	3.54e-08	Solyc08g065710.2	1.08431	2.34e-05	0.997289	1.10172e-05
Lnc_000138	3.66108	3.54e-08	Solyc08g068070.3	1.65348	9.16e-06	0.991818	0.000100153
Lnc_000138	3.66108	3.54e-08	Solyc08g068850.3	-1.5875	1.7e-12	0.992283	8.91052e-05
Lnc_000138	3.66108	3.54e-08	Solyc08g077410.3	1.12817	6.54e-05	0.998674	2.63514e-06
Lnc_000138	3.66108	3.54e-08	Solyc08g077530.3	1.34022	4.92e-05	0.995163	3.50347e-05
Lnc_000138	3.66108	3.54e-08	Solyc08g078040.3	3.20512	2.37e-29	0.997054	1.3004e-05
Lnc_000138	3.66108	3.54e-08	Solyc08g078690.3	1.27144	0.000740617	0.992574	8.25174e-05
Lnc_000138	3.66108	3.54e-08	Solyc08g078695.1	1.27144	0.000740617	0.992574	8.25174e-05
Lnc_000138	3.66108	3.54e-08	Solyc08g081680.2	1.75659	2.41e-07	0.997013	1.33741e-05
Lnc_000138	3.66108	3.54e-08	Solyc08g081740.3	1.15348	0.0004956	0.997476	9.5515e-06
Lnc_000138	3.66108	3.54e-08	Solyc09g005400.3	1.32542	0.00362247	-0.990668	0.000130221
Lnc_000138	3.66108	3.54e-08	Solyc09g011470.3	1.62302	7.97e-07	0.997055	1.29955e-05
Lnc_000138	3.66108	3.54e-08	Solyc09g014910.3	-1.05727	3.68e-05	0.994964	3.79746e-05
Lnc_000138	3.66108	3.54e-08	Solyc09g018740.1	-1.48672	1.3e-17	0.991656	0.000104152
Lnc_000138	3.66108	3.54e-08	Solyc09g065540.3	1.20604	6.19e-05	0.995805	2.63603e-05
Lnc_000138	3.66108	3.54e-08	Solyc09g065560.3	1.20604	6.19e-05	0.998302	4.32218e-06
Lnc_000138	3.66108	3.54e-08	Solyc09g065660.3	2.15691	3.57e-10	0.99483	4.00287e-05
Lnc_000138	3.66108	3.54e-08	Solyc09g066300.2	-1.5385	1.62e-13	-0.996937	1.40545e-05
Lnc_000138	3.66108	3.54e-08	Solyc09g072880.3	2.30183	4.08e-17	0.999124	1.1495e-06
Lnc_000138	3.66108	3.54e-08	Solyc09g072885.1	2.30183	4.08e-17	0.999124	1.1495e-06
Lnc_000138	3.66108	3.54e-08	Solyc09g074350.1	-1.73545	0.000611683	0.997654	8.25091e-06
Lnc_000138	3.66108	3.54e-08	Solyc09g075820.3	-1.15081	9.9e-13	0.991143	0.00011733
Lnc_000138	3.66108	3.54e-08	Solyc09g082340.2	2.76443	3.6e-33	0.994024	5.34672e-05
Lnc_000138	3.66108	3.54e-08	Solyc09g089550.3	1.62594	0.000153181	0.990217	0.000143092
Lnc_000138	3.66108	3.54e-08	Solyc09g089580.3	3.14772	8.25e-29	0.995268	3.35293e-05
Lnc_000138	3.66108	3.54e-08	Solyc09g089930.2	2.38529	4.22e-18	0.99884	2.01832e-06
Lnc_000138	3.66108	3.54e-08	Solyc09g097950.2	3.6804	1.77e-60	0.991906	9.80123e-05
Lnc_000138	3.66108	3.54e-08	Solyc09g097960.3	3.6804	1.77e-60	0.991906	9.80123e-05
Lnc_000138	3.66108	3.54e-08	Solyc10g007880.3	2.49462	2.19e-18	0.99861	2.89628e-06
Lnc_000138	3.66108	3.54e-08	Solyc10g051010.2	1.31142	4.67e-06	0.996593	1.73924e-05
Lnc_000138	3.66108	3.54e-08	Solyc10g051020.2	1.31142	4.67e-06	0.996593	1.73924e-05
Lnc_000138	3.66108	3.54e-08	Solyc10g051030.2	1.31142	4.67e-06	0.996593	1.73924e-05
Lnc_000138	3.66108	3.54e-08	Solyc10g075090.2	4.26084	3.04e-07	0.995737	2.72174e-05
Lnc_000138	3.66108	3.54e-08	Solyc10g076650.2	1.13294	3.88e-12	0.990301	0.000140653
Lnc_000138	3.66108	3.54e-08	Solyc10g076660.2	1.13294	3.88e-12	0.990991	0.00012138
Lnc_000138	3.66108	3.54e-08	Solyc10g076680.1	1.13294	3.88e-12	0.990991	0.00012138
Lnc_000138	3.66108	3.54e-08	Solyc10g083690.3	-1.03627	5.08e-09	0.99461	4.34944e-05
Lnc_000138	3.66108	3.54e-08	Solyc10g084400.2	1.20492	0.00300873	0.990423	0.000137132
Lnc_000138	3.66108	3.54e-08	Solyc10g084960.2	-1.71064	0.00224983	0.994813	4.02825e-05
Lnc_000138	3.66108	3.54e-08	Solyc10g085860.1	1.68757	9.71e-09	0.99715	1.21707e-05
Lnc_000138	3.66108	3.54e-08	Solyc11g006720.2	1.59168	2.36e-09	0.993647	6.04118e-05
Lnc_000138	3.66108	3.54e-08	Solyc11g006735.1	1.59168	2.36e-09	0.993647	6.04118e-05
Lnc_000138	3.66108	3.54e-08	Solyc11g006740.2	1.59168	2.36e-09	0.993647	6.04118e-05
Lnc_000138	3.66108	3.54e-08	Solyc11g007490.1	1.72774	1.97e-13	0.998674	2.63793e-06
Lnc_000138	3.66108	3.54e-08	Solyc11g007500.2	1.72774	1.97e-13	0.998034	5.79451e-06
Lnc_000138	3.66108	3.54e-08	Solyc11g007930.1	-1.45377	1.19e-12	-0.992872	7.60363e-05
Lnc_000138	3.66108	3.54e-08	Solyc11g010380.2	-1.63934	1.94e-14	0.992242	9.00406e-05
Lnc_000138	3.66108	3.54e-08	Solyc11g027773.1	-2.78955	1.06e-32	0.996026	2.3662e-05
Lnc_000138	3.66108	3.54e-08	Solyc11g062400.2	-1.01299	4.55e-05	0.994338	4.79962e-05
Lnc_000138	3.66108	3.54e-08	Solyc11g069640.2	1.40702	4.32e-05	0.993817	5.72298e-05
Lnc_000138	3.66108	3.54e-08	Solyc11g069650.2	1.40702	4.32e-05	0.993817	5.72298e-05
Lnc_000138	3.66108	3.54e-08	Solyc11g069660.2	1.40702	4.32e-05	0.993817	5.72298e-05
Lnc_000138	3.66108	3.54e-08	Solyc11g069670.2	1.40702	4.32e-05	0.993817	5.72298e-05
Lnc_000138	3.66108	3.54e-08	Solyc11g072630.2	-1.42049	1.01e-16	0.997082	1.27597e-05
Lnc_000138	3.66108	3.54e-08	Solyc12g005850.2	1.58661	0.00244183	0.996839	1.49753e-05
Lnc_000138	3.66108	3.54e-08	Solyc12g008850.2	1.08885	1.98e-06	0.990999	0.000121158
Lnc_000138	3.66108	3.54e-08	Solyc12g013580.2	1.91146	1.03e-10	0.999402	5.35864e-07
Lnc_000138	3.66108	3.54e-08	Solyc12g013700.2	2.75225	2.05e-24	0.999175	1.02036e-06
Lnc_000138	3.66108	3.54e-08	Solyc12g014010.2	2.07416	2.2e-14	0.996699	1.63304e-05
Lnc_000138	3.66108	3.54e-08	Solyc12g042600.2	1.19584	0.000482862	0.994889	3.91126e-05
Lnc_000138	3.66108	3.54e-08	Solyc12g056590.2	2.8917	1.48e-19	0.995944	2.46417e-05
Lnc_000138	3.66108	3.54e-08	Solyc12g096570.1	3.86636	9.32e-68	0.997784	7.36117e-06
Lnc_000138	3.66108	3.54e-08	Solyc12g096840.2	1.47666	3.04e-05	0.991501	0.00010805
Lnc_000138	3.66108	3.54e-08	Solyc12g098900.2	-1.13782	2.55e-10	0.99243	8.57453e-05
Lnc_000140	1.72338	0.0416151	Solyc01g079110.3	-1.23082	1.13e-14	-0.994403	4.69031e-05
Lnc_000140	1.72338	0.0416151	Solyc01g080600.3	-1.08879	2.37e-06	-0.990299	0.000140714
Lnc_000140	1.72338	0.0416151	Solyc03g061550.1	1.09905	0.00840022	0.997425	9.93566e-06
Lnc_000140	1.72338	0.0416151	Solyc08g067180.3	-1.68128	1.72e-12	-0.992984	7.36667e-05
Lnc_000140	1.72338	0.0416151	Solyc10g075070.2	1.50561	2.18e-05	0.99094	0.00012274
Lnc_000146	2.34615	0.00837148	Solyc01g015290.1	-1.09391	1.67e-10	0.991788	0.000100879
Lnc_000146	2.34615	0.00837148	Solyc01g109920.2	-1.1115	4.52e-10	0.994943	3.83011e-05
Lnc_000146	2.34615	0.00837148	Solyc02g037495.1	1.339	2.82e-06	0.991429	0.000109886
Lnc_000146	2.34615	0.00837148	Solyc02g062710.1	1.84805	1.82e-08	0.993918	5.53666e-05
Lnc_000146	2.34615	0.00837148	Solyc03g006490.3	1.49018	1.96e-06	0.992963	7.41148e-05
Lnc_000146	2.34615	0.00837148	Solyc03g033840.3	-1.15851	3.16e-11	0.993567	6.19449e-05
Lnc_000146	2.34615	0.00837148	Solyc03g043900.1	1.58354	1.14e-08	0.992913	7.5165e-05
Lnc_000146	2.34615	0.00837148	Solyc05g015490.3	1.5945	1.62e-05	0.996904	1.43653e-05
Lnc_000146	2.34615	0.00837148	Solyc05g052670.1	-2.01608	2.25e-21	0.990549	0.000133568
Lnc_000146	2.34615	0.00837148	Solyc05g052680.1	1.33218	1e-05	0.990549	0.000133568
Lnc_000146	2.34615	0.00837148	Solyc05g056180.1	-1.01168	1.93e-09	0.997023	1.32832e-05
Lnc_000146	2.34615	0.00837148	Solyc06g005390.1	-1.09251	0.000374978	-0.991694	0.000103198
Lnc_000146	2.34615	0.00837148	Solyc06g009000.1	-1.66822	5.22e-12	0.990859	0.000124942
Lnc_000146	2.34615	0.00837148	Solyc06g061110.2	1.03183	0.0123672	0.997021	1.3302e-05
Lnc_000146	2.34615	0.00837148	Solyc06g069040.3	-1.14636	3.96e-09	0.999187	9.91414e-07
Lnc_000146	2.34615	0.00837148	Solyc07g063850.3	1.77584	1.37e-07	0.991124	0.000117834
Lnc_000146	2.34615	0.00837148	Solyc08g068850.3	-1.5875	1.7e-12	0.995439	3.11513e-05
Lnc_000146	2.34615	0.00837148	Solyc09g018740.1	-1.48672	1.3e-17	0.995182	3.47667e-05
Lnc_000146	2.34615	0.00837148	Solyc09g065540.3	1.20604	6.19e-05	0.994174	5.08096e-05
Lnc_000146	2.34615	0.00837148	Solyc09g092710.3	-1.02909	2.95e-07	0.990328	0.000139858
Lnc_000146	2.34615	0.00837148	Solyc09g092715.1	-1.02909	2.95e-07	0.990328	0.000139858
Lnc_000146	2.34615	0.00837148	Solyc09g092720.3	-1.02909	2.95e-07	0.990328	0.000139858
Lnc_000146	2.34615	0.00837148	Solyc12g008850.2	1.08885	1.98e-06	0.991867	9.89426e-05
Lnc_000156	2.09326	3.39e-05	Solyc01g008670.3	1.07493	9.47e-05	0.992026	9.51143e-05
Lnc_000156	2.09326	3.39e-05	Solyc01g009860.3	1.18025	1.9e-05	0.991051	0.000119772
Lnc_000156	2.09326	3.39e-05	Solyc01g058250.2	-1.8582	6.36e-26	0.995268	3.35365e-05
Lnc_000156	2.09326	3.39e-05	Solyc01g081060.3	-1.08879	2.37e-06	0.996556	1.77681e-05
Lnc_000156	2.09326	3.39e-05	Solyc01g091030.3	1.26255	3.48e-05	0.997408	1.00685e-05
Lnc_000156	2.09326	3.39e-05	Solyc01g094340.3	1.37546	2.82e-10	0.990936	0.000122873
Lnc_000156	2.09326	3.39e-05	Solyc01g094690.3	1.37546	2.82e-10	-0.991072	0.000119204
Lnc_000156	2.09326	3.39e-05	Solyc01g095305.1	-1.25542	5.28e-16	0.995892	2.52791e-05
Lnc_000156	2.09326	3.39e-05	Solyc01g095320.3	-1.25542	5.28e-16	0.995892	2.52791e-05
Lnc_000156	2.09326	3.39e-05	Solyc01g098190.3	1.58851	2.33e-10	0.991658	0.000104092
Lnc_000156	2.09326	3.39e-05	Solyc01g105010.3	-1.05238	1.87e-06	-0.990232	0.000142641
Lnc_000156	2.09326	3.39e-05	Solyc01g105420.3	1.06769	0.000750053	0.997636	8.37507e-06
Lnc_000156	2.09326	3.39e-05	Solyc02g062470.1	1.91106	2.35e-13	0.991933	9.7343e-05
Lnc_000156	2.09326	3.39e-05	Solyc02g062490.3	1.6978	8.9e-11	0.991933	9.7343e-05
Lnc_000156	2.09326	3.39e-05	Solyc02g062500.3	1.6978	8.9e-11	0.991933	9.7343e-05
Lnc_000156	2.09326	3.39e-05	Solyc02g062710.1	1.84805	1.82e-08	0.990843	0.0001254
Lnc_000156	2.09326	3.39e-05	Solyc02g067230.3	-1.61579	2.63e-13	0.992287	8.90063e-05
Lnc_000156	2.09326	3.39e-05	Solyc02g071870.3	-1.49494	5.05e-18	0.990392	0.000138041
Lnc_000156	2.09326	3.39e-05	Solyc02g071875.1	-1.49494	5.05e-18	0.990392	0.000138041
Lnc_000156	2.09326	3.39e-05	Solyc02g077480.1	3.97473	2.09e-48	-0.994633	4.3123e-05
Lnc_000156	2.09326	3.39e-05	Solyc02g077490.3	-1.6406	9.12e-09	-0.994633	4.3123e-05
Lnc_000156	2.09326	3.39e-05	Solyc02g077510.3	-1.6406	9.12e-09	-0.994633	4.3123e-05
Lnc_000156	2.09326	3.39e-05	Solyc02g077520.3	-1.6406	9.12e-09	-0.994633	4.3123e-05
Lnc_000156	2.09326	3.39e-05	Solyc02g077525.1	-1.6406	9.12e-09	-0.994633	4.3123e-05
Lnc_000156	2.09326	3.39e-05	Solyc02g077530.2	-1.6406	9.12e-09	-0.994633	4.3123e-05
Lnc_000156	2.09326	3.39e-05	Solyc02g082890.1	-1.52425	1.5e-07	0.994507	4.51724e-05
Lnc_000156	2.09326	3.39e-05	Solyc03g005210.3	1.49297	1.49e-08	0.996426	1.91423e-05
Lnc_000156	2.09326	3.39e-05	Solyc03g005227.1	1.49297	1.49e-08	-0.994639	4.30327e-05
Lnc_000156	2.09326	3.39e-05	Solyc03g080120.1	1.02527	0.000655514	0.995776	2.67219e-05
Lnc_000156	2.09326	3.39e-05	Solyc03g094120.3	-1.12996	5.85e-08	0.992546	8.31426e-05
Lnc_000156	2.09326	3.39e-05	Solyc03g097420.3	-1.20701	1.22e-05	-0.995065	3.64722e-05
Lnc_000156	2.09326	3.39e-05	Solyc03g117630.1	-3.02206	7.7e-42	0.993111	7.10323e-05
Lnc_000156	2.09326	3.39e-05	Solyc03g117800.3	1.31451	3.5e-06	0.996162	2.20622e-05
Lnc_000156	2.09326	3.39e-05	Solyc03g119300.3	-1.99207	1.41e-22	0.990955	0.000122344
Lnc_000156	2.09326	3.39e-05	Solyc03g119305.1	-1.99207	1.41e-22	0.990955	0.000122344
Lnc_000156	2.09326	3.39e-05	Solyc04g005610.3	2.19867	1.93e-18	0.990049	0.000148034
Lnc_000156	2.09326	3.39e-05	Solyc04g005810.3	-1.5641	9.26e-08	-0.994502	4.52628e-05
Lnc_000156	2.09326	3.39e-05	Solyc04g007170.3	1.155	8.45e-06	0.994431	4.64333e-05
Lnc_000156	2.09326	3.39e-05	Solyc04g007795.1	-1.01406	1.67e-06	-0.996282	2.07095e-05
Lnc_000156	2.09326	3.39e-05	Solyc04g009590.3	-1.69738	0.0121646	-0.996461	1.87616e-05
Lnc_000156	2.09326	3.39e-05	Solyc04g011390.1	-1.14139	5.56e-13	-0.997239	1.14264e-05
Lnc_000156	2.09326	3.39e-05	Solyc04g082420.3	1.2273	1.37e-05	0.990748	0.000127994
Lnc_000156	2.09326	3.39e-05	Solyc04g082830.3	-1.48235	1.68e-09	0.992126	9.27582e-05
Lnc_000156	2.09326	3.39e-05	Solyc05g007060.3	-1.29709	1.99e-11	0.996076	2.30714e-05
Lnc_000156	2.09326	3.39e-05	Solyc05g007580.1	-1.56198	4.46e-09	0.992723	7.92479e-05
Lnc_000156	2.09326	3.39e-05	Solyc05g007770.3	1.68573	2.13e-12	0.996539	1.79455e-05
Lnc_000156	2.09326	3.39e-05	Solyc05g051215.1	1.78999	4.09e-12	0.993065	7.19674e-05
Lnc_000156	2.09326	3.39e-05	Solyc05g051900.3	1.18472	0.000101436	0.991734	0.00010222
Lnc_000156	2.09326	3.39e-05	Solyc05g054360.3	1.19736	9.4e-06	0.99411	5.19444e-05
Lnc_000156	2.09326	3.39e-05	Solyc05g054610.1	-1.46718	8.35e-09	-0.995288	3.32587e-05
Lnc_000156	2.09326	3.39e-05	Solyc05g055550.3	1.1797	9.32e-06	0.993596	6.13795e-05
Lnc_000156	2.09326	3.39e-05	Solyc06g005420.1	-1.09251	0.000374978	-0.996901	1.43946e-05
Lnc_000156	2.09326	3.39e-05	Solyc06g005430.1	-1.09251	0.000374978	-0.996901	1.43946e-05
Lnc_000156	2.09326	3.39e-05	Solyc06g005620.3	-1.32737	3.61e-05	-0.994919	3.86564e-05
Lnc_000156	2.09326	3.39e-05	Solyc06g007390.3	-1.39623	8.75e-13	0.995827	2.60788e-05
Lnc_000156	2.09326	3.39e-05	Solyc06g010060.1	1.25383	3.33e-06	0.994431	4.64362e-05
Lnc_000156	2.09326	3.39e-05	Solyc06g054540.3	-1.1815	1.12e-06	0.997278	1.11064e-05
Lnc_000156	2.09326	3.39e-05	Solyc06g073220.1	-1.67171	7.9e-10	-0.990098	0.000146584
Lnc_000156	2.09326	3.39e-05	Solyc06g074750.1	-1.7606	4.26e-18	0.993089	7.14768e-05
Lnc_000156	2.09326	3.39e-05	Solyc06g075800.1	-1.48651	1.6e-14	-0.996518	1.81684e-05
Lnc_000156	2.09326	3.39e-05	Solyc06g075830.2	-1.01639	6.94e-06	-0.993341	6.63698e-05
Lnc_000156	2.09326	3.39e-05	Solyc06g075930.1	-1.01639	6.94e-06	-0.993341	6.63698e-05
Lnc_000156	2.09326	3.39e-05	Solyc06g075960.1	-1.01639	6.94e-06	-0.993341	6.63698e-05
Lnc_000156	2.09326	3.39e-05	Solyc07g006120.3	1.08513	0.000131933	0.993736	5.87322e-05
Lnc_000156	2.09326	3.39e-05	Solyc07g006130.2	1.08513	0.000131933	0.993736	5.87322e-05
Lnc_000156	2.09326	3.39e-05	Solyc07g006800.1	2.1468	2.56e-14	0.991716	0.000102652
Lnc_000156	2.09326	3.39e-05	Solyc07g007930.3	4.25527	1.38e-63	0.991334	0.00011232
Lnc_000156	2.09326	3.39e-05	Solyc07g017510.3	-1.48793	7.27e-14	0.992208	9.08397e-05
Lnc_000156	2.09326	3.39e-05	Solyc07g026675.1	1.22471	4.55e-06	0.996898	1.44184e-05
Lnc_000156	2.09326	3.39e-05	Solyc07g026680.2	1.22471	4.55e-06	0.996898	1.44184e-05
Lnc_000156	2.09326	3.39e-05	Solyc07g041830.3	-2.34911	1.09e-19	0.992608	8.17653e-05
Lnc_000156	2.09326	3.39e-05	Solyc07g053490.3	1.11052	7.26e-05	0.995376	3.20203e-05
Lnc_000156	2.09326	3.39e-05	Solyc07g053495.1	1.11052	7.26e-05	0.995376	3.20203e-05
Lnc_000156	2.09326	3.39e-05	Solyc07g053520.2	1.11052	7.26e-05	0.995376	3.20203e-05
Lnc_000156	2.09326	3.39e-05	Solyc07g053525.1	1.11052	7.26e-05	0.995376	3.20203e-05
Lnc_000156	2.09326	3.39e-05	Solyc07g056420.4	2.66083	3.65e-35	0.990028	0.000148663
Lnc_000156	2.09326	3.39e-05	Solyc07g061730.3	5.30199	2.95e-98	0.991579	0.000106073
Lnc_000156	2.09326	3.39e-05	Solyc07g062480.1	2.3671	6e-19	0.992464	8.49707e-05
Lnc_000156	2.09326	3.39e-05	Solyc07g065980.3	3.24691	3.93e-27	0.990359	0.000138987
Lnc_000156	2.09326	3.39e-05	Solyc07g065985.1	3.24691	3.93e-27	0.990359	0.000138987
Lnc_000156	2.09326	3.39e-05	Solyc08g061490.3	1.0915	6.26e-05	0.996489	1.84644e-05
Lnc_000156	2.09326	3.39e-05	Solyc08g065330.3	1.23095	2.93e-05	0.993878	5.60972e-05
Lnc_000156	2.09326	3.39e-05	Solyc08g067410.2	1.0924	0.000254125	0.995012	3.72651e-05
Lnc_000156	2.09326	3.39e-05	Solyc08g068150.3	1.65348	9.16e-06	0.996006	2.38936e-05
Lnc_000156	2.09326	3.39e-05	Solyc08g078310.3	1.1535	1.57e-05	0.992629	8.12893e-05
Lnc_000156	2.09326	3.39e-05	Solyc09g008820.3	-1.07984	5.32e-07	0.992307	8.85367e-05
Lnc_000156	2.09326	3.39e-05	Solyc09g009985.1	1.06369	2.14e-07	0.997514	9.26254e-06
Lnc_000156	2.09326	3.39e-05	Solyc09g010000.3	1.06369	2.14e-07	0.997514	9.26254e-06
Lnc_000156	2.09326	3.39e-05	Solyc09g010010.1	1.06369	2.14e-07	0.997514	9.26254e-06
Lnc_000156	2.09326	3.39e-05	Solyc09g014870.1	-1.05727	3.68e-05	-0.991206	0.000115672
Lnc_000156	2.09326	3.39e-05	Solyc09g063130.3	1.38434	1.38e-10	0.994062	5.27852e-05
Lnc_000156	2.09326	3.39e-05	Solyc09g065390.1	1.51188	1.03e-07	0.990198	0.000143638
Lnc_000156	2.09326	3.39e-05	Solyc09g074300.1	-1.73545	0.000611683	-0.994747	4.13144e-05
Lnc_000156	2.09326	3.39e-05	Solyc09g075610.3	-1.67155	1.28e-12	0.994809	4.03487e-05
Lnc_000156	2.09326	3.39e-05	Solyc09g082110.3	-1.15081	9.9e-13	0.991392	0.000110838
Lnc_000156	2.09326	3.39e-05	Solyc09g082120.3	-1.15081	9.9e-13	0.991392	0.000110838
Lnc_000156	2.09326	3.39e-05	Solyc09g082220.1	-1.15081	9.9e-13	0.994829	4.00336e-05
Lnc_000156	2.09326	3.39e-05	Solyc09g089550.3	1.62594	0.000153181	0.99321	6.90088e-05
Lnc_000156	2.09326	3.39e-05	Solyc09g092420.2	1.40745	2.08e-14	0.993404	6.51179e-05
Lnc_000156	2.09326	3.39e-05	Solyc09g092640.3	-1.02909	2.95e-07	0.995505	3.02635e-05
Lnc_000156	2.09326	3.39e-05	Solyc09g092710.3	-1.02909	2.95e-07	0.993539	6.24867e-05
Lnc_000156	2.09326	3.39e-05	Solyc09g092715.1	-1.02909	2.95e-07	0.993539	6.24867e-05
Lnc_000156	2.09326	3.39e-05	Solyc09g092720.3	-1.02909	2.95e-07	0.993539	6.24867e-05
Lnc_000156	2.09326	3.39e-05	Solyc10g005880.3	1.55718	5.76e-11	0.995798	2.64496e-05
Lnc_000156	2.09326	3.39e-05	Solyc10g008470.3	1.1184	3.52e-06	0.996096	2.28283e-05
Lnc_000156	2.09326	3.39e-05	Solyc10g074890.2	1.00722	0.00160567	0.994159	5.10707e-05
Lnc_000156	2.09326	3.39e-05	Solyc10g079630.1	-1.16234	2.84e-06	-0.99368	5.97924e-05
Lnc_000156	2.09326	3.39e-05	Solyc11g007370.2	1.72774	1.97e-13	0.991498	0.000108117
Lnc_000156	2.09326	3.39e-05	Solyc11g007390.1	1.72774	1.97e-13	0.991498	0.000108117
Lnc_000156	2.09326	3.39e-05	Solyc11g007460.1	1.72774	1.97e-13	0.991498	0.000108117
Lnc_000156	2.09326	3.39e-05	Solyc12g010740.2	1.17299	7.54e-06	0.995671	2.80759e-05
Lnc_000156	2.09326	3.39e-05	Solyc12g010745.1	1.17299	7.54e-06	0.995671	2.80759e-05
Lnc_000156	2.09326	3.39e-05	Solyc12g010750.2	1.17299	7.54e-06	0.995671	2.80759e-05
Lnc_000156	2.09326	3.39e-05	Solyc12g013680.2	-1.51588	6.31e-13	0.992455	8.51804e-05
Lnc_000156	2.09326	3.39e-05	Solyc12g042600.2	1.19584	0.000482862	0.990328	0.000139862
Lnc_000156	2.09326	3.39e-05	Solyc12g099440.2	-1.2747	6.75e-08	0.994106	5.20115e-05
Lnc_000162	-1.35252	3.64e-08	Solyc00g075035.1	-2.23893	0.000147753	0.992216	9.06479e-05
Lnc_000162	-1.35252	3.64e-08	Solyc01g006825.1	1.03013	0.00936369	0.990988	0.000121455
Lnc_000162	-1.35252	3.64e-08	Solyc01g008330.3	1.23706	2.75e-07	0.99622	2.14007e-05
Lnc_000162	-1.35252	3.64e-08	Solyc01g067860.3	-1.52326	6.48e-07	0.993497	6.32936e-05
Lnc_000162	-1.35252	3.64e-08	Solyc01g079580.3	1.45116	1.63e-11	0.999502	3.72531e-07
Lnc_000162	-1.35252	3.64e-08	Solyc01g086925.1	-1.10342	5.78e-11	0.991272	0.000113941
Lnc_000162	-1.35252	3.64e-08	Solyc01g086930.3	-1.10342	5.78e-11	0.991272	0.000113941
Lnc_000162	-1.35252	3.64e-08	Solyc01g087540.3	-1.56209	6.51e-11	0.990772	0.000127343
Lnc_000162	-1.35252	3.64e-08	Solyc01g087970.3	-1.2704	8.87e-09	0.99915	1.08364e-06
Lnc_000162	-1.35252	3.64e-08	Solyc01g088400.3	-1.27181	3.25e-10	0.993731	5.88229e-05
Lnc_000162	-1.35252	3.64e-08	Solyc01g088410.3	-1.27181	3.25e-10	0.993731	5.88229e-05
Lnc_000162	-1.35252	3.64e-08	Solyc01g091200.3	-1.37387	1.52e-07	0.993752	5.84332e-05
Lnc_000162	-1.35252	3.64e-08	Solyc01g096450.3	1.1566	0.000406123	0.993779	5.7924e-05
Lnc_000162	-1.35252	3.64e-08	Solyc01g099270.2	-1.6307	7.87e-09	0.990054	0.0001479
Lnc_000162	-1.35252	3.64e-08	Solyc01g099630.3	-1.41432	4.58e-10	0.996592	1.7402e-05
Lnc_000162	-1.35252	3.64e-08	Solyc01g106290.3	-1.02157	4.09e-05	0.993202	6.91625e-05
Lnc_000162	-1.35252	3.64e-08	Solyc01g106520.1	-1.294	7.68e-13	0.995809	2.63122e-05
Lnc_000162	-1.35252	3.64e-08	Solyc01g106540.3	-1.294	7.68e-13	0.995809	2.63122e-05
Lnc_000162	-1.35252	3.64e-08	Solyc01g107260.3	-1.09251	1.35e-08	0.998765	2.28632e-06
Lnc_000162	-1.35252	3.64e-08	Solyc01g109430.3	-1.26893	5.15e-11	0.996393	1.94887e-05
Lnc_000162	-1.35252	3.64e-08	Solyc02g066970.1	-1.61579	2.63e-13	0.993671	5.99491e-05
Lnc_000162	-1.35252	3.64e-08	Solyc02g067410.2	-1.45694	1.3e-08	0.996229	2.13045e-05
Lnc_000162	-1.35252	3.64e-08	Solyc02g071930.1	-1.33379	8.01e-09	0.990436	0.000136757
Lnc_000162	-1.35252	3.64e-08	Solyc02g076680.3	-1.04972	1.14e-10	0.997567	8.87533e-06
Lnc_000162	-1.35252	3.64e-08	Solyc02g078760.1	-1.15595	1.36e-09	0.991292	0.000113412
Lnc_000162	-1.35252	3.64e-08	Solyc02g079440.2	-3.92685	1.36e-86	0.995842	2.58957e-05
Lnc_000162	-1.35252	3.64e-08	Solyc02g080670.3	-2.01596	0.000398827	0.999157	1.06614e-06
Lnc_000162	-1.35252	3.64e-08	Solyc02g080700.2	-2.01596	0.000398827	0.999157	1.06614e-06
Lnc_000162	-1.35252	3.64e-08	Solyc02g082870.3	-1.52425	1.5e-07	0.990783	0.000127052
Lnc_000162	-1.35252	3.64e-08	Solyc02g083930.1	-1.39579	1.18e-07	0.990549	0.000133565
Lnc_000162	-1.35252	3.64e-08	Solyc02g086470.3	-1.32437	2.23e-06	0.995674	2.80294e-05
Lnc_000162	-1.35252	3.64e-08	Solyc02g087190.1	-1.0038	7.58e-08	0.992328	8.80649e-05
Lnc_000162	-1.35252	3.64e-08	Solyc02g088080.2	3.59335	9.02e-60	0.993508	6.30787e-05
Lnc_000162	-1.35252	3.64e-08	Solyc02g088100.3	-1.35372	1.77e-12	0.990309	0.000140422
Lnc_000162	-1.35252	3.64e-08	Solyc02g089990.1	-1.26242	6.25e-10	0.998442	3.64129e-06
Lnc_000162	-1.35252	3.64e-08	Solyc02g090610.1	-1.17897	3.23e-10	0.997603	8.60988e-06
Lnc_000162	-1.35252	3.64e-08	Solyc02g091890.2	-1.12067	1.07e-10	0.994659	4.27191e-05
Lnc_000162	-1.35252	3.64e-08	Solyc02g092840.1	1.68213	2.11e-05	0.991399	0.000110655
Lnc_000162	-1.35252	3.64e-08	Solyc03g005200.3	-1.22067	1.07e-10	0.998037	5.77448e-06
Lnc_000162	-1.35252	3.64e-08	Solyc03g006840.3	-1.21071	1.35e-08	0.996102	2.27585e-05
Lnc_000162	-1.35252	3.64e-08	Solyc03g006880.3	-1.07703	8.27e-07	0.993023	7.28492e-05
Lnc_000162	-1.35252	3.64e-08	Solyc03g032035.1	-1.98113	2.06e-15	0.990675	0.000130039
Lnc_000162	-1.35252	3.64e-08	Solyc03g032040.3	-1.98113	2.06e-15	0.990675	0.000130039
Lnc_000162	-1.35252	3.64e-08	Solyc03g034206.1	-1.02217	1.33e-07	0.998767	2.27845e-06
Lnc_000162	-1.35252	3.64e-08	Solyc03g034208.1	-1.02217	1.33e-07	0.998767	2.27845e-06
Lnc_000162	-1.35252	3.64e-08	Solyc03g093790.3	-1.12996	5.85e-08	0.99648	1.85659e-05
Lnc_000162	-1.35252	3.64e-08	Solyc03g112390.3	1.19528	0.000188674	0.990512	0.000134618
Lnc_000162	-1.35252	3.64e-08	Solyc03g114890.3	-1.03189	5.23e-11	0.994398	4.69853e-05
Lnc_000162	-1.35252	3.64e-08	Solyc03g114900.3	-1.03189	5.23e-11	0.994398	4.69853e-05
Lnc_000162	-1.35252	3.64e-08	Solyc03g115000.3	-1.01485	5.96e-09	0.998511	3.32585e-06
Lnc_000162	-1.35252	3.64e-08	Solyc03g115640.3	-1.41171	3.39e-10	0.996717	1.61486e-05
Lnc_000162	-1.35252	3.64e-08	Solyc03g116060.3	-1.44615	6.63e-16	0.995919	2.49461e-05
Lnc_000162	-1.35252	3.64e-08	Solyc03g116067.1	-1.44615	6.63e-16	0.995919	2.49461e-05
Lnc_000162	-1.35252	3.64e-08	Solyc03g119660.2	-1.04626	3.89e-07	0.996424	1.91575e-05
Lnc_000162	-1.35252	3.64e-08	Solyc03g120890.3	-1.46941	1.48e-08	0.998552	3.14534e-06
Lnc_000162	-1.35252	3.64e-08	Solyc04g008650.3	-1.2633	1.05e-09	0.99975	9.3868e-08
Lnc_000162	-1.35252	3.64e-08	Solyc04g009820.3	-1.28416	7.71e-06	0.992573	8.25251e-05
Lnc_000162	-1.35252	3.64e-08	Solyc04g049920.3	-1.05932	3.37e-11	0.998278	4.4479e-06
Lnc_000162	-1.35252	3.64e-08	Solyc04g050170.3	-1.05932	3.37e-11	0.995278	3.33879e-05
Lnc_000162	-1.35252	3.64e-08	Solyc04g051270.2	1.14789	2.19e-08	0.990094	0.000146708
Lnc_000162	-1.35252	3.64e-08	Solyc04g071500.3	-1.09123	5.86e-08	0.99485	3.97198e-05
Lnc_000162	-1.35252	3.64e-08	Solyc04g072850.3	-1.19847	2.99e-08	0.996773	1.56068e-05
Lnc_000162	-1.35252	3.64e-08	Solyc04g074310.3	-2.30729	2.54e-28	0.997831	7.05306e-06
Lnc_000162	-1.35252	3.64e-08	Solyc04g074740.3	-1.2087	7.24e-12	0.991078	0.000119039
Lnc_000162	-1.35252	3.64e-08	Solyc04g077020.3	-1.04208	3.66e-12	0.99282	7.71341e-05
Lnc_000162	-1.35252	3.64e-08	Solyc04g077960.1	-1.20766	5.08e-07	0.995841	2.59108e-05
Lnc_000162	-1.35252	3.64e-08	Solyc04g078590.3	-1.14505	7.84e-07	0.99689	1.4495e-05
Lnc_000162	-1.35252	3.64e-08	Solyc04g078810.3	-1.02249	2.14e-08	0.997851	6.92349e-06
Lnc_000162	-1.35252	3.64e-08	Solyc04g079700.3	-1.10404	8.85e-09	0.998231	4.69381e-06
Lnc_000162	-1.35252	3.64e-08	Solyc04g079860.1	-1.06107	3.47e-10	0.994061	5.27972e-05
Lnc_000162	-1.35252	3.64e-08	Solyc04g081120.1	-1.01993	7.46e-11	0.994248	4.95412e-05
Lnc_000162	-1.35252	3.64e-08	Solyc05g006510.1	-1.57998	1.41e-07	0.991277	0.000113814
Lnc_000162	-1.35252	3.64e-08	Solyc05g006650.3	-1.29709	1.99e-11	0.996119	2.25633e-05
Lnc_000162	-1.35252	3.64e-08	Solyc05g008020.3	-1.01532	1.13e-07	0.995538	2.98233e-05
Lnc_000162	-1.35252	3.64e-08	Solyc05g008550.3	-1.29494	1.76e-11	0.999892	1.74424e-08
Lnc_000162	-1.35252	3.64e-08	Solyc05g014540.3	-1.18758	3.24e-08	0.992647	8.08903e-05
Lnc_000162	-1.35252	3.64e-08	Solyc05g014710.3	-1.4659	3.24e-06	0.993317	6.68376e-05
Lnc_000162	-1.35252	3.64e-08	Solyc05g046020.3	-1.66623	0.0012356	0.99108	0.000118983
Lnc_000162	-1.35252	3.64e-08	Solyc05g046030.3	-1.66623	0.0012356	0.99108	0.000118983
Lnc_000162	-1.35252	3.64e-08	Solyc05g055840.3	-1.03601	9.04e-12	0.99452	4.49557e-05
Lnc_000162	-1.35252	3.64e-08	Solyc05g055845.1	-1.13447	4.96e-09	0.99452	4.49557e-05
Lnc_000162	-1.35252	3.64e-08	Solyc06g005610.1	-1.32737	3.61e-05	0.994352	4.77678e-05
Lnc_000162	-1.35252	3.64e-08	Solyc06g016790.2	-2.7826	9.59e-27	0.993377	6.56433e-05
Lnc_000162	-1.35252	3.64e-08	Solyc06g035760.3	-1.25415	7.61e-11	0.990467	0.000135871
Lnc_000162	-1.35252	3.64e-08	Solyc06g048620.3	-1.11737	9.42e-10	0.991845	9.94934e-05
Lnc_000162	-1.35252	3.64e-08	Solyc06g050590.3	-1.06853	1.13e-10	0.992018	9.53191e-05
Lnc_000162	-1.35252	3.64e-08	Solyc06g050860.3	2.45392	1.11e-30	0.990803	0.000126477
Lnc_000162	-1.35252	3.64e-08	Solyc06g051960.3	-1.00826	9.61e-07	0.996438	1.90072e-05
Lnc_000162	-1.35252	3.64e-08	Solyc06g054280.1	-1.34718	8.01e-08	0.9932	6.91989e-05
Lnc_000162	-1.35252	3.64e-08	Solyc06g054290.2	-1.34718	8.01e-08	0.9932	6.91989e-05
Lnc_000162	-1.35252	3.64e-08	Solyc06g063430.2	1.13375	0.00153267	0.991819	0.000100115
Lnc_000162	-1.35252	3.64e-08	Solyc06g065690.3	-1.29838	1.16e-08	0.992173	9.16465e-05
Lnc_000162	-1.35252	3.64e-08	Solyc06g065820.3	-1.29838	1.16e-08	0.995568	2.94196e-05
Lnc_000162	-1.35252	3.64e-08	Solyc06g074000.1	-1.00481	3.73e-07	0.990653	0.000130638
Lnc_000162	-1.35252	3.64e-08	Solyc06g076860.3	-1.75322	4.84e-18	0.996053	2.33366e-05
Lnc_000162	-1.35252	3.64e-08	Solyc06g082070.3	-1.75322	4.84e-18	0.998203	4.83885e-06
Lnc_000162	-1.35252	3.64e-08	Solyc06g083070.3	-1.45193	1.84e-10	0.994882	3.922e-05
Lnc_000162	-1.35252	3.64e-08	Solyc06g084460.3	-1.34904	6.58e-12	0.996065	2.32002e-05
Lnc_000162	-1.35252	3.64e-08	Solyc07g006710.1	2.1468	2.56e-14	0.992143	9.23448e-05
Lnc_000162	-1.35252	3.64e-08	Solyc07g039380.3	2.19594	2.99e-18	0.995958	2.44741e-05
Lnc_000162	-1.35252	3.64e-08	Solyc07g041640.3	-1.10178	1.46e-09	0.991027	0.000120404
Lnc_000162	-1.35252	3.64e-08	Solyc07g043000.3	-1.10105	8.41e-07	0.991177	0.000116415
Lnc_000162	-1.35252	3.64e-08	Solyc07g043490.1	-1.63569	7.85e-19	0.991681	0.000103529
Lnc_000162	-1.35252	3.64e-08	Solyc07g043500.1	-1.63569	7.85e-19	0.998288	4.39279e-06
Lnc_000162	-1.35252	3.64e-08	Solyc07g043670.1	-1.73734	5.45e-09	0.998194	4.89214e-06
Lnc_000162	-1.35252	3.64e-08	Solyc07g053540.1	1.11052	7.26e-05	0.991915	9.77936e-05
Lnc_000162	-1.35252	3.64e-08	Solyc07g053790.2	1.34954	1.55e-05	0.995337	3.25692e-05
Lnc_000162	-1.35252	3.64e-08	Solyc07g055990.3	-1.14231	7.91e-11	0.990275	0.000141417
Lnc_000162	-1.35252	3.64e-08	Solyc07g065600.3	-1.64715	7.33e-15	0.997893	6.65548e-06
Lnc_000162	-1.35252	3.64e-08	Solyc07g066350.1	-1.43811	1.41e-09	0.993734	5.87685e-05
Lnc_000162	-1.35252	3.64e-08	Solyc08g005790.3	-1.10288	6.41e-09	0.996302	2.04852e-05
Lnc_000162	-1.35252	3.64e-08	Solyc08g005800.3	-1.10288	6.41e-09	0.996302	2.04852e-05
Lnc_000162	-1.35252	3.64e-08	Solyc08g023280.3	-1.08735	3.54e-13	0.995407	3.15947e-05
Lnc_000162	-1.35252	3.64e-08	Solyc08g065140.1	1.01851	0.000860102	0.994166	5.09504e-05
Lnc_000162	-1.35252	3.64e-08	Solyc08g065150.1	1.01851	0.000860102	0.993329	6.65972e-05
Lnc_000162	-1.35252	3.64e-08	Solyc08g066510.3	-1.63911	0.0038428	0.998354	4.06209e-06
Lnc_000162	-1.35252	3.64e-08	Solyc08g066740.3	1.90974	2.91e-10	0.998936	1.69777e-06
Lnc_000162	-1.35252	3.64e-08	Solyc08g077550.3	-1.30582	1.08e-10	0.99692	1.42119e-05
Lnc_000162	-1.35252	3.64e-08	Solyc08g077990.3	3.00511	8.36e-36	0.993694	5.95252e-05
Lnc_000162	-1.35252	3.64e-08	Solyc08g078900.1	1.27144	0.000740617	0.992798	7.76151e-05
Lnc_000162	-1.35252	3.64e-08	Solyc08g079090.3	-2.15152	4.2e-05	0.993377	6.56546e-05
Lnc_000162	-1.35252	3.64e-08	Solyc08g080060.3	-1.2358	1.86e-12	0.998092	5.4585e-06
Lnc_000162	-1.35252	3.64e-08	Solyc08g080430.2	-1.08562	5.7e-09	0.990143	0.00014525
Lnc_000162	-1.35252	3.64e-08	Solyc08g080780.3	-1.33559	4.12e-10	0.994961	3.80264e-05
Lnc_000162	-1.35252	3.64e-08	Solyc09g009860.1	-1.10077	3.5e-06	0.998942	1.67786e-06
Lnc_000162	-1.35252	3.64e-08	Solyc09g011820.3	-1.06987	1.05e-09	0.996534	1.80026e-05
Lnc_000162	-1.35252	3.64e-08	Solyc09g014490.3	-1.3747	2.79e-11	0.991079	0.000119008
Lnc_000162	-1.35252	3.64e-08	Solyc09g014610.3	-1.3747	2.79e-11	0.997579	8.78726e-06
Lnc_000162	-1.35252	3.64e-08	Solyc09g061940.2	-1.15599	2.43e-09	0.997991	6.04949e-06
Lnc_000162	-1.35252	3.64e-08	Solyc09g075330.3	1.26794	0.00314906	0.99669	1.64126e-05
Lnc_000162	-1.35252	3.64e-08	Solyc09g075350.3	-1.71299	2.07e-08	0.994578	4.40162e-05
Lnc_000162	-1.35252	3.64e-08	Solyc09g075750.1	-1.15081	9.9e-13	0.998664	2.67643e-06
Lnc_000162	-1.35252	3.64e-08	Solyc09g083400.3	-3.45046	3.03e-64	0.998382	3.9246e-06
Lnc_000162	-1.35252	3.64e-08	Solyc09g090680.3	-1.11452	4.81e-08	0.999237	8.72277e-07
Lnc_000162	-1.35252	3.64e-08	Solyc09g092520.3	-1.02909	2.95e-07	0.997523	9.19543e-06
Lnc_000162	-1.35252	3.64e-08	Solyc10g005000.3	-1.25083	2.93e-11	0.994235	4.97582e-05
Lnc_000162	-1.35252	3.64e-08	Solyc10g037880.2	1.62988	3.66e-10	0.994002	5.38639e-05
Lnc_000162	-1.35252	3.64e-08	Solyc10g079320.2	-1.29064	9.21e-09	0.993298	6.72272e-05
Lnc_000162	-1.35252	3.64e-08	Solyc10g081730.2	-1.2123	1.69e-09	0.997895	6.64109e-06
Lnc_000162	-1.35252	3.64e-08	Solyc10g083650.1	-1.03627	5.08e-09	0.990163	0.000144665
Lnc_000162	-1.35252	3.64e-08	Solyc10g083740.2	-1.03335	9.92e-10	0.998438	3.66008e-06
Lnc_000162	-1.35252	3.64e-08	Solyc10g084780.2	-1.71064	0.00224983	0.995782	2.66545e-05
Lnc_000162	-1.35252	3.64e-08	Solyc11g006040.2	1.23664	1.95e-06	0.999843	3.69064e-08
Lnc_000162	-1.35252	3.64e-08	Solyc11g010620.2	-2.50445	7.86e-27	0.990851	0.000125161
Lnc_000162	-1.35252	3.64e-08	Solyc11g011010.1	-1.4505	1.05e-11	0.996476	1.86089e-05
Lnc_000162	-1.35252	3.64e-08	Solyc11g011210.2	-1.40893	1.92e-15	0.997183	1.18905e-05
Lnc_000162	-1.35252	3.64e-08	Solyc11g012210.1	-1.02718	2.61e-05	0.990886	0.000124232
Lnc_000162	-1.35252	3.64e-08	Solyc11g020960.2	-2.78955	1.06e-32	0.997872	6.7887e-06
Lnc_000162	-1.35252	3.64e-08	Solyc11g031950.1	-1.00754	4.29e-07	0.996283	2.06982e-05
Lnc_000162	-1.35252	3.64e-08	Solyc11g039570.2	-1.00754	4.29e-07	0.992785	7.79001e-05
Lnc_000162	-1.35252	3.64e-08	Solyc11g040140.2	-2.06232	0.00173658	0.997495	9.40531e-06
Lnc_000162	-1.35252	3.64e-08	Solyc11g066520.2	2.04517	6.66e-10	0.992517	8.37868e-05
Lnc_000162	-1.35252	3.64e-08	Solyc11g067320.1	-2.32605	1.26e-11	0.992621	8.14827e-05
Lnc_000162	-1.35252	3.64e-08	Solyc11g067330.1	-2.32605	1.26e-11	0.994424	4.65568e-05
Lnc_000162	-1.35252	3.64e-08	Solyc11g067340.1	-2.32605	1.26e-11	0.994424	4.65568e-05
Lnc_000162	-1.35252	3.64e-08	Solyc11g067350.2	-2.32605	1.26e-11	0.994424	4.65568e-05
Lnc_000162	-1.35252	3.64e-08	Solyc11g071970.2	-1.04091	8.99e-10	0.998542	3.18584e-06
Lnc_000162	-1.35252	3.64e-08	Solyc11g072800.2	-1.11143	1.5e-09	0.993751	5.84457e-05
Lnc_000162	-1.35252	3.64e-08	Solyc12g005370.2	-1.26546	1.81e-16	0.998934	1.70504e-06
Lnc_000162	-1.35252	3.64e-08	Solyc12g005710.2	-2.71263	2.24e-34	0.995406	3.16045e-05
Lnc_000162	-1.35252	3.64e-08	Solyc12g008490.2	-1.48732	1.3e-11	0.994444	4.62205e-05
Lnc_000162	-1.35252	3.64e-08	Solyc12g009860.2	1.48516	0.000136244	0.992696	7.98321e-05
Lnc_000162	-1.35252	3.64e-08	Solyc12g011030.2	-2.21029	2.96e-05	0.997247	1.13582e-05
Lnc_000162	-1.35252	3.64e-08	Solyc12g011140.2	-2.21029	2.96e-05	0.997915	6.51369e-06
Lnc_000162	-1.35252	3.64e-08	Solyc12g011150.1	-2.21029	2.96e-05	0.997915	6.51369e-06
Lnc_000162	-1.35252	3.64e-08	Solyc12g015690.2	-2.01785	0.000410963	0.995307	3.29875e-05
Lnc_000162	-1.35252	3.64e-08	Solyc12g037930.2	1.59516	3.56e-11	0.990443	0.000136569
Lnc_000162	-1.35252	3.64e-08	Solyc12g056260.1	-1.34277	3.96e-10	0.998053	5.68523e-06
Lnc_000162	-1.35252	3.64e-08	Solyc12g094530.1	-1.29223	2.22e-05	0.99934	6.53354e-07
Lnc_000162	-1.35252	3.64e-08	Solyc12g095790.2	-1.00233	8.33e-09	0.992548	8.30981e-05
Lnc_000162	-1.35252	3.64e-08	Solyc12g096620.1	-1.72059	6.06e-10	0.995219	3.42292e-05
Lnc_000162	-1.35252	3.64e-08	Solyc12g100220.2	1.1764	0.0325163	0.996506	1.82899e-05
Lnc_000162	-1.35252	3.64e-08	Solyc12g100230.1	1.1764	0.0325163	0.991641	0.000104526
Lnc_000170	2.31837	0.0200096	Solyc01g109920.2	-1.1115	4.52e-10	0.992248	8.99077e-05
Lnc_000170	2.31837	0.0200096	Solyc02g062710.1	1.84805	1.82e-08	0.992491	8.43585e-05
Lnc_000170	2.31837	0.0200096	Solyc03g033840.3	-1.15851	3.16e-11	0.992898	7.54719e-05
Lnc_000170	2.31837	0.0200096	Solyc03g117800.3	1.31451	3.5e-06	0.990798	0.000126619
Lnc_000170	2.31837	0.0200096	Solyc05g015490.3	1.5945	1.62e-05	0.994084	5.23984e-05
Lnc_000170	2.31837	0.0200096	Solyc05g056180.1	-1.01168	1.93e-09	0.995569	2.94127e-05
Lnc_000170	2.31837	0.0200096	Solyc06g005390.1	-1.09251	0.000374978	-0.992673	8.03214e-05
Lnc_000170	2.31837	0.0200096	Solyc06g061110.2	1.03183	0.0123672	0.997626	8.44744e-06
Lnc_000170	2.31837	0.0200096	Solyc06g069040.3	-1.14636	3.96e-09	0.997194	1.18003e-05
Lnc_000170	2.31837	0.0200096	Solyc08g068850.3	-1.5875	1.7e-12	0.994087	5.23362e-05
Lnc_000170	2.31837	0.0200096	Solyc09g018740.1	-1.48672	1.3e-17	0.991711	0.000102778
Lnc_000170	2.31837	0.0200096	Solyc09g065540.3	1.20604	6.19e-05	0.990982	0.000121617
Lnc_000170	2.31837	0.0200096	Solyc09g092710.3	-1.02909	2.95e-07	0.991092	0.000118662
Lnc_000170	2.31837	0.0200096	Solyc09g092715.1	-1.02909	2.95e-07	0.991092	0.000118662
Lnc_000170	2.31837	0.0200096	Solyc09g092720.3	-1.02909	2.95e-07	0.991092	0.000118662
Lnc_000170	2.31837	0.0200096	Solyc12g008850.2	1.08885	1.98e-06	0.991159	0.000116903
Lnc_000171	-1.65355	7.13e-07	Solyc00g072100.3	1.0616	0.00579955	-0.995934	2.47709e-05
Lnc_000171	-1.65355	7.13e-07	Solyc00g136560.3	1.38661	1.03e-05	-0.991394	0.000110784
Lnc_000171	-1.65355	7.13e-07	Solyc01g005160.3	-2.54438	3.09e-34	0.995225	3.41462e-05
Lnc_000171	-1.65355	7.13e-07	Solyc01g005300.3	1.17279	0.00275854	-0.994009	5.37224e-05
Lnc_000171	-1.65355	7.13e-07	Solyc01g006400.3	-1.99029	3.79e-22	0.994114	5.18667e-05
Lnc_000171	-1.65355	7.13e-07	Solyc01g007000.3	1.03013	0.00936369	0.994591	4.38044e-05
Lnc_000171	-1.65355	7.13e-07	Solyc01g007010.2	1.03013	0.00936369	0.994591	4.38044e-05
Lnc_000171	-1.65355	7.13e-07	Solyc01g007020.3	1.03013	0.00936369	0.990287	0.000141044
Lnc_000171	-1.65355	7.13e-07	Solyc01g007025.1	-2.09174	2.65e-29	0.990287	0.000141044
Lnc_000171	-1.65355	7.13e-07	Solyc01g007030.3	-2.09174	2.65e-29	0.990287	0.000141044
Lnc_000171	-1.65355	7.13e-07	Solyc01g007040.3	-2.09174	2.65e-29	0.990287	0.000141044
Lnc_000171	-1.65355	7.13e-07	Solyc01g009490.1	2.08151	1.26e-14	-0.993956	5.46793e-05
Lnc_000171	-1.65355	7.13e-07	Solyc01g010190.2	-1.88019	1.08e-18	-0.992353	8.74897e-05
Lnc_000171	-1.65355	7.13e-07	Solyc01g010200.3	-1.88019	1.08e-18	-0.991583	0.000105963
Lnc_000171	-1.65355	7.13e-07	Solyc01g065980.3	2.267	6.1e-17	-0.995267	3.35457e-05
Lnc_000171	-1.65355	7.13e-07	Solyc01g066270.3	1.74002	1.17e-07	-0.994436	4.63484e-05
Lnc_000171	-1.65355	7.13e-07	Solyc01g066290.2	1.74002	1.17e-07	-0.994436	4.63484e-05
Lnc_000171	-1.65355	7.13e-07	Solyc01g066430.3	-1.11697	4.37e-10	0.99492	3.86415e-05
Lnc_000171	-1.65355	7.13e-07	Solyc01g068380.3	1.85974	1.62e-13	-0.993191	6.93792e-05
Lnc_000171	-1.65355	7.13e-07	Solyc01g068410.3	1.85974	1.62e-13	-0.994137	5.14692e-05
Lnc_000171	-1.65355	7.13e-07	Solyc01g080030.2	-1.08879	2.37e-06	-0.995096	3.60165e-05
Lnc_000171	-1.65355	7.13e-07	Solyc01g081340.3	-1.08879	2.37e-06	-0.992479	8.46422e-05
Lnc_000171	-1.65355	7.13e-07	Solyc01g081610.3	-1.08879	2.37e-06	-0.998408	3.80072e-06
Lnc_000171	-1.65355	7.13e-07	Solyc01g087010.3	-1.10342	5.78e-11	0.990504	0.000134819
Lnc_000171	-1.65355	7.13e-07	Solyc01g090320.3	-3.00677	3.43e-31	0.992758	7.84818e-05
Lnc_000171	-1.65355	7.13e-07	Solyc01g094550.3	1.37546	2.82e-10	0.99047	0.0001358
Lnc_000171	-1.65355	7.13e-07	Solyc01g094725.1	1.79862	4.18e-32	-0.99475	4.12734e-05
Lnc_000171	-1.65355	7.13e-07	Solyc01g094750.3	1.79862	4.18e-32	-0.99475	4.12734e-05
Lnc_000171	-1.65355	7.13e-07	Solyc01g096280.2	1.1566	0.000406123	-0.993819	5.71883e-05
Lnc_000171	-1.65355	7.13e-07	Solyc01g096880.3	1.52459	1.31e-08	-0.995721	2.7422e-05
Lnc_000171	-1.65355	7.13e-07	Solyc01g096890.3	1.52459	1.31e-08	-0.995721	2.7422e-05
Lnc_000171	-1.65355	7.13e-07	Solyc01g100040.3	-1.1022	2.32e-10	0.993758	5.83143e-05
Lnc_000171	-1.65355	7.13e-07	Solyc01g100750.2	1.09083	0.0005578	-0.992124	9.281e-05
Lnc_000171	-1.65355	7.13e-07	Solyc01g100770.2	1.09083	0.0005578	-0.992124	9.281e-05
Lnc_000171	-1.65355	7.13e-07	Solyc01g101050.3	-1.20697	3.74e-10	0.993021	7.28979e-05
Lnc_000171	-1.65355	7.13e-07	Solyc01g103030.3	2.19206	8.12e-17	-0.99493	3.8497e-05
Lnc_000171	-1.65355	7.13e-07	Solyc01g103060.3	2.19206	8.12e-17	-0.99303	7.2708e-05
Lnc_000171	-1.65355	7.13e-07	Solyc01g103070.2	2.19206	8.12e-17	-0.99303	7.2708e-05
Lnc_000171	-1.65355	7.13e-07	Solyc01g105770.2	3.71879	1.71e-60	-0.99081	0.000126292
Lnc_000171	-1.65355	7.13e-07	Solyc01g108850.2	1.25703	3.15e-09	-0.996585	1.74755e-05
Lnc_000171	-1.65355	7.13e-07	Solyc01g109150.4	1.15617	0.00038355	0.99332	6.67855e-05
Lnc_000171	-1.65355	7.13e-07	Solyc01g109470.3	2.44481	2.55e-25	-0.994492	4.54244e-05
Lnc_000171	-1.65355	7.13e-07	Solyc01g111980.3	-1.37321	1e-15	0.991479	0.000108591
Lnc_000171	-1.65355	7.13e-07	Solyc02g014730.3	1.073	0.0204716	-0.990139	0.000145366
Lnc_000171	-1.65355	7.13e-07	Solyc02g062460.3	1.91106	2.35e-13	-0.995647	2.83878e-05
Lnc_000171	-1.65355	7.13e-07	Solyc02g062463.1	1.91106	2.35e-13	-0.995647	2.83878e-05
Lnc_000171	-1.65355	7.13e-07	Solyc02g063420.3	1.22055	0.000483911	-0.992756	7.85302e-05
Lnc_000171	-1.65355	7.13e-07	Solyc02g065000.1	1.44664	0.000147772	-0.996473	1.86338e-05
Lnc_000171	-1.65355	7.13e-07	Solyc02g065550.3	-1.61579	2.63e-13	0.992607	8.17851e-05
Lnc_000171	-1.65355	7.13e-07	Solyc02g065555.1	-1.61579	2.63e-13	0.992607	8.17851e-05
Lnc_000171	-1.65355	7.13e-07	Solyc02g067320.2	-1.61579	2.63e-13	-0.990158	0.000144823
Lnc_000171	-1.65355	7.13e-07	Solyc02g067330.1	-1.61579	2.63e-13	-0.990158	0.000144823
Lnc_000171	-1.65355	7.13e-07	Solyc02g067660.3	-2.04773	1.18e-35	0.991626	0.000104892
Lnc_000171	-1.65355	7.13e-07	Solyc02g067740.3	-2.04773	1.18e-35	-0.990619	0.000131583
Lnc_000171	-1.65355	7.13e-07	Solyc02g067750.3	-2.04773	1.18e-35	-0.990619	0.000131583
Lnc_000171	-1.65355	7.13e-07	Solyc02g068040.3	1.70452	1.74e-05	-0.99265	8.08371e-05
Lnc_000171	-1.65355	7.13e-07	Solyc02g068680.1	-1.94306	2.68e-20	0.998286	4.40396e-06
Lnc_000171	-1.65355	7.13e-07	Solyc02g070430.3	-1.43767	3.2e-12	-0.992274	8.93124e-05
Lnc_000171	-1.65355	7.13e-07	Solyc02g071350.3	1.52871	4.2e-10	-0.996621	1.71054e-05
Lnc_000171	-1.65355	7.13e-07	Solyc02g071560.3	1.52871	4.2e-10	0.994367	4.75053e-05
Lnc_000171	-1.65355	7.13e-07	Solyc02g073571.1	-1.04972	1.14e-10	-0.995522	3.00335e-05
Lnc_000171	-1.65355	7.13e-07	Solyc02g074590.3	-1.04972	1.14e-10	-0.995522	3.00335e-05
Lnc_000171	-1.65355	7.13e-07	Solyc02g077880.3	1.11049	0.00618992	-0.996225	2.13523e-05
Lnc_000171	-1.65355	7.13e-07	Solyc02g078250.3	1.11049	0.00618992	-0.995759	2.69455e-05
Lnc_000171	-1.65355	7.13e-07	Solyc02g078620.1	-1.15595	1.36e-09	0.990069	0.000147434
Lnc_000171	-1.65355	7.13e-07	Solyc02g078900.3	-1.80253	4.48e-19	0.990854	0.000125093
Lnc_000171	-1.65355	7.13e-07	Solyc02g079290.3	1.74869	1.32e-07	-0.99915	1.08359e-06
Lnc_000171	-1.65355	7.13e-07	Solyc02g079295.1	1.74869	1.32e-07	-0.99915	1.08359e-06
Lnc_000171	-1.65355	7.13e-07	Solyc02g079360.2	-3.92685	1.36e-86	0.990524	0.000134266
Lnc_000171	-1.65355	7.13e-07	Solyc02g082060.2	-1.28877	2.49e-08	-0.993028	7.2742e-05
Lnc_000171	-1.65355	7.13e-07	Solyc02g083000.1	1.86583	6.6e-11	-0.997646	8.30608e-06
Lnc_000171	-1.65355	7.13e-07	Solyc02g086300.3	-3.78811	7.84e-72	0.992861	7.62582e-05
Lnc_000171	-1.65355	7.13e-07	Solyc02g089115.1	-1.14732	2.9e-09	-0.992719	7.93225e-05
Lnc_000171	-1.65355	7.13e-07	Solyc02g089120.3	-1.14732	2.9e-09	-0.992719	7.93225e-05
Lnc_000171	-1.65355	7.13e-07	Solyc02g089450.1	1.75154	6.8e-20	-0.994294	4.87448e-05
Lnc_000171	-1.65355	7.13e-07	Solyc02g089460.1	1.75154	6.8e-20	-0.994294	4.87448e-05
Lnc_000171	-1.65355	7.13e-07	Solyc02g090490.3	-1.25073	5.46e-11	0.994175	5.08023e-05
Lnc_000171	-1.65355	7.13e-07	Solyc02g094400.3	-3.06761	2.03e-31	0.992426	8.58202e-05
Lnc_000171	-1.65355	7.13e-07	Solyc03g005320.3	1.49297	1.49e-08	-0.996389	1.95393e-05
Lnc_000171	-1.65355	7.13e-07	Solyc03g006640.3	1.00838	0.0106179	-0.99801	5.93485e-06
Lnc_000171	-1.65355	7.13e-07	Solyc03g007695.1	1.94567	1.87e-08	-0.994986	3.76506e-05
Lnc_000171	-1.65355	7.13e-07	Solyc03g026050.3	1.36006	2.43e-06	-0.99371	5.92246e-05
Lnc_000171	-1.65355	7.13e-07	Solyc03g026230.1	1.36006	2.43e-06	0.9963	2.05112e-05
Lnc_000171	-1.65355	7.13e-07	Solyc03g033330.3	3.56111	1.19e-66	-0.995558	2.95522e-05
Lnc_000171	-1.65355	7.13e-07	Solyc03g034417.1	-1.84581	1.79e-15	-0.997294	1.09701e-05
Lnc_000171	-1.65355	7.13e-07	Solyc03g034430.1	1.19249	0.000374003	-0.997294	1.09701e-05
Lnc_000171	-1.65355	7.13e-07	Solyc03g043850.3	1.58354	1.14e-08	-0.996555	1.77787e-05
Lnc_000171	-1.65355	7.13e-07	Solyc03g081330.1	-2.58236	3.37e-20	0.997278	1.11e-05
Lnc_000171	-1.65355	7.13e-07	Solyc03g082470.3	-1.66414	9.27e-22	0.991798	0.000100634
Lnc_000171	-1.65355	7.13e-07	Solyc03g082950.3	3.28464	1.85e-30	-0.993686	5.96786e-05
Lnc_000171	-1.65355	7.13e-07	Solyc03g083680.1	-1.79922	9.19e-23	0.994087	5.23391e-05
Lnc_000171	-1.65355	7.13e-07	Solyc03g083690.1	-2.45934	3.14e-30	0.992668	8.04446e-05
Lnc_000171	-1.65355	7.13e-07	Solyc03g083730.1	-3.17949	2.24e-37	0.995205	3.44379e-05
Lnc_000171	-1.65355	7.13e-07	Solyc03g095780.2	-1.65935	1.76e-15	0.997231	1.14925e-05
Lnc_000171	-1.65355	7.13e-07	Solyc03g095845.1	1.01283	0.000632094	-0.990928	0.000123078
Lnc_000171	-1.65355	7.13e-07	Solyc03g096050.3	-2.51992	1.91e-42	0.993805	5.74535e-05
Lnc_000171	-1.65355	7.13e-07	Solyc03g096410.1	-1.40792	2.82e-13	0.99255	8.30503e-05
Lnc_000171	-1.65355	7.13e-07	Solyc03g096430.1	-1.40792	2.82e-13	0.99255	8.30503e-05
Lnc_000171	-1.65355	7.13e-07	Solyc03g096670.3	2.72613	6.66e-23	-0.99216	9.1952e-05
Lnc_000171	-1.65355	7.13e-07	Solyc03g097500.3	2.8489	2.01e-30	-0.99017	0.000144456
Lnc_000171	-1.65355	7.13e-07	Solyc03g098260.2	2.45059	7.3e-29	-0.996487	1.84943e-05
Lnc_000171	-1.65355	7.13e-07	Solyc03g098660.3	-1.72578	1.52e-17	0.998023	5.85844e-06
Lnc_000171	-1.65355	7.13e-07	Solyc03g114430.1	-1.34482	2.36e-14	-0.993702	5.93731e-05
Lnc_000171	-1.65355	7.13e-07	Solyc03g114597.1	-1.34482	2.36e-14	0.990027	0.000148688
Lnc_000171	-1.65355	7.13e-07	Solyc03g114600.3	-1.34482	2.36e-14	0.990027	0.000148688
Lnc_000171	-1.65355	7.13e-07	Solyc03g114710.3	-1.34482	2.36e-14	0.992194	9.11624e-05
Lnc_000171	-1.65355	7.13e-07	Solyc03g115960.3	1.12607	0.0181575	-0.99365	6.03564e-05
Lnc_000171	-1.65355	7.13e-07	Solyc03g116030.3	-1.44615	6.63e-16	0.991754	0.000101721
Lnc_000171	-1.65355	7.13e-07	Solyc03g119340.3	-1.99207	1.41e-22	0.996009	2.38605e-05
Lnc_000171	-1.65355	7.13e-07	Solyc03g119350.2	-1.99207	1.41e-22	0.996009	2.38605e-05
Lnc_000171	-1.65355	7.13e-07	Solyc03g120020.3	-1.04626	3.89e-07	-0.994057	5.28755e-05
Lnc_000171	-1.65355	7.13e-07	Solyc03g121100.3	-2.0482	3.65e-27	0.99017	0.000144463
Lnc_000171	-1.65355	7.13e-07	Solyc03g123540.3	1.4168	0.000229423	-0.996566	1.76636e-05
Lnc_000171	-1.65355	7.13e-07	Solyc04g005240.2	-2.41827	6.62e-36	-0.994856	3.96247e-05
Lnc_000171	-1.65355	7.13e-07	Solyc04g005250.3	-2.41827	6.62e-36	-0.994856	3.96247e-05
Lnc_000171	-1.65355	7.13e-07	Solyc04g005255.1	-2.41827	6.62e-36	-0.994856	3.96247e-05
Lnc_000171	-1.65355	7.13e-07	Solyc04g006960.3	-1.5641	9.26e-08	-0.99388	5.60722e-05
Lnc_000171	-1.65355	7.13e-07	Solyc04g006970.3	-1.5641	9.26e-08	-0.997104	1.25667e-05
Lnc_000171	-1.65355	7.13e-07	Solyc04g009640.3	-1.69738	0.0121646	-0.998467	3.52384e-06
Lnc_000171	-1.65355	7.13e-07	Solyc04g014280.1	2.70401	3.35e-48	-0.994191	5.0527e-05
Lnc_000171	-1.65355	7.13e-07	Solyc04g051540.3	1.43466	5.69e-08	-0.990221	0.000142982
Lnc_000171	-1.65355	7.13e-07	Solyc04g053130.3	1.97005	9.43e-16	-0.991044	0.000119955
Lnc_000171	-1.65355	7.13e-07	Solyc04g054830.3	-1.90011	1.27e-29	-0.992985	7.36516e-05
Lnc_000171	-1.65355	7.13e-07	Solyc04g058160.2	-1.44639	2.17e-17	-0.996333	2.01496e-05
Lnc_000171	-1.65355	7.13e-07	Solyc04g071030.1	-1.21736	2.16e-11	0.995454	3.09563e-05
Lnc_000171	-1.65355	7.13e-07	Solyc04g071890.3	-1.09123	5.86e-08	-0.991925	9.75421e-05
Lnc_000171	-1.65355	7.13e-07	Solyc04g079730.1	-2.87286	1.8e-35	0.997358	1.04605e-05
Lnc_000171	-1.65355	7.13e-07	Solyc04g080750.3	1.05899	0.00120108	-0.991575	0.000106181
Lnc_000171	-1.65355	7.13e-07	Solyc04g081480.2	-1.50127	9.51e-09	-0.995576	2.93201e-05
Lnc_000171	-1.65355	7.13e-07	Solyc04g081810.3	-1.07997	1.16e-09	0.992708	7.95721e-05
Lnc_000171	-1.65355	7.13e-07	Solyc04g082120.3	2.03811	7.69e-12	0.995577	2.93073e-05
Lnc_000171	-1.65355	7.13e-07	Solyc05g006220.3	-1.57998	1.41e-07	0.997074	1.28261e-05
Lnc_000171	-1.65355	7.13e-07	Solyc05g006870.3	-1.29709	1.99e-11	-0.99147	0.000108839
Lnc_000171	-1.65355	7.13e-07	Solyc05g009420.1	-1.13572	9.21e-10	0.992876	7.59453e-05
Lnc_000171	-1.65355	7.13e-07	Solyc05g011980.3	-2.66854	5.19e-26	-0.996925	1.41666e-05
Lnc_000171	-1.65355	7.13e-07	Solyc05g015390.3	1.5945	1.62e-05	-0.996713	1.61846e-05
Lnc_000171	-1.65355	7.13e-07	Solyc05g018820.1	1.46596	0.0207058	0.994117	5.18113e-05
Lnc_000171	-1.65355	7.13e-07	Solyc05g046320.1	1.44597	4.22e-06	-0.990364	0.000138842
Lnc_000171	-1.65355	7.13e-07	Solyc05g051450.2	1.54884	4.46e-10	0.990748	0.000128001
Lnc_000171	-1.65355	7.13e-07	Solyc05g051800.3	1.54884	4.46e-10	0.992406	8.62842e-05
Lnc_000171	-1.65355	7.13e-07	Solyc05g051810.1	1.54884	4.46e-10	0.990709	0.000129094
Lnc_000171	-1.65355	7.13e-07	Solyc05g052880.3	1.70859	1.61e-10	-0.996961	1.38413e-05
Lnc_000171	-1.65355	7.13e-07	Solyc05g053030.1	1.70859	1.61e-10	-0.994803	4.04445e-05
Lnc_000171	-1.65355	7.13e-07	Solyc05g055330.3	-2.26764	7.77e-35	-0.99006	0.000147712
Lnc_000171	-1.65355	7.13e-07	Solyc06g005280.1	-2.03577	1.04e-24	0.994228	4.98835e-05
Lnc_000171	-1.65355	7.13e-07	Solyc06g009010.1	-1.66822	5.22e-12	-0.997147	1.21945e-05
Lnc_000171	-1.65355	7.13e-07	Solyc06g009080.2	3.40086	2.04e-37	-0.996462	1.87501e-05
Lnc_000171	-1.65355	7.13e-07	Solyc06g009090.1	3.40086	2.04e-37	-0.996462	1.87501e-05
Lnc_000171	-1.65355	7.13e-07	Solyc06g009110.3	3.40086	2.04e-37	0.99316	7.00115e-05
Lnc_000171	-1.65355	7.13e-07	Solyc06g031710.3	-1.74695	1.85e-21	0.993708	5.92562e-05
Lnc_000171	-1.65355	7.13e-07	Solyc06g035710.1	1.76062	2.08e-09	-0.992417	8.60326e-05
Lnc_000171	-1.65355	7.13e-07	Solyc06g048820.1	-1.31672	2.28e-13	0.994147	5.12915e-05
Lnc_000171	-1.65355	7.13e-07	Solyc06g050630.3	-1.06853	1.13e-10	0.996651	1.68006e-05
Lnc_000171	-1.65355	7.13e-07	Solyc06g050870.3	2.45392	1.11e-30	-0.996129	2.24505e-05
Lnc_000171	-1.65355	7.13e-07	Solyc06g052070.3	-1.17088	2.11e-10	0.991922	9.76204e-05
Lnc_000171	-1.65355	7.13e-07	Solyc06g053620.3	1.88715	9.62e-11	0.991017	0.000120675
Lnc_000171	-1.65355	7.13e-07	Solyc06g053625.1	1.88715	9.62e-11	0.991017	0.000120675
Lnc_000171	-1.65355	7.13e-07	Solyc06g060410.3	1.23953	1.46e-05	-0.99406	5.2828e-05
Lnc_000171	-1.65355	7.13e-07	Solyc06g060970.2	-2.79925	3.83e-25	-0.992909	7.52492e-05
Lnc_000171	-1.65355	7.13e-07	Solyc06g061200.1	1.03183	0.0123672	0.993474	6.37388e-05
Lnc_000171	-1.65355	7.13e-07	Solyc06g062920.3	-2.49313	4.22e-30	0.996508	1.82652e-05
Lnc_000171	-1.65355	7.13e-07	Solyc06g066420.3	1.7125	1.36e-20	-0.993082	7.16129e-05
Lnc_000171	-1.65355	7.13e-07	Solyc06g069070.1	3.14229	9.54e-46	-0.993109	7.10581e-05
Lnc_000171	-1.65355	7.13e-07	Solyc06g071810.1	-1.21628	5.23e-11	0.990131	0.000145621
Lnc_000171	-1.65355	7.13e-07	Solyc06g072390.3	-2.73594	5.26e-53	0.99027	0.000141546
Lnc_000171	-1.65355	7.13e-07	Solyc06g072400.2	-2.73594	5.26e-53	0.99027	0.000141546
Lnc_000171	-1.65355	7.13e-07	Solyc06g072403.1	-2.73594	5.26e-53	0.99027	0.000141546
Lnc_000171	-1.65355	7.13e-07	Solyc06g072407.1	-2.73594	5.26e-53	0.99027	0.000141546
Lnc_000171	-1.65355	7.13e-07	Solyc06g074530.1	-2.32417	2.36e-19	0.990778	0.000127165
Lnc_000171	-1.65355	7.13e-07	Solyc06g075120.1	-2.09044	0.0183325	0.990866	0.000124778
Lnc_000171	-1.65355	7.13e-07	Solyc06g075130.3	-2.09044	0.0183325	0.990866	0.000124778
Lnc_000171	-1.65355	7.13e-07	Solyc06g075610.1	-1.48651	1.6e-14	0.992576	8.24707e-05
Lnc_000171	-1.65355	7.13e-07	Solyc06g076050.3	-2.0616	7.7e-25	0.990387	0.000138181
Lnc_000171	-1.65355	7.13e-07	Solyc06g076080.2	-1.5208	5.27e-19	0.992315	8.83684e-05
Lnc_000171	-1.65355	7.13e-07	Solyc06g076300.3	-3.03056	4.53e-62	0.993258	6.80249e-05
Lnc_000171	-1.65355	7.13e-07	Solyc06g076670.3	-1.54368	4.49e-12	-0.992979	7.37697e-05
Lnc_000171	-1.65355	7.13e-07	Solyc06g076700.1	-1.54368	4.49e-12	-0.992979	7.37697e-05
Lnc_000171	-1.65355	7.13e-07	Solyc06g082440.1	-1.43764	5e-14	0.994432	4.64134e-05
Lnc_000171	-1.65355	7.13e-07	Solyc07g006000.3	-1.34412	6.7e-25	0.992694	7.98701e-05
Lnc_000171	-1.65355	7.13e-07	Solyc07g006570.3	-1.17342	1.77e-09	0.992126	9.27557e-05
Lnc_000171	-1.65355	7.13e-07	Solyc07g006590.1	1.97334	1.7e-09	-0.995986	2.41345e-05
Lnc_000171	-1.65355	7.13e-07	Solyc07g006600.1	2.1468	2.56e-14	-0.998169	5.02641e-06
Lnc_000171	-1.65355	7.13e-07	Solyc07g006630.3	2.1468	2.56e-14	0.992955	7.42667e-05
Lnc_000171	-1.65355	7.13e-07	Solyc07g007070.1	1.37795	2.44e-07	-0.996707	1.62494e-05
Lnc_000171	-1.65355	7.13e-07	Solyc07g007990.3	1.44385	3.08e-06	-0.991642	0.000104495
Lnc_000171	-1.65355	7.13e-07	Solyc07g008130.3	1.53766	1.39e-05	-0.99471	4.19006e-05
Lnc_000171	-1.65355	7.13e-07	Solyc07g008140.3	1.27802	8.47e-05	-0.995856	2.57282e-05
Lnc_000171	-1.65355	7.13e-07	Solyc07g008360.2	2.98294	5.23e-25	-0.995175	3.48617e-05
Lnc_000171	-1.65355	7.13e-07	Solyc07g008930.1	-1.25096	3.42e-12	0.996182	2.18419e-05
Lnc_000171	-1.65355	7.13e-07	Solyc07g017570.2	1.03269	0.0225047	-0.99046	0.000136082
Lnc_000171	-1.65355	7.13e-07	Solyc07g017980.1	-1.31131	0.00636717	-0.996321	2.02763e-05
Lnc_000171	-1.65355	7.13e-07	Solyc07g021340.3	-1.07888	1.18e-08	-0.993004	7.32501e-05
Lnc_000171	-1.65355	7.13e-07	Solyc07g040710.3	2.19594	2.99e-18	0.99588	2.5428e-05
Lnc_000171	-1.65355	7.13e-07	Solyc07g045100.1	-1.26815	1.86e-13	0.994033	5.32986e-05
Lnc_000171	-1.65355	7.13e-07	Solyc07g049300.3	-1.50783	8.46e-17	0.991035	0.000120198
Lnc_000171	-1.65355	7.13e-07	Solyc07g052910.3	1.93052	2.91e-09	-0.996459	1.87831e-05
Lnc_000171	-1.65355	7.13e-07	Solyc07g054470.1	2.63186	2.41e-29	-0.992202	9.09787e-05
Lnc_000171	-1.65355	7.13e-07	Solyc07g054725.1	1.46928	1.55e-06	-0.996399	1.94271e-05
Lnc_000171	-1.65355	7.13e-07	Solyc07g054730.1	1.46928	1.55e-06	-0.996399	1.94271e-05
Lnc_000171	-1.65355	7.13e-07	Solyc07g054745.1	1.66098	5.5e-15	-0.997498	9.37987e-06
Lnc_000171	-1.65355	7.13e-07	Solyc07g056410.3	2.66083	3.65e-35	-0.99491	3.87908e-05
Lnc_000171	-1.65355	7.13e-07	Solyc07g061870.1	5.30199	2.95e-98	0.991141	0.000117373
Lnc_000171	-1.65355	7.13e-07	Solyc07g061880.2	5.30199	2.95e-98	0.991141	0.000117373
Lnc_000171	-1.65355	7.13e-07	Solyc07g061920.3	5.30199	2.95e-98	-0.995831	2.60285e-05
Lnc_000171	-1.65355	7.13e-07	Solyc07g062970.3	-1.07175	2.06e-08	-0.993323	6.672e-05
Lnc_000171	-1.65355	7.13e-07	Solyc07g063940.2	-1.11873	1.42e-11	0.994309	4.84933e-05
Lnc_000171	-1.65355	7.13e-07	Solyc07g065810.2	-1.64715	7.33e-15	-0.990542	0.000133752
Lnc_000171	-1.65355	7.13e-07	Solyc08g006410.3	2.56256	3.19e-25	-0.994342	4.79275e-05
Lnc_000171	-1.65355	7.13e-07	Solyc08g008277.1	-3.71565	9.05e-33	0.993962	5.45735e-05
Lnc_000171	-1.65355	7.13e-07	Solyc08g008280.3	-3.71565	9.05e-33	0.993962	5.45735e-05
Lnc_000171	-1.65355	7.13e-07	Solyc08g008600.3	1.0496	0.0001432	-0.993493	6.337e-05
Lnc_000171	-1.65355	7.13e-07	Solyc08g028780.1	-1.08735	3.54e-13	0.994512	4.50925e-05
Lnc_000171	-1.65355	7.13e-07	Solyc08g036660.3	-2.77018	1.93e-67	0.990253	0.000142057
Lnc_000171	-1.65355	7.13e-07	Solyc08g059710.3	-1.27095	3.33e-11	0.995697	2.77288e-05
Lnc_000171	-1.65355	7.13e-07	Solyc08g076390.3	-1.3195	4.69e-14	0.996343	2.00406e-05
Lnc_000171	-1.65355	7.13e-07	Solyc08g077330.3	1.66156	1.5e-08	-0.99726	1.12531e-05
Lnc_000171	-1.65355	7.13e-07	Solyc08g077810.2	-1.44041	1.1e-10	0.990141	0.000145327
Lnc_000171	-1.65355	7.13e-07	Solyc08g078550.1	2.2858	2.41e-21	-0.992193	9.11806e-05
Lnc_000171	-1.65355	7.13e-07	Solyc08g081630.2	-1.01218	2.17e-09	-0.997867	6.81778e-06
Lnc_000171	-1.65355	7.13e-07	Solyc09g005110.3	3.21412	2.43e-56	-0.99818	4.96513e-06
Lnc_000171	-1.65355	7.13e-07	Solyc09g007220.1	1.51421	2.09e-07	-0.998243	4.62599e-06
Lnc_000171	-1.65355	7.13e-07	Solyc09g008913.1	-3.59548	1.21e-41	0.997379	1.0298e-05
Lnc_000171	-1.65355	7.13e-07	Solyc09g008917.1	-3.59548	1.21e-41	0.997379	1.0298e-05
Lnc_000171	-1.65355	7.13e-07	Solyc09g009810.1	-1.31294	1.41e-11	-0.995676	2.8001e-05
Lnc_000171	-1.65355	7.13e-07	Solyc09g010800.4	1.31319	0.000674769	-0.996289	2.06365e-05
Lnc_000171	-1.65355	7.13e-07	Solyc09g064510.3	-1.12181	1.95e-10	0.995484	3.05472e-05
Lnc_000171	-1.65355	7.13e-07	Solyc09g065420.3	1.51188	1.03e-07	-0.99294	7.4588e-05
Lnc_000171	-1.65355	7.13e-07	Solyc09g075210.3	1.26794	0.00314906	-0.990569	0.000132998
Lnc_000171	-1.65355	7.13e-07	Solyc09g075670.1	-1.67155	1.28e-12	0.993744	5.85805e-05
Lnc_000171	-1.65355	7.13e-07	Solyc09g082290.3	2.46242	9.87e-19	-0.996975	1.3716e-05
Lnc_000171	-1.65355	7.13e-07	Solyc09g082460.3	2.76443	3.6e-33	-0.990315	0.000140246
Lnc_000171	-1.65355	7.13e-07	Solyc09g082760.3	-1.21813	2.22e-12	0.990827	0.00012582
Lnc_000171	-1.65355	7.13e-07	Solyc09g083010.3	1.4506	3.55e-07	-0.990101	0.000146509
Lnc_000171	-1.65355	7.13e-07	Solyc09g083020.1	1.4506	3.55e-07	-0.990101	0.000146509
Lnc_000171	-1.65355	7.13e-07	Solyc09g089610.3	3.61154	7.65e-81	-0.990606	0.000131954
Lnc_000171	-1.65355	7.13e-07	Solyc09g090130.3	-1.45875	5.37e-16	0.996136	2.23708e-05
Lnc_000171	-1.65355	7.13e-07	Solyc09g091600.3	1.17641	0.00448313	-0.994239	4.96914e-05
Lnc_000171	-1.65355	7.13e-07	Solyc10g005480.3	3.18102	4.26e-53	0.994027	5.34166e-05
Lnc_000171	-1.65355	7.13e-07	Solyc10g005630.3	-1.0197	2.07e-10	0.99101	0.000120867
Lnc_000171	-1.65355	7.13e-07	Solyc10g005640.3	-1.0197	2.07e-10	0.99101	0.000120867
Lnc_000171	-1.65355	7.13e-07	Solyc10g008700.2	2.94496	2.11e-41	-0.993558	6.2124e-05
Lnc_000171	-1.65355	7.13e-07	Solyc10g009020.3	1.39123	1.6e-11	-0.992067	9.41578e-05
Lnc_000171	-1.65355	7.13e-07	Solyc10g024490.2	1.62988	3.66e-10	-0.993405	6.50887e-05
Lnc_000171	-1.65355	7.13e-07	Solyc10g045420.2	-1.52499	1.37e-15	0.996381	1.96254e-05
Lnc_000171	-1.65355	7.13e-07	Solyc10g050450.2	-1.85262	1.55e-16	0.991611	0.000105266
Lnc_000171	-1.65355	7.13e-07	Solyc10g079690.2	-1.16234	2.84e-06	-0.992569	8.26233e-05
Lnc_000171	-1.65355	7.13e-07	Solyc10g083730.2	-1.03627	5.08e-09	-0.992536	8.33698e-05
Lnc_000171	-1.65355	7.13e-07	Solyc10g083960.2	-1.0795	4.67e-12	-0.993364	6.59142e-05
Lnc_000171	-1.65355	7.13e-07	Solyc10g084023.1	-1.30369	8.82e-12	0.991043	0.00011999
Lnc_000171	-1.65355	7.13e-07	Solyc11g005560.2	1.23664	1.95e-06	-0.991161	0.000116851
Lnc_000171	-1.65355	7.13e-07	Solyc11g006180.2	1.23664	1.95e-06	-0.994086	5.23527e-05
Lnc_000171	-1.65355	7.13e-07	Solyc11g008140.2	-1.35411	1.05e-13	0.991846	9.94678e-05
Lnc_000171	-1.65355	7.13e-07	Solyc11g008530.2	1.39876	2.68e-05	-0.994175	5.08051e-05
Lnc_000171	-1.65355	7.13e-07	Solyc11g008540.2	1.39876	2.68e-05	-0.994175	5.08051e-05
Lnc_000171	-1.65355	7.13e-07	Solyc11g008680.2	3.06809	2.72e-41	-0.992492	8.43373e-05
Lnc_000171	-1.65355	7.13e-07	Solyc11g010250.1	-1.63934	1.94e-14	0.992818	7.71949e-05
Lnc_000171	-1.65355	7.13e-07	Solyc11g018775.1	-1.82278	2.02e-21	0.997223	1.15591e-05
Lnc_000171	-1.65355	7.13e-07	Solyc11g030730.2	-1.8338	4.18e-23	0.99395	5.47854e-05
Lnc_000171	-1.65355	7.13e-07	Solyc11g051060.2	-1.047	0.000122637	0.99241	8.61939e-05
Lnc_000171	-1.65355	7.13e-07	Solyc11g072760.1	-1.64576	1.01e-13	0.994819	4.0191e-05
Lnc_000171	-1.65355	7.13e-07	Solyc12g005340.2	2.70876	6.55e-30	0.991315	0.000112816
Lnc_000171	-1.65355	7.13e-07	Solyc12g005750.1	1.58661	0.00244183	-0.990023	0.000148818
Lnc_000171	-1.65355	7.13e-07	Solyc12g006240.2	3.55761	9.19e-51	-0.996066	2.3184e-05
Lnc_000171	-1.65355	7.13e-07	Solyc12g006520.2	3.87117	7.74e-43	-0.990477	0.000135592
Lnc_000171	-1.65355	7.13e-07	Solyc12g006530.2	3.87117	7.74e-43	-0.990477	0.000135592
Lnc_000171	-1.65355	7.13e-07	Solyc12g006560.2	6.7461	6.15e-122	-0.99838	3.93512e-06
Lnc_000171	-1.65355	7.13e-07	Solyc12g008960.2	-1.40113	1.04e-13	0.996522	1.81235e-05
Lnc_000171	-1.65355	7.13e-07	Solyc12g009680.2	1.08897	0.00718246	-0.993844	5.67258e-05
Lnc_000171	-1.65355	7.13e-07	Solyc12g009850.1	1.48516	0.000136244	-0.99459	4.38297e-05
Lnc_000171	-1.65355	7.13e-07	Solyc12g011370.2	-1.6007	4.56e-16	0.992719	7.93357e-05
Lnc_000171	-1.65355	7.13e-07	Solyc12g013610.2	-1.51588	6.31e-13	0.992547	8.31123e-05
Lnc_000171	-1.65355	7.13e-07	Solyc12g017800.2	1.44585	1.43e-10	-0.992778	7.8038e-05
Lnc_000171	-1.65355	7.13e-07	Solyc12g038650.1	1.49093	1.78e-15	-0.997519	9.22858e-06
Lnc_000171	-1.65355	7.13e-07	Solyc12g042470.2	1.19584	0.000482862	-0.996158	2.21099e-05
Lnc_000171	-1.65355	7.13e-07	Solyc12g057075.1	2.20142	5.86e-12	-0.995732	2.72899e-05
Lnc_000171	-1.65355	7.13e-07	Solyc12g062690.2	-1.66803	2.2e-25	-0.990723	0.000128688
Lnc_000171	-1.65355	7.13e-07	Solyc12g088140.2	2.48377	7.68e-16	-0.994259	4.93376e-05
Lnc_000171	-1.65355	7.13e-07	Solyc12g088260.1	2.79215	2.19e-30	0.991788	0.000100879
Lnc_000171	-1.65355	7.13e-07	Solyc12g088270.2	2.79215	2.19e-30	0.991788	0.000100879
Lnc_000171	-1.65355	7.13e-07	Solyc12g088280.2	2.79215	2.19e-30	0.991788	0.000100879
Lnc_000171	-1.65355	7.13e-07	Solyc12g088390.1	2.79215	2.19e-30	0.994747	4.13199e-05
Lnc_000171	-1.65355	7.13e-07	Solyc12g088400.1	2.79215	2.19e-30	0.994747	4.13199e-05
Lnc_000171	-1.65355	7.13e-07	Solyc12g094520.2	-1.02761	1.1e-10	0.990881	0.000124365
Lnc_000171	-1.65355	7.13e-07	Solyc12g096210.2	-1.3969	5.47e-12	-0.993133	7.05786e-05
Lnc_000171	-1.65355	7.13e-07	Solyc12g096750.2	-1.72059	6.06e-10	-0.990744	0.000128114
Lnc_000171	-1.65355	7.13e-07	Solyc12g099900.1	1.1764	0.0325163	-0.997363	1.0424e-05
Lnc_000201	1.67958	0.000696078	Solyc00g028760.1	1.80441	6.28e-06	0.994191	5.0527e-05
Lnc_000201	1.67958	0.000696078	Solyc01g009810.3	1.04096	0.000226017	0.993586	6.15714e-05
Lnc_000201	1.67958	0.000696078	Solyc01g010350.3	-1.36461	5.48e-13	-0.991903	9.80774e-05
Lnc_000201	1.67958	0.000696078	Solyc01g014270.3	-1.29552	2.02e-14	0.998287	4.39884e-06
Lnc_000201	1.67958	0.000696078	Solyc01g081620.3	-1.08879	2.37e-06	-0.994354	4.773e-05
Lnc_000201	1.67958	0.000696078	Solyc01g090310.2	1.2514	4.54e-06	-0.996803	1.53185e-05
Lnc_000201	1.67958	0.000696078	Solyc01g095770.3	-2.06226	6.71e-20	-0.998899	1.816e-06
Lnc_000201	1.67958	0.000696078	Solyc01g097340.3	1.75038	2.01e-08	-0.993557	6.21433e-05
Lnc_000201	1.67958	0.000696078	Solyc01g097550.3	1.58851	2.33e-10	-0.993303	6.71148e-05
Lnc_000201	1.67958	0.000696078	Solyc01g098500.3	1.58851	2.33e-10	-0.993095	7.13473e-05
Lnc_000201	1.67958	0.000696078	Solyc01g101120.3	-1.20697	3.74e-10	0.997925	6.45483e-06
Lnc_000201	1.67958	0.000696078	Solyc01g104030.3	1.17129	1.81e-06	0.999156	1.0693e-06
Lnc_000201	1.67958	0.000696078	Solyc01g107190.3	1.4693	0.00033078	-0.998271	4.4827e-06
Lnc_000201	1.67958	0.000696078	Solyc01g108320.3	-1.49381	1.54e-21	-0.998565	3.08549e-06
Lnc_000201	1.67958	0.000696078	Solyc01g108860.3	-1.57558	1.48e-11	-0.998478	3.47074e-06
Lnc_000201	1.67958	0.000696078	Solyc02g032030.1	1.7069	1.03e-09	-0.999735	1.04931e-07
Lnc_000201	1.67958	0.000696078	Solyc02g032100.3	-1.27783	2.47e-08	-0.995373	3.20654e-05
Lnc_000201	1.67958	0.000696078	Solyc02g032550.2	-1.27783	2.47e-08	-0.996298	2.05309e-05
Lnc_000201	1.67958	0.000696078	Solyc02g032560.2	-1.27783	2.47e-08	-0.996298	2.05309e-05
Lnc_000201	1.67958	0.000696078	Solyc02g032565.1	-1.27783	2.47e-08	-0.996298	2.05309e-05
Lnc_000201	1.67958	0.000696078	Solyc02g032580.2	-1.27783	2.47e-08	-0.996298	2.05309e-05
Lnc_000201	1.67958	0.000696078	Solyc02g033060.3	3.37157	5.07e-38	0.995799	2.64368e-05
Lnc_000201	1.67958	0.000696078	Solyc02g063350.1	-1.00383	2.66e-07	-0.997309	1.08545e-05
Lnc_000201	1.67958	0.000696078	Solyc02g064970.3	-2.96362	8.71e-32	-0.99563	2.86067e-05
Lnc_000201	1.67958	0.000696078	Solyc02g064980.1	-2.96362	8.71e-32	-0.996547	1.78639e-05
Lnc_000201	1.67958	0.000696078	Solyc02g070040.1	-1.43767	3.2e-12	-0.991052	0.000119736
Lnc_000201	1.67958	0.000696078	Solyc02g070050.3	-1.43767	3.2e-12	-0.991052	0.000119736
Lnc_000201	1.67958	0.000696078	Solyc02g077420.3	3.97473	2.09e-48	-0.996228	2.13197e-05
Lnc_000201	1.67958	0.000696078	Solyc02g077430.3	3.97473	2.09e-48	-0.996228	2.13197e-05
Lnc_000201	1.67958	0.000696078	Solyc02g078570.3	1.03848	0.0296656	-0.999187	9.91272e-07
Lnc_000201	1.67958	0.000696078	Solyc02g080790.3	-2.01596	0.000398827	-0.994796	4.05576e-05
Lnc_000201	1.67958	0.000696078	Solyc02g080830.1	-2.53514	2.11e-29	-0.990084	0.000147002
Lnc_000201	1.67958	0.000696078	Solyc02g080840.1	-2.53514	2.11e-29	-0.990084	0.000147002
Lnc_000201	1.67958	0.000696078	Solyc02g082170.2	-2.26548	7.21e-21	-0.990759	0.00012769
Lnc_000201	1.67958	0.000696078	Solyc02g087920.3	3.59335	9.02e-60	0.992387	8.67248e-05
Lnc_000201	1.67958	0.000696078	Solyc02g089160.3	-1.14732	2.9e-09	0.992614	8.16301e-05
Lnc_000201	1.67958	0.000696078	Solyc02g091360.1	-1.29528	1.74e-08	0.993093	7.13992e-05
Lnc_000201	1.67958	0.000696078	Solyc02g092450.3	-1.023	9.32e-08	-0.996592	1.7403e-05
Lnc_000201	1.67958	0.000696078	Solyc02g092990.1	-1.21091	6.47e-08	-0.996495	1.84045e-05
Lnc_000201	1.67958	0.000696078	Solyc02g094050.3	2.38706	4.24e-37	-0.994031	5.33331e-05
Lnc_000201	1.67958	0.000696078	Solyc02g094110.1	-3.06761	2.03e-31	-0.99716	1.20833e-05
Lnc_000201	1.67958	0.000696078	Solyc03g005450.3	1.31089	3.93e-08	0.998124	5.27847e-06
Lnc_000201	1.67958	0.000696078	Solyc03g005890.1	-1.34707	1.28e-10	0.993515	6.29433e-05
Lnc_000201	1.67958	0.000696078	Solyc03g006700.3	-1.29935	1.61e-10	0.990202	0.000143522
Lnc_000201	1.67958	0.000696078	Solyc03g006810.3	-1.193	2.12e-08	-0.990218	0.000143069
Lnc_000201	1.67958	0.000696078	Solyc03g026270.3	-2.46878	2.68e-24	-0.994848	3.97526e-05
Lnc_000201	1.67958	0.000696078	Solyc03g026280.3	-2.44075	1.93e-24	-0.992567	8.26623e-05
Lnc_000201	1.67958	0.000696078	Solyc03g036470.2	1.19249	0.000374003	-0.999083	1.261e-06
Lnc_000201	1.67958	0.000696078	Solyc03g036473.1	-1.41279	2.89e-11	-0.999083	1.261e-06
Lnc_000201	1.67958	0.000696078	Solyc03g036480.2	-1.41279	2.89e-11	-0.999083	1.261e-06
Lnc_000201	1.67958	0.000696078	Solyc03g080110.3	1.51378	3.1e-07	0.994979	3.77595e-05
Lnc_000201	1.67958	0.000696078	Solyc03g081230.1	-2.58236	3.37e-20	0.991362	0.000111609
Lnc_000201	1.67958	0.000696078	Solyc03g082530.1	-1.66414	9.27e-22	-0.998388	3.89807e-06
Lnc_000201	1.67958	0.000696078	Solyc03g090990.1	-2.16187	4.85e-10	-0.993844	5.67319e-05
Lnc_000201	1.67958	0.000696078	Solyc03g093650.3	-2.72352	4.04e-35	-0.99569	2.78224e-05
Lnc_000201	1.67958	0.000696078	Solyc03g096290.3	-2.83356	9.28e-25	-0.993959	5.46364e-05
Lnc_000201	1.67958	0.000696078	Solyc03g097120.3	2.72613	6.66e-23	0.990244	0.000142295
Lnc_000201	1.67958	0.000696078	Solyc03g097440.3	1.23933	1.22e-06	0.991458	0.000109149
Lnc_000201	1.67958	0.000696078	Solyc03g112700.1	1.19528	0.000188674	-0.991228	0.000115072
Lnc_000201	1.67958	0.000696078	Solyc03g113280.3	-1.75708	6.83e-19	-0.99384	5.67986e-05
Lnc_000201	1.67958	0.000696078	Solyc03g113930.2	1.05644	0.00334383	0.991634	0.000104689
Lnc_000201	1.67958	0.000696078	Solyc03g117270.1	-3.02206	7.7e-42	-0.991217	0.000115371
Lnc_000201	1.67958	0.000696078	Solyc03g117610.1	-3.02206	7.7e-42	-0.995118	3.56859e-05
Lnc_000201	1.67958	0.000696078	Solyc03g118945.1	-1.19566	3.44e-06	-0.99818	4.9675e-06
Lnc_000201	1.67958	0.000696078	Solyc03g118947.1	-1.4076	3.47e-11	-0.99818	4.9675e-06
Lnc_000201	1.67958	0.000696078	Solyc03g118960.2	-1.4076	3.47e-11	-0.99818	4.9675e-06
Lnc_000201	1.67958	0.000696078	Solyc03g118970.3	-1.4076	3.47e-11	-0.99818	4.9675e-06
Lnc_000201	1.67958	0.000696078	Solyc03g119200.3	-2.07675	1.07e-19	-0.996288	2.06422e-05
Lnc_000201	1.67958	0.000696078	Solyc03g121360.1	-2.0482	3.65e-27	-0.991657	0.000104109
Lnc_000201	1.67958	0.000696078	Solyc03g124110.2	-1.01849	1.82e-09	-0.992567	8.26623e-05
Lnc_000201	1.67958	0.000696078	Solyc04g005070.3	-2.41827	6.62e-36	-0.99848	3.46412e-06
Lnc_000201	1.67958	0.000696078	Solyc04g005425.1	1.14761	2.04e-06	0.990711	0.000129031
Lnc_000201	1.67958	0.000696078	Solyc04g007580.1	-2.47461	8.41e-24	-0.998145	5.15756e-06
Lnc_000201	1.67958	0.000696078	Solyc04g014310.1	2.74739	2.92e-28	0.991351	0.000111879
Lnc_000201	1.67958	0.000696078	Solyc04g018110.1	3.29278	9.49e-11	-0.992521	8.36889e-05
Lnc_000201	1.67958	0.000696078	Solyc04g071480.1	-1.21736	2.16e-11	-0.991249	0.000114524
Lnc_000201	1.67958	0.000696078	Solyc04g071600.3	-1.09123	5.86e-08	0.999487	3.9426e-07
Lnc_000201	1.67958	0.000696078	Solyc04g071610.3	-1.09123	5.86e-08	0.999487	3.9426e-07
Lnc_000201	1.67958	0.000696078	Solyc04g072920.3	-1.19847	2.99e-08	-0.999194	9.73678e-07
Lnc_000201	1.67958	0.000696078	Solyc04g076860.3	-1.04208	3.66e-12	0.990054	0.000147882
Lnc_000201	1.67958	0.000696078	Solyc04g077100.3	-1.04208	3.66e-12	0.996072	2.31114e-05
Lnc_000201	1.67958	0.000696078	Solyc04g077110.3	-1.04208	3.66e-12	0.996072	2.31114e-05
Lnc_000201	1.67958	0.000696078	Solyc04g077980.1	-1.20766	5.08e-07	-0.998372	3.97359e-06
Lnc_000201	1.67958	0.000696078	Solyc04g078840.3	1.245	3.41e-10	0.995801	2.64085e-05
Lnc_000201	1.67958	0.000696078	Solyc04g082220.2	-2.10052	4.74e-18	-0.996388	1.95456e-05
Lnc_000201	1.67958	0.000696078	Solyc05g005540.3	1.22204	0.000190331	-0.999129	1.13835e-06
Lnc_000201	1.67958	0.000696078	Solyc05g011940.3	1.74298	0.000460738	-0.990762	0.000127613
Lnc_000201	1.67958	0.000696078	Solyc05g013370.1	-1.86129	1.44e-14	-0.99169	0.000103307
Lnc_000201	1.67958	0.000696078	Solyc05g048820.3	-1.19483	2.1e-09	-0.994006	5.37857e-05
Lnc_000201	1.67958	0.000696078	Solyc05g051400.3	1.54884	4.46e-10	-0.991179	0.000116367
Lnc_000201	1.67958	0.000696078	Solyc05g051820.3	1.54884	4.46e-10	-0.991967	9.65343e-05
Lnc_000201	1.67958	0.000696078	Solyc05g052860.3	1.33218	1e-05	0.993884	5.59942e-05
Lnc_000201	1.67958	0.000696078	Solyc05g052870.3	1.33218	1e-05	0.993884	5.59942e-05
Lnc_000201	1.67958	0.000696078	Solyc05g053010.1	1.70859	1.61e-10	-0.998405	3.81505e-06
Lnc_000201	1.67958	0.000696078	Solyc05g053520.3	1.70859	1.61e-10	-0.992862	7.62479e-05
Lnc_000201	1.67958	0.000696078	Solyc05g053965.1	1.4207	1.86e-05	-0.997084	1.27458e-05
Lnc_000201	1.67958	0.000696078	Solyc05g055680.3	-2.31349	4.26e-13	-0.997442	9.80529e-06
Lnc_000201	1.67958	0.000696078	Solyc06g006000.3	-1.32737	3.61e-05	0.998652	2.72449e-06
Lnc_000201	1.67958	0.000696078	Solyc06g008030.3	-1.19004	4.64e-09	0.990248	0.000142189
Lnc_000201	1.67958	0.000696078	Solyc06g008620.1	-1.19004	4.64e-09	0.992713	7.94663e-05
Lnc_000201	1.67958	0.000696078	Solyc06g011350.3	-2.7826	9.59e-27	-0.997884	6.7118e-06
Lnc_000201	1.67958	0.000696078	Solyc06g050760.1	2.08139	8.12e-15	-0.990547	0.000133613
Lnc_000201	1.67958	0.000696078	Solyc06g053950.2	-1.22521	7.46e-10	0.997052	1.30275e-05
Lnc_000201	1.67958	0.000696078	Solyc06g053960.3	-1.22521	7.46e-10	0.997052	1.30275e-05
Lnc_000201	1.67958	0.000696078	Solyc06g054130.1	-1.01634	7.81e-08	-0.991861	9.91015e-05
Lnc_000201	1.67958	0.000696078	Solyc06g060760.3	-2.79925	3.83e-25	-0.998876	1.89323e-06
Lnc_000201	1.67958	0.000696078	Solyc06g062380.3	-1.19673	2.43e-12	-0.990186	0.000144006
Lnc_000201	1.67958	0.000696078	Solyc06g067870.3	-3.37155	5.67e-23	-0.995351	3.23763e-05
Lnc_000201	1.67958	0.000696078	Solyc06g069400.3	-1.69649	1.04e-13	-0.995252	3.37616e-05
Lnc_000201	1.67958	0.000696078	Solyc06g072240.1	3.9949	2.11e-73	-0.99056	0.000133259
Lnc_000201	1.67958	0.000696078	Solyc06g073220.1	-1.67171	7.9e-10	-0.990501	0.000134911
Lnc_000201	1.67958	0.000696078	Solyc06g074030.1	-1.76982	2.92e-17	-0.990454	0.000136243
Lnc_000201	1.67958	0.000696078	Solyc06g074420.1	-2.32417	2.36e-19	-0.996498	1.83707e-05
Lnc_000201	1.67958	0.000696078	Solyc06g075220.1	1.13995	0.00181303	-0.997276	1.11174e-05
Lnc_000201	1.67958	0.000696078	Solyc06g075650.3	-1.48651	1.6e-14	-0.992794	7.77097e-05
Lnc_000201	1.67958	0.000696078	Solyc06g076470.3	-3.03056	4.53e-62	-0.995996	2.40166e-05
Lnc_000201	1.67958	0.000696078	Solyc06g083160.1	-2.27039	1.47e-23	-0.996796	1.53828e-05
Lnc_000201	1.67958	0.000696078	Solyc06g083910.3	-2.35825	1.69e-20	-0.993919	5.53609e-05
Lnc_000201	1.67958	0.000696078	Solyc06g084430.3	-2.35825	1.69e-20	-0.994913	3.87565e-05
Lnc_000201	1.67958	0.000696078	Solyc07g006230.1	1.08513	0.000131933	-0.992369	8.71368e-05
Lnc_000201	1.67958	0.000696078	Solyc07g006740.3	2.1468	2.56e-14	-0.998318	4.243e-06
Lnc_000201	1.67958	0.000696078	Solyc07g007180.3	1.37795	2.44e-07	0.994052	5.29614e-05
Lnc_000201	1.67958	0.000696078	Solyc07g014680.3	1.16258	0.00034851	-0.997704	7.90479e-06
Lnc_000201	1.67958	0.000696078	Solyc07g052310.1	-1.86121	5.93e-10	-0.994628	4.32152e-05
Lnc_000201	1.67958	0.000696078	Solyc07g052670.3	-1.21778	5.66e-08	-0.990544	0.000133704
Lnc_000201	1.67958	0.000696078	Solyc07g054080.2	-1.69366	8.09e-14	0.992779	7.80185e-05
Lnc_000201	1.67958	0.000696078	Solyc07g056320.3	1.56497	1.04e-10	0.992744	7.87805e-05
Lnc_000201	1.67958	0.000696078	Solyc07g064820.1	-1.57099	6.92e-15	-0.991121	0.00011791
Lnc_000201	1.67958	0.000696078	Solyc08g007080.3	-1.17495	8.11e-11	-0.993358	6.60358e-05
Lnc_000201	1.67958	0.000696078	Solyc08g007830.1	-1.33289	1.19e-08	-0.998649	2.73744e-06
Lnc_000201	1.67958	0.000696078	Solyc08g007840.2	-1.33289	1.19e-08	-0.995471	3.07214e-05
Lnc_000201	1.67958	0.000696078	Solyc08g008050.3	-3.71565	9.05e-33	-0.999211	9.32415e-07
Lnc_000201	1.67958	0.000696078	Solyc08g014000.3	-1.53147	2.62e-11	-0.998676	2.62742e-06
Lnc_000201	1.67958	0.000696078	Solyc08g016400.1	1.04648	9.47e-06	0.991264	0.000114153
Lnc_000201	1.67958	0.000696078	Solyc08g061010.3	-1.27761	5.93e-13	0.99267	8.04024e-05
Lnc_000201	1.67958	0.000696078	Solyc08g066590.3	-1.39383	1.05e-11	-0.991696	0.000103144
Lnc_000201	1.67958	0.000696078	Solyc08g066880.3	1.90974	2.91e-10	-0.99473	4.15792e-05
Lnc_000201	1.67958	0.000696078	Solyc08g068630.3	-1.5875	1.7e-12	-0.998547	3.16326e-06
Lnc_000201	1.67958	0.000696078	Solyc08g074682.1	-1.00027	1.25e-08	-0.993902	5.56596e-05
Lnc_000201	1.67958	0.000696078	Solyc08g074683.1	-1.00027	1.25e-08	-0.993902	5.56596e-05
Lnc_000201	1.67958	0.000696078	Solyc08g075020.3	1.46551	1.17e-10	0.993323	6.67277e-05
Lnc_000201	1.67958	0.000696078	Solyc08g077300.3	1.66156	1.5e-08	0.990973	0.000121856
Lnc_000201	1.67958	0.000696078	Solyc08g078190.1	-1.22323	2.43e-09	-0.997073	1.28422e-05
Lnc_000201	1.67958	0.000696078	Solyc08g081190.3	-1.10504	3.33e-10	-0.998392	3.87627e-06
Lnc_000201	1.67958	0.000696078	Solyc08g081195.1	-1.10504	3.33e-10	-0.998392	3.87627e-06
Lnc_000201	1.67958	0.000696078	Solyc08g081200.3	-1.10504	3.33e-10	-0.998392	3.87627e-06
Lnc_000201	1.67958	0.000696078	Solyc09g005410.2	1.32542	0.00362247	-0.991789	0.000100853
Lnc_000201	1.67958	0.000696078	Solyc09g005420.3	1.32542	0.00362247	-0.991789	0.000100853
Lnc_000201	1.67958	0.000696078	Solyc09g007760.3	-1.43488	1.17e-12	-0.997014	1.33586e-05
Lnc_000201	1.67958	0.000696078	Solyc09g008910.2	-3.59548	1.21e-41	-0.995386	3.189e-05
Lnc_000201	1.67958	0.000696078	Solyc09g011960.2	-1.3747	2.79e-11	-0.993938	5.50139e-05
Lnc_000201	1.67958	0.000696078	Solyc09g074890.1	-1.35355	2.28e-11	-0.996564	1.76926e-05
Lnc_000201	1.67958	0.000696078	Solyc09g075440.3	2.74658	2.97e-22	0.991508	0.000107857
Lnc_000201	1.67958	0.000696078	Solyc09g075445.1	2.74658	2.97e-22	0.991508	0.000107857
Lnc_000201	1.67958	0.000696078	Solyc09g082810.3	1.4506	3.55e-07	0.991765	0.00010145
Lnc_000201	1.67958	0.000696078	Solyc09g091270.2	-1.11468	3.12e-10	0.99267	8.0397e-05
Lnc_000201	1.67958	0.000696078	Solyc10g050890.2	-2.111	5.76e-19	-0.996414	1.92654e-05
Lnc_000201	1.67958	0.000696078	Solyc10g055760.2	-1.01811	1.97e-09	-0.992704	7.96464e-05
Lnc_000201	1.67958	0.000696078	Solyc10g074740.1	-1.78192	9.56e-16	-0.99846	3.55329e-06
Lnc_000201	1.67958	0.000696078	Solyc10g074830.1	-3.19803	9.81e-07	-0.998962	1.61416e-06
Lnc_000201	1.67958	0.000696078	Solyc10g075100.2	1.96836	5.32e-11	0.999317	7.00424e-07
Lnc_000201	1.67958	0.000696078	Solyc10g078550.3	-1.46818	5.34e-12	-0.991668	0.000103841
Lnc_000201	1.67958	0.000696078	Solyc10g081520.1	-1.01846	6.79e-08	0.991215	0.000115437
Lnc_000201	1.67958	0.000696078	Solyc10g084120.2	-3.26023	4.27e-35	-0.998931	1.71215e-06
Lnc_000201	1.67958	0.000696078	Solyc10g085140.1	1.13149	4.86e-06	0.994675	4.24644e-05
Lnc_000201	1.67958	0.000696078	Solyc11g007730.2	-1.45377	1.19e-12	-0.998955	1.63606e-06
Lnc_000201	1.67958	0.000696078	Solyc11g008020.2	1.09131	2.44e-05	0.995347	3.24189e-05
Lnc_000201	1.67958	0.000696078	Solyc11g008030.2	1.09131	2.44e-05	0.995347	3.24189e-05
Lnc_000201	1.67958	0.000696078	Solyc11g012320.2	-2.17984	3.61e-22	-0.992964	7.408e-05
Lnc_000201	1.67958	0.000696078	Solyc11g020230.1	-2.78955	1.06e-32	-0.991007	0.000120942
Lnc_000201	1.67958	0.000696078	Solyc11g021060.2	-2.78955	1.06e-32	-0.990392	0.000138026
Lnc_000201	1.67958	0.000696078	Solyc11g042580.1	-1.047	0.000122637	-0.995607	2.8911e-05
Lnc_000201	1.67958	0.000696078	Solyc11g056650.2	1.70597	4.46e-14	0.996984	1.36315e-05
Lnc_000201	1.67958	0.000696078	Solyc11g068950.2	1.11374	1.24e-05	0.999115	1.17524e-06
Lnc_000201	1.67958	0.000696078	Solyc11g071550.2	-1.46906	5.24e-13	-0.991042	0.000120022
Lnc_000201	1.67958	0.000696078	Solyc12g005790.2	1.58661	0.00244183	-0.996992	1.35546e-05
Lnc_000201	1.67958	0.000696078	Solyc12g005810.1	1.58661	0.00244183	-0.992966	7.40471e-05
Lnc_000201	1.67958	0.000696078	Solyc12g014620.2	1.57397	2.88e-10	-0.992586	8.22379e-05
Lnc_000201	1.67958	0.000696078	Solyc12g014630.1	1.57397	2.88e-10	-0.992586	8.22379e-05
Lnc_000201	1.67958	0.000696078	Solyc12g027540.2	1.59516	3.56e-11	0.992123	9.28197e-05
Lnc_000201	1.67958	0.000696078	Solyc12g044420.1	-2.3422	3.69e-42	0.991614	0.0001052
Lnc_000201	1.67958	0.000696078	Solyc12g049360.2	-1.36823	4.8e-11	-0.991117	0.000118013
Lnc_000201	1.67958	0.000696078	Solyc12g088360.2	2.79215	2.19e-30	-0.995446	3.10552e-05
Lnc_000201	1.67958	0.000696078	Solyc12g088760.1	2.79215	2.19e-30	-0.993873	5.62022e-05
Lnc_000201	1.67958	0.000696078	Solyc12g096770.1	-1.72059	6.06e-10	-0.998968	1.59642e-06
Lnc_000201	1.67958	0.000696078	Solyc12g096780.2	-1.72059	6.06e-10	-0.99704	1.31294e-05
Lnc_000201	1.67958	0.000696078	Solyc12g098615.1	1.23501	0.00447331	0.990244	0.000142293
Lnc_000204	1.14372	0.000244255	Solyc01g005140.3	-1.65287	1.28e-09	0.990986	0.000121501
Lnc_000204	1.14372	0.000244255	Solyc01g008130.3	-1.90874	2.86e-11	0.992073	9.40162e-05
Lnc_000204	1.14372	0.000244255	Solyc01g008670.3	1.07493	9.47e-05	0.998835	2.03446e-06
Lnc_000204	1.14372	0.000244255	Solyc01g009860.3	1.18025	1.9e-05	0.998824	2.07215e-06
Lnc_000204	1.14372	0.000244255	Solyc01g058250.2	-1.8582	6.36e-26	0.993719	5.90494e-05
Lnc_000204	1.14372	0.000244255	Solyc01g067750.3	-1.52326	6.48e-07	0.990363	0.000138847
Lnc_000204	1.14372	0.000244255	Solyc01g080020.2	1.03355	0.0013518	0.993504	6.31607e-05
Lnc_000204	1.14372	0.000244255	Solyc01g081060.3	-1.08879	2.37e-06	0.991877	9.87118e-05
Lnc_000204	1.14372	0.000244255	Solyc01g081620.3	-1.08879	2.37e-06	-0.992352	8.7515e-05
Lnc_000204	1.14372	0.000244255	Solyc01g090560.3	1.26255	3.48e-05	-0.991604	0.000105443
Lnc_000204	1.14372	0.000244255	Solyc01g091030.3	1.26255	3.48e-05	0.996872	1.46622e-05
Lnc_000204	1.14372	0.000244255	Solyc01g094340.3	1.37546	2.82e-10	0.991541	0.000107028
Lnc_000204	1.14372	0.000244255	Solyc01g094690.3	1.37546	2.82e-10	-0.998542	3.18572e-06
Lnc_000204	1.14372	0.000244255	Solyc01g095305.1	-1.25542	5.28e-16	0.99908	1.26883e-06
Lnc_000204	1.14372	0.000244255	Solyc01g095320.3	-1.25542	5.28e-16	0.99908	1.26883e-06
Lnc_000204	1.14372	0.000244255	Solyc01g097340.3	1.75038	2.01e-08	-0.993424	6.47161e-05
Lnc_000204	1.14372	0.000244255	Solyc01g097470.3	1.58851	2.33e-10	0.993618	6.09679e-05
Lnc_000204	1.14372	0.000244255	Solyc01g097550.3	1.58851	2.33e-10	-0.996671	1.66051e-05
Lnc_000204	1.14372	0.000244255	Solyc01g098190.3	1.58851	2.33e-10	0.995821	2.61627e-05
Lnc_000204	1.14372	0.000244255	Solyc01g098500.3	1.58851	2.33e-10	-0.996898	1.442e-05
Lnc_000204	1.14372	0.000244255	Solyc01g099405.1	-1.73234	4.66e-10	-0.992559	8.28536e-05
Lnc_000204	1.14372	0.000244255	Solyc01g099410.3	-1.73234	4.66e-10	-0.992559	8.28536e-05
Lnc_000204	1.14372	0.000244255	Solyc01g105420.3	1.06769	0.000750053	0.994294	4.87391e-05
Lnc_000204	1.14372	0.000244255	Solyc01g108860.3	-1.57558	1.48e-11	-0.991154	0.000117034
Lnc_000204	1.14372	0.000244255	Solyc01g111340.3	-1.12629	8.33e-08	-0.993239	6.84055e-05
Lnc_000204	1.14372	0.000244255	Solyc01g111350.3	-1.12629	8.33e-08	-0.993239	6.84055e-05
Lnc_000204	1.14372	0.000244255	Solyc02g032550.2	-1.27783	2.47e-08	-0.99032	0.000140106
Lnc_000204	1.14372	0.000244255	Solyc02g032560.2	-1.27783	2.47e-08	-0.99032	0.000140106
Lnc_000204	1.14372	0.000244255	Solyc02g032565.1	-1.27783	2.47e-08	-0.99032	0.000140106
Lnc_000204	1.14372	0.000244255	Solyc02g032580.2	-1.27783	2.47e-08	-0.99032	0.000140106
Lnc_000204	1.14372	0.000244255	Solyc02g071870.3	-1.49494	5.05e-18	0.995549	2.96793e-05
Lnc_000204	1.14372	0.000244255	Solyc02g071875.1	-1.49494	5.05e-18	0.995549	2.96793e-05
Lnc_000204	1.14372	0.000244255	Solyc02g072180.3	-1.01469	2.59e-06	-0.991057	0.0001196
Lnc_000204	1.14372	0.000244255	Solyc02g077420.3	3.97473	2.09e-48	-0.990368	0.000138713
Lnc_000204	1.14372	0.000244255	Solyc02g077430.3	3.97473	2.09e-48	-0.990368	0.000138713
Lnc_000204	1.14372	0.000244255	Solyc02g077480.1	3.97473	2.09e-48	-0.999111	1.18571e-06
Lnc_000204	1.14372	0.000244255	Solyc02g077490.3	-1.6406	9.12e-09	-0.999111	1.18571e-06
Lnc_000204	1.14372	0.000244255	Solyc02g077510.3	-1.6406	9.12e-09	-0.999111	1.18571e-06
Lnc_000204	1.14372	0.000244255	Solyc02g077520.3	-1.6406	9.12e-09	-0.999111	1.18571e-06
Lnc_000204	1.14372	0.000244255	Solyc02g077525.1	-1.6406	9.12e-09	-0.999111	1.18571e-06
Lnc_000204	1.14372	0.000244255	Solyc02g077530.2	-1.6406	9.12e-09	-0.999111	1.18571e-06
Lnc_000204	1.14372	0.000244255	Solyc02g080790.3	-2.01596	0.000398827	-0.996283	2.0695e-05
Lnc_000204	1.14372	0.000244255	Solyc02g082170.2	-2.26548	7.21e-21	-0.998012	5.92386e-06
Lnc_000204	1.14372	0.000244255	Solyc02g082700.3	-1.44394	2.79e-15	-0.993756	5.83624e-05
Lnc_000204	1.14372	0.000244255	Solyc02g083760.3	-2.46881	5.11e-23	-0.991074	0.000119167
Lnc_000204	1.14372	0.000244255	Solyc02g086670.3	1.35279	1.29e-07	0.995159	3.50994e-05
Lnc_000204	1.14372	0.000244255	Solyc02g089160.3	-1.14732	2.9e-09	0.996541	1.79286e-05
Lnc_000204	1.14372	0.000244255	Solyc02g091430.3	1.09942	0.000184196	0.99209	9.36058e-05
Lnc_000204	1.14372	0.000244255	Solyc02g094050.3	2.38706	4.24e-37	-0.991503	0.000108
Lnc_000204	1.14372	0.000244255	Solyc03g005210.3	1.49297	1.49e-08	0.99913	1.13563e-06
Lnc_000204	1.14372	0.000244255	Solyc03g005227.1	1.49297	1.49e-08	-0.995159	3.50976e-05
Lnc_000204	1.14372	0.000244255	Solyc03g005520.1	1.89014	6.81e-08	0.99219	9.12473e-05
Lnc_000204	1.14372	0.000244255	Solyc03g005840.2	-1.34707	1.28e-10	0.99724	1.14141e-05
Lnc_000204	1.14372	0.000244255	Solyc03g006810.3	-1.193	2.12e-08	-0.99651	1.82517e-05
Lnc_000204	1.14372	0.000244255	Solyc03g031860.3	1.09198	3.45e-06	0.990556	0.000133353
Lnc_000204	1.14372	0.000244255	Solyc03g044460.1	1.28937	7.9e-06	0.992092	9.35482e-05
Lnc_000204	1.14372	0.000244255	Solyc03g080110.3	1.51378	3.1e-07	0.99074	0.000128213
Lnc_000204	1.14372	0.000244255	Solyc03g080120.1	1.02527	0.000655514	0.993995	5.39852e-05
Lnc_000204	1.14372	0.000244255	Solyc03g082560.3	1.05248	0.000213703	0.992453	8.52112e-05
Lnc_000204	1.14372	0.000244255	Solyc03g090990.1	-2.16187	4.85e-10	-0.995872	2.55303e-05
Lnc_000204	1.14372	0.000244255	Solyc03g093650.3	-2.72352	4.04e-35	-0.993117	7.08979e-05
Lnc_000204	1.14372	0.000244255	Solyc03g097420.3	-1.20701	1.22e-05	-0.994897	3.89941e-05
Lnc_000204	1.14372	0.000244255	Solyc03g111310.3	1.02557	0.00200872	0.993572	6.18444e-05
Lnc_000204	1.14372	0.000244255	Solyc03g115920.3	1.12607	0.0181575	0.99008	0.000147119
Lnc_000204	1.14372	0.000244255	Solyc03g116100.3	-1.44615	6.63e-16	0.990639	0.00013103
Lnc_000204	1.14372	0.000244255	Solyc03g117630.1	-3.02206	7.7e-42	0.99467	4.25357e-05
Lnc_000204	1.14372	0.000244255	Solyc03g122310.3	1.04878	0.00068934	0.996115	2.26158e-05
Lnc_000204	1.14372	0.000244255	Solyc04g005810.3	-1.5641	9.26e-08	-0.997956	6.26535e-06
Lnc_000204	1.14372	0.000244255	Solyc04g007170.3	1.155	8.45e-06	0.997864	6.83863e-06
Lnc_000204	1.14372	0.000244255	Solyc04g007795.1	-1.01406	1.67e-06	-0.995106	3.58742e-05
Lnc_000204	1.14372	0.000244255	Solyc04g009465.1	1.30587	2.46e-06	0.992716	7.93834e-05
Lnc_000204	1.14372	0.000244255	Solyc04g009470.3	1.30587	2.46e-06	0.992716	7.93834e-05
Lnc_000204	1.14372	0.000244255	Solyc04g009590.3	-1.69738	0.0121646	-0.992432	8.56849e-05
Lnc_000204	1.14372	0.000244255	Solyc04g011390.1	-1.14139	5.56e-13	-0.997267	1.11916e-05
Lnc_000204	1.14372	0.000244255	Solyc04g014770.1	3.37794	3.51e-58	-0.99253	8.35032e-05
Lnc_000204	1.14372	0.000244255	Solyc04g018110.1	3.29278	9.49e-11	-0.993889	5.59113e-05
Lnc_000204	1.14372	0.000244255	Solyc04g025880.3	1.00379	0.00186317	0.991101	0.000118427
Lnc_000204	1.14372	0.000244255	Solyc04g064550.1	-1.18489	5.58e-09	0.992371	8.70812e-05
Lnc_000204	1.14372	0.000244255	Solyc04g076860.3	-1.04208	3.66e-12	0.99221	9.07881e-05
Lnc_000204	1.14372	0.000244255	Solyc04g077100.3	-1.04208	3.66e-12	0.994089	5.23138e-05
Lnc_000204	1.14372	0.000244255	Solyc04g077110.3	-1.04208	3.66e-12	0.994089	5.23138e-05
Lnc_000204	1.14372	0.000244255	Solyc04g078800.3	-1.14505	7.84e-07	-0.992181	9.14583e-05
Lnc_000204	1.14372	0.000244255	Solyc04g080300.3	1.05899	0.00120108	0.991749	0.000101846
Lnc_000204	1.14372	0.000244255	Solyc04g082420.3	1.2273	1.37e-05	0.993725	5.89335e-05
Lnc_000204	1.14372	0.000244255	Solyc04g082830.3	-1.48235	1.68e-09	0.999419	5.06785e-07
Lnc_000204	1.14372	0.000244255	Solyc05g007060.3	-1.29709	1.99e-11	0.993795	5.76377e-05
Lnc_000204	1.14372	0.000244255	Solyc05g007580.1	-1.56198	4.46e-09	0.993459	6.4043e-05
Lnc_000204	1.14372	0.000244255	Solyc05g007770.3	1.68573	2.13e-12	0.998213	4.78591e-06
Lnc_000204	1.14372	0.000244255	Solyc05g007900.2	1.68573	2.13e-12	0.992805	7.74732e-05
Lnc_000204	1.14372	0.000244255	Solyc05g013650.2	2.02761	6.31e-36	-0.996469	1.8683e-05
Lnc_000204	1.14372	0.000244255	Solyc05g014370.3	4.21093	8.96e-37	-0.990192	0.000143827
Lnc_000204	1.14372	0.000244255	Solyc05g015610.3	1.02362	0.00183801	0.991247	0.000114578
Lnc_000204	1.14372	0.000244255	Solyc05g015613.1	1.02362	0.00183801	0.991247	0.000114578
Lnc_000204	1.14372	0.000244255	Solyc05g041540.3	1.48677	2.6e-09	0.992813	7.72951e-05
Lnc_000204	1.14372	0.000244255	Solyc05g051215.1	1.78999	4.09e-12	0.992298	8.87509e-05
Lnc_000204	1.14372	0.000244255	Solyc05g053760.3	1.4207	1.86e-05	0.994772	4.09239e-05
Lnc_000204	1.14372	0.000244255	Solyc05g053965.1	1.4207	1.86e-05	-0.990012	0.000149133
Lnc_000204	1.14372	0.000244255	Solyc05g054360.3	1.19736	9.4e-06	0.990894	0.000123995
Lnc_000204	1.14372	0.000244255	Solyc05g054610.1	-1.46718	8.35e-09	-0.998611	2.89142e-06
Lnc_000204	1.14372	0.000244255	Solyc05g055550.3	1.1797	9.32e-06	0.99757	8.84772e-06
Lnc_000204	1.14372	0.000244255	Solyc05g055680.3	-2.31349	4.26e-13	-0.993535	6.2553e-05
Lnc_000204	1.14372	0.000244255	Solyc06g005420.1	-1.09251	0.000374978	-0.990371	0.000138638
Lnc_000204	1.14372	0.000244255	Solyc06g005430.1	-1.09251	0.000374978	-0.990371	0.000138638
Lnc_000204	1.14372	0.000244255	Solyc06g005620.3	-1.32737	3.61e-05	-0.994144	5.13305e-05
Lnc_000204	1.14372	0.000244255	Solyc06g033850.3	1.40456	1.5e-07	0.997954	6.27484e-06
Lnc_000204	1.14372	0.000244255	Solyc06g053840.3	1.35676	3.55e-07	0.993438	6.44513e-05
Lnc_000204	1.14372	0.000244255	Solyc06g054540.3	-1.1815	1.12e-06	0.991769	0.000101339
Lnc_000204	1.14372	0.000244255	Solyc06g059860.3	1.52537	1.42e-09	0.992399	8.64439e-05
Lnc_000204	1.14372	0.000244255	Solyc06g067870.3	-3.37155	5.67e-23	-0.994433	4.63966e-05
Lnc_000204	1.14372	0.000244255	Solyc06g069760.3	-1.69649	1.04e-13	0.993105	7.11564e-05
Lnc_000204	1.14372	0.000244255	Solyc06g072240.1	3.9949	2.11e-73	-0.992569	8.2628e-05
Lnc_000204	1.14372	0.000244255	Solyc06g073220.1	-1.67171	7.9e-10	-0.997367	1.039e-05
Lnc_000204	1.14372	0.000244255	Solyc06g074790.1	-1.87258	6.75e-10	-0.99269	7.99529e-05
Lnc_000204	1.14372	0.000244255	Solyc06g075800.1	-1.48651	1.6e-14	-0.99902	1.44e-06
Lnc_000204	1.14372	0.000244255	Solyc06g084430.3	-2.35825	1.69e-20	-0.995704	2.7649e-05
Lnc_000204	1.14372	0.000244255	Solyc07g006120.3	1.08513	0.000131933	0.997795	7.28468e-06
Lnc_000204	1.14372	0.000244255	Solyc07g006130.2	1.08513	0.000131933	0.997795	7.28468e-06
Lnc_000204	1.14372	0.000244255	Solyc07g006800.1	2.1468	2.56e-14	0.996237	2.12191e-05
Lnc_000204	1.14372	0.000244255	Solyc07g007930.3	4.25527	1.38e-63	0.996399	1.94268e-05
Lnc_000204	1.14372	0.000244255	Solyc07g009440.2	1.16258	0.00034851	0.99378	5.79164e-05
Lnc_000204	1.14372	0.000244255	Solyc07g014680.3	1.16258	0.00034851	-0.992697	7.9806e-05
Lnc_000204	1.14372	0.000244255	Solyc07g017510.3	-1.48793	7.27e-14	0.999208	9.40674e-07
Lnc_000204	1.14372	0.000244255	Solyc07g021625.1	2.20933	3.43e-23	0.990088	0.000146891
Lnc_000204	1.14372	0.000244255	Solyc07g021630.3	2.20933	3.43e-23	0.990088	0.000146891
Lnc_000204	1.14372	0.000244255	Solyc07g021640.2	2.20933	3.43e-23	0.995003	3.73922e-05
Lnc_000204	1.14372	0.000244255	Solyc07g021650.2	2.20933	3.43e-23	0.995003	3.73922e-05
Lnc_000204	1.14372	0.000244255	Solyc07g026675.1	1.22471	4.55e-06	0.992522	8.36704e-05
Lnc_000204	1.14372	0.000244255	Solyc07g026680.2	1.22471	4.55e-06	0.992522	8.36704e-05
Lnc_000204	1.14372	0.000244255	Solyc07g041830.3	-2.34911	1.09e-19	0.992323	8.81734e-05
Lnc_000204	1.14372	0.000244255	Solyc07g052670.3	-1.21778	5.66e-08	-0.994485	4.55334e-05
Lnc_000204	1.14372	0.000244255	Solyc07g053480.3	-1.12411	0.00229492	-0.991918	9.77233e-05
Lnc_000204	1.14372	0.000244255	Solyc07g053490.3	1.11052	7.26e-05	0.997929	6.42976e-06
Lnc_000204	1.14372	0.000244255	Solyc07g053495.1	1.11052	7.26e-05	0.997929	6.42976e-06
Lnc_000204	1.14372	0.000244255	Solyc07g053520.2	1.11052	7.26e-05	0.997929	6.42976e-06
Lnc_000204	1.14372	0.000244255	Solyc07g053525.1	1.11052	7.26e-05	0.997929	6.42976e-06
Lnc_000204	1.14372	0.000244255	Solyc07g054080.2	-1.69366	8.09e-14	0.995775	2.67341e-05
Lnc_000204	1.14372	0.000244255	Solyc07g056340.3	1.23501	1.58e-05	0.991707	0.000102881
Lnc_000204	1.14372	0.000244255	Solyc07g056420.4	2.66083	3.65e-35	0.996627	1.70426e-05
Lnc_000204	1.14372	0.000244255	Solyc07g061730.3	5.30199	2.95e-98	0.991504	0.000107965
Lnc_000204	1.14372	0.000244255	Solyc07g063930.3	1.22485	2.28e-05	0.992713	7.94584e-05
Lnc_000204	1.14372	0.000244255	Solyc08g061490.3	1.0915	6.26e-05	0.990555	0.00013338
Lnc_000204	1.14372	0.000244255	Solyc08g067410.2	1.0924	0.000254125	0.996081	2.30108e-05
Lnc_000204	1.14372	0.000244255	Solyc08g068150.3	1.65348	9.16e-06	0.997652	8.26624e-06
Lnc_000204	1.14372	0.000244255	Solyc08g075020.3	1.46551	1.17e-10	0.993606	6.11987e-05
Lnc_000204	1.14372	0.000244255	Solyc08g075280.3	1.42917	8.11e-08	0.994312	4.84325e-05
Lnc_000204	1.14372	0.000244255	Solyc08g077230.3	1.66156	1.5e-08	0.995766	2.68507e-05
Lnc_000204	1.14372	0.000244255	Solyc08g078190.1	-1.22323	2.43e-09	-0.991256	0.000114343
Lnc_000204	1.14372	0.000244255	Solyc08g078310.3	1.1535	1.57e-05	0.990028	0.000148653
Lnc_000204	1.14372	0.000244255	Solyc08g080640.2	2.4237	1.86e-19	0.993155	7.01167e-05
Lnc_000204	1.14372	0.000244255	Solyc08g080650.3	2.4237	1.86e-19	0.993155	7.01167e-05
Lnc_000204	1.14372	0.000244255	Solyc08g080890.3	-1.33559	4.12e-10	-0.994332	4.80921e-05
Lnc_000204	1.14372	0.000244255	Solyc09g005610.3	-1.10761	4.27e-08	0.991084	0.000118893
Lnc_000204	1.14372	0.000244255	Solyc09g008820.3	-1.07984	5.32e-07	0.998425	3.72047e-06
Lnc_000204	1.14372	0.000244255	Solyc09g009985.1	1.06369	2.14e-07	0.994767	4.10033e-05
Lnc_000204	1.14372	0.000244255	Solyc09g010000.3	1.06369	2.14e-07	0.994767	4.10033e-05
Lnc_000204	1.14372	0.000244255	Solyc09g010010.1	1.06369	2.14e-07	0.994767	4.10033e-05
Lnc_000204	1.14372	0.000244255	Solyc09g011630.3	1.13215	7.9e-05	0.99519	3.4649e-05
Lnc_000204	1.14372	0.000244255	Solyc09g014870.1	-1.05727	3.68e-05	-0.993373	6.5729e-05
Lnc_000204	1.14372	0.000244255	Solyc09g061280.3	-1.47744	9.24e-10	0.998555	3.12929e-06
Lnc_000204	1.14372	0.000244255	Solyc09g063130.3	1.38434	1.38e-10	0.99635	1.99639e-05
Lnc_000204	1.14372	0.000244255	Solyc09g065390.1	1.51188	1.03e-07	0.99823	4.69654e-06
Lnc_000204	1.14372	0.000244255	Solyc09g074300.1	-1.73545	0.000611683	-0.99938	5.76146e-07
Lnc_000204	1.14372	0.000244255	Solyc09g075610.3	-1.67155	1.28e-12	0.997102	1.25875e-05
Lnc_000204	1.14372	0.000244255	Solyc09g082110.3	-1.15081	9.9e-13	0.993767	5.81458e-05
Lnc_000204	1.14372	0.000244255	Solyc09g082120.3	-1.15081	9.9e-13	0.993767	5.81458e-05
Lnc_000204	1.14372	0.000244255	Solyc09g090430.3	-1.0371	2.78e-08	0.993108	7.10767e-05
Lnc_000204	1.14372	0.000244255	Solyc09g092640.3	-1.02909	2.95e-07	0.995807	2.63356e-05
Lnc_000204	1.14372	0.000244255	Solyc10g005550.2	3.18102	4.26e-53	0.995182	3.47597e-05
Lnc_000204	1.14372	0.000244255	Solyc10g005880.3	1.55718	5.76e-11	0.997559	8.92796e-06
Lnc_000204	1.14372	0.000244255	Solyc10g007103.1	-1.95547	3.86e-11	0.990951	0.000122461
Lnc_000204	1.14372	0.000244255	Solyc10g008470.3	1.1184	3.52e-06	0.998036	5.7804e-06
Lnc_000204	1.14372	0.000244255	Solyc10g009290.1	-1.0371	1.6e-07	-0.991043	0.000119983
Lnc_000204	1.14372	0.000244255	Solyc10g044967.1	1.29547	1.38e-08	0.998118	5.30713e-06
Lnc_000204	1.14372	0.000244255	Solyc10g079630.1	-1.16234	2.84e-06	-0.99932	6.93651e-07
Lnc_000204	1.14372	0.000244255	Solyc10g081520.1	-1.01846	6.79e-08	0.993316	6.68616e-05
Lnc_000204	1.14372	0.000244255	Solyc10g085030.1	-1.40789	6.3e-11	0.998155	5.10255e-06
Lnc_000204	1.14372	0.000244255	Solyc10g085040.1	-1.40789	6.3e-11	0.998155	5.10255e-06
Lnc_000204	1.14372	0.000244255	Solyc11g006570.2	1.23664	1.95e-06	0.992067	9.41548e-05
Lnc_000204	1.14372	0.000244255	Solyc11g007370.2	1.72774	1.97e-13	0.995775	2.6736e-05
Lnc_000204	1.14372	0.000244255	Solyc11g007390.1	1.72774	1.97e-13	0.995775	2.6736e-05
Lnc_000204	1.14372	0.000244255	Solyc11g007460.1	1.72774	1.97e-13	0.995775	2.6736e-05
Lnc_000204	1.14372	0.000244255	Solyc11g065190.2	-1.89012	1.89e-10	-0.991993	9.59219e-05
Lnc_000204	1.14372	0.000244255	Solyc11g071200.2	1.184	6.47e-07	0.993801	5.75197e-05
Lnc_000204	1.14372	0.000244255	Solyc11g071205.1	1.184	6.47e-07	0.993801	5.75197e-05
Lnc_000204	1.14372	0.000244255	Solyc11g071210.2	1.184	6.47e-07	0.993801	5.75197e-05
Lnc_000204	1.14372	0.000244255	Solyc11g072470.2	1.32809	2.89e-06	0.996669	1.66245e-05
Lnc_000204	1.14372	0.000244255	Solyc12g008840.2	1.55973	2.34e-09	0.991835	9.97317e-05
Lnc_000204	1.14372	0.000244255	Solyc12g010740.2	1.17299	7.54e-06	0.99865	2.73103e-06
Lnc_000204	1.14372	0.000244255	Solyc12g010745.1	1.17299	7.54e-06	0.99865	2.73103e-06
Lnc_000204	1.14372	0.000244255	Solyc12g010750.2	1.17299	7.54e-06	0.99865	2.73103e-06
Lnc_000204	1.14372	0.000244255	Solyc12g013680.2	-1.51588	6.31e-13	0.998862	1.94183e-06
Lnc_000204	1.14372	0.000244255	Solyc12g014100.2	1.57397	2.88e-10	0.994086	5.23623e-05
Lnc_000204	1.14372	0.000244255	Solyc12g014140.2	1.57397	2.88e-10	-0.990628	0.000131336
Lnc_000204	1.14372	0.000244255	Solyc12g017850.2	1.75969	9.18e-16	0.994274	4.90794e-05
Lnc_000204	1.14372	0.000244255	Solyc12g021160.1	1.13825	0.000517772	0.990868	0.000124699
Lnc_000204	1.14372	0.000244255	Solyc12g027540.2	1.59516	3.56e-11	0.996726	1.60568e-05
Lnc_000204	1.14372	0.000244255	Solyc12g056600.3	1.9781	3.06e-15	0.990433	0.000136867
Lnc_000204	1.14372	0.000244255	Solyc12g088760.1	2.79215	2.19e-30	-0.996278	2.07579e-05
Lnc_000204	1.14372	0.000244255	Solyc12g099290.2	-1.2747	6.75e-08	-0.99126	0.000114239
Lnc_000204	1.14372	0.000244255	Solyc12g099440.2	-1.2747	6.75e-08	0.996702	1.62964e-05
Lnc_000206	3.519	0.0218167	Solyc01g006530.1	3.36908	1.39e-39	0.992259	8.9657e-05
Lnc_000206	3.519	0.0218167	Solyc01g008070.3	-1.90874	2.86e-11	0.991681	0.000103524
Lnc_000206	3.519	0.0218167	Solyc01g009670.3	1.04096	0.000226017	0.996963	1.38202e-05
Lnc_000206	3.519	0.0218167	Solyc01g015290.1	-1.09391	1.67e-10	0.994273	4.91e-05
Lnc_000206	3.519	0.0218167	Solyc01g060240.3	2.23441	4.86e-14	0.994078	5.25021e-05
Lnc_000206	3.519	0.0218167	Solyc01g066450.3	-1.11697	4.37e-10	0.991543	0.000106981
Lnc_000206	3.519	0.0218167	Solyc01g066700.3	2.51099	1.69e-16	0.994026	5.3427e-05
Lnc_000206	3.519	0.0218167	Solyc01g066710.3	2.51099	1.69e-16	0.994026	5.3427e-05
Lnc_000206	3.519	0.0218167	Solyc01g079900.1	2.32719	1.2e-18	0.994395	4.70404e-05
Lnc_000206	3.519	0.0218167	Solyc01g079940.3	2.32719	1.2e-18	0.994395	4.70404e-05
Lnc_000206	3.519	0.0218167	Solyc01g079950.3	2.32719	1.2e-18	0.994395	4.70404e-05
Lnc_000206	3.519	0.0218167	Solyc01g080010.2	1.88251	1.02e-09	0.996771	1.56192e-05
Lnc_000206	3.519	0.0218167	Solyc01g086670.3	2.10602	3.87e-12	0.997918	6.49599e-06
Lnc_000206	3.519	0.0218167	Solyc01g086680.3	2.10602	3.87e-12	0.993609	6.11297e-05
Lnc_000206	3.519	0.0218167	Solyc01g086730.3	-1.31888	4.66e-09	0.99062	0.000131569
Lnc_000206	3.519	0.0218167	Solyc01g091250.3	2.00613	5.18e-13	0.992056	9.44164e-05
Lnc_000206	3.519	0.0218167	Solyc01g098730.2	1.8075	3.24e-10	0.995682	2.79228e-05
Lnc_000206	3.519	0.0218167	Solyc01g100370.3	-1.1022	2.32e-10	0.994186	5.06112e-05
Lnc_000206	3.519	0.0218167	Solyc01g100460.3	-1.06717	2.76e-09	0.990839	0.000125491
Lnc_000206	3.519	0.0218167	Solyc01g100480.3	-1.06717	2.76e-09	0.990839	0.000125491
Lnc_000206	3.519	0.0218167	Solyc01g102890.3	1.0793	0.00345247	0.992759	7.84582e-05
Lnc_000206	3.519	0.0218167	Solyc01g105360.3	1.27155	0.000335741	0.991092	0.000118677
Lnc_000206	3.519	0.0218167	Solyc01g105370.3	1.27155	0.000335741	0.991092	0.000118677
Lnc_000206	3.519	0.0218167	Solyc01g105390.3	1.27155	0.000335741	0.991092	0.000118677
Lnc_000206	3.519	0.0218167	Solyc01g107080.3	1.40932	4.12e-05	0.997119	1.24349e-05
Lnc_000206	3.519	0.0218167	Solyc01g107100.3	1.4693	0.00033078	0.994476	4.56835e-05
Lnc_000206	3.519	0.0218167	Solyc01g107820.2	1.39793	3.5e-05	0.990773	0.000127305
Lnc_000206	3.519	0.0218167	Solyc01g107830.3	2.99972	1.06e-26	0.998118	5.31185e-06
Lnc_000206	3.519	0.0218167	Solyc01g108900.3	2.45726	2.27e-21	0.996209	2.15252e-05
Lnc_000206	3.519	0.0218167	Solyc01g109170.3	1.15617	0.00038355	0.99383	5.69791e-05
Lnc_000206	3.519	0.0218167	Solyc01g110510.3	-1.46971	1.59e-11	0.997338	1.06229e-05
Lnc_000206	3.519	0.0218167	Solyc02g032820.3	3.37157	5.07e-38	0.990797	0.000126653
Lnc_000206	3.519	0.0218167	Solyc02g037495.1	1.339	2.82e-06	0.996105	2.27218e-05
Lnc_000206	3.519	0.0218167	Solyc02g061770.3	2.839	1.06e-16	0.995315	3.28693e-05
Lnc_000206	3.519	0.0218167	Solyc02g062710.1	1.84805	1.82e-08	0.990691	0.000129579
Lnc_000206	3.519	0.0218167	Solyc02g064720.3	-2.2644	6.96e-26	0.993068	7.19155e-05
Lnc_000206	3.519	0.0218167	Solyc02g067230.3	-1.61579	2.63e-13	0.991624	0.000104943
Lnc_000206	3.519	0.0218167	Solyc02g067440.3	-1.45694	1.3e-08	0.990149	0.000145077
Lnc_000206	3.519	0.0218167	Solyc02g070090.1	-1.43767	3.2e-12	0.995417	3.14637e-05
Lnc_000206	3.519	0.0218167	Solyc02g071970.1	2.07583	1.01e-16	0.991971	9.64338e-05
Lnc_000206	3.519	0.0218167	Solyc02g077070.3	-2.31049	1.25e-19	0.997022	1.32935e-05
Lnc_000206	3.519	0.0218167	Solyc02g079230.3	-1.25797	8.91e-10	0.99433	4.81369e-05
Lnc_000206	3.519	0.0218167	Solyc02g079530.3	-3.92685	1.36e-86	0.997379	1.02975e-05
Lnc_000206	3.519	0.0218167	Solyc02g079533.1	-3.92685	1.36e-86	0.997379	1.02975e-05
Lnc_000206	3.519	0.0218167	Solyc02g079540.2	1.48859	1.87e-09	0.997379	1.02975e-05
Lnc_000206	3.519	0.0218167	Solyc02g079550.2	1.48859	1.87e-09	0.997379	1.02975e-05
Lnc_000206	3.519	0.0218167	Solyc02g080930.2	-2.53514	2.11e-29	0.994399	4.69767e-05
Lnc_000206	3.519	0.0218167	Solyc02g082890.1	-1.52425	1.5e-07	0.990503	0.000134857
Lnc_000206	3.519	0.0218167	Solyc02g082910.3	-1.52425	1.5e-07	0.990833	0.000125677
Lnc_000206	3.519	0.0218167	Solyc02g082920.3	3.42701	6.17e-30	0.997076	1.28114e-05
Lnc_000206	3.519	0.0218167	Solyc02g083730.3	-2.46881	5.11e-23	0.992337	8.78676e-05
Lnc_000206	3.519	0.0218167	Solyc02g084850.3	4.08528	4.59e-42	0.997031	1.32051e-05
Lnc_000206	3.519	0.0218167	Solyc02g086530.3	1.9498	9.16e-16	0.994567	4.42019e-05
Lnc_000206	3.519	0.0218167	Solyc02g088180.3	-1.35372	1.77e-12	0.997134	1.23132e-05
Lnc_000206	3.519	0.0218167	Solyc02g088560.3	1.40005	3.77e-09	0.997121	1.24198e-05
Lnc_000206	3.519	0.0218167	Solyc02g089150.3	-1.14732	2.9e-09	0.997586	8.73262e-06
Lnc_000206	3.519	0.0218167	Solyc02g089190.2	-1.14732	2.9e-09	0.99014	0.000145336
Lnc_000206	3.519	0.0218167	Solyc02g093050.3	-1.21091	6.47e-08	0.996822	1.51295e-05
Lnc_000206	3.519	0.0218167	Solyc03g005910.3	2.28991	1.25e-15	0.994112	5.19073e-05
Lnc_000206	3.519	0.0218167	Solyc03g006360.3	2.78324	5.62e-27	0.99242	8.59599e-05
Lnc_000206	3.519	0.0218167	Solyc03g006490.3	1.49018	1.96e-06	0.990171	0.000144446
Lnc_000206	3.519	0.0218167	Solyc03g031450.3	-1.70108	1.76e-18	0.997964	6.21555e-06
Lnc_000206	3.519	0.0218167	Solyc03g031520.3	-1.70108	1.76e-18	0.991242	0.000114729
Lnc_000206	3.519	0.0218167	Solyc03g031890.3	1.09198	3.45e-06	0.991742	0.000102014
Lnc_000206	3.519	0.0218167	Solyc03g033840.3	-1.15851	3.16e-11	0.991952	9.6906e-05
Lnc_000206	3.519	0.0218167	Solyc03g043880.3	1.58354	1.14e-08	0.992303	8.86453e-05
Lnc_000206	3.519	0.0218167	Solyc03g043900.1	1.58354	1.14e-08	0.993719	5.90457e-05
Lnc_000206	3.519	0.0218167	Solyc03g044960.2	1.31016	2.38e-07	0.996009	2.38659e-05
Lnc_000206	3.519	0.0218167	Solyc03g065250.3	-2.09744	7.41e-28	0.997554	8.9675e-06
Lnc_000206	3.519	0.0218167	Solyc03g082640.2	1.0487	0.00814196	0.997375	1.03242e-05
Lnc_000206	3.519	0.0218167	Solyc03g094120.3	-1.12996	5.85e-08	0.992866	7.61663e-05
Lnc_000206	3.519	0.0218167	Solyc03g098740.1	2.70376	1.91e-34	0.994221	5.00041e-05
Lnc_000206	3.519	0.0218167	Solyc03g111720.3	1.50817	6.82e-06	0.99202	9.52745e-05
Lnc_000206	3.519	0.0218167	Solyc03g112080.1	1.19528	0.000188674	0.998742	2.3711e-06
Lnc_000206	3.519	0.0218167	Solyc03g116480.1	2.09092	2.1e-13	0.99847	3.51044e-06
Lnc_000206	3.519	0.0218167	Solyc03g117675.1	-3.02206	7.7e-42	0.998321	4.22868e-06
Lnc_000206	3.519	0.0218167	Solyc03g119300.3	-1.99207	1.41e-22	0.994009	5.37316e-05
Lnc_000206	3.519	0.0218167	Solyc03g119305.1	-1.99207	1.41e-22	0.994009	5.37316e-05
Lnc_000206	3.519	0.0218167	Solyc04g005410.2	1.31045	2.33e-16	0.997921	6.48141e-06
Lnc_000206	3.519	0.0218167	Solyc04g005610.3	2.19867	1.93e-18	0.990259	0.000141878
Lnc_000206	3.519	0.0218167	Solyc04g007000.1	2.34038	7.04e-18	0.995984	2.41588e-05
Lnc_000206	3.519	0.0218167	Solyc04g011340.3	-1.14139	5.56e-13	0.992437	8.55839e-05
Lnc_000206	3.519	0.0218167	Solyc04g011450.2	1.36813	0.0308824	0.994715	4.1825e-05
Lnc_000206	3.519	0.0218167	Solyc04g011750.3	-1.21042	7.65e-12	0.99645	1.88864e-05
Lnc_000206	3.519	0.0218167	Solyc04g011800.1	1.13156	0.00593237	0.997363	1.04198e-05
Lnc_000206	3.519	0.0218167	Solyc04g016470.3	2.03824	2.13e-27	0.995427	3.13196e-05
Lnc_000206	3.519	0.0218167	Solyc04g054340.1	1.21783	0.00208715	0.996407	1.93436e-05
Lnc_000206	3.519	0.0218167	Solyc04g071770.3	-1.09123	5.86e-08	0.997158	1.21046e-05
Lnc_000206	3.519	0.0218167	Solyc04g072280.3	1.19957	0.00387709	0.99739	1.02084e-05
Lnc_000206	3.519	0.0218167	Solyc04g080530.3	1.05899	0.00120108	0.995551	2.96456e-05
Lnc_000206	3.519	0.0218167	Solyc04g081960.1	2.03811	7.69e-12	0.996983	1.36377e-05
Lnc_000206	3.519	0.0218167	Solyc05g008310.3	-2.806	1.89e-16	0.990007	0.000149306
Lnc_000206	3.519	0.0218167	Solyc05g008910.3	1.84223	5.62e-16	0.997928	6.43413e-06
Lnc_000206	3.519	0.0218167	Solyc05g010390.1	1.74298	0.000460738	0.99816	5.07705e-06
Lnc_000206	3.519	0.0218167	Solyc05g013530.3	2.02761	6.31e-36	0.99198	9.62148e-05
Lnc_000206	3.519	0.0218167	Solyc05g014300.1	4.21093	8.96e-37	0.994611	4.3481e-05
Lnc_000206	3.519	0.0218167	Solyc05g015490.3	1.5945	1.62e-05	0.990339	0.000139542
Lnc_000206	3.519	0.0218167	Solyc05g015850.3	-1.73423	6.94e-26	0.990211	0.000143262
Lnc_000206	3.519	0.0218167	Solyc05g023980.2	2.99782	2.94e-22	0.991438	0.000109652
Lnc_000206	3.519	0.0218167	Solyc05g039950.2	-1.08778	1.26e-07	0.991572	0.000106244
Lnc_000206	3.519	0.0218167	Solyc05g041200.3	-1.08778	1.26e-07	0.994552	4.44431e-05
Lnc_000206	3.519	0.0218167	Solyc05g050240.3	1.43211	1.65e-05	0.99288	7.58512e-05
Lnc_000206	3.519	0.0218167	Solyc05g051900.3	1.18472	0.000101436	0.993299	6.71992e-05
Lnc_000206	3.519	0.0218167	Solyc05g052410.2	-1.099	2.62e-15	0.996863	1.47433e-05
Lnc_000206	3.519	0.0218167	Solyc05g052670.1	-2.01608	2.25e-21	0.996915	1.42616e-05
Lnc_000206	3.519	0.0218167	Solyc05g052680.1	1.33218	1e-05	0.996915	1.42616e-05
Lnc_000206	3.519	0.0218167	Solyc05g053330.3	1.70859	1.61e-10	0.990131	0.000145625
Lnc_000206	3.519	0.0218167	Solyc06g009000.1	-1.66822	5.22e-12	0.991479	0.000108599
Lnc_000206	3.519	0.0218167	Solyc06g010060.1	1.25383	3.33e-06	0.991035	0.000120198
Lnc_000206	3.519	0.0218167	Solyc06g036130.3	-2.15304	7.8e-31	0.994988	3.76208e-05
Lnc_000206	3.519	0.0218167	Solyc06g053260.1	3.53881	2.33e-24	0.99506	3.65416e-05
Lnc_000206	3.519	0.0218167	Solyc06g053700.1	2.1506	7.94e-12	0.996287	2.06537e-05
Lnc_000206	3.519	0.0218167	Solyc06g063280.1	1.13375	0.00153267	0.994601	4.36478e-05
Lnc_000206	3.519	0.0218167	Solyc06g066360.2	-1.01497	3.03e-09	0.994448	4.61449e-05
Lnc_000206	3.519	0.0218167	Solyc06g068160.3	1.76355	2.44e-05	0.994786	4.07123e-05
Lnc_000206	3.519	0.0218167	Solyc06g068170.2	1.76355	2.44e-05	0.994786	4.07123e-05
Lnc_000206	3.519	0.0218167	Solyc06g071890.3	2.18387	1e-15	0.994308	4.84992e-05
Lnc_000206	3.519	0.0218167	Solyc06g072210.1	3.9949	2.11e-73	0.990529	0.000134113
Lnc_000206	3.519	0.0218167	Solyc06g083590.3	1.22372	5.57e-08	0.990672	0.000130122
Lnc_000206	3.519	0.0218167	Solyc06g083595.1	1.22372	5.57e-08	0.990672	0.000130122
Lnc_000206	3.519	0.0218167	Solyc07g006500.3	2.0694	3.41e-10	0.993742	5.86295e-05
Lnc_000206	3.519	0.0218167	Solyc07g017610.3	1.03269	0.0225047	0.990012	0.000149133
Lnc_000206	3.519	0.0218167	Solyc07g043310.3	-1.63569	7.85e-19	0.995816	2.62284e-05
Lnc_000206	3.519	0.0218167	Solyc07g052120.3	2.39714	4.93e-11	0.992235	9.02143e-05
Lnc_000206	3.519	0.0218167	Solyc07g055670.1	1.22046	0.00225679	0.990109	0.000146276
Lnc_000206	3.519	0.0218167	Solyc07g055690.1	1.22046	0.00225679	0.990109	0.000146276
Lnc_000206	3.519	0.0218167	Solyc07g056390.3	1.09449	0.000592433	0.991713	0.00010273
Lnc_000206	3.519	0.0218167	Solyc07g056670.3	1.06086	0.000247842	0.992662	8.05697e-05
Lnc_000206	3.519	0.0218167	Solyc07g061720.3	5.30199	2.95e-98	0.99318	6.96164e-05
Lnc_000206	3.519	0.0218167	Solyc07g062480.1	2.3671	6e-19	0.990401	0.000137775
Lnc_000206	3.519	0.0218167	Solyc07g062490.1	2.3671	6e-19	0.994645	4.29423e-05
Lnc_000206	3.519	0.0218167	Solyc07g063410.3	-1.35171	9.1e-16	0.99337	6.57988e-05
Lnc_000206	3.519	0.0218167	Solyc07g063700.2	1.77584	1.37e-07	0.994663	4.26441e-05
Lnc_000206	3.519	0.0218167	Solyc07g063710.2	1.77584	1.37e-07	0.994663	4.26441e-05
Lnc_000206	3.519	0.0218167	Solyc07g063850.3	1.77584	1.37e-07	0.995071	3.6376e-05
Lnc_000206	3.519	0.0218167	Solyc07g065960.1	3.24691	3.93e-27	0.996811	1.52387e-05
Lnc_000206	3.519	0.0218167	Solyc07g065970.1	3.24691	3.93e-27	0.996811	1.52387e-05
Lnc_000206	3.519	0.0218167	Solyc07g065980.3	3.24691	3.93e-27	0.994731	4.15633e-05
Lnc_000206	3.519	0.0218167	Solyc07g065985.1	3.24691	3.93e-27	0.994731	4.15633e-05
Lnc_000206	3.519	0.0218167	Solyc08g023510.2	-1.08735	3.54e-13	0.995174	3.48807e-05
Lnc_000206	3.519	0.0218167	Solyc08g065710.2	1.08431	2.34e-05	0.995396	3.17473e-05
Lnc_000206	3.519	0.0218167	Solyc08g068070.3	1.65348	9.16e-06	0.990815	0.000126165
Lnc_000206	3.519	0.0218167	Solyc08g068850.3	-1.5875	1.7e-12	0.990616	0.000131676
Lnc_000206	3.519	0.0218167	Solyc08g077410.3	1.12817	6.54e-05	0.997531	9.13844e-06
Lnc_000206	3.519	0.0218167	Solyc08g077530.3	1.34022	4.92e-05	0.993633	6.06831e-05
Lnc_000206	3.519	0.0218167	Solyc08g078040.3	3.20512	2.37e-29	0.99538	3.19628e-05
Lnc_000206	3.519	0.0218167	Solyc08g078690.3	1.27144	0.000740617	0.990115	0.000146084
Lnc_000206	3.519	0.0218167	Solyc08g078695.1	1.27144	0.000740617	0.990115	0.000146084
Lnc_000206	3.519	0.0218167	Solyc08g081680.2	1.75659	2.41e-07	0.994516	4.50323e-05
Lnc_000206	3.519	0.0218167	Solyc08g081740.3	1.15348	0.0004956	0.996	2.3964e-05
Lnc_000206	3.519	0.0218167	Solyc09g011470.3	1.62302	7.97e-07	0.9944	4.69502e-05
Lnc_000206	3.519	0.0218167	Solyc09g014910.3	-1.05727	3.68e-05	0.994414	4.67104e-05
Lnc_000206	3.519	0.0218167	Solyc09g018740.1	-1.48672	1.3e-17	0.990257	0.000141936
Lnc_000206	3.519	0.0218167	Solyc09g065540.3	1.20604	6.19e-05	0.995042	3.6805e-05
Lnc_000206	3.519	0.0218167	Solyc09g065560.3	1.20604	6.19e-05	0.996941	1.40262e-05
Lnc_000206	3.519	0.0218167	Solyc09g065660.3	2.15691	3.57e-10	0.99274	7.88731e-05
Lnc_000206	3.519	0.0218167	Solyc09g066300.2	-1.5385	1.62e-13	-0.998674	2.63671e-06
Lnc_000206	3.519	0.0218167	Solyc09g072880.3	2.30183	4.08e-17	0.998462	3.54833e-06
Lnc_000206	3.519	0.0218167	Solyc09g072885.1	2.30183	4.08e-17	0.998462	3.54833e-06
Lnc_000206	3.519	0.0218167	Solyc09g074350.1	-1.73545	0.000611683	0.9956	2.8997e-05
Lnc_000206	3.519	0.0218167	Solyc09g082340.2	2.76443	3.6e-33	0.994051	5.29787e-05
Lnc_000206	3.519	0.0218167	Solyc09g089580.3	3.14772	8.25e-29	0.994192	5.04963e-05
Lnc_000206	3.519	0.0218167	Solyc09g089930.2	2.38529	4.22e-18	0.997862	6.85478e-06
Lnc_000206	3.519	0.0218167	Solyc09g097950.2	3.6804	1.77e-60	0.991824	0.000100001
Lnc_000206	3.519	0.0218167	Solyc09g097960.3	3.6804	1.77e-60	0.991824	0.000100001
Lnc_000206	3.519	0.0218167	Solyc10g007880.3	2.49462	2.19e-18	0.996828	1.50753e-05
Lnc_000206	3.519	0.0218167	Solyc10g051010.2	1.31142	4.67e-06	0.996169	2.19864e-05
Lnc_000206	3.519	0.0218167	Solyc10g051020.2	1.31142	4.67e-06	0.996169	2.19864e-05
Lnc_000206	3.519	0.0218167	Solyc10g051030.2	1.31142	4.67e-06	0.996169	2.19864e-05
Lnc_000206	3.519	0.0218167	Solyc10g075090.2	4.26084	3.04e-07	0.995196	3.45633e-05
Lnc_000206	3.519	0.0218167	Solyc10g083690.3	-1.03627	5.08e-09	0.99411	5.19342e-05
Lnc_000206	3.519	0.0218167	Solyc10g084960.2	-1.71064	0.00224983	0.992821	7.71241e-05
Lnc_000206	3.519	0.0218167	Solyc10g085860.1	1.68757	9.71e-09	0.996727	1.60475e-05
Lnc_000206	3.519	0.0218167	Solyc11g006720.2	1.59168	2.36e-09	0.993216	6.88766e-05
Lnc_000206	3.519	0.0218167	Solyc11g006735.1	1.59168	2.36e-09	0.993216	6.88766e-05
Lnc_000206	3.519	0.0218167	Solyc11g006740.2	1.59168	2.36e-09	0.993216	6.88766e-05
Lnc_000206	3.519	0.0218167	Solyc11g007490.1	1.72774	1.97e-13	0.997001	1.34751e-05
Lnc_000206	3.519	0.0218167	Solyc11g007500.2	1.72774	1.97e-13	0.996648	1.683e-05
Lnc_000206	3.519	0.0218167	Solyc11g007930.1	-1.45377	1.19e-12	-0.992901	7.54055e-05
Lnc_000206	3.519	0.0218167	Solyc11g010380.2	-1.63934	1.94e-14	0.992013	9.54405e-05
Lnc_000206	3.519	0.0218167	Solyc11g027773.1	-2.78955	1.06e-32	0.993747	5.85294e-05
Lnc_000206	3.519	0.0218167	Solyc11g062400.2	-1.01299	4.55e-05	0.993823	5.71112e-05
Lnc_000206	3.519	0.0218167	Solyc11g069640.2	1.40702	4.32e-05	0.99205	9.45507e-05
Lnc_000206	3.519	0.0218167	Solyc11g069650.2	1.40702	4.32e-05	0.99205	9.45507e-05
Lnc_000206	3.519	0.0218167	Solyc11g069660.2	1.40702	4.32e-05	0.99205	9.45507e-05
Lnc_000206	3.519	0.0218167	Solyc11g069670.2	1.40702	4.32e-05	0.99205	9.45507e-05
Lnc_000206	3.519	0.0218167	Solyc11g072630.2	-1.42049	1.01e-16	0.996086	2.29466e-05
Lnc_000206	3.519	0.0218167	Solyc12g005850.2	1.58661	0.00244183	0.99653	1.80372e-05
Lnc_000206	3.519	0.0218167	Solyc12g008850.2	1.08885	1.98e-06	0.991326	0.000112536
Lnc_000206	3.519	0.0218167	Solyc12g013580.2	1.91146	1.03e-10	0.998117	5.31648e-06
Lnc_000206	3.519	0.0218167	Solyc12g013700.2	2.75225	2.05e-24	0.997959	6.24564e-06
Lnc_000206	3.519	0.0218167	Solyc12g014010.2	2.07416	2.2e-14	0.995996	2.40158e-05
Lnc_000206	3.519	0.0218167	Solyc12g042600.2	1.19584	0.000482862	0.994566	4.4211e-05
Lnc_000206	3.519	0.0218167	Solyc12g056590.2	2.8917	1.48e-19	0.993674	5.99011e-05
Lnc_000206	3.519	0.0218167	Solyc12g096570.1	3.86636	9.32e-68	0.996435	1.90425e-05
Lnc_000206	3.519	0.0218167	Solyc12g098900.2	-1.13782	2.55e-10	0.990308	0.000140448
Lnc_000207	2.55747	0.0175506	Solyc01g006530.1	3.36908	1.39e-39	0.995481	3.05794e-05
Lnc_000207	2.55747	0.0175506	Solyc01g017150.1	-1.09391	1.67e-10	0.996157	2.21213e-05
Lnc_000207	2.55747	0.0175506	Solyc01g066700.3	2.51099	1.69e-16	0.993538	6.24971e-05
Lnc_000207	2.55747	0.0175506	Solyc01g066710.3	2.51099	1.69e-16	0.993538	6.24971e-05
Lnc_000207	2.55747	0.0175506	Solyc01g079300.3	1.45116	1.63e-11	0.997929	6.43105e-06
Lnc_000207	2.55747	0.0175506	Solyc01g080010.2	1.88251	1.02e-09	0.993307	6.70435e-05
Lnc_000207	2.55747	0.0175506	Solyc01g086680.3	2.10602	3.87e-12	0.99661	1.7216e-05
Lnc_000207	2.55747	0.0175506	Solyc01g086730.3	-1.31888	4.66e-09	0.998348	4.09264e-06
Lnc_000207	2.55747	0.0175506	Solyc01g091050.3	3.10205	8.8e-20	0.999427	4.93079e-07
Lnc_000207	2.55747	0.0175506	Solyc01g091250.3	2.00613	5.18e-13	0.995152	3.52011e-05
Lnc_000207	2.55747	0.0175506	Solyc01g097280.2	1.75038	2.01e-08	0.998069	5.58693e-06
Lnc_000207	2.55747	0.0175506	Solyc01g104740.3	1.2815	0.000118193	0.99837	3.98508e-06
Lnc_000207	2.55747	0.0175506	Solyc01g106105.1	3.71879	1.71e-60	0.995948	2.45938e-05
Lnc_000207	2.55747	0.0175506	Solyc01g107090.2	1.4693	0.00033078	0.997905	6.58052e-06
Lnc_000207	2.55747	0.0175506	Solyc01g107100.3	1.4693	0.00033078	0.996074	2.30914e-05
Lnc_000207	2.55747	0.0175506	Solyc01g107820.2	1.39793	3.5e-05	0.996868	1.46987e-05
Lnc_000207	2.55747	0.0175506	Solyc01g109140.3	1.15617	0.00038355	0.999537	3.20877e-07
Lnc_000207	2.55747	0.0175506	Solyc02g032820.3	3.37157	5.07e-38	0.997947	6.32045e-06
Lnc_000207	2.55747	0.0175506	Solyc02g068470.1	-1.15838	4.92e-11	0.995112	3.57747e-05
Lnc_000207	2.55747	0.0175506	Solyc02g077370.1	3.97473	2.09e-48	0.999056	1.33551e-06
Lnc_000207	2.55747	0.0175506	Solyc02g080920.2	-2.53514	2.11e-29	0.994479	4.5644e-05
Lnc_000207	2.55747	0.0175506	Solyc02g082920.3	3.42701	6.17e-30	0.990818	0.000126076
Lnc_000207	2.55747	0.0175506	Solyc02g084840.3	1.58614	3.1e-06	0.997106	1.25536e-05
Lnc_000207	2.55747	0.0175506	Solyc02g085260.1	1.29615	0.000811824	0.993377	6.56431e-05
Lnc_000207	2.55747	0.0175506	Solyc02g092860.3	1.68213	2.11e-05	0.996247	2.11037e-05
Lnc_000207	2.55747	0.0175506	Solyc03g006490.3	1.49018	1.96e-06	0.991517	0.000107628
Lnc_000207	2.55747	0.0175506	Solyc03g044960.2	1.31016	2.38e-07	0.991198	0.000115874
Lnc_000207	2.55747	0.0175506	Solyc03g065250.3	-2.09744	7.41e-28	0.991089	0.000118767
Lnc_000207	2.55747	0.0175506	Solyc03g098100.3	4.05716	2.89e-48	0.998994	1.51769e-06
Lnc_000207	2.55747	0.0175506	Solyc03g098740.1	2.70376	1.91e-34	0.993133	7.05786e-05
Lnc_000207	2.55747	0.0175506	Solyc03g111720.3	1.50817	6.82e-06	0.996961	1.38392e-05
Lnc_000207	2.55747	0.0175506	Solyc04g011450.2	1.36813	0.0308824	0.993849	5.66307e-05
Lnc_000207	2.55747	0.0175506	Solyc04g016470.3	2.03824	2.13e-27	0.990593	0.000132309
Lnc_000207	2.55747	0.0175506	Solyc04g076440.1	2.1599	3.06e-06	0.995235	3.40056e-05
Lnc_000207	2.55747	0.0175506	Solyc04g076690.3	1.50562	9.79e-08	0.998795	2.17814e-06
Lnc_000207	2.55747	0.0175506	Solyc04g076695.1	1.50562	9.79e-08	0.998795	2.17814e-06
Lnc_000207	2.55747	0.0175506	Solyc04g076710.3	1.50562	9.79e-08	0.998795	2.17814e-06
Lnc_000207	2.55747	0.0175506	Solyc05g008910.3	1.84223	5.62e-16	0.990766	0.000127496
Lnc_000207	2.55747	0.0175506	Solyc05g010517.1	1.74298	0.000460738	0.994527	4.48502e-05
Lnc_000207	2.55747	0.0175506	Solyc05g014300.1	4.21093	8.96e-37	0.994512	4.50936e-05
Lnc_000207	2.55747	0.0175506	Solyc05g023980.2	2.99782	2.94e-22	0.995771	2.67944e-05
Lnc_000207	2.55747	0.0175506	Solyc05g039950.2	-1.08778	1.26e-07	0.99349	6.34386e-05
Lnc_000207	2.55747	0.0175506	Solyc05g050240.3	1.43211	1.65e-05	0.996798	1.53593e-05
Lnc_000207	2.55747	0.0175506	Solyc05g053330.3	1.70859	1.61e-10	0.997172	1.19873e-05
Lnc_000207	2.55747	0.0175506	Solyc05g053600.3	1.4207	1.86e-05	0.997604	8.60599e-06
Lnc_000207	2.55747	0.0175506	Solyc06g065050.2	-2.54337	7.99e-31	0.9976	8.63252e-06
Lnc_000207	2.55747	0.0175506	Solyc06g066360.2	-1.01497	3.03e-09	0.995524	3.00016e-05
Lnc_000207	2.55747	0.0175506	Solyc06g067980.3	1.76355	2.44e-05	0.995734	2.7262e-05
Lnc_000207	2.55747	0.0175506	Solyc06g068160.3	1.76355	2.44e-05	0.994577	4.40322e-05
Lnc_000207	2.55747	0.0175506	Solyc06g068170.2	1.76355	2.44e-05	0.994577	4.40322e-05
Lnc_000207	2.55747	0.0175506	Solyc06g069150.1	1.07239	0.0381529	0.991635	0.000104675
Lnc_000207	2.55747	0.0175506	Solyc06g072335.1	3.9949	2.11e-73	0.999441	4.68593e-07
Lnc_000207	2.55747	0.0175506	Solyc07g006500.3	2.0694	3.41e-10	0.996163	2.20515e-05
Lnc_000207	2.55747	0.0175506	Solyc07g049200.3	-1.64279	5.81e-14	0.99511	3.58058e-05
Lnc_000207	2.55747	0.0175506	Solyc07g055670.1	1.22046	0.00225679	0.997068	1.28822e-05
Lnc_000207	2.55747	0.0175506	Solyc07g055690.1	1.22046	0.00225679	0.997068	1.28822e-05
Lnc_000207	2.55747	0.0175506	Solyc07g056670.3	1.06086	0.000247842	0.992971	7.39415e-05
Lnc_000207	2.55747	0.0175506	Solyc07g063700.2	1.77584	1.37e-07	0.992457	8.51352e-05
Lnc_000207	2.55747	0.0175506	Solyc07g063710.2	1.77584	1.37e-07	0.992457	8.51352e-05
Lnc_000207	2.55747	0.0175506	Solyc07g063850.3	1.77584	1.37e-07	0.990756	0.000127789
Lnc_000207	2.55747	0.0175506	Solyc08g065710.2	1.08431	2.34e-05	0.99435	4.7802e-05
Lnc_000207	2.55747	0.0175506	Solyc08g077530.3	1.34022	4.92e-05	0.99656	1.77301e-05
Lnc_000207	2.55747	0.0175506	Solyc08g078690.3	1.27144	0.000740617	0.998702	2.52475e-06
Lnc_000207	2.55747	0.0175506	Solyc08g078695.1	1.27144	0.000740617	0.998702	2.52475e-06
Lnc_000207	2.55747	0.0175506	Solyc08g079420.3	1.95533	1.02e-08	0.997454	9.71646e-06
Lnc_000207	2.55747	0.0175506	Solyc08g081680.2	1.75659	2.41e-07	0.992727	7.91619e-05
Lnc_000207	2.55747	0.0175506	Solyc09g011540.2	2.80222	7.88e-12	0.993727	5.88945e-05
Lnc_000207	2.55747	0.0175506	Solyc09g056430.3	-1.23267	8.75e-12	0.994807	4.03788e-05
Lnc_000207	2.55747	0.0175506	Solyc09g065660.3	2.15691	3.57e-10	0.99297	7.39618e-05
Lnc_000207	2.55747	0.0175506	Solyc09g074350.1	-1.73545	0.000611683	0.993623	6.08673e-05
Lnc_000207	2.55747	0.0175506	Solyc09g090800.2	-1.11452	4.81e-08	0.999854	3.18833e-08
Lnc_000207	2.55747	0.0175506	Solyc09g091130.3	1.18091	0.00560651	0.998349	4.08591e-06
Lnc_000207	2.55747	0.0175506	Solyc10g011920.2	-1.00495	9.54e-11	0.995332	3.26377e-05
Lnc_000207	2.55747	0.0175506	Solyc10g011930.1	-1.00495	9.54e-11	0.995332	3.26377e-05
Lnc_000207	2.55747	0.0175506	Solyc10g049230.1	1.00437	0.0303759	0.996855	1.48219e-05
Lnc_000207	2.55747	0.0175506	Solyc10g052540.1	-1.09412	4.37e-11	0.99225	8.98595e-05
Lnc_000207	2.55747	0.0175506	Solyc10g076660.2	1.13294	3.88e-12	0.997404	1.00986e-05
Lnc_000207	2.55747	0.0175506	Solyc10g076680.1	1.13294	3.88e-12	0.997404	1.00986e-05
Lnc_000207	2.55747	0.0175506	Solyc10g078770.2	4.06536	1.8e-16	0.991459	0.000109106
Lnc_000207	2.55747	0.0175506	Solyc10g078780.2	1.04578	0.00195692	0.993303	6.71304e-05
Lnc_000207	2.55747	0.0175506	Solyc10g079900.2	1.38983	1.05e-11	0.999545	3.10576e-07
Lnc_000207	2.55747	0.0175506	Solyc11g027773.1	-2.78955	1.06e-32	0.992314	8.83761e-05
Lnc_000207	2.55747	0.0175506	Solyc11g062400.2	-1.01299	4.55e-05	0.995012	3.72552e-05
Lnc_000207	2.55747	0.0175506	Solyc11g069640.2	1.40702	4.32e-05	0.99572	2.74348e-05
Lnc_000207	2.55747	0.0175506	Solyc11g069650.2	1.40702	4.32e-05	0.99572	2.74348e-05
Lnc_000207	2.55747	0.0175506	Solyc11g069660.2	1.40702	4.32e-05	0.99572	2.74348e-05
Lnc_000207	2.55747	0.0175506	Solyc11g069670.2	1.40702	4.32e-05	0.99572	2.74348e-05
Lnc_000207	2.55747	0.0175506	Solyc11g072630.2	-1.42049	1.01e-16	0.993347	6.62396e-05
Lnc_000207	2.55747	0.0175506	Solyc11g072650.2	1.29602	7.78e-08	0.999294	7.47782e-07
Lnc_000207	2.55747	0.0175506	Solyc12g010920.2	3.61866	1.42e-21	0.996811	1.52365e-05
Lnc_000207	2.55747	0.0175506	Solyc12g044983.1	2.76459	2.68e-13	0.998758	2.31357e-06
Lnc_000207	2.55747	0.0175506	Solyc12g044987.1	2.76459	2.68e-13	0.998758	2.31357e-06
Lnc_000207	2.55747	0.0175506	Solyc12g056590.2	2.8917	1.48e-19	0.995514	3.01404e-05
Lnc_000207	2.55747	0.0175506	Solyc12g088850.1	2.79215	2.19e-30	0.998883	1.87067e-06
Lnc_000207	2.55747	0.0175506	Solyc12g096840.2	1.47666	3.04e-05	0.998391	3.88246e-06
Lnc_000207	2.55747	0.0175506	Solyc12g098900.2	-1.13782	2.55e-10	0.998429	3.69998e-06
Lnc_000214	1.48782	0.0372867	Solyc01g006530.1	3.36908	1.39e-39	0.991109	0.000118233
Lnc_000214	1.48782	0.0372867	Solyc01g009670.3	1.04096	0.000226017	0.990722	0.000128723
Lnc_000214	1.48782	0.0372867	Solyc01g017150.1	-1.09391	1.67e-10	0.991321	0.000112653
Lnc_000214	1.48782	0.0372867	Solyc01g066700.3	2.51099	1.69e-16	0.992361	8.73079e-05
Lnc_000214	1.48782	0.0372867	Solyc01g066710.3	2.51099	1.69e-16	0.992361	8.73079e-05
Lnc_000214	1.48782	0.0372867	Solyc01g080010.2	1.88251	1.02e-09	0.990481	0.000135476
Lnc_000214	1.48782	0.0372867	Solyc01g107100.3	1.4693	0.00033078	0.991085	0.000118856
Lnc_000214	1.48782	0.0372867	Solyc01g107820.2	1.39793	3.5e-05	0.991098	0.000118521
Lnc_000214	1.48782	0.0372867	Solyc01g108900.3	2.45726	2.27e-21	0.99062	0.000131553
Lnc_000214	1.48782	0.0372867	Solyc01g109920.2	-1.1115	4.52e-10	0.99188	9.86307e-05
Lnc_000214	1.48782	0.0372867	Solyc02g032820.3	3.37157	5.07e-38	0.990428	0.000137007
Lnc_000214	1.48782	0.0372867	Solyc02g082920.3	3.42701	6.17e-30	0.990116	0.00014606
Lnc_000214	1.48782	0.0372867	Solyc02g089190.2	-1.14732	2.9e-09	0.991342	0.000112121
Lnc_000214	1.48782	0.0372867	Solyc03g044960.2	1.31016	2.38e-07	0.991071	0.000119242
Lnc_000214	1.48782	0.0372867	Solyc04g011450.2	1.36813	0.0308824	0.992375	8.69878e-05
Lnc_000214	1.48782	0.0372867	Solyc04g076690.3	1.50562	9.79e-08	0.990566	0.000133088
Lnc_000214	1.48782	0.0372867	Solyc04g076695.1	1.50562	9.79e-08	0.990566	0.000133088
Lnc_000214	1.48782	0.0372867	Solyc04g076710.3	1.50562	9.79e-08	0.990566	0.000133088
Lnc_000214	1.48782	0.0372867	Solyc04g081960.1	2.03811	7.69e-12	0.990364	0.000138835
Lnc_000214	1.48782	0.0372867	Solyc05g014300.1	4.21093	8.96e-37	0.990687	0.000129694
Lnc_000214	1.48782	0.0372867	Solyc07g006500.3	2.0694	3.41e-10	0.990478	0.000135582
Lnc_000214	1.48782	0.0372867	Solyc08g077530.3	1.34022	4.92e-05	0.990253	0.000142051
Lnc_000214	1.48782	0.0372867	Solyc08g081680.2	1.75659	2.41e-07	0.990052	0.000147959
Lnc_000214	1.48782	0.0372867	Solyc09g011470.3	1.62302	7.97e-07	0.993308	6.702e-05
Lnc_000214	1.48782	0.0372867	Solyc09g074350.1	-1.73545	0.000611683	0.992342	8.77404e-05
Lnc_000214	1.48782	0.0372867	Solyc11g027773.1	-2.78955	1.06e-32	0.993898	5.57456e-05
Lnc_000214	1.48782	0.0372867	Solyc12g056590.2	2.8917	1.48e-19	0.990562	0.000133181
Lnc_000214	1.48782	0.0372867	Solyc12g098900.2	-1.13782	2.55e-10	0.991097	0.00011853
Lnc_000216	9.09029	0.0366152	Solyc03g116390.3	-1.44615	6.63e-16	0.990303	0.000140599
Lnc_000216	9.09029	0.0366152	Solyc08g074260.3	2.4228	0.00576915	0.99317	6.98201e-05
Lnc_000216	9.09029	0.0366152	Solyc09g091670.3	1.79324	0.0162704	0.992015	9.53786e-05
Lnc_000218	2.5164	0.0478124	Solyc01g106510.2	1.02524	0.0068502	0.990049	0.000148042
Lnc_000218	2.5164	0.0478124	Solyc04g016230.3	1.31452	0.000282498	0.992885	7.57608e-05
Lnc_000218	2.5164	0.0478124	Solyc08g075550.3	1.42917	8.11e-08	0.990409	0.000137533
Lnc_000218	2.5164	0.0478124	Solyc09g089910.1	1.40003	0.00619283	0.990379	0.000138405
Lnc_000220	1.79723	2.37e-06	Solyc01g005140.3	-1.65287	1.28e-09	0.993752	5.84425e-05
Lnc_000220	1.79723	2.37e-06	Solyc01g008130.3	-1.90874	2.86e-11	0.993281	6.75678e-05
Lnc_000220	1.79723	2.37e-06	Solyc01g008670.3	1.07493	9.47e-05	0.997556	8.95156e-06
Lnc_000220	1.79723	2.37e-06	Solyc01g009860.3	1.18025	1.9e-05	0.998545	3.17489e-06
Lnc_000220	1.79723	2.37e-06	Solyc01g058250.2	-1.8582	6.36e-26	0.994449	4.61267e-05
Lnc_000220	1.79723	2.37e-06	Solyc01g067750.3	-1.52326	6.48e-07	0.992824	7.70645e-05
Lnc_000220	1.79723	2.37e-06	Solyc01g080020.2	1.03355	0.0013518	0.994551	4.44526e-05
Lnc_000220	1.79723	2.37e-06	Solyc01g081060.3	-1.08879	2.37e-06	0.991628	0.000104851
Lnc_000220	1.79723	2.37e-06	Solyc01g088570.3	-1.20222	1.9e-11	-0.991609	0.000105327
Lnc_000220	1.79723	2.37e-06	Solyc01g090560.3	1.26255	3.48e-05	-0.993525	6.27481e-05
Lnc_000220	1.79723	2.37e-06	Solyc01g091030.3	1.26255	3.48e-05	0.996635	1.69638e-05
Lnc_000220	1.79723	2.37e-06	Solyc01g094340.3	1.37546	2.82e-10	0.994477	4.5666e-05
Lnc_000220	1.79723	2.37e-06	Solyc01g094690.3	1.37546	2.82e-10	-0.996794	1.54017e-05
Lnc_000220	1.79723	2.37e-06	Solyc01g095305.1	-1.25542	5.28e-16	0.997608	8.57844e-06
Lnc_000220	1.79723	2.37e-06	Solyc01g095320.3	-1.25542	5.28e-16	0.997608	8.57844e-06
Lnc_000220	1.79723	2.37e-06	Solyc01g097340.3	1.75038	2.01e-08	-0.991783	0.000101013
Lnc_000220	1.79723	2.37e-06	Solyc01g097470.3	1.58851	2.33e-10	0.994622	4.33065e-05
Lnc_000220	1.79723	2.37e-06	Solyc01g097550.3	1.58851	2.33e-10	-0.994468	4.58155e-05
Lnc_000220	1.79723	2.37e-06	Solyc01g098190.3	1.58851	2.33e-10	0.997153	1.21427e-05
Lnc_000220	1.79723	2.37e-06	Solyc01g098500.3	1.58851	2.33e-10	-0.993771	5.8081e-05
Lnc_000220	1.79723	2.37e-06	Solyc01g099405.1	-1.73234	4.66e-10	-0.994684	4.23191e-05
Lnc_000220	1.79723	2.37e-06	Solyc01g099410.3	-1.73234	4.66e-10	-0.994684	4.23191e-05
Lnc_000220	1.79723	2.37e-06	Solyc01g105010.3	-1.05238	1.87e-06	-0.990984	0.000121568
Lnc_000220	1.79723	2.37e-06	Solyc01g105420.3	1.06769	0.000750053	0.994029	5.3373e-05
Lnc_000220	1.79723	2.37e-06	Solyc01g107760.3	1.3976	1.87e-08	0.990305	0.000140541
Lnc_000220	1.79723	2.37e-06	Solyc01g107770.2	1.3976	1.87e-08	0.990305	0.000140541
Lnc_000220	1.79723	2.37e-06	Solyc01g107780.3	1.3976	1.87e-08	0.990305	0.000140541
Lnc_000220	1.79723	2.37e-06	Solyc01g111340.3	-1.12629	8.33e-08	-0.995176	3.48452e-05
Lnc_000220	1.79723	2.37e-06	Solyc01g111350.3	-1.12629	8.33e-08	-0.995176	3.48452e-05
Lnc_000220	1.79723	2.37e-06	Solyc02g071870.3	-1.49494	5.05e-18	0.996282	2.07125e-05
Lnc_000220	1.79723	2.37e-06	Solyc02g071875.1	-1.49494	5.05e-18	0.996282	2.07125e-05
Lnc_000220	1.79723	2.37e-06	Solyc02g072180.3	-1.01469	2.59e-06	-0.994207	5.02401e-05
Lnc_000220	1.79723	2.37e-06	Solyc02g077480.1	3.97473	2.09e-48	-0.996306	2.04455e-05
Lnc_000220	1.79723	2.37e-06	Solyc02g077490.3	-1.6406	9.12e-09	-0.996306	2.04455e-05
Lnc_000220	1.79723	2.37e-06	Solyc02g077510.3	-1.6406	9.12e-09	-0.996306	2.04455e-05
Lnc_000220	1.79723	2.37e-06	Solyc02g077520.3	-1.6406	9.12e-09	-0.996306	2.04455e-05
Lnc_000220	1.79723	2.37e-06	Solyc02g077525.1	-1.6406	9.12e-09	-0.996306	2.04455e-05
Lnc_000220	1.79723	2.37e-06	Solyc02g077530.2	-1.6406	9.12e-09	-0.996306	2.04455e-05
Lnc_000220	1.79723	2.37e-06	Solyc02g078460.3	1.3848	5.9e-08	0.991724	0.000102462
Lnc_000220	1.79723	2.37e-06	Solyc02g080790.3	-2.01596	0.000398827	-0.993611	6.11023e-05
Lnc_000220	1.79723	2.37e-06	Solyc02g082170.2	-2.26548	7.21e-21	-0.996481	1.85495e-05
Lnc_000220	1.79723	2.37e-06	Solyc02g082700.3	-1.44394	2.79e-15	-0.995278	3.33904e-05
Lnc_000220	1.79723	2.37e-06	Solyc02g083760.3	-2.46881	5.11e-23	-0.992641	8.10417e-05
Lnc_000220	1.79723	2.37e-06	Solyc02g086670.3	1.35279	1.29e-07	0.99538	3.19633e-05
Lnc_000220	1.79723	2.37e-06	Solyc02g089160.3	-1.14732	2.9e-09	0.992718	7.93539e-05
Lnc_000220	1.79723	2.37e-06	Solyc02g091430.3	1.09942	0.000184196	0.994011	5.36948e-05
Lnc_000220	1.79723	2.37e-06	Solyc02g092670.1	-1.47618	9.87e-10	-0.990039	0.000148338
Lnc_000220	1.79723	2.37e-06	Solyc02g092680.1	-1.47618	9.87e-10	-0.990039	0.000148338
Lnc_000220	1.79723	2.37e-06	Solyc02g094050.3	2.38706	4.24e-37	-0.991109	0.000118226
Lnc_000220	1.79723	2.37e-06	Solyc03g005210.3	1.49297	1.49e-08	0.996643	1.68856e-05
Lnc_000220	1.79723	2.37e-06	Solyc03g005227.1	1.49297	1.49e-08	-0.990624	0.000131455
Lnc_000220	1.79723	2.37e-06	Solyc03g005520.1	1.89014	6.81e-08	0.994141	5.1389e-05
Lnc_000220	1.79723	2.37e-06	Solyc03g005840.2	-1.34707	1.28e-10	0.997267	1.11936e-05
Lnc_000220	1.79723	2.37e-06	Solyc03g006810.3	-1.193	2.12e-08	-0.995865	2.56175e-05
Lnc_000220	1.79723	2.37e-06	Solyc03g025570.2	-1.17838	2.06e-10	0.990383	0.000138298
Lnc_000220	1.79723	2.37e-06	Solyc03g026370.1	-2.44075	1.93e-24	0.990998	0.000121193
Lnc_000220	1.79723	2.37e-06	Solyc03g031860.3	1.09198	3.45e-06	0.994476	4.56818e-05
Lnc_000220	1.79723	2.37e-06	Solyc03g044460.1	1.28937	7.9e-06	0.994061	5.28112e-05
Lnc_000220	1.79723	2.37e-06	Solyc03g080110.3	1.51378	3.1e-07	0.990372	0.000138588
Lnc_000220	1.79723	2.37e-06	Solyc03g080120.1	1.02527	0.000655514	0.994501	4.5269e-05
Lnc_000220	1.79723	2.37e-06	Solyc03g082560.3	1.05248	0.000213703	0.995342	3.24933e-05
Lnc_000220	1.79723	2.37e-06	Solyc03g090990.1	-2.16187	4.85e-10	-0.991604	0.000105454
Lnc_000220	1.79723	2.37e-06	Solyc03g093650.3	-2.72352	4.04e-35	-0.991261	0.000114232
Lnc_000220	1.79723	2.37e-06	Solyc03g097420.3	-1.20701	1.22e-05	-0.995161	3.50681e-05
Lnc_000220	1.79723	2.37e-06	Solyc03g111310.3	1.02557	0.00200872	0.995103	3.5919e-05
Lnc_000220	1.79723	2.37e-06	Solyc03g111700.3	1.87682	1.22e-17	0.991764	0.000101472
Lnc_000220	1.79723	2.37e-06	Solyc03g115920.3	1.12607	0.0181575	0.993197	6.92615e-05
Lnc_000220	1.79723	2.37e-06	Solyc03g116100.3	-1.44615	6.63e-16	0.993277	6.76375e-05
Lnc_000220	1.79723	2.37e-06	Solyc03g116490.1	1.08286	0.00124573	0.990331	0.000139769
Lnc_000220	1.79723	2.37e-06	Solyc03g117630.1	-3.02206	7.7e-42	0.996726	1.60611e-05
Lnc_000220	1.79723	2.37e-06	Solyc03g122310.3	1.04878	0.00068934	0.996828	1.50797e-05
Lnc_000220	1.79723	2.37e-06	Solyc04g005610.3	2.19867	1.93e-18	0.991928	9.747e-05
Lnc_000220	1.79723	2.37e-06	Solyc04g005810.3	-1.5641	9.26e-08	-0.994675	4.24532e-05
Lnc_000220	1.79723	2.37e-06	Solyc04g007170.3	1.155	8.45e-06	0.994043	5.31211e-05
Lnc_000220	1.79723	2.37e-06	Solyc04g007795.1	-1.01406	1.67e-06	-0.995475	3.06653e-05
Lnc_000220	1.79723	2.37e-06	Solyc04g009465.1	1.30587	2.46e-06	0.994417	4.66621e-05
Lnc_000220	1.79723	2.37e-06	Solyc04g009470.3	1.30587	2.46e-06	0.994417	4.66621e-05
Lnc_000220	1.79723	2.37e-06	Solyc04g011390.1	-1.14139	5.56e-13	-0.997014	1.33583e-05
Lnc_000220	1.79723	2.37e-06	Solyc04g018110.1	3.29278	9.49e-11	-0.992756	7.85162e-05
Lnc_000220	1.79723	2.37e-06	Solyc04g025880.3	1.00379	0.00186317	0.993457	6.40798e-05
Lnc_000220	1.79723	2.37e-06	Solyc04g063350.3	-1.18489	5.58e-09	0.990613	0.000131765
Lnc_000220	1.79723	2.37e-06	Solyc04g064550.1	-1.18489	5.58e-09	0.993693	5.95444e-05
Lnc_000220	1.79723	2.37e-06	Solyc04g076860.3	-1.04208	3.66e-12	0.992607	8.17851e-05
Lnc_000220	1.79723	2.37e-06	Solyc04g077100.3	-1.04208	3.66e-12	0.991839	9.96223e-05
Lnc_000220	1.79723	2.37e-06	Solyc04g077110.3	-1.04208	3.66e-12	0.991839	9.96223e-05
Lnc_000220	1.79723	2.37e-06	Solyc04g078470.3	-1.14505	7.84e-07	-0.990871	0.00012464
Lnc_000220	1.79723	2.37e-06	Solyc04g078800.3	-1.14505	7.84e-07	-0.992943	7.45279e-05
Lnc_000220	1.79723	2.37e-06	Solyc04g080300.3	1.05899	0.00120108	0.993251	6.81657e-05
Lnc_000220	1.79723	2.37e-06	Solyc04g082420.3	1.2273	1.37e-05	0.99569	2.78304e-05
Lnc_000220	1.79723	2.37e-06	Solyc04g082540.2	-1.48235	1.68e-09	0.99125	0.000114507
Lnc_000220	1.79723	2.37e-06	Solyc04g082830.3	-1.48235	1.68e-09	0.997368	1.03796e-05
Lnc_000220	1.79723	2.37e-06	Solyc05g007060.3	-1.29709	1.99e-11	0.994202	5.03227e-05
Lnc_000220	1.79723	2.37e-06	Solyc05g007580.1	-1.56198	4.46e-09	0.992927	7.48644e-05
Lnc_000220	1.79723	2.37e-06	Solyc05g007770.3	1.68573	2.13e-12	0.997237	1.14448e-05
Lnc_000220	1.79723	2.37e-06	Solyc05g007900.2	1.68573	2.13e-12	0.995153	3.5177e-05
Lnc_000220	1.79723	2.37e-06	Solyc05g008310.3	-2.806	1.89e-16	0.990737	0.000128304
Lnc_000220	1.79723	2.37e-06	Solyc05g013650.2	2.02761	6.31e-36	-0.994068	5.26848e-05
Lnc_000220	1.79723	2.37e-06	Solyc05g014370.3	4.21093	8.96e-37	-0.991547	0.000106887
Lnc_000220	1.79723	2.37e-06	Solyc05g015610.3	1.02362	0.00183801	0.992466	8.49236e-05
Lnc_000220	1.79723	2.37e-06	Solyc05g015613.1	1.02362	0.00183801	0.992466	8.49236e-05
Lnc_000220	1.79723	2.37e-06	Solyc05g041540.3	1.48677	2.6e-09	0.994919	3.86541e-05
Lnc_000220	1.79723	2.37e-06	Solyc05g051215.1	1.78999	4.09e-12	0.994276	4.90473e-05
Lnc_000220	1.79723	2.37e-06	Solyc05g053760.3	1.4207	1.86e-05	0.997077	1.2804e-05
Lnc_000220	1.79723	2.37e-06	Solyc05g054360.3	1.19736	9.4e-06	0.992489	8.44208e-05
Lnc_000220	1.79723	2.37e-06	Solyc05g054610.1	-1.46718	8.35e-09	-0.99868	2.61199e-06
Lnc_000220	1.79723	2.37e-06	Solyc05g055550.3	1.1797	9.32e-06	0.993874	5.61748e-05
Lnc_000220	1.79723	2.37e-06	Solyc06g019200.3	1.03555	0.00225868	0.990735	0.000128357
Lnc_000220	1.79723	2.37e-06	Solyc06g033850.3	1.40456	1.5e-07	0.9976	8.6355e-06
Lnc_000220	1.79723	2.37e-06	Solyc06g053840.3	1.35676	3.55e-07	0.993691	5.95844e-05
Lnc_000220	1.79723	2.37e-06	Solyc06g054540.3	-1.1815	1.12e-06	0.991438	0.000109654
Lnc_000220	1.79723	2.37e-06	Solyc06g059860.3	1.52537	1.42e-09	0.993214	6.89269e-05
Lnc_000220	1.79723	2.37e-06	Solyc06g067860.3	-3.37155	5.67e-23	-0.990305	0.000140537
Lnc_000220	1.79723	2.37e-06	Solyc06g067870.3	-3.37155	5.67e-23	-0.992001	9.57108e-05
Lnc_000220	1.79723	2.37e-06	Solyc06g069760.3	-1.69649	1.04e-13	0.995917	2.4973e-05
Lnc_000220	1.79723	2.37e-06	Solyc06g072240.1	3.9949	2.11e-73	-0.991858	9.91796e-05
Lnc_000220	1.79723	2.37e-06	Solyc06g073220.1	-1.67171	7.9e-10	-0.994507	4.51796e-05
Lnc_000220	1.79723	2.37e-06	Solyc06g074790.1	-1.87258	6.75e-10	-0.994564	4.42474e-05
Lnc_000220	1.79723	2.37e-06	Solyc06g075800.1	-1.48651	1.6e-14	-0.996494	1.84153e-05
Lnc_000220	1.79723	2.37e-06	Solyc06g084430.3	-2.35825	1.69e-20	-0.991801	0.000100553
Lnc_000220	1.79723	2.37e-06	Solyc07g006120.3	1.08513	0.000131933	0.997966	6.20165e-06
Lnc_000220	1.79723	2.37e-06	Solyc07g006130.2	1.08513	0.000131933	0.997966	6.20165e-06
Lnc_000220	1.79723	2.37e-06	Solyc07g006800.1	2.1468	2.56e-14	0.997616	8.51928e-06
Lnc_000220	1.79723	2.37e-06	Solyc07g007930.3	4.25527	1.38e-63	0.997281	1.10778e-05
Lnc_000220	1.79723	2.37e-06	Solyc07g009440.2	1.16258	0.00034851	0.995563	2.94931e-05
Lnc_000220	1.79723	2.37e-06	Solyc07g017510.3	-1.48793	7.27e-14	0.99856	3.10936e-06
Lnc_000220	1.79723	2.37e-06	Solyc07g021625.1	2.20933	3.43e-23	0.992972	7.39062e-05
Lnc_000220	1.79723	2.37e-06	Solyc07g021630.3	2.20933	3.43e-23	0.992972	7.39062e-05
Lnc_000220	1.79723	2.37e-06	Solyc07g026675.1	1.22471	4.55e-06	0.992388	8.67042e-05
Lnc_000220	1.79723	2.37e-06	Solyc07g026680.2	1.22471	4.55e-06	0.992388	8.67042e-05
Lnc_000220	1.79723	2.37e-06	Solyc07g041830.3	-2.34911	1.09e-19	0.994344	4.78999e-05
Lnc_000220	1.79723	2.37e-06	Solyc07g053480.3	-1.12411	0.00229492	-0.994424	4.65504e-05
Lnc_000220	1.79723	2.37e-06	Solyc07g053490.3	1.11052	7.26e-05	0.997964	6.21567e-06
Lnc_000220	1.79723	2.37e-06	Solyc07g053495.1	1.11052	7.26e-05	0.997964	6.21567e-06
Lnc_000220	1.79723	2.37e-06	Solyc07g053520.2	1.11052	7.26e-05	0.997964	6.21567e-06
Lnc_000220	1.79723	2.37e-06	Solyc07g053525.1	1.11052	7.26e-05	0.997964	6.21567e-06
Lnc_000220	1.79723	2.37e-06	Solyc07g054080.2	-1.69366	8.09e-14	0.995175	3.48695e-05
Lnc_000220	1.79723	2.37e-06	Solyc07g056340.3	1.23501	1.58e-05	0.993959	5.46261e-05
Lnc_000220	1.79723	2.37e-06	Solyc07g056420.4	2.66083	3.65e-35	0.998726	2.43524e-06
Lnc_000220	1.79723	2.37e-06	Solyc07g061730.3	5.30199	2.95e-98	0.993987	5.41326e-05
Lnc_000220	1.79723	2.37e-06	Solyc07g062480.1	2.3671	6e-19	0.990281	0.00014124
Lnc_000220	1.79723	2.37e-06	Solyc07g063930.3	1.22485	2.28e-05	0.995536	2.98467e-05
Lnc_000220	1.79723	2.37e-06	Solyc08g061270.1	-1.27761	5.93e-13	0.991538	0.000107097
Lnc_000220	1.79723	2.37e-06	Solyc08g067410.2	1.0924	0.000254125	0.996335	2.01283e-05
Lnc_000220	1.79723	2.37e-06	Solyc08g068150.3	1.65348	9.16e-06	0.994766	4.10196e-05
Lnc_000220	1.79723	2.37e-06	Solyc08g075020.3	1.46551	1.17e-10	0.991925	9.75502e-05
Lnc_000220	1.79723	2.37e-06	Solyc08g075280.3	1.42917	8.11e-08	0.995506	3.02486e-05
Lnc_000220	1.79723	2.37e-06	Solyc08g077230.3	1.66156	1.5e-08	0.996805	1.52945e-05
Lnc_000220	1.79723	2.37e-06	Solyc08g078310.3	1.1535	1.57e-05	0.991915	9.77789e-05
Lnc_000220	1.79723	2.37e-06	Solyc08g080640.2	2.4237	1.86e-19	0.995375	3.20363e-05
Lnc_000220	1.79723	2.37e-06	Solyc08g080650.3	2.4237	1.86e-19	0.995375	3.20363e-05
Lnc_000220	1.79723	2.37e-06	Solyc08g080890.3	-1.33559	4.12e-10	-0.994916	3.87026e-05
Lnc_000220	1.79723	2.37e-06	Solyc09g005610.3	-1.10761	4.27e-08	0.99282	7.71421e-05
Lnc_000220	1.79723	2.37e-06	Solyc09g007860.3	1.05758	0.00189623	0.99186	9.91268e-05
Lnc_000220	1.79723	2.37e-06	Solyc09g008820.3	-1.07984	5.32e-07	0.999057	1.33247e-06
Lnc_000220	1.79723	2.37e-06	Solyc09g009130.3	-1.31294	1.41e-11	0.993104	7.11599e-05
Lnc_000220	1.79723	2.37e-06	Solyc09g009985.1	1.06369	2.14e-07	0.994574	4.40904e-05
Lnc_000220	1.79723	2.37e-06	Solyc09g010000.3	1.06369	2.14e-07	0.994574	4.40904e-05
Lnc_000220	1.79723	2.37e-06	Solyc09g010010.1	1.06369	2.14e-07	0.994574	4.40904e-05
Lnc_000220	1.79723	2.37e-06	Solyc09g011630.3	1.13215	7.9e-05	0.995039	3.68607e-05
Lnc_000220	1.79723	2.37e-06	Solyc09g014870.1	-1.05727	3.68e-05	-0.993191	6.93879e-05
Lnc_000220	1.79723	2.37e-06	Solyc09g061280.3	-1.47744	9.24e-10	0.997457	9.69315e-06
Lnc_000220	1.79723	2.37e-06	Solyc09g063130.3	1.38434	1.38e-10	0.997313	1.08197e-05
Lnc_000220	1.79723	2.37e-06	Solyc09g065020.3	1.51188	1.03e-07	0.990246	0.000142237
Lnc_000220	1.79723	2.37e-06	Solyc09g065390.1	1.51188	1.03e-07	0.99927	7.9977e-07
Lnc_000220	1.79723	2.37e-06	Solyc09g074300.1	-1.73545	0.000611683	-0.997004	1.34516e-05
Lnc_000220	1.79723	2.37e-06	Solyc09g075610.3	-1.67155	1.28e-12	0.997526	9.17036e-06
Lnc_000220	1.79723	2.37e-06	Solyc09g082110.3	-1.15081	9.9e-13	0.995501	3.03189e-05
Lnc_000220	1.79723	2.37e-06	Solyc09g082120.3	-1.15081	9.9e-13	0.995501	3.03189e-05
Lnc_000220	1.79723	2.37e-06	Solyc09g082600.2	1.94607	4.69e-09	0.992417	8.60386e-05
Lnc_000220	1.79723	2.37e-06	Solyc09g089550.3	1.62594	0.000153181	0.990061	0.000147696
Lnc_000220	1.79723	2.37e-06	Solyc09g090430.3	-1.0371	2.78e-08	0.99446	4.59597e-05
Lnc_000220	1.79723	2.37e-06	Solyc09g092640.3	-1.02909	2.95e-07	0.995045	3.67647e-05
Lnc_000220	1.79723	2.37e-06	Solyc10g005550.2	3.18102	4.26e-53	0.997072	1.28495e-05
Lnc_000220	1.79723	2.37e-06	Solyc10g005880.3	1.55718	5.76e-11	0.997588	8.72076e-06
Lnc_000220	1.79723	2.37e-06	Solyc10g007103.1	-1.95547	3.86e-11	0.990739	0.000128253
Lnc_000220	1.79723	2.37e-06	Solyc10g008470.3	1.1184	3.52e-06	0.995418	3.14415e-05
Lnc_000220	1.79723	2.37e-06	Solyc10g009290.1	-1.0371	1.6e-07	-0.994347	4.78396e-05
Lnc_000220	1.79723	2.37e-06	Solyc10g044967.1	1.29547	1.38e-08	0.996517	1.81767e-05
Lnc_000220	1.79723	2.37e-06	Solyc10g074890.2	1.00722	0.00160567	0.990007	0.000149284
Lnc_000220	1.79723	2.37e-06	Solyc10g079630.1	-1.16234	2.84e-06	-0.996634	1.69718e-05
Lnc_000220	1.79723	2.37e-06	Solyc10g084240.2	-1.23371	6.2e-09	0.990956	0.000122333
Lnc_000220	1.79723	2.37e-06	Solyc10g085030.1	-1.40789	6.3e-11	0.997402	1.01167e-05
Lnc_000220	1.79723	2.37e-06	Solyc10g085040.1	-1.40789	6.3e-11	0.997402	1.01167e-05
Lnc_000220	1.79723	2.37e-06	Solyc11g006570.2	1.23664	1.95e-06	0.994353	4.77403e-05
Lnc_000220	1.79723	2.37e-06	Solyc11g007370.2	1.72774	1.97e-13	0.997165	1.20418e-05
Lnc_000220	1.79723	2.37e-06	Solyc11g007390.1	1.72774	1.97e-13	0.997165	1.20418e-05
Lnc_000220	1.79723	2.37e-06	Solyc11g007460.1	1.72774	1.97e-13	0.997165	1.20418e-05
Lnc_000220	1.79723	2.37e-06	Solyc11g065190.2	-1.89012	1.89e-10	-0.99425	4.95018e-05
Lnc_000220	1.79723	2.37e-06	Solyc11g071200.2	1.184	6.47e-07	0.995334	3.26042e-05
Lnc_000220	1.79723	2.37e-06	Solyc11g071205.1	1.184	6.47e-07	0.995334	3.26042e-05
Lnc_000220	1.79723	2.37e-06	Solyc11g071210.2	1.184	6.47e-07	0.995334	3.26042e-05
Lnc_000220	1.79723	2.37e-06	Solyc11g072470.2	1.32809	2.89e-06	0.997049	1.30519e-05
Lnc_000220	1.79723	2.37e-06	Solyc12g008840.2	1.55973	2.34e-09	0.994664	4.26392e-05
Lnc_000220	1.79723	2.37e-06	Solyc12g010740.2	1.17299	7.54e-06	0.998434	3.67849e-06
Lnc_000220	1.79723	2.37e-06	Solyc12g010745.1	1.17299	7.54e-06	0.998434	3.67849e-06
Lnc_000220	1.79723	2.37e-06	Solyc12g010750.2	1.17299	7.54e-06	0.998434	3.67849e-06
Lnc_000220	1.79723	2.37e-06	Solyc12g013680.2	-1.51588	6.31e-13	0.997954	6.27444e-06
Lnc_000220	1.79723	2.37e-06	Solyc12g014100.2	1.57397	2.88e-10	0.9955	3.0325e-05
Lnc_000220	1.79723	2.37e-06	Solyc12g014140.2	1.57397	2.88e-10	-0.991734	0.000102205
Lnc_000220	1.79723	2.37e-06	Solyc12g017850.2	1.75969	9.18e-16	0.995744	2.71367e-05
[truncated: 20,264 more rows]

## Sheet: Table S6-2
lncRNA ID	FoldChange	P-value	target gene ID	FoldChange	P-value	Correlation	P-value
Lnc_000003	-6.43727	1.27e-05	Solyc01g007170.3	-1.03346	2.76e-11	0.993723	5.89697e-05
Lnc_000003	-6.43727	1.27e-05	Solyc01g066740.3	-1.39929	1.86e-15	0.995568	2.94254e-05
Lnc_000003	-6.43727	1.27e-05	Solyc01g066900.3	-1.30841	8.07e-13	0.996137	2.23608e-05
Lnc_000003	-6.43727	1.27e-05	Solyc01g068130.3	-2.70185	1.87e-23	0.998535	3.21626e-06
Lnc_000003	-6.43727	1.27e-05	Solyc01g068420.3	-1.01282	3.01e-07	0.99185	9.93538e-05
Lnc_000003	-6.43727	1.27e-05	Solyc01g079790.3	-1.34829	2.1e-11	0.999142	1.10462e-06
Lnc_000003	-6.43727	1.27e-05	Solyc01g080900.3	-1.76942	5.05e-17	0.997123	1.24079e-05
Lnc_000003	-6.43727	1.27e-05	Solyc01g095450.3	-2.58519	3.24e-22	0.993199	6.92199e-05
Lnc_000003	-6.43727	1.27e-05	Solyc01g098720.3	-1.85437	8.39e-09	0.993575	6.17931e-05
Lnc_000003	-6.43727	1.27e-05	Solyc01g104230.3	-2.38911	8.92e-28	0.990409	0.000137542
Lnc_000003	-6.43727	1.27e-05	Solyc01g105030.3	-1.00253	6.47e-08	0.999201	9.56345e-07
Lnc_000003	-6.43727	1.27e-05	Solyc01g105050.3	-1.00253	6.47e-08	0.999201	9.56345e-07
Lnc_000003	-6.43727	1.27e-05	Solyc02g020940.3	-1.58906	6.68e-17	0.993758	5.83218e-05
Lnc_000003	-6.43727	1.27e-05	Solyc02g065390.1	-1.21194	3.23e-12	0.996186	2.17894e-05
Lnc_000003	-6.43727	1.27e-05	Solyc02g065400.3	-1.21194	3.23e-12	0.996186	2.17894e-05
Lnc_000003	-6.43727	1.27e-05	Solyc02g068070.3	-2.09311	8.88e-14	0.997403	1.01116e-05
Lnc_000003	-6.43727	1.27e-05	Solyc02g072160.3	-1.06818	8.55e-10	0.995733	2.72733e-05
Lnc_000003	-6.43727	1.27e-05	Solyc02g077110.3	-1.33702	5.69e-14	0.990868	0.000124698
Lnc_000003	-6.43727	1.27e-05	Solyc02g079950.3	-1.16991	2.89e-09	0.999458	4.40801e-07
Lnc_000003	-6.43727	1.27e-05	Solyc02g080160.3	-2.17082	2.29e-23	0.992644	8.09738e-05
Lnc_000003	-6.43727	1.27e-05	Solyc02g081270.3	-1.38327	2.08e-09	0.993336	6.64631e-05
Lnc_000003	-6.43727	1.27e-05	Solyc02g083690.2	-1.09004	2.76e-12	0.990136	0.000145467
Lnc_000003	-6.43727	1.27e-05	Solyc02g083700.3	-1.09004	2.76e-12	0.990136	0.000145467
Lnc_000003	-6.43727	1.27e-05	Solyc02g083810.3	-1.75526	3.2e-19	0.993899	5.57147e-05
Lnc_000003	-6.43727	1.27e-05	Solyc02g084640.3	-2.02496	1.37e-21	0.995196	3.45593e-05
Lnc_000003	-6.43727	1.27e-05	Solyc02g087970.1	-1.58539	7.05e-11	0.997593	8.68131e-06
Lnc_000003	-6.43727	1.27e-05	Solyc02g088100.3	-2.28072	3.43e-22	0.997365	1.04035e-05
Lnc_000003	-6.43727	1.27e-05	Solyc02g090100.1	-1.64842	9.52e-07	0.993811	5.7334e-05
Lnc_000003	-6.43727	1.27e-05	Solyc02g091680.3	-1.14446	1.22e-12	0.990087	0.000146926
Lnc_000003	-6.43727	1.27e-05	Solyc02g091690.3	-2.71701	7.67e-15	0.991424	0.000110017
Lnc_000003	-6.43727	1.27e-05	Solyc02g092950.3	-2.07258	1.33e-19	0.992923	7.49478e-05
Lnc_000003	-6.43727	1.27e-05	Solyc02g092960.1	-2.07258	1.33e-19	0.992923	7.49478e-05
Lnc_000003	-6.43727	1.27e-05	Solyc02g092980.3	-1.22939	5.04e-13	0.994279	4.90052e-05
Lnc_000003	-6.43727	1.27e-05	Solyc03g006050.3	-1.0387	5.42e-09	0.998256	4.55993e-06
Lnc_000003	-6.43727	1.27e-05	Solyc03g007060.3	-1.25612	6.29e-11	0.998747	2.35555e-06
Lnc_000003	-6.43727	1.27e-05	Solyc03g007200.2	-1.48642	2.87e-11	0.999034	1.40016e-06
Lnc_000003	-6.43727	1.27e-05	Solyc03g026260.3	-1.84972	5.44e-26	0.990329	0.000139831
Lnc_000003	-6.43727	1.27e-05	Solyc03g031860.3	-1.25896	3.05e-07	0.990692	0.000129548
Lnc_000003	-6.43727	1.27e-05	Solyc03g033660.3	-1.31318	7.35e-08	0.991323	0.000112606
Lnc_000003	-6.43727	1.27e-05	Solyc03g083730.1	-1.88594	6.83e-15	0.998585	3.00172e-06
Lnc_000003	-6.43727	1.27e-05	Solyc03g083770.1	-1.68199	1.25e-08	0.997378	1.03059e-05
Lnc_000003	-6.43727	1.27e-05	Solyc03g114450.3	-1.02637	3.08e-09	0.997728	7.73702e-06
Lnc_000003	-6.43727	1.27e-05	Solyc03g115980.1	-1.30115	8.58e-13	0.996842	1.49475e-05
Lnc_000003	-6.43727	1.27e-05	Solyc03g116870.3	-1.52519	5.77e-15	0.991442	0.000109555
Lnc_000003	-6.43727	1.27e-05	Solyc03g119080.4	-1.41859	5.61e-08	0.991913	9.78316e-05
Lnc_000003	-6.43727	1.27e-05	Solyc04g006930.3	-1.01603	5.44e-10	0.993383	6.55283e-05
Lnc_000003	-6.43727	1.27e-05	Solyc04g009020.3	-1.29046	3.5e-08	0.997588	8.71631e-06
Lnc_000003	-6.43727	1.27e-05	Solyc04g009030.3	-1.53692	4.67e-16	0.994621	4.3325e-05
Lnc_000003	-6.43727	1.27e-05	Solyc04g017720.3	-1.0551	9.23e-09	0.996695	1.63632e-05
Lnc_000003	-6.43727	1.27e-05	Solyc04g040160.3	-1.69418	4.54e-12	0.996027	2.3641e-05
Lnc_000003	-6.43727	1.27e-05	Solyc04g050440.3	-3.0251	5.36e-36	0.995507	3.02349e-05
Lnc_000003	-6.43727	1.27e-05	Solyc04g050930.3	-1.82484	4.22e-12	0.996891	1.44867e-05
Lnc_000003	-6.43727	1.27e-05	Solyc04g063210.3	-1.88503	2.72e-18	0.997019	1.33138e-05
Lnc_000003	-6.43727	1.27e-05	Solyc04g063240.3	-1.80276	1.86e-14	0.991128	0.000117712
Lnc_000003	-6.43727	1.27e-05	Solyc04g078470.3	-2.28455	1.14e-17	0.998709	2.4972e-06
Lnc_000003	-6.43727	1.27e-05	Solyc05g005480.2	-1.31689	3.01e-11	0.99674	1.59204e-05
Lnc_000003	-6.43727	1.27e-05	Solyc05g007090.3	-1.05329	1.59e-06	0.994184	5.06365e-05
Lnc_000003	-6.43727	1.27e-05	Solyc05g007830.3	-3.52625	2.88e-19	0.999573	2.73932e-07
Lnc_000003	-6.43727	1.27e-05	Solyc05g009570.3	-2.05602	2.15e-08	0.992013	9.54352e-05
Lnc_000003	-6.43727	1.27e-05	Solyc05g012680.3	-1.29552	1.05e-13	0.991007	0.000120939
Lnc_000003	-6.43727	1.27e-05	Solyc05g013510.3	-1.50996	1.2e-12	0.998571	3.06192e-06
Lnc_000003	-6.43727	1.27e-05	Solyc05g013690.3	-1.62002	8.87e-12	0.998563	3.09805e-06
Lnc_000003	-6.43727	1.27e-05	Solyc05g025600.1	-1.02978	3.26e-08	0.999129	1.13853e-06
Lnc_000003	-6.43727	1.27e-05	Solyc05g050110.3	-1.13339	2.65e-07	0.997515	9.25656e-06
Lnc_000003	-6.43727	1.27e-05	Solyc06g007890.3	-1.01234	5.25e-07	0.997968	6.19081e-06
Lnc_000003	-6.43727	1.27e-05	Solyc06g007910.3	-1.01234	5.25e-07	0.997968	6.19081e-06
Lnc_000003	-6.43727	1.27e-05	Solyc06g060340.3	-1.88164	3.96e-19	0.992343	8.77272e-05
Lnc_000003	-6.43727	1.27e-05	Solyc06g066820.3	-2.11285	1.53e-32	0.994338	4.79941e-05
Lnc_000003	-6.43727	1.27e-05	Solyc06g073760.3	-1.04187	1.94e-08	0.995347	3.24208e-05
Lnc_000003	-6.43727	1.27e-05	Solyc06g074190.3	-1.62683	2.57e-15	0.99818	4.96424e-06
Lnc_000003	-6.43727	1.27e-05	Solyc06g074200.3	-1.62683	2.57e-15	0.99818	4.96424e-06
Lnc_000003	-6.43727	1.27e-05	Solyc06g084470.3	-1.23212	3.89e-06	0.99148	0.000108578
Lnc_000003	-6.43727	1.27e-05	Solyc07g005190.3	-1.60656	3.72e-09	0.997124	1.23989e-05
Lnc_000003	-6.43727	1.27e-05	Solyc07g005390.3	-1.20553	5.74e-13	0.993919	5.53587e-05
Lnc_000003	-6.43727	1.27e-05	Solyc07g032380.3	-1.29342	1.5e-13	0.993903	5.56467e-05
Lnc_000003	-6.43727	1.27e-05	Solyc07g032385.1	-1.29342	1.5e-13	0.993903	5.56467e-05
Lnc_000003	-6.43727	1.27e-05	Solyc07g043000.3	-2.77606	1.49e-24	0.999137	1.11712e-06
Lnc_000003	-6.43727	1.27e-05	Solyc07g044860.3	-1.26941	4.34e-15	0.992164	9.18589e-05
Lnc_000003	-6.43727	1.27e-05	Solyc07g061790.3	-1.20974	2.64e-06	0.99081	0.000126308
Lnc_000003	-6.43727	1.27e-05	Solyc07g062545.1	-1.32086	3.56e-12	0.998598	2.94684e-06
Lnc_000003	-6.43727	1.27e-05	Solyc07g062550.3	-1.32086	3.56e-12	0.998598	2.94684e-06
Lnc_000003	-6.43727	1.27e-05	Solyc07g063720.1	-1.15638	1.47e-07	0.991477	0.000108656
Lnc_000003	-6.43727	1.27e-05	Solyc07g063730.2	-1.15638	1.47e-07	0.991477	0.000108656
Lnc_000003	-6.43727	1.27e-05	Solyc07g064500.3	-1.47799	2.45e-13	0.997594	8.67583e-06
Lnc_000003	-6.43727	1.27e-05	Solyc08g007060.3	-1.48814	8.78e-15	0.997758	7.53351e-06
Lnc_000003	-6.43727	1.27e-05	Solyc08g007130.3	-1.95452	6.41e-18	0.997391	1.02007e-05
Lnc_000003	-6.43727	1.27e-05	Solyc08g008630.3	-1.1728	5.34e-08	0.995089	3.61159e-05
Lnc_000003	-6.43727	1.27e-05	Solyc08g068230.3	-1.02326	1.79e-09	0.995717	2.74819e-05
Lnc_000003	-6.43727	1.27e-05	Solyc08g074480.1	-3.19365	1.29e-14	0.998826	2.06529e-06
Lnc_000003	-6.43727	1.27e-05	Solyc08g077110.3	-2.50794	3.37e-09	0.996683	1.64807e-05
Lnc_000003	-6.43727	1.27e-05	Solyc08g078870.2	-2.46848	3.69e-10	0.997592	8.68784e-06
Lnc_000003	-6.43727	1.27e-05	Solyc08g079180.3	-1.05892	1.62e-06	0.993847	5.66713e-05
Lnc_000003	-6.43727	1.27e-05	Solyc08g079240.3	-1.12591	2.17e-06	0.998757	2.31633e-06
Lnc_000003	-6.43727	1.27e-05	Solyc08g079270.3	1.06168	0.000210417	-0.992973	7.38919e-05
Lnc_000003	-6.43727	1.27e-05	Solyc08g080050.3	-1.20953	3.86e-08	0.994848	3.97506e-05
Lnc_000003	-6.43727	1.27e-05	Solyc08g083210.3	-1.83595	7.06e-13	0.997457	9.69144e-06
Lnc_000003	-6.43727	1.27e-05	Solyc08g083215.1	-1.83595	7.06e-13	0.997457	9.69144e-06
Lnc_000003	-6.43727	1.27e-05	Solyc09g010220.3	-1.38349	3.58e-13	0.990883	0.000124304
Lnc_000003	-6.43727	1.27e-05	Solyc09g015890.3	-1.03707	7.1e-06	0.993565	6.1979e-05
Lnc_000003	-6.43727	1.27e-05	Solyc09g059170.2	-3.64325	1.25e-41	0.997458	9.68228e-06
Lnc_000003	-6.43727	1.27e-05	Solyc09g064500.3	-1.34827	3.16e-07	0.992072	9.40409e-05
Lnc_000003	-6.43727	1.27e-05	Solyc09g075350.3	-2.61926	2.6e-33	0.992112	9.30858e-05
Lnc_000003	-6.43727	1.27e-05	Solyc09g075960.1	-1.11565	1.33e-10	0.99006	0.00014772
Lnc_000003	-6.43727	1.27e-05	Solyc09g090570.2	-1.2075	4.89e-06	0.992405	8.62991e-05
Lnc_000003	-6.43727	1.27e-05	Solyc09g092580.3	-1.46592	2.22e-17	0.992257	8.96946e-05
Lnc_000003	-6.43727	1.27e-05	Solyc09g092620.3	-1.46592	2.22e-17	0.992257	8.96946e-05
Lnc_000003	-6.43727	1.27e-05	Solyc09g097770.3	-2.54333	9.89e-36	0.990798	0.000126638
Lnc_000003	-6.43727	1.27e-05	Solyc10g005050.3	-2.25749	2.58e-18	0.99408	5.24661e-05
Lnc_000003	-6.43727	1.27e-05	Solyc10g005620.3	-1.42087	2.77e-10	0.996984	1.36325e-05
Lnc_000003	-6.43727	1.27e-05	Solyc10g007690.3	-1.08576	5.17e-08	0.998646	2.74919e-06
Lnc_000003	-6.43727	1.27e-05	Solyc10g008980.3	-1.33869	5.25e-16	0.991356	0.000111751
Lnc_000003	-6.43727	1.27e-05	Solyc10g018300.2	-1.27006	6.12e-08	0.995248	3.38144e-05
Lnc_000003	-6.43727	1.27e-05	Solyc10g044520.2	-1.18433	1e-10	0.999248	8.47225e-07
Lnc_000003	-6.43727	1.27e-05	Solyc10g050110.1	-2.38857	1.13e-21	0.997859	6.87198e-06
Lnc_000003	-6.43727	1.27e-05	Solyc10g055390.2	-1.11568	1.6e-06	0.99376	5.82933e-05
Lnc_000003	-6.43727	1.27e-05	Solyc10g074830.1	-2.7052	4.37e-23	0.997451	9.73452e-06
Lnc_000003	-6.43727	1.27e-05	Solyc10g079590.1	-1.00397	4.14e-09	0.991992	9.59422e-05
Lnc_000003	-6.43727	1.27e-05	Solyc11g011210.2	-3.14548	1.96e-38	0.996391	1.9519e-05
Lnc_000003	-6.43727	1.27e-05	Solyc11g021160.1	-1.23806	7e-12	0.997632	8.40433e-06
Lnc_000003	-6.43727	1.27e-05	Solyc11g066660.2	-1.04347	1.65e-10	0.995301	3.30655e-05
Lnc_000003	-6.43727	1.27e-05	Solyc11g066665.1	-1.04347	1.65e-10	0.995301	3.30655e-05
Lnc_000003	-6.43727	1.27e-05	Solyc11g066940.2	-1.93474	2.25e-14	0.996834	1.50212e-05
Lnc_000003	-6.43727	1.27e-05	Solyc11g066950.2	-3.9409	1.96e-35	0.999035	1.39713e-06
Lnc_000003	-6.43727	1.27e-05	Solyc11g072110.2	-1.39925	4.38e-10	0.998772	2.2604e-06
Lnc_000003	-6.43727	1.27e-05	Solyc11g073130.2	-1.93036	4.69e-22	0.990427	0.000137025
Lnc_000003	-6.43727	1.27e-05	Solyc12g005240.1	-1.17038	1.15e-08	0.998047	5.71666e-06
Lnc_000003	-6.43727	1.27e-05	Solyc12g005630.2	-1.3757	4.95e-09	0.99692	1.4217e-05
Lnc_000003	-6.43727	1.27e-05	Solyc12g006570.2	-1.27416	2.33e-10	0.996789	1.54519e-05
Lnc_000003	-6.43727	1.27e-05	Solyc12g008980.2	-1.24327	1.23e-07	0.993611	6.11023e-05
Lnc_000003	-6.43727	1.27e-05	Solyc12g009820.2	-1.56343	1e-13	0.992321	8.82334e-05
Lnc_000003	-6.43727	1.27e-05	Solyc12g010320.2	-1.53274	1.1e-09	0.998088	5.4798e-06
Lnc_000003	-6.43727	1.27e-05	Solyc12g014395.1	-1.06233	1.36e-06	0.992512	8.38977e-05
Lnc_000003	-6.43727	1.27e-05	Solyc12g014500.2	-1.36616	1.29e-11	0.997573	8.82828e-06
Lnc_000003	-6.43727	1.27e-05	Solyc12g019550.2	-1.33983	3.33e-10	0.999128	1.13933e-06
Lnc_000003	-6.43727	1.27e-05	Solyc12g055970.2	-3.10698	1.17e-11	0.997209	1.16723e-05
Lnc_000003	-6.43727	1.27e-05	Solyc12g056390.1	-1.25303	5.72e-12	0.998313	4.26881e-06
Lnc_000003	-6.43727	1.27e-05	Solyc12g094530.1	-1.3927	1.48e-07	0.991186	0.000116197
Lnc_000003	-6.43727	1.27e-05	Solyc12g096900.2	-1.72643	6.13e-13	0.99972	1.17564e-07
Lnc_000007	-4.11564	0.000769408	Solyc00g013150.1	-1.99157	1.44e-06	0.997155	1.21289e-05
Lnc_000007	-4.11564	0.000769408	Solyc00g023710.1	-1.00564	5.58e-06	0.995181	3.47787e-05
Lnc_000007	-4.11564	0.000769408	Solyc00g069880.2	-1.08627	9.24e-06	0.993441	6.43829e-05
Lnc_000007	-4.11564	0.000769408	Solyc01g068130.3	-2.70185	1.87e-23	0.995445	3.10736e-05
Lnc_000007	-4.11564	0.000769408	Solyc01g079790.3	-1.34829	2.1e-11	0.992545	8.31586e-05
Lnc_000007	-4.11564	0.000769408	Solyc01g095450.3	-2.58519	3.24e-22	0.994995	3.75121e-05
Lnc_000007	-4.11564	0.000769408	Solyc01g098720.3	-1.85437	8.39e-09	0.995588	2.91497e-05
Lnc_000007	-4.11564	0.000769408	Solyc01g105030.3	-1.00253	6.47e-08	0.996573	1.75922e-05
Lnc_000007	-4.11564	0.000769408	Solyc01g105050.3	-1.00253	6.47e-08	0.996573	1.75922e-05
Lnc_000007	-4.11564	0.000769408	Solyc02g063380.1	-1.8234	1.18e-05	0.993255	6.80975e-05
Lnc_000007	-4.11564	0.000769408	Solyc02g065470.1	-2.25259	4.66e-06	0.994048	5.30363e-05
Lnc_000007	-4.11564	0.000769408	Solyc02g068070.3	-2.09311	8.88e-14	0.998688	2.57944e-06
Lnc_000007	-4.11564	0.000769408	Solyc02g079950.3	-1.16991	2.89e-09	0.995816	2.62249e-05
Lnc_000007	-4.11564	0.000769408	Solyc02g081270.3	-1.38327	2.08e-09	0.996561	1.77165e-05
Lnc_000007	-4.11564	0.000769408	Solyc02g087970.1	-1.58539	7.05e-11	0.990997	0.000121203
Lnc_000007	-4.11564	0.000769408	Solyc02g088100.3	-2.28072	3.43e-22	0.990677	0.000129962
Lnc_000007	-4.11564	0.000769408	Solyc02g090100.1	-1.64842	9.52e-07	0.99099	0.000121413
Lnc_000007	-4.11564	0.000769408	Solyc02g091690.3	-2.71701	7.67e-15	0.998259	4.54658e-06
Lnc_000007	-4.11564	0.000769408	Solyc02g094330.3	-1.78293	1.62e-05	0.99183	9.98602e-05
Lnc_000007	-4.11564	0.000769408	Solyc03g007060.3	-1.25612	6.29e-11	0.991605	0.000105407
Lnc_000007	-4.11564	0.000769408	Solyc03g007200.2	-1.48642	2.87e-11	0.99652	1.81472e-05
Lnc_000007	-4.11564	0.000769408	Solyc03g031860.3	-1.25896	3.05e-07	0.996982	1.36487e-05
Lnc_000007	-4.11564	0.000769408	Solyc03g083730.1	-1.88594	6.83e-15	0.994741	4.14053e-05
Lnc_000007	-4.11564	0.000769408	Solyc03g083770.1	-1.68199	1.25e-08	0.995422	3.13842e-05
Lnc_000007	-4.11564	0.000769408	Solyc03g117690.3	-1.71706	6.34e-07	0.990936	0.00012285
Lnc_000007	-4.11564	0.000769408	Solyc03g119080.4	-1.41859	5.61e-08	0.996706	1.62624e-05
Lnc_000007	-4.11564	0.000769408	Solyc04g009020.3	-1.29046	3.5e-08	0.996169	2.19862e-05
Lnc_000007	-4.11564	0.000769408	Solyc04g040160.3	-1.69418	4.54e-12	0.99511	3.58071e-05
Lnc_000007	-4.11564	0.000769408	Solyc04g050930.3	-1.82484	4.22e-12	0.998476	3.48095e-06
Lnc_000007	-4.11564	0.000769408	Solyc04g074810.3	-1.55567	8.19e-07	0.990181	0.000144147
Lnc_000007	-4.11564	0.000769408	Solyc04g076190.1	-4.56104	1.68e-14	0.995472	3.07142e-05
Lnc_000007	-4.11564	0.000769408	Solyc04g078470.3	-2.28455	1.14e-17	0.997225	1.1542e-05
Lnc_000007	-4.11564	0.000769408	Solyc04g081870.3	-1.00403	6.64e-06	0.996941	1.40262e-05
Lnc_000007	-4.11564	0.000769408	Solyc05g006440.3	-1.14579	1.31e-07	0.99433	4.81368e-05
Lnc_000007	-4.11564	0.000769408	Solyc05g007830.3	-3.52625	2.88e-19	0.995653	2.83052e-05
Lnc_000007	-4.11564	0.000769408	Solyc05g009570.3	-2.05602	2.15e-08	0.996003	2.39287e-05
Lnc_000007	-4.11564	0.000769408	Solyc05g013510.3	-1.50996	1.2e-12	0.993704	5.93302e-05
Lnc_000007	-4.11564	0.000769408	Solyc05g013690.3	-1.62002	8.87e-12	0.992951	7.43505e-05
Lnc_000007	-4.11564	0.000769408	Solyc05g025600.1	-1.02978	3.26e-08	0.996624	1.708e-05
Lnc_000007	-4.11564	0.000769408	Solyc05g050110.3	-1.13339	2.65e-07	0.993909	5.55315e-05
Lnc_000007	-4.11564	0.000769408	Solyc06g068550.3	-2.42329	4.06e-12	0.990059	0.000147757
Lnc_000007	-4.11564	0.000769408	Solyc06g073760.3	-1.04187	1.94e-08	0.996451	1.88685e-05
Lnc_000007	-4.11564	0.000769408	Solyc06g074190.3	-1.62683	2.57e-15	0.991335	0.000112293
Lnc_000007	-4.11564	0.000769408	Solyc06g074200.3	-1.62683	2.57e-15	0.991335	0.000112293
Lnc_000007	-4.11564	0.000769408	Solyc06g084470.3	-1.23212	3.89e-06	0.997382	1.02732e-05
Lnc_000007	-4.11564	0.000769408	Solyc07g005190.3	-1.60656	3.72e-09	0.995207	3.44006e-05
Lnc_000007	-4.11564	0.000769408	Solyc07g043000.3	-2.77606	1.49e-24	0.995703	2.76616e-05
Lnc_000007	-4.11564	0.000769408	Solyc07g061790.3	-1.20974	2.64e-06	0.993886	5.5955e-05
Lnc_000007	-4.11564	0.000769408	Solyc07g062545.1	-1.32086	3.56e-12	0.991315	0.000112814
Lnc_000007	-4.11564	0.000769408	Solyc07g062550.3	-1.32086	3.56e-12	0.991315	0.000112814
Lnc_000007	-4.11564	0.000769408	Solyc07g063720.1	-1.15638	1.47e-07	0.995188	3.46755e-05
Lnc_000007	-4.11564	0.000769408	Solyc07g063730.2	-1.15638	1.47e-07	0.995188	3.46755e-05
Lnc_000007	-4.11564	0.000769408	Solyc07g064500.3	-1.47799	2.45e-13	0.993959	5.46355e-05
Lnc_000007	-4.11564	0.000769408	Solyc08g074480.1	-3.19365	1.29e-14	0.997348	1.0537e-05
Lnc_000007	-4.11564	0.000769408	Solyc08g077110.3	-2.50794	3.37e-09	0.998425	3.71769e-06
Lnc_000007	-4.11564	0.000769408	Solyc08g078870.2	-2.46848	3.69e-10	0.998152	5.1217e-06
Lnc_000007	-4.11564	0.000769408	Solyc08g079180.3	-1.05892	1.62e-06	0.99578	2.6677e-05
Lnc_000007	-4.11564	0.000769408	Solyc08g079240.3	-1.12591	2.17e-06	0.993557	6.21427e-05
Lnc_000007	-4.11564	0.000769408	Solyc08g080050.3	-1.20953	3.86e-08	0.999261	8.19528e-07
Lnc_000007	-4.11564	0.000769408	Solyc08g083210.3	-1.83595	7.06e-13	0.998459	3.55905e-06
Lnc_000007	-4.11564	0.000769408	Solyc08g083215.1	-1.83595	7.06e-13	0.998459	3.55905e-06
Lnc_000007	-4.11564	0.000769408	Solyc09g014870.1	-1.23011	3.5e-05	0.992107	9.32029e-05
Lnc_000007	-4.11564	0.000769408	Solyc09g059170.2	-3.64325	1.25e-41	0.994558	4.43394e-05
Lnc_000007	-4.11564	0.000769408	Solyc09g064500.3	-1.34827	3.16e-07	0.999079	1.27335e-06
Lnc_000007	-4.11564	0.000769408	Solyc09g074450.1	-1.16549	3.94e-05	0.991217	0.00011537
Lnc_000007	-4.11564	0.000769408	Solyc09g082690.3	-1.57262	3.55e-05	0.994701	4.20417e-05
Lnc_000007	-4.11564	0.000769408	Solyc09g082695.1	-1.57262	3.55e-05	0.994701	4.20417e-05
Lnc_000007	-4.11564	0.000769408	Solyc09g082700.2	-1.57262	3.55e-05	0.994701	4.20417e-05
Lnc_000007	-4.11564	0.000769408	Solyc09g090570.2	-1.2075	4.89e-06	0.999155	1.0698e-06
Lnc_000007	-4.11564	0.000769408	Solyc09g098290.3	-1.51079	6.83e-08	0.99582	2.61682e-05
Lnc_000007	-4.11564	0.000769408	Solyc10g005050.3	-2.25749	2.58e-18	0.991832	9.9802e-05
Lnc_000007	-4.11564	0.000769408	Solyc10g005620.3	-1.42087	2.77e-10	0.995107	3.58581e-05
Lnc_000007	-4.11564	0.000769408	Solyc10g007670.3	-1.31093	1.69e-05	0.99632	2.02912e-05
Lnc_000007	-4.11564	0.000769408	Solyc10g007690.3	-1.08576	5.17e-08	0.996927	1.41528e-05
Lnc_000007	-4.11564	0.000769408	Solyc10g018300.2	-1.27006	6.12e-08	0.997698	7.94377e-06
Lnc_000007	-4.11564	0.000769408	Solyc10g044520.2	-1.18433	1e-10	0.992558	8.28784e-05
Lnc_000007	-4.11564	0.000769408	Solyc10g050110.1	-2.38857	1.13e-21	0.992075	9.3952e-05
Lnc_000007	-4.11564	0.000769408	Solyc10g055390.2	-1.11568	1.6e-06	0.999134	1.12424e-06
Lnc_000007	-4.11564	0.000769408	Solyc11g005820.1	-1.11916	3.15e-05	0.996271	2.08321e-05
Lnc_000007	-4.11564	0.000769408	Solyc11g056290.2	-1.66557	6.54e-06	0.991724	0.000102451
Lnc_000007	-4.11564	0.000769408	Solyc11g066940.2	-1.93474	2.25e-14	0.991825	9.99812e-05
Lnc_000007	-4.11564	0.000769408	Solyc11g066950.2	-3.9409	1.96e-35	0.994662	4.26697e-05
Lnc_000007	-4.11564	0.000769408	Solyc11g072080.1	-1.37947	4.82e-06	0.99448	4.56175e-05
Lnc_000007	-4.11564	0.000769408	Solyc11g072110.2	-1.39925	4.38e-10	0.995076	3.6312e-05
Lnc_000007	-4.11564	0.000769408	Solyc12g005240.1	-1.17038	1.15e-08	0.994341	4.79515e-05
Lnc_000007	-4.11564	0.000769408	Solyc12g005630.2	-1.3757	4.95e-09	0.998229	4.70245e-06
Lnc_000007	-4.11564	0.000769408	Solyc12g008980.2	-1.24327	1.23e-07	0.9997	1.34987e-07
Lnc_000007	-4.11564	0.000769408	Solyc12g009417.1	-1.31328	1.51e-06	0.992259	8.96412e-05
Lnc_000007	-4.11564	0.000769408	Solyc12g009650.2	-2.88658	1.68e-13	0.992018	9.5317e-05
Lnc_000007	-4.11564	0.000769408	Solyc12g010320.2	-1.53274	1.1e-09	0.995662	2.81822e-05
Lnc_000007	-4.11564	0.000769408	Solyc12g014395.1	-1.06233	1.36e-06	0.995819	2.61854e-05
Lnc_000007	-4.11564	0.000769408	Solyc12g055970.2	-3.10698	1.17e-11	0.998577	3.03609e-06
Lnc_000007	-4.11564	0.000769408	Solyc12g096900.2	-1.72643	6.13e-13	0.994165	5.09728e-05
Lnc_000046	-7.49386	0.0420224	Solyc05g051440.1	-1.19395	1.41e-06	0.992137	9.24914e-05
Lnc_000048	-4.30912	0.000410597	Solyc00g013150.1	-1.99157	1.44e-06	0.994522	4.49277e-05
Lnc_000048	-4.30912	0.000410597	Solyc00g023700.2	-1.02503	2.44e-05	0.993644	6.04681e-05
Lnc_000048	-4.30912	0.000410597	Solyc00g023710.1	-1.00564	5.58e-06	0.996611	1.72084e-05
Lnc_000048	-4.30912	0.000410597	Solyc00g049220.1	-1.18811	1.09e-05	0.994161	5.10447e-05
Lnc_000048	-4.30912	0.000410597	Solyc00g069880.2	-1.08627	9.24e-06	0.996759	1.57418e-05
Lnc_000048	-4.30912	0.000410597	Solyc01g068130.3	-2.70185	1.87e-23	0.994347	4.78371e-05
Lnc_000048	-4.30912	0.000410597	Solyc01g079790.3	-1.34829	2.1e-11	0.99302	7.29017e-05
Lnc_000048	-4.30912	0.000410597	Solyc01g095450.3	-2.58519	3.24e-22	0.998926	1.72833e-06
Lnc_000048	-4.30912	0.000410597	Solyc01g098720.3	-1.85437	8.39e-09	0.99843	3.6938e-06
Lnc_000048	-4.30912	0.000410597	Solyc01g105030.3	-1.00253	6.47e-08	0.997484	9.48881e-06
Lnc_000048	-4.30912	0.000410597	Solyc01g105050.3	-1.00253	6.47e-08	0.997484	9.48881e-06
Lnc_000048	-4.30912	0.000410597	Solyc02g063380.1	-1.8234	1.18e-05	0.997065	1.29075e-05
Lnc_000048	-4.30912	0.000410597	Solyc02g065470.1	-2.25259	4.66e-06	0.997785	7.35477e-06
Lnc_000048	-4.30912	0.000410597	Solyc02g068070.3	-2.09311	8.88e-14	0.998923	1.73862e-06
Lnc_000048	-4.30912	0.000410597	Solyc02g069910.2	-1.46357	5.13e-06	0.992933	7.47413e-05
Lnc_000048	-4.30912	0.000410597	Solyc02g079950.3	-1.16991	2.89e-09	0.996198	2.16607e-05
Lnc_000048	-4.30912	0.000410597	Solyc02g081270.3	-1.38327	2.08e-09	0.9995	3.74993e-07
Lnc_000048	-4.30912	0.000410597	Solyc02g090100.1	-1.64842	9.52e-07	0.995019	3.71467e-05
Lnc_000048	-4.30912	0.000410597	Solyc02g091690.3	-2.71701	7.67e-15	0.999608	2.29951e-07
Lnc_000048	-4.30912	0.000410597	Solyc02g094330.3	-1.78293	1.62e-05	0.996211	2.15091e-05
Lnc_000048	-4.30912	0.000410597	Solyc03g007060.3	-1.25612	6.29e-11	0.991112	0.000118146
Lnc_000048	-4.30912	0.000410597	Solyc03g007200.2	-1.48642	2.87e-11	0.996546	1.7872e-05
Lnc_000048	-4.30912	0.000410597	Solyc03g019670.3	-1.16371	3.86e-05	0.991838	9.9646e-05
Lnc_000048	-4.30912	0.000410597	Solyc03g031860.3	-1.25896	3.05e-07	0.998531	3.23614e-06
Lnc_000048	-4.30912	0.000410597	Solyc03g083730.1	-1.88594	6.83e-15	0.993704	5.93349e-05
Lnc_000048	-4.30912	0.000410597	Solyc03g083770.1	-1.68199	1.25e-08	0.996374	1.97004e-05
Lnc_000048	-4.30912	0.000410597	Solyc03g117690.3	-1.71706	6.34e-07	0.993907	5.55799e-05
Lnc_000048	-4.30912	0.000410597	Solyc03g119080.4	-1.41859	5.61e-08	0.999457	4.42018e-07
Lnc_000048	-4.30912	0.000410597	Solyc03g119310.3	-1.12146	3.15e-07	0.992187	9.13323e-05
Lnc_000048	-4.30912	0.000410597	Solyc04g009020.3	-1.29046	3.5e-08	0.998908	1.78944e-06
Lnc_000048	-4.30912	0.000410597	Solyc04g011690.3	-1.41323	2.91e-06	0.990542	0.000133754
Lnc_000048	-4.30912	0.000410597	Solyc04g040160.3	-1.69418	4.54e-12	0.993127	7.06924e-05
Lnc_000048	-4.30912	0.000410597	Solyc04g050930.3	-1.82484	4.22e-12	0.997543	9.05078e-06
Lnc_000048	-4.30912	0.000410597	Solyc04g074810.3	-1.55567	8.19e-07	0.993586	6.1572e-05
Lnc_000048	-4.30912	0.000410597	Solyc04g076190.1	-4.56104	1.68e-14	0.998577	3.03778e-06
Lnc_000048	-4.30912	0.000410597	Solyc04g078470.3	-2.28455	1.14e-17	0.996745	1.58706e-05
Lnc_000048	-4.30912	0.000410597	Solyc04g081870.3	-1.00403	6.64e-06	0.998985	1.54605e-06
Lnc_000048	-4.30912	0.000410597	Solyc05g007830.3	-3.52625	2.88e-19	0.996063	2.32251e-05
Lnc_000048	-4.30912	0.000410597	Solyc05g009040.3	-1.49622	9.14e-07	0.992849	7.65282e-05
Lnc_000048	-4.30912	0.000410597	Solyc05g009570.3	-2.05602	2.15e-08	0.998725	2.43802e-06
Lnc_000048	-4.30912	0.000410597	Solyc05g013510.3	-1.50996	1.2e-12	0.992796	7.76562e-05
Lnc_000048	-4.30912	0.000410597	Solyc05g013690.3	-1.62002	8.87e-12	0.993062	7.20419e-05
Lnc_000048	-4.30912	0.000410597	Solyc05g025600.1	-1.02978	3.26e-08	0.997119	1.24404e-05
Lnc_000048	-4.30912	0.000410597	Solyc05g050110.3	-1.13339	2.65e-07	0.996034	2.35642e-05
Lnc_000048	-4.30912	0.000410597	Solyc06g007890.3	-1.01234	5.25e-07	0.992718	7.93458e-05
Lnc_000048	-4.30912	0.000410597	Solyc06g007910.3	-1.01234	5.25e-07	0.992718	7.93458e-05
Lnc_000048	-4.30912	0.000410597	Solyc06g068550.3	-2.42329	4.06e-12	0.994135	5.14974e-05
Lnc_000048	-4.30912	0.000410597	Solyc06g073760.3	-1.04187	1.94e-08	0.99315	7.02321e-05
Lnc_000048	-4.30912	0.000410597	Solyc06g074190.3	-1.62683	2.57e-15	0.990522	0.00013433
Lnc_000048	-4.30912	0.000410597	Solyc06g074200.3	-1.62683	2.57e-15	0.990522	0.00013433
Lnc_000048	-4.30912	0.000410597	Solyc06g084470.3	-1.23212	3.89e-06	0.992948	7.44175e-05
Lnc_000048	-4.30912	0.000410597	Solyc07g005190.3	-1.60656	3.72e-09	0.997993	6.0351e-06
Lnc_000048	-4.30912	0.000410597	Solyc07g018383.1	-1.79963	1.55e-05	0.992469	8.48559e-05
Lnc_000048	-4.30912	0.000410597	Solyc07g043000.3	-2.77606	1.49e-24	0.995252	3.37596e-05
Lnc_000048	-4.30912	0.000410597	Solyc07g061790.3	-1.20974	2.64e-06	0.998221	4.742e-06
Lnc_000048	-4.30912	0.000410597	Solyc07g062545.1	-1.32086	3.56e-12	0.991561	0.000106514
Lnc_000048	-4.30912	0.000410597	Solyc07g062550.3	-1.32086	3.56e-12	0.991561	0.000106514
Lnc_000048	-4.30912	0.000410597	Solyc07g063720.1	-1.15638	1.47e-07	0.998874	1.90221e-06
Lnc_000048	-4.30912	0.000410597	Solyc07g063730.2	-1.15638	1.47e-07	0.998874	1.90221e-06
Lnc_000048	-4.30912	0.000410597	Solyc07g064500.3	-1.47799	2.45e-13	0.991967	9.65344e-05
Lnc_000048	-4.30912	0.000410597	Solyc08g008630.3	-1.1728	5.34e-08	0.991076	0.000119089
Lnc_000048	-4.30912	0.000410597	Solyc08g074480.1	-3.19365	1.29e-14	0.99826	4.53916e-06
Lnc_000048	-4.30912	0.000410597	Solyc08g077110.3	-2.50794	3.37e-09	0.99972	1.17472e-07
Lnc_000048	-4.30912	0.000410597	Solyc08g078870.2	-2.46848	3.69e-10	0.999002	1.49286e-06
Lnc_000048	-4.30912	0.000410597	Solyc08g079180.3	-1.05892	1.62e-06	0.998832	2.04518e-06
Lnc_000048	-4.30912	0.000410597	Solyc08g079240.3	-1.12591	2.17e-06	0.996392	1.95007e-05
Lnc_000048	-4.30912	0.000410597	Solyc08g080050.3	-1.20953	3.86e-08	0.998072	5.56964e-06
Lnc_000048	-4.30912	0.000410597	Solyc08g083210.3	-1.83595	7.06e-13	0.999274	7.89677e-07
Lnc_000048	-4.30912	0.000410597	Solyc08g083215.1	-1.83595	7.06e-13	0.999274	7.89677e-07
Lnc_000048	-4.30912	0.000410597	Solyc09g014870.1	-1.23011	3.5e-05	0.9941	5.2116e-05
Lnc_000048	-4.30912	0.000410597	Solyc09g059170.2	-3.64325	1.25e-41	0.992399	8.6434e-05
Lnc_000048	-4.30912	0.000410597	Solyc09g064500.3	-1.34827	3.16e-07	0.999044	1.37133e-06
Lnc_000048	-4.30912	0.000410597	Solyc09g074450.1	-1.16549	3.94e-05	0.991645	0.000104424
Lnc_000048	-4.30912	0.000410597	Solyc09g082080.1	-1.23924	0.000224663	0.991694	0.000103198
Lnc_000048	-4.30912	0.000410597	Solyc09g082690.3	-1.57262	3.55e-05	0.997987	6.07669e-06
Lnc_000048	-4.30912	0.000410597	Solyc09g082695.1	-1.57262	3.55e-05	0.997987	6.07669e-06
Lnc_000048	-4.30912	0.000410597	Solyc09g082700.2	-1.57262	3.55e-05	0.997987	6.07669e-06
Lnc_000048	-4.30912	0.000410597	Solyc09g090570.2	-1.2075	4.89e-06	0.999323	6.876e-07
Lnc_000048	-4.30912	0.000410597	Solyc09g098290.3	-1.51079	6.83e-08	0.997336	1.06346e-05
Lnc_000048	-4.30912	0.000410597	Solyc10g005620.3	-1.42087	2.77e-10	0.997404	1.01e-05
Lnc_000048	-4.30912	0.000410597	Solyc10g006800.3	-1.0543	5.88e-05	0.993166	6.98875e-05
Lnc_000048	-4.30912	0.000410597	Solyc10g007670.3	-1.31093	1.69e-05	0.995265	3.35737e-05
Lnc_000048	-4.30912	0.000410597	Solyc10g007690.3	-1.08576	5.17e-08	0.99862	2.85419e-06
Lnc_000048	-4.30912	0.000410597	Solyc10g018300.2	-1.27006	6.12e-08	0.999585	2.58402e-07
Lnc_000048	-4.30912	0.000410597	Solyc10g044520.2	-1.18433	1e-10	0.992374	8.70052e-05
Lnc_000048	-4.30912	0.000410597	Solyc10g050110.1	-2.38857	1.13e-21	0.990587	0.000132499
Lnc_000048	-4.30912	0.000410597	Solyc10g055390.2	-1.11568	1.6e-06	0.999654	1.79849e-07
Lnc_000048	-4.30912	0.000410597	Solyc10g085240.1	-1.09157	9.08e-05	0.99273	7.90864e-05
Lnc_000048	-4.30912	0.000410597	Solyc10g085280.1	-1.09157	9.08e-05	0.99273	7.90864e-05
Lnc_000048	-4.30912	0.000410597	Solyc11g005820.1	-1.11916	3.15e-05	0.992784	7.79278e-05
Lnc_000048	-4.30912	0.000410597	Solyc11g066940.2	-1.93474	2.25e-14	0.990427	0.000137017
Lnc_000048	-4.30912	0.000410597	Solyc11g066950.2	-3.9409	1.96e-35	0.993986	5.414e-05
Lnc_000048	-4.30912	0.000410597	Solyc11g072080.1	-1.37947	4.82e-06	0.997382	1.02751e-05
Lnc_000048	-4.30912	0.000410597	Solyc11g072110.2	-1.39925	4.38e-10	0.994456	4.60208e-05
Lnc_000048	-4.30912	0.000410597	Solyc12g005240.1	-1.17038	1.15e-08	0.992844	7.66276e-05
Lnc_000048	-4.30912	0.000410597	Solyc12g005630.2	-1.3757	4.95e-09	0.9989	1.81528e-06
Lnc_000048	-4.30912	0.000410597	Solyc12g007160.2	-2.07733	0.000207147	0.990666	0.00013027
Lnc_000048	-4.30912	0.000410597	Solyc12g008980.2	-1.24327	1.23e-07	0.999326	6.80834e-07
Lnc_000048	-4.30912	0.000410597	Solyc12g009417.1	-1.31328	1.51e-06	0.995017	3.71826e-05
Lnc_000048	-4.30912	0.000410597	Solyc12g009650.2	-2.88658	1.68e-13	0.995155	3.51508e-05
Lnc_000048	-4.30912	0.000410597	Solyc12g010320.2	-1.53274	1.1e-09	0.997312	1.08296e-05
Lnc_000048	-4.30912	0.000410597	Solyc12g014395.1	-1.06233	1.36e-06	0.991395	0.000110758
Lnc_000048	-4.30912	0.000410597	Solyc12g014620.2	-3.11596	1.27e-13	0.992494	8.43075e-05
Lnc_000048	-4.30912	0.000410597	Solyc12g014630.1	-3.11596	1.27e-13	0.992494	8.43075e-05
Lnc_000048	-4.30912	0.000410597	Solyc12g055970.2	-3.10698	1.17e-11	0.999502	3.72014e-07
Lnc_000048	-4.30912	0.000410597	Solyc12g096900.2	-1.72643	6.13e-13	0.994654	4.27979e-05
Lnc_000060	-3.66162	0.0124245	Solyc00g013170.1	-2.99598	6.12e-06	0.993805	5.74396e-05
Lnc_000060	-3.66162	0.0124245	Solyc04g011690.3	-1.41323	2.91e-06	0.992818	7.71812e-05
Lnc_000060	-3.66162	0.0124245	Solyc05g041810.1	-1.03251	0.00170877	0.992837	7.67698e-05
Lnc_000060	-3.66162	0.0124245	Solyc06g024210.2	-1.12394	0.00227149	0.99029	0.000140974
Lnc_000060	-3.66162	0.0124245	Solyc08g045880.1	-1.74279	0.000788482	0.994548	4.45012e-05
Lnc_000060	-3.66162	0.0124245	Solyc08g061160.2	-1.43946	0.000270054	0.991859	9.91361e-05
Lnc_000060	-3.66162	0.0124245	Solyc11g056260.1	-1.66481	0.0227025	0.990512	0.000134595
Lnc_000075	-5.02773	0.0262407	Solyc00g007570.2	-1.38854	0.00940095	0.999102	1.20957e-06
Lnc_000075	-5.02773	0.0262407	Solyc00g013170.1	-2.99598	6.12e-06	0.9984	3.83768e-06
Lnc_000075	-5.02773	0.0262407	Solyc00g023580.1	-1.7389	0.000622086	0.998547	3.16661e-06
Lnc_000075	-5.02773	0.0262407	Solyc00g023590.2	-1.7389	0.000622086	0.998547	3.16661e-06
Lnc_000075	-5.02773	0.0262407	Solyc00g023600.2	-1.7389	0.000622086	0.998547	3.16661e-06
Lnc_000075	-5.02773	0.0262407	Solyc00g023700.2	-1.02503	2.44e-05	0.99163	0.000104801
Lnc_000075	-5.02773	0.0262407	Solyc00g025300.1	-3.04606	0.0461195	0.992293	8.88792e-05
Lnc_000075	-5.02773	0.0262407	Solyc00g047190.1	-2.12127	1.44e-05	0.99952	3.45881e-07
Lnc_000075	-5.02773	0.0262407	Solyc00g049220.1	-1.18811	1.09e-05	0.992744	7.87938e-05
Lnc_000075	-5.02773	0.0262407	Solyc00g052540.1	-1.61643	0.00133026	0.999203	9.51432e-07
Lnc_000075	-5.02773	0.0262407	Solyc00g068970.2	-1.38757	0.000376637	0.999012	1.46493e-06
Lnc_000075	-5.02773	0.0262407	Solyc00g094540.1	-1.13728	0.000131723	0.995815	2.6238e-05
Lnc_000075	-5.02773	0.0262407	Solyc00g108550.1	-1.23613	0.00560474	0.998669	2.65488e-06
Lnc_000075	-5.02773	0.0262407	Solyc00g164580.1	-1.46565	0.00903672	0.999844	3.64862e-08
Lnc_000075	-5.02773	0.0262407	Solyc00g181250.2	-1.2935	0.000572948	0.99892	1.74975e-06
Lnc_000075	-5.02773	0.0262407	Solyc00g230060.2	-1.17002	0.0181582	0.991829	9.98739e-05
Lnc_000075	-5.02773	0.0262407	Solyc00g281110.1	-2.15641	2.89e-05	0.997782	7.37646e-06
Lnc_000075	-5.02773	0.0262407	Solyc01g005990.3	-2.00575	0.000716178	0.99794	6.36199e-06
Lnc_000075	-5.02773	0.0262407	Solyc01g066910.3	-1.77955	0.0111404	0.999594	2.46909e-07
Lnc_000075	-5.02773	0.0262407	Solyc01g096940.3	-1.48592	0.00305786	0.998895	1.83032e-06
Lnc_000075	-5.02773	0.0262407	Solyc01g109390.3	-1.42744	0.00853628	0.999078	1.27558e-06
Lnc_000075	-5.02773	0.0262407	Solyc02g069910.2	-1.46357	5.13e-06	0.992311	8.84574e-05
Lnc_000075	-5.02773	0.0262407	Solyc03g007690.1	-1.99353	5.87e-07	0.994862	3.95347e-05
Lnc_000075	-5.02773	0.0262407	Solyc03g019670.3	-1.16371	3.86e-05	0.994383	4.72453e-05
Lnc_000075	-5.02773	0.0262407	Solyc03g061655.1	-2.11154	0.000104374	0.99836	4.03111e-06
Lnc_000075	-5.02773	0.0262407	Solyc03g117690.3	-1.71706	6.34e-07	0.993189	6.94312e-05
Lnc_000075	-5.02773	0.0262407	Solyc03g119310.3	-1.12146	3.15e-07	0.994563	4.42554e-05
Lnc_000075	-5.02773	0.0262407	Solyc03g121900.1	-4.59619	7.53e-06	0.999543	3.13622e-07
Lnc_000075	-5.02773	0.0262407	Solyc04g009590.3	-1.19425	0.000330588	0.994857	3.9607e-05
Lnc_000075	-5.02773	0.0262407	Solyc04g011690.3	-1.41323	2.91e-06	0.990579	0.000132708
Lnc_000075	-5.02773	0.0262407	Solyc04g074810.3	-1.55567	8.19e-07	0.993617	6.09787e-05
Lnc_000075	-5.02773	0.0262407	Solyc05g009040.3	-1.49622	9.14e-07	0.991282	0.000113662
Lnc_000075	-5.02773	0.0262407	Solyc05g010180.3	-1.01244	0.000568443	0.998732	2.41051e-06
Lnc_000075	-5.02773	0.0262407	Solyc05g015658.1	-1.44739	2.69e-05	0.997612	8.55027e-06
Lnc_000075	-5.02773	0.0262407	Solyc05g015680.2	-1.44739	2.69e-05	0.997612	8.55027e-06
Lnc_000075	-5.02773	0.0262407	Solyc05g021410.2	-3.04241	0.00246823	0.99946	4.37969e-07
Lnc_000075	-5.02773	0.0262407	Solyc05g041810.1	-1.03251	0.00170877	0.996014	2.38033e-05
Lnc_000075	-5.02773	0.0262407	Solyc06g005070.2	-1.78612	0.00119446	0.997051	1.30306e-05
Lnc_000075	-5.02773	0.0262407	Solyc06g024210.2	-1.12394	0.00227149	0.999007	1.47738e-06
Lnc_000075	-5.02773	0.0262407	Solyc06g035455.1	-1.99128	0.000437665	0.992796	7.76529e-05
Lnc_000075	-5.02773	0.0262407	Solyc06g035480.3	-1.99128	0.000437665	0.992796	7.76529e-05
Lnc_000075	-5.02773	0.0262407	Solyc06g066750.3	-1.26553	0.00750265	0.999488	3.92388e-07
Lnc_000075	-5.02773	0.0262407	Solyc06g066760.3	-1.26553	0.00750265	0.999488	3.92388e-07
Lnc_000075	-5.02773	0.0262407	Solyc06g068550.3	-2.42329	4.06e-12	0.993155	7.01142e-05
Lnc_000075	-5.02773	0.0262407	Solyc07g007860.1	-1.37229	0.000322839	0.997362	1.04309e-05
Lnc_000075	-5.02773	0.0262407	Solyc07g019500.2	-1.02168	0.00757034	0.99691	1.43067e-05
Lnc_000075	-5.02773	0.0262407	Solyc07g065110.1	-1.72639	0.0187635	0.998642	2.7655e-06
Lnc_000075	-5.02773	0.0262407	Solyc08g045880.1	-1.74279	0.000788482	0.996221	2.13899e-05
Lnc_000075	-5.02773	0.0262407	Solyc08g061160.2	-1.43946	0.000270054	0.999601	2.38435e-07
Lnc_000075	-5.02773	0.0262407	Solyc08g066365.1	-1.49882	0.00722341	0.994929	3.85123e-05
Lnc_000075	-5.02773	0.0262407	Solyc08g066370.2	-1.49882	0.00722341	0.994929	3.85123e-05
Lnc_000075	-5.02773	0.0262407	Solyc08g068165.1	-1.16495	0.00359169	0.997632	8.40273e-06
Lnc_000075	-5.02773	0.0262407	Solyc08g068170.1	-1.16495	0.00359169	0.997632	8.40273e-06
Lnc_000075	-5.02773	0.0262407	Solyc08g078890.2	-2.60336	0.000280741	0.999205	9.47856e-07
Lnc_000075	-5.02773	0.0262407	Solyc08g078900.1	-2.1788	0.00073895	0.997945	6.3326e-06
Lnc_000075	-5.02773	0.0262407	Solyc08g078940.1	-2.60336	0.000280741	0.999205	9.47856e-07
Lnc_000075	-5.02773	0.0262407	Solyc09g011010.3	-1.00116	0.000739941	0.991105	0.000118328
Lnc_000075	-5.02773	0.0262407	Solyc09g011023.1	-1.00116	0.000739941	0.991105	0.000118328
Lnc_000075	-5.02773	0.0262407	Solyc09g015900.1	-1.58902	9.36e-05	0.997406	1.00812e-05
Lnc_000075	-5.02773	0.0262407	Solyc09g072700.3	-2.78741	0.000228748	0.998798	2.16581e-06
Lnc_000075	-5.02773	0.0262407	Solyc10g006800.3	-1.0543	5.88e-05	0.991997	9.58234e-05
Lnc_000075	-5.02773	0.0262407	Solyc10g047030.3	-1.62734	0.0325773	0.996894	1.44576e-05
Lnc_000075	-5.02773	0.0262407	Solyc10g048060.1	-1.08124	0.000178412	0.992757	7.84949e-05
Lnc_000075	-5.02773	0.0262407	Solyc10g050440.2	-1.00195	0.000273063	0.994854	3.96537e-05
Lnc_000075	-5.02773	0.0262407	Solyc11g038340.1	-1.50293	0.00660232	0.9997	1.34744e-07
Lnc_000075	-5.02773	0.0262407	Solyc11g038350.1	-1.50293	0.00660232	0.9997	1.34744e-07
Lnc_000075	-5.02773	0.0262407	Solyc11g039350.1	-1.7181	0.0010507	0.999695	1.39595e-07
Lnc_000075	-5.02773	0.0262407	Solyc11g039370.2	-1.45538	0.00152891	0.999023	1.43142e-06
Lnc_000075	-5.02773	0.0262407	Solyc11g039380.1	-1.12467	0.00542913	0.998548	3.16159e-06
Lnc_000075	-5.02773	0.0262407	Solyc11g056260.1	-1.66481	0.0227025	0.995316	3.28576e-05
Lnc_000075	-5.02773	0.0262407	Solyc11g056280.1	-1.53279	0.0129714	0.992296	8.87929e-05
Lnc_000075	-5.02773	0.0262407	Solyc11g056530.1	-1.12838	0.0011821	0.990093	0.000146736
Lnc_000075	-5.02773	0.0262407	Solyc11g056637.1	-1.26858	0.00243683	0.996962	1.38313e-05
Lnc_000075	-5.02773	0.0262407	Solyc11g061700.2	-1.74605	3.17e-12	0.999537	3.21408e-07
Lnc_000075	-5.02773	0.0262407	Solyc11g063570.1	-1.33761	0.00330413	0.998995	1.51548e-06
Lnc_000075	-5.02773	0.0262407	Solyc11g063580.2	-1.19662	8.58e-05	0.998215	4.77704e-06
Lnc_000075	-5.02773	0.0262407	Solyc12g007160.2	-2.07733	0.000207147	0.995672	2.80619e-05
Lnc_000075	-5.02773	0.0262407	Solyc12g009417.1	-1.31328	1.51e-06	0.991935	9.72986e-05
Lnc_000075	-5.02773	0.0262407	Solyc12g009650.2	-2.88658	1.68e-13	0.991954	9.68544e-05
Lnc_000075	-5.02773	0.0262407	Solyc12g014620.2	-3.11596	1.27e-13	0.993879	5.60766e-05
Lnc_000075	-5.02773	0.0262407	Solyc12g014630.1	-3.11596	1.27e-13	0.993879	5.60766e-05
Lnc_000075	-5.02773	0.0262407	Solyc12g087940.2	-2.16116	0.00833103	0.999514	3.54516e-07
Lnc_000075	-5.02773	0.0262407	Solyc12g088640.2	-2.80595	5.29e-05	0.999497	3.79275e-07
Lnc_000078	-5.1292	2.44e-16	Solyc00g023580.1	-1.7389	0.000622086	0.994498	4.53254e-05
Lnc_000078	-5.1292	2.44e-16	Solyc00g023590.2	-1.7389	0.000622086	0.994498	4.53254e-05
Lnc_000078	-5.1292	2.44e-16	Solyc00g023600.2	-1.7389	0.000622086	0.994498	4.53254e-05
Lnc_000078	-5.1292	2.44e-16	Solyc00g023700.2	-1.02503	2.44e-05	0.998381	3.92756e-06
Lnc_000078	-5.1292	2.44e-16	Solyc00g023710.1	-1.00564	5.58e-06	0.997089	1.26953e-05
Lnc_000078	-5.1292	2.44e-16	Solyc00g047190.1	-2.12127	1.44e-05	0.991584	0.000105953
Lnc_000078	-5.1292	2.44e-16	Solyc00g049220.1	-1.18811	1.09e-05	0.999253	8.37791e-07
Lnc_000078	-5.1292	2.44e-16	Solyc00g052540.1	-1.61643	0.00133026	0.991971	9.64293e-05
Lnc_000078	-5.1292	2.44e-16	Solyc00g069880.2	-1.08627	9.24e-06	0.998949	1.65623e-06
Lnc_000078	-5.1292	2.44e-16	Solyc00g094540.1	-1.13728	0.000131723	0.993696	5.94905e-05
Lnc_000078	-5.1292	2.44e-16	Solyc00g108550.1	-1.23613	0.00560474	0.993936	5.50438e-05
Lnc_000078	-5.1292	2.44e-16	Solyc00g281110.1	-2.15641	2.89e-05	0.994579	4.39945e-05
Lnc_000078	-5.1292	2.44e-16	Solyc01g005990.3	-2.00575	0.000716178	0.994998	3.7473e-05
Lnc_000078	-5.1292	2.44e-16	Solyc01g095450.3	-2.58519	3.24e-22	0.99864	2.77285e-06
Lnc_000078	-5.1292	2.44e-16	Solyc01g096940.3	-1.48592	0.00305786	0.993889	5.58968e-05
Lnc_000078	-5.1292	2.44e-16	Solyc01g098720.3	-1.85437	8.39e-09	0.996358	1.98768e-05
Lnc_000078	-5.1292	2.44e-16	Solyc01g109390.3	-1.42744	0.00853628	0.990797	0.000126653
Lnc_000078	-5.1292	2.44e-16	Solyc02g063380.1	-1.8234	1.18e-05	0.999211	9.34402e-07
Lnc_000078	-5.1292	2.44e-16	Solyc02g065470.1	-2.25259	4.66e-06	0.999629	2.0666e-07
Lnc_000078	-5.1292	2.44e-16	Solyc02g068070.3	-2.09311	8.88e-14	0.991851	9.93313e-05
Lnc_000078	-5.1292	2.44e-16	Solyc02g069910.2	-1.46357	5.13e-06	0.996933	1.40973e-05
Lnc_000078	-5.1292	2.44e-16	Solyc02g081270.3	-1.38327	2.08e-09	0.998226	4.71975e-06
Lnc_000078	-5.1292	2.44e-16	Solyc02g090100.1	-1.64842	9.52e-07	0.992548	8.30914e-05
Lnc_000078	-5.1292	2.44e-16	Solyc02g091690.3	-2.71701	7.67e-15	0.997419	9.98497e-06
Lnc_000078	-5.1292	2.44e-16	Solyc02g094330.3	-1.78293	1.62e-05	0.999606	2.32447e-07
Lnc_000078	-5.1292	2.44e-16	Solyc03g007690.1	-1.99353	5.87e-07	0.997713	7.8376e-06
Lnc_000078	-5.1292	2.44e-16	Solyc03g019670.3	-1.16371	3.86e-05	0.998536	3.21501e-06
Lnc_000078	-5.1292	2.44e-16	Solyc03g031860.3	-1.25896	3.05e-07	0.996435	1.90413e-05
Lnc_000078	-5.1292	2.44e-16	Solyc03g061655.1	-2.11154	0.000104374	0.992055	9.44268e-05
Lnc_000078	-5.1292	2.44e-16	Solyc03g117690.3	-1.71706	6.34e-07	0.997879	6.74027e-06
Lnc_000078	-5.1292	2.44e-16	Solyc03g119080.4	-1.41859	5.61e-08	0.998664	2.67564e-06
Lnc_000078	-5.1292	2.44e-16	Solyc03g119310.3	-1.12146	3.15e-07	0.998003	5.97713e-06
Lnc_000078	-5.1292	2.44e-16	Solyc03g121900.1	-4.59619	7.53e-06	0.991898	9.8201e-05
Lnc_000078	-5.1292	2.44e-16	Solyc04g009020.3	-1.29046	3.5e-08	0.994811	4.032e-05
Lnc_000078	-5.1292	2.44e-16	Solyc04g009590.3	-1.19425	0.000330588	0.996223	2.13696e-05
Lnc_000078	-5.1292	2.44e-16	Solyc04g011690.3	-1.41323	2.91e-06	0.992673	8.03336e-05
Lnc_000078	-5.1292	2.44e-16	Solyc04g074810.3	-1.55567	8.19e-07	0.998126	5.26231e-06
Lnc_000078	-5.1292	2.44e-16	Solyc04g076190.1	-4.56104	1.68e-14	0.999364	6.07151e-07
Lnc_000078	-5.1292	2.44e-16	Solyc04g081870.3	-1.00403	6.64e-06	0.998454	3.58426e-06
Lnc_000078	-5.1292	2.44e-16	Solyc05g009040.3	-1.49622	9.14e-07	0.999121	1.15737e-06
Lnc_000078	-5.1292	2.44e-16	Solyc05g009570.3	-2.05602	2.15e-08	0.997457	9.6906e-06
Lnc_000078	-5.1292	2.44e-16	Solyc05g010180.3	-1.01244	0.000568443	0.990642	0.000130947
Lnc_000078	-5.1292	2.44e-16	Solyc05g012600.3	-1.0515	0.000944289	0.996918	1.423e-05
Lnc_000078	-5.1292	2.44e-16	Solyc05g015658.1	-1.44739	2.69e-05	0.995306	3.29963e-05
Lnc_000078	-5.1292	2.44e-16	Solyc05g015680.2	-1.44739	2.69e-05	0.995306	3.29963e-05
Lnc_000078	-5.1292	2.44e-16	Solyc06g005070.2	-1.78612	0.00119446	0.99603	2.36155e-05
Lnc_000078	-5.1292	2.44e-16	Solyc06g024210.2	-1.12394	0.00227149	0.99211	9.31242e-05
Lnc_000078	-5.1292	2.44e-16	Solyc06g035455.1	-1.99128	0.000437665	0.996474	1.86321e-05
Lnc_000078	-5.1292	2.44e-16	Solyc06g035480.3	-1.99128	0.000437665	0.996474	1.86321e-05
Lnc_000078	-5.1292	2.44e-16	Solyc06g066750.3	-1.26553	0.00750265	0.992245	8.99808e-05
Lnc_000078	-5.1292	2.44e-16	Solyc06g066760.3	-1.26553	0.00750265	0.992245	8.99808e-05
Lnc_000078	-5.1292	2.44e-16	Solyc06g068550.3	-2.42329	4.06e-12	0.99897	1.59186e-06
Lnc_000078	-5.1292	2.44e-16	Solyc07g005190.3	-1.60656	3.72e-09	0.99373	5.88473e-05
Lnc_000078	-5.1292	2.44e-16	Solyc07g007860.1	-1.37229	0.000322839	0.993908	5.55572e-05
Lnc_000078	-5.1292	2.44e-16	Solyc07g018383.1	-1.79963	1.55e-05	0.997169	1.20064e-05
Lnc_000078	-5.1292	2.44e-16	Solyc07g061790.3	-1.20974	2.64e-06	0.999314	7.0547e-07
Lnc_000078	-5.1292	2.44e-16	Solyc07g063720.1	-1.15638	1.47e-07	0.999153	1.07556e-06
Lnc_000078	-5.1292	2.44e-16	Solyc07g063730.2	-1.15638	1.47e-07	0.999153	1.07556e-06
Lnc_000078	-5.1292	2.44e-16	Solyc08g074480.1	-3.19365	1.29e-14	0.990925	0.000123156
Lnc_000078	-5.1292	2.44e-16	Solyc08g077110.3	-2.50794	3.37e-09	0.994745	4.13473e-05
Lnc_000078	-5.1292	2.44e-16	Solyc08g078870.2	-2.46848	3.69e-10	0.992633	8.1211e-05
Lnc_000078	-5.1292	2.44e-16	Solyc08g078890.2	-2.60336	0.000280741	0.992612	8.16617e-05
Lnc_000078	-5.1292	2.44e-16	Solyc08g078900.1	-2.1788	0.00073895	0.995706	2.76203e-05
Lnc_000078	-5.1292	2.44e-16	Solyc08g078940.1	-2.60336	0.000280741	0.992612	8.16617e-05
Lnc_000078	-5.1292	2.44e-16	Solyc08g079180.3	-1.05892	1.62e-06	0.997065	1.29112e-05
Lnc_000078	-5.1292	2.44e-16	Solyc08g079240.3	-1.12591	2.17e-06	0.990556	0.000133371
Lnc_000078	-5.1292	2.44e-16	Solyc08g080050.3	-1.20953	3.86e-08	0.990111	0.000146218
Lnc_000078	-5.1292	2.44e-16	Solyc08g083210.3	-1.83595	7.06e-13	0.993052	7.22547e-05
Lnc_000078	-5.1292	2.44e-16	Solyc08g083215.1	-1.83595	7.06e-13	0.993052	7.22547e-05
Lnc_000078	-5.1292	2.44e-16	Solyc09g011010.3	-1.00116	0.000739941	0.996395	1.9466e-05
Lnc_000078	-5.1292	2.44e-16	Solyc09g011023.1	-1.00116	0.000739941	0.996395	1.9466e-05
Lnc_000078	-5.1292	2.44e-16	Solyc09g014870.1	-1.23011	3.5e-05	0.992706	7.96162e-05
Lnc_000078	-5.1292	2.44e-16	Solyc09g015900.1	-1.58902	9.36e-05	0.990109	0.000146256
Lnc_000078	-5.1292	2.44e-16	Solyc09g064500.3	-1.34827	3.16e-07	0.994475	4.57106e-05
Lnc_000078	-5.1292	2.44e-16	Solyc09g072700.3	-2.78741	0.000228748	0.994227	4.98878e-05
Lnc_000078	-5.1292	2.44e-16	Solyc09g074450.1	-1.16549	3.94e-05	0.992284	8.90704e-05
Lnc_000078	-5.1292	2.44e-16	Solyc09g082080.1	-1.23924	0.000224663	0.995339	3.25367e-05
Lnc_000078	-5.1292	2.44e-16	Solyc09g082690.3	-1.57262	3.55e-05	0.999435	4.79469e-07
Lnc_000078	-5.1292	2.44e-16	Solyc09g082695.1	-1.57262	3.55e-05	0.999435	4.79469e-07
Lnc_000078	-5.1292	2.44e-16	Solyc09g082700.2	-1.57262	3.55e-05	0.999435	4.79469e-07
Lnc_000078	-5.1292	2.44e-16	Solyc09g090570.2	-1.2075	4.89e-06	0.995013	3.72458e-05
Lnc_000078	-5.1292	2.44e-16	Solyc09g098290.3	-1.51079	6.83e-08	0.997819	7.1297e-06
Lnc_000078	-5.1292	2.44e-16	Solyc10g005620.3	-1.42087	2.77e-10	0.992347	8.76187e-05
Lnc_000078	-5.1292	2.44e-16	Solyc10g006800.3	-1.0543	5.88e-05	0.997624	8.46303e-06
Lnc_000078	-5.1292	2.44e-16	Solyc10g007670.3	-1.31093	1.69e-05	0.990056	0.000147831
Lnc_000078	-5.1292	2.44e-16	Solyc10g007690.3	-1.08576	5.17e-08	0.99254	8.32636e-05
Lnc_000078	-5.1292	2.44e-16	Solyc10g018300.2	-1.27006	6.12e-08	0.996012	2.38238e-05
Lnc_000078	-5.1292	2.44e-16	Solyc10g048060.1	-1.08124	0.000178412	0.997711	7.85122e-06
Lnc_000078	-5.1292	2.44e-16	Solyc10g050440.2	-1.00195	0.000273063	0.995843	2.58809e-05
Lnc_000078	-5.1292	2.44e-16	Solyc10g055390.2	-1.11568	1.6e-06	0.995229	3.40899e-05
Lnc_000078	-5.1292	2.44e-16	Solyc10g085240.1	-1.09157	9.08e-05	0.997822	7.1122e-06
Lnc_000078	-5.1292	2.44e-16	Solyc10g085280.1	-1.09157	9.08e-05	0.997822	7.1122e-06
Lnc_000078	-5.1292	2.44e-16	Solyc11g039370.2	-1.45538	0.00152891	0.993004	7.32405e-05
Lnc_000078	-5.1292	2.44e-16	Solyc11g039380.1	-1.12467	0.00542913	0.994201	5.03451e-05
Lnc_000078	-5.1292	2.44e-16	Solyc11g056530.1	-1.12838	0.0011821	0.994577	4.4034e-05
Lnc_000078	-5.1292	2.44e-16	Solyc11g061700.2	-1.74605	3.17e-12	0.992013	9.54446e-05
Lnc_000078	-5.1292	2.44e-16	Solyc11g063570.1	-1.33761	0.00330413	0.993175	6.9707e-05
Lnc_000078	-5.1292	2.44e-16	Solyc11g063580.2	-1.19662	8.58e-05	0.994336	4.80228e-05
Lnc_000078	-5.1292	2.44e-16	Solyc11g072080.1	-1.37947	4.82e-06	0.998687	2.58305e-06
Lnc_000078	-5.1292	2.44e-16	Solyc12g005630.2	-1.3757	4.95e-09	0.992633	8.12084e-05
Lnc_000078	-5.1292	2.44e-16	Solyc12g007160.2	-2.07733	0.000207147	0.997765	7.48536e-06
Lnc_000078	-5.1292	2.44e-16	Solyc12g008980.2	-1.24327	1.23e-07	0.993703	5.93512e-05
Lnc_000078	-5.1292	2.44e-16	Solyc12g009417.1	-1.31328	1.51e-06	0.998204	4.83315e-06
Lnc_000078	-5.1292	2.44e-16	Solyc12g009650.2	-2.88658	1.68e-13	0.998642	2.76321e-06
Lnc_000078	-5.1292	2.44e-16	Solyc12g010320.2	-1.53274	1.1e-09	0.990818	0.000126067
Lnc_000078	-5.1292	2.44e-16	Solyc12g014620.2	-3.11596	1.27e-13	0.998918	1.75623e-06
Lnc_000078	-5.1292	2.44e-16	Solyc12g014630.1	-3.11596	1.27e-13	0.998918	1.75623e-06
Lnc_000078	-5.1292	2.44e-16	Solyc12g055970.2	-3.10698	1.17e-11	0.993678	5.98311e-05
Lnc_000078	-5.1292	2.44e-16	Solyc12g088640.2	-2.80595	5.29e-05	0.991138	0.00011746
Lnc_000094	-2.39848	0.0249032	Solyc00g023580.1	-1.7389	0.000622086	0.990409	0.000137535
Lnc_000094	-2.39848	0.0249032	Solyc00g023590.2	-1.7389	0.000622086	0.990409	0.000137535
Lnc_000094	-2.39848	0.0249032	Solyc00g023600.2	-1.7389	0.000622086	0.990409	0.000137535
Lnc_000094	-2.39848	0.0249032	Solyc00g025300.1	-3.04606	0.0461195	0.991662	0.000103991
Lnc_000094	-2.39848	0.0249032	Solyc00g047190.1	-2.12127	1.44e-05	0.991953	9.68799e-05
Lnc_000094	-2.39848	0.0249032	Solyc00g052540.1	-1.61643	0.00133026	0.992476	8.47019e-05
Lnc_000094	-2.39848	0.0249032	Solyc00g068970.2	-1.38757	0.000376637	0.993856	5.65118e-05
Lnc_000094	-2.39848	0.0249032	Solyc00g164580.1	-1.46565	0.00903672	0.992581	8.23589e-05
Lnc_000094	-2.39848	0.0249032	Solyc00g181250.2	-1.2935	0.000572948	0.994664	4.26353e-05
Lnc_000094	-2.39848	0.0249032	Solyc00g281110.1	-2.15641	2.89e-05	0.991859	9.91508e-05
Lnc_000094	-2.39848	0.0249032	Solyc01g066910.3	-1.77955	0.0111404	0.992717	7.93622e-05
Lnc_000094	-2.39848	0.0249032	Solyc03g061655.1	-2.11154	0.000104374	0.99436	4.76224e-05
Lnc_000094	-2.39848	0.0249032	Solyc03g121900.1	-4.59619	7.53e-06	0.990674	0.000130053
Lnc_000094	-2.39848	0.0249032	Solyc05g010180.3	-1.01244	0.000568443	0.990596	0.000132241
Lnc_000094	-2.39848	0.0249032	Solyc05g021410.2	-3.04241	0.00246823	0.994533	4.47505e-05
Lnc_000094	-2.39848	0.0249032	Solyc06g005070.2	-1.78612	0.00119446	0.990178	0.000144238
Lnc_000094	-2.39848	0.0249032	Solyc07g019500.2	-1.02168	0.00757034	0.996335	2.01191e-05
Lnc_000094	-2.39848	0.0249032	Solyc07g065110.1	-1.72639	0.0187635	0.992555	8.29424e-05
Lnc_000094	-2.39848	0.0249032	Solyc08g068165.1	-1.16495	0.00359169	0.996643	1.68858e-05
Lnc_000094	-2.39848	0.0249032	Solyc08g068170.1	-1.16495	0.00359169	0.996643	1.68858e-05
Lnc_000094	-2.39848	0.0249032	Solyc09g015900.1	-1.58902	9.36e-05	0.994147	5.12844e-05
Lnc_000094	-2.39848	0.0249032	Solyc10g047030.3	-1.62734	0.0325773	0.992459	8.50775e-05
Lnc_000094	-2.39848	0.0249032	Solyc11g038340.1	-1.50293	0.00660232	0.992119	9.29147e-05
Lnc_000094	-2.39848	0.0249032	Solyc11g038350.1	-1.50293	0.00660232	0.992119	9.29147e-05
Lnc_000094	-2.39848	0.0249032	Solyc11g039350.1	-1.7181	0.0010507	0.990381	0.000138352
Lnc_000094	-2.39848	0.0249032	Solyc11g056280.1	-1.53279	0.0129714	0.998268	4.49786e-06
Lnc_000094	-2.39848	0.0249032	Solyc11g056637.1	-1.26858	0.00243683	0.997337	1.06251e-05
Lnc_000094	-2.39848	0.0249032	Solyc12g087940.2	-2.16116	0.00833103	0.992885	7.57451e-05
Lnc_000094	-2.39848	0.0249032	Solyc12g088640.2	-2.80595	5.29e-05	0.990793	0.00012675
Lnc_000098	-5.0841	0.00767562	Solyc00g007570.2	-1.38854	0.00940095	0.999981	5.23662e-10
Lnc_000098	-5.0841	0.00767562	Solyc00g013170.1	-2.99598	6.12e-06	0.996408	1.93258e-05
Lnc_000098	-5.0841	0.00767562	Solyc00g023580.1	-1.7389	0.000622086	0.997153	1.21468e-05
Lnc_000098	-5.0841	0.00767562	Solyc00g023590.2	-1.7389	0.000622086	0.997153	1.21468e-05
Lnc_000098	-5.0841	0.00767562	Solyc00g023600.2	-1.7389	0.000622086	0.997153	1.21468e-05
Lnc_000098	-5.0841	0.00767562	Solyc00g025300.1	-3.04606	0.0461195	0.992581	8.23687e-05
Lnc_000098	-5.0841	0.00767562	Solyc00g047190.1	-2.12127	1.44e-05	0.998435	3.67261e-06
Lnc_000098	-5.0841	0.00767562	Solyc00g049220.1	-1.18811	1.09e-05	0.990872	0.000124611
Lnc_000098	-5.0841	0.00767562	Solyc00g052540.1	-1.61643	0.00133026	0.997652	8.26373e-06
Lnc_000098	-5.0841	0.00767562	Solyc00g068970.2	-1.38757	0.000376637	0.99672	1.61171e-05
Lnc_000098	-5.0841	0.00767562	Solyc00g094540.1	-1.13728	0.000131723	0.99209	9.36091e-05
Lnc_000098	-5.0841	0.00767562	Solyc00g108550.1	-1.23613	0.00560474	0.99672	1.61165e-05
Lnc_000098	-5.0841	0.00767562	Solyc00g164580.1	-1.46565	0.00903672	0.998852	1.97456e-06
Lnc_000098	-5.0841	0.00767562	Solyc00g181250.2	-1.2935	0.000572948	0.997714	7.83425e-06
Lnc_000098	-5.0841	0.00767562	Solyc00g230060.2	-1.17002	0.0181582	0.995519	3.00769e-05
Lnc_000098	-5.0841	0.00767562	Solyc00g281110.1	-2.15641	2.89e-05	0.995612	2.88371e-05
Lnc_000098	-5.0841	0.00767562	Solyc01g005990.3	-2.00575	0.000716178	0.996484	1.85236e-05
Lnc_000098	-5.0841	0.00767562	Solyc01g066910.3	-1.77955	0.0111404	0.999386	5.65746e-07
Lnc_000098	-5.0841	0.00767562	Solyc01g096940.3	-1.48592	0.00305786	0.997902	6.6005e-06
Lnc_000098	-5.0841	0.00767562	Solyc01g109390.3	-1.42744	0.00853628	0.99916	1.05701e-06
Lnc_000098	-5.0841	0.00767562	Solyc02g069910.2	-1.46357	5.13e-06	0.991771	0.0001013
Lnc_000098	-5.0841	0.00767562	Solyc03g007690.1	-1.99353	5.87e-07	0.992477	8.46895e-05
Lnc_000098	-5.0841	0.00767562	Solyc03g019670.3	-1.16371	3.86e-05	0.991994	9.58822e-05
Lnc_000098	-5.0841	0.00767562	Solyc03g061655.1	-2.11154	0.000104374	0.996936	1.40715e-05
Lnc_000098	-5.0841	0.00767562	Solyc03g117690.3	-1.71706	6.34e-07	0.990485	0.000135382
Lnc_000098	-5.0841	0.00767562	Solyc03g119310.3	-1.12146	3.15e-07	0.992919	7.50376e-05
Lnc_000098	-5.0841	0.00767562	Solyc03g121900.1	-4.59619	7.53e-06	0.998591	2.97476e-06
Lnc_000098	-5.0841	0.00767562	Solyc04g009590.3	-1.19425	0.000330588	0.994728	4.16107e-05
Lnc_000098	-5.0841	0.00767562	Solyc04g011690.3	-1.41323	2.91e-06	0.990061	0.000147677
Lnc_000098	-5.0841	0.00767562	Solyc04g074810.3	-1.55567	8.19e-07	0.990903	0.000123768
Lnc_000098	-5.0841	0.00767562	Solyc05g010180.3	-1.01244	0.000568443	0.996658	1.67372e-05
Lnc_000098	-5.0841	0.00767562	Solyc05g015658.1	-1.44739	2.69e-05	0.996122	2.25249e-05
Lnc_000098	-5.0841	0.00767562	Solyc05g015680.2	-1.44739	2.69e-05	0.996122	2.25249e-05
Lnc_000098	-5.0841	0.00767562	Solyc05g021410.2	-3.04241	0.00246823	0.998324	4.21201e-06
Lnc_000098	-5.0841	0.00767562	Solyc05g041810.1	-1.03251	0.00170877	0.9973	1.09249e-05
Lnc_000098	-5.0841	0.00767562	Solyc06g005070.2	-1.78612	0.00119446	0.994871	3.93925e-05
Lnc_000098	-5.0841	0.00767562	Solyc06g024210.2	-1.12394	0.00227149	0.997159	1.20987e-05
Lnc_000098	-5.0841	0.00767562	Solyc06g035455.1	-1.99128	0.000437665	0.990535	0.000133958
Lnc_000098	-5.0841	0.00767562	Solyc06g035480.3	-1.99128	0.000437665	0.990535	0.000133958
Lnc_000098	-5.0841	0.00767562	Solyc06g066750.3	-1.26553	0.00750265	0.998319	4.23768e-06
Lnc_000098	-5.0841	0.00767562	Solyc06g066760.3	-1.26553	0.00750265	0.998319	4.23768e-06
Lnc_000098	-5.0841	0.00767562	Solyc06g068550.3	-2.42329	4.06e-12	0.991056	0.000119633
Lnc_000098	-5.0841	0.00767562	Solyc07g007860.1	-1.37229	0.000322839	0.996612	1.72001e-05
Lnc_000098	-5.0841	0.00767562	Solyc07g019500.2	-1.02168	0.00757034	0.994198	5.04006e-05
Lnc_000098	-5.0841	0.00767562	Solyc07g065110.1	-1.72639	0.0187635	0.998929	1.71853e-06
Lnc_000098	-5.0841	0.00767562	Solyc08g045880.1	-1.74279	0.000788482	0.99607	2.31314e-05
Lnc_000098	-5.0841	0.00767562	Solyc08g061160.2	-1.43946	0.000270054	0.998524	3.26545e-06
Lnc_000098	-5.0841	0.00767562	Solyc08g066365.1	-1.49882	0.00722341	0.997192	1.18176e-05
Lnc_000098	-5.0841	0.00767562	Solyc08g066370.2	-1.49882	0.00722341	0.997192	1.18176e-05
Lnc_000098	-5.0841	0.00767562	Solyc08g068165.1	-1.16495	0.00359169	0.996696	1.63563e-05
Lnc_000098	-5.0841	0.00767562	Solyc08g068170.1	-1.16495	0.00359169	0.996696	1.63563e-05
Lnc_000098	-5.0841	0.00767562	Solyc08g078890.2	-2.60336	0.000280741	0.99773	7.72472e-06
Lnc_000098	-5.0841	0.00767562	Solyc08g078900.1	-2.1788	0.00073895	0.996446	1.8919e-05
Lnc_000098	-5.0841	0.00767562	Solyc08g078940.1	-2.60336	0.000280741	0.99773	7.72472e-06
Lnc_000098	-5.0841	0.00767562	Solyc09g015900.1	-1.58902	9.36e-05	0.996572	1.76084e-05
Lnc_000098	-5.0841	0.00767562	Solyc09g072700.3	-2.78741	0.000228748	0.997512	9.27586e-06
Lnc_000098	-5.0841	0.00767562	Solyc10g006800.3	-1.0543	5.88e-05	0.991527	0.000107375
Lnc_000098	-5.0841	0.00767562	Solyc10g047030.3	-1.62734	0.0325773	0.99744	9.82041e-06
Lnc_000098	-5.0841	0.00767562	Solyc10g048060.1	-1.08124	0.000178412	0.991276	0.000113837
Lnc_000098	-5.0841	0.00767562	Solyc10g050440.2	-1.00195	0.000273063	0.991212	0.000115506
Lnc_000098	-5.0841	0.00767562	Solyc11g038340.1	-1.50293	0.00660232	0.998465	3.5307e-06
Lnc_000098	-5.0841	0.00767562	Solyc11g038350.1	-1.50293	0.00660232	0.998465	3.5307e-06
Lnc_000098	-5.0841	0.00767562	Solyc11g039350.1	-1.7181	0.0010507	0.999022	1.43461e-06
Lnc_000098	-5.0841	0.00767562	Solyc11g039370.2	-1.45538	0.00152891	0.997976	6.14357e-06
Lnc_000098	-5.0841	0.00767562	Solyc11g039380.1	-1.12467	0.00542913	0.997237	1.14395e-05
Lnc_000098	-5.0841	0.00767562	Solyc11g056260.1	-1.66481	0.0227025	0.996769	1.56411e-05
Lnc_000098	-5.0841	0.00767562	Solyc11g056637.1	-1.26858	0.00243683	0.994594	4.37575e-05
Lnc_000098	-5.0841	0.00767562	Solyc11g061700.2	-1.74605	3.17e-12	0.998432	3.68688e-06
Lnc_000098	-5.0841	0.00767562	Solyc11g063570.1	-1.33761	0.00330413	0.998327	4.19851e-06
Lnc_000098	-5.0841	0.00767562	Solyc11g063580.2	-1.19662	8.58e-05	0.997147	1.21999e-05
Lnc_000098	-5.0841	0.00767562	Solyc12g007160.2	-2.07733	0.000207147	0.993428	6.46375e-05
Lnc_000098	-5.0841	0.00767562	Solyc12g014620.2	-3.11596	1.27e-13	0.991798	0.000100624
Lnc_000098	-5.0841	0.00767562	Solyc12g014630.1	-3.11596	1.27e-13	0.991798	0.000100624
Lnc_000098	-5.0841	0.00767562	Solyc12g087940.2	-2.16116	0.00833103	0.9992	9.58638e-07
Lnc_000098	-5.0841	0.00767562	Solyc12g088640.2	-2.80595	5.29e-05	0.999035	1.39535e-06
Lnc_000103	-1.693	0.00358267	Solyc00g013150.1	-1.99157	1.44e-06	0.991834	9.97428e-05
Lnc_000103	-1.693	0.00358267	Solyc00g023700.2	-1.02503	2.44e-05	0.992183	9.1417e-05
Lnc_000103	-1.693	0.00358267	Solyc00g023710.1	-1.00564	5.58e-06	0.99504	3.68407e-05
Lnc_000103	-1.693	0.00358267	Solyc00g049220.1	-1.18811	1.09e-05	0.991826	9.9946e-05
Lnc_000103	-1.693	0.00358267	Solyc00g069880.2	-1.08627	9.24e-06	0.996036	2.35388e-05
Lnc_000103	-1.693	0.00358267	Solyc01g068130.3	-2.70185	1.87e-23	0.995008	3.73219e-05
Lnc_000103	-1.693	0.00358267	Solyc01g079790.3	-1.34829	2.1e-11	0.994903	3.89058e-05
Lnc_000103	-1.693	0.00358267	Solyc01g095450.3	-2.58519	3.24e-22	0.998508	3.3388e-06
Lnc_000103	-1.693	0.00358267	Solyc01g098720.3	-1.85437	8.39e-09	0.996188	2.17689e-05
Lnc_000103	-1.693	0.00358267	Solyc01g105030.3	-1.00253	6.47e-08	0.997362	1.04283e-05
Lnc_000103	-1.693	0.00358267	Solyc01g105050.3	-1.00253	6.47e-08	0.997362	1.04283e-05
Lnc_000103	-1.693	0.00358267	Solyc02g063380.1	-1.8234	1.18e-05	0.994544	4.45704e-05
Lnc_000103	-1.693	0.00358267	Solyc02g065470.1	-2.25259	4.66e-06	0.996823	1.51216e-05
Lnc_000103	-1.693	0.00358267	Solyc02g068070.3	-2.09311	8.88e-14	0.998805	2.14012e-06
Lnc_000103	-1.693	0.00358267	Solyc02g079950.3	-1.16991	2.89e-09	0.99715	1.21743e-05
Lnc_000103	-1.693	0.00358267	Solyc02g081270.3	-1.38327	2.08e-09	0.998387	3.89817e-06
Lnc_000103	-1.693	0.00358267	Solyc02g087970.1	-1.58539	7.05e-11	0.990892	0.000124057
Lnc_000103	-1.693	0.00358267	Solyc02g090100.1	-1.64842	9.52e-07	0.997321	1.07547e-05
Lnc_000103	-1.693	0.00358267	Solyc02g091690.3	-2.71701	7.67e-15	0.99805	5.70115e-06
Lnc_000103	-1.693	0.00358267	Solyc02g094330.3	-1.78293	1.62e-05	0.994895	3.9022e-05
Lnc_000103	-1.693	0.00358267	Solyc03g006050.3	-1.0387	5.42e-09	0.990093	0.000146736
Lnc_000103	-1.693	0.00358267	Solyc03g007060.3	-1.25612	6.29e-11	0.992978	7.37986e-05
Lnc_000103	-1.693	0.00358267	Solyc03g007200.2	-1.48642	2.87e-11	0.996488	1.84784e-05
Lnc_000103	-1.693	0.00358267	Solyc03g019670.3	-1.16371	3.86e-05	0.990175	0.000144314
Lnc_000103	-1.693	0.00358267	Solyc03g031860.3	-1.25896	3.05e-07	0.998255	4.56462e-06
Lnc_000103	-1.693	0.00358267	Solyc03g083730.1	-1.88594	6.83e-15	0.99404	5.3176e-05
Lnc_000103	-1.693	0.00358267	Solyc03g083770.1	-1.68199	1.25e-08	0.998463	3.5426e-06
Lnc_000103	-1.693	0.00358267	Solyc03g117690.3	-1.71706	6.34e-07	0.991845	9.94968e-05
Lnc_000103	-1.693	0.00358267	Solyc03g119080.4	-1.41859	5.61e-08	0.998301	4.32523e-06
Lnc_000103	-1.693	0.00358267	Solyc04g009020.3	-1.29046	3.5e-08	0.998841	2.01549e-06
Lnc_000103	-1.693	0.00358267	Solyc04g040160.3	-1.69418	4.54e-12	0.994148	5.12667e-05
Lnc_000103	-1.693	0.00358267	Solyc04g050930.3	-1.82484	4.22e-12	0.996224	2.13637e-05
Lnc_000103	-1.693	0.00358267	Solyc04g074810.3	-1.55567	8.19e-07	0.991564	0.000106453
Lnc_000103	-1.693	0.00358267	Solyc04g076190.1	-4.56104	1.68e-14	0.997131	1.23339e-05
Lnc_000103	-1.693	0.00358267	Solyc04g078470.3	-2.28455	1.14e-17	0.996852	1.48532e-05
Lnc_000103	-1.693	0.00358267	Solyc04g081870.3	-1.00403	6.64e-06	0.997186	1.18699e-05
Lnc_000103	-1.693	0.00358267	Solyc05g007830.3	-3.52625	2.88e-19	0.996698	1.63397e-05
Lnc_000103	-1.693	0.00358267	Solyc05g009040.3	-1.49622	9.14e-07	0.991796	0.000100672
Lnc_000103	-1.693	0.00358267	Solyc05g009570.3	-2.05602	2.15e-08	0.996507	1.82779e-05
Lnc_000103	-1.693	0.00358267	Solyc05g013510.3	-1.50996	1.2e-12	0.993226	6.86683e-05
Lnc_000103	-1.693	0.00358267	Solyc05g013690.3	-1.62002	8.87e-12	0.994604	4.35934e-05
Lnc_000103	-1.693	0.00358267	Solyc05g025600.1	-1.02978	3.26e-08	0.997263	1.12245e-05
Lnc_000103	-1.693	0.00358267	Solyc05g050110.3	-1.13339	2.65e-07	0.994895	3.90206e-05
Lnc_000103	-1.693	0.00358267	Solyc06g007890.3	-1.01234	5.25e-07	0.995073	3.63574e-05
Lnc_000103	-1.693	0.00358267	Solyc06g007910.3	-1.01234	5.25e-07	0.995073	3.63574e-05
Lnc_000103	-1.693	0.00358267	Solyc06g068550.3	-2.42329	4.06e-12	0.991947	9.7023e-05
Lnc_000103	-1.693	0.00358267	Solyc06g073760.3	-1.04187	1.94e-08	0.992964	7.4094e-05
Lnc_000103	-1.693	0.00358267	Solyc06g074190.3	-1.62683	2.57e-15	0.992423	8.59025e-05
Lnc_000103	-1.693	0.00358267	Solyc06g074200.3	-1.62683	2.57e-15	0.992423	8.59025e-05
Lnc_000103	-1.693	0.00358267	Solyc06g084470.3	-1.23212	3.89e-06	0.990941	0.000122728
Lnc_000103	-1.693	0.00358267	Solyc07g005190.3	-1.60656	3.72e-09	0.999579	2.65894e-07
Lnc_000103	-1.693	0.00358267	Solyc07g043000.3	-2.77606	1.49e-24	0.995799	2.64327e-05
Lnc_000103	-1.693	0.00358267	Solyc07g061790.3	-1.20974	2.64e-06	0.997352	1.05056e-05
Lnc_000103	-1.693	0.00358267	Solyc07g062545.1	-1.32086	3.56e-12	0.99426	4.93269e-05
Lnc_000103	-1.693	0.00358267	Solyc07g062550.3	-1.32086	3.56e-12	0.99426	4.93269e-05
Lnc_000103	-1.693	0.00358267	Solyc07g063720.1	-1.15638	1.47e-07	0.997963	6.21888e-06
Lnc_000103	-1.693	0.00358267	Solyc07g063730.2	-1.15638	1.47e-07	0.997963	6.21888e-06
Lnc_000103	-1.693	0.00358267	Solyc07g064500.3	-1.47799	2.45e-13	0.992252	8.98128e-05
Lnc_000103	-1.693	0.00358267	Solyc08g008630.3	-1.1728	5.34e-08	0.992982	7.37063e-05
Lnc_000103	-1.693	0.00358267	Solyc08g074480.1	-3.19365	1.29e-14	0.998611	2.89114e-06
Lnc_000103	-1.693	0.00358267	Solyc08g077110.3	-2.50794	3.37e-09	0.999433	4.82628e-07
Lnc_000103	-1.693	0.00358267	Solyc08g078870.2	-2.46848	3.69e-10	0.999245	8.54577e-07
Lnc_000103	-1.693	0.00358267	Solyc08g079180.3	-1.05892	1.62e-06	0.997142	1.22368e-05
Lnc_000103	-1.693	0.00358267	Solyc08g079240.3	-1.12591	2.17e-06	0.996458	1.87999e-05
Lnc_000103	-1.693	0.00358267	Solyc08g080050.3	-1.20953	3.86e-08	0.996432	1.90701e-05
Lnc_000103	-1.693	0.00358267	Solyc08g083210.3	-1.83595	7.06e-13	0.998924	1.73468e-06
Lnc_000103	-1.693	0.00358267	Solyc08g083215.1	-1.83595	7.06e-13	0.998924	1.73468e-06
Lnc_000103	-1.693	0.00358267	Solyc09g014870.1	-1.23011	3.5e-05	0.990007	0.000149305
Lnc_000103	-1.693	0.00358267	Solyc09g059170.2	-3.64325	1.25e-41	0.99274	7.88667e-05
Lnc_000103	-1.693	0.00358267	Solyc09g064500.3	-1.34827	3.16e-07	0.996951	1.39312e-05
Lnc_000103	-1.693	0.00358267	Solyc09g082080.1	-1.23924	0.000224663	0.992092	9.35574e-05
Lnc_000103	-1.693	0.00358267	Solyc09g082690.3	-1.57262	3.55e-05	0.996561	1.77226e-05
Lnc_000103	-1.693	0.00358267	Solyc09g082695.1	-1.57262	3.55e-05	0.996561	1.77226e-05
Lnc_000103	-1.693	0.00358267	Solyc09g082700.2	-1.57262	3.55e-05	0.996561	1.77226e-05
Lnc_000103	-1.693	0.00358267	Solyc09g090570.2	-1.2075	4.89e-06	0.99834	4.13272e-06
Lnc_000103	-1.693	0.00358267	Solyc09g098290.3	-1.51079	6.83e-08	0.994994	3.75241e-05
Lnc_000103	-1.693	0.00358267	Solyc10g005620.3	-1.42087	2.77e-10	0.998676	2.62724e-06
Lnc_000103	-1.693	0.00358267	Solyc10g007670.3	-1.31093	1.69e-05	0.995012	3.72616e-05
Lnc_000103	-1.693	0.00358267	Solyc10g007690.3	-1.08576	5.17e-08	0.998945	1.67033e-06
Lnc_000103	-1.693	0.00358267	Solyc10g018300.2	-1.27006	6.12e-08	0.9984	3.83653e-06
Lnc_000103	-1.693	0.00358267	Solyc10g044520.2	-1.18433	1e-10	0.993744	5.85805e-05
Lnc_000103	-1.693	0.00358267	Solyc10g050110.1	-2.38857	1.13e-21	0.992029	9.50509e-05
Lnc_000103	-1.693	0.00358267	Solyc10g055390.2	-1.11568	1.6e-06	0.998966	1.6029e-06
Lnc_000103	-1.693	0.00358267	Solyc11g005820.1	-1.11916	3.15e-05	0.993077	7.17214e-05
Lnc_000103	-1.693	0.00358267	Solyc11g066940.2	-1.93474	2.25e-14	0.991867	9.89603e-05
Lnc_000103	-1.693	0.00358267	Solyc11g066950.2	-3.9409	1.96e-35	0.994571	4.41382e-05
Lnc_000103	-1.693	0.00358267	Solyc11g072080.1	-1.37947	4.82e-06	0.995225	3.41408e-05
Lnc_000103	-1.693	0.00358267	Solyc11g072110.2	-1.39925	4.38e-10	0.994594	4.37636e-05
Lnc_000103	-1.693	0.00358267	Solyc12g005240.1	-1.17038	1.15e-08	0.992732	7.90528e-05
Lnc_000103	-1.693	0.00358267	Solyc12g005630.2	-1.3757	4.95e-09	0.998744	2.36603e-06
Lnc_000103	-1.693	0.00358267	Solyc12g008980.2	-1.24327	1.23e-07	0.998314	4.26069e-06
Lnc_000103	-1.693	0.00358267	Solyc12g009417.1	-1.31328	1.51e-06	0.993065	7.19777e-05
Lnc_000103	-1.693	0.00358267	Solyc12g009650.2	-2.88658	1.68e-13	0.993128	7.06807e-05
Lnc_000103	-1.693	0.00358267	Solyc12g010320.2	-1.53274	1.1e-09	0.998475	3.48822e-06
Lnc_000103	-1.693	0.00358267	Solyc12g014395.1	-1.06233	1.36e-06	0.991565	0.000106424
Lnc_000103	-1.693	0.00358267	Solyc12g014620.2	-3.11596	1.27e-13	0.990635	0.000131143
Lnc_000103	-1.693	0.00358267	Solyc12g014630.1	-3.11596	1.27e-13	0.990635	0.000131143
Lnc_000103	-1.693	0.00358267	Solyc12g019550.2	-1.33983	3.33e-10	0.991694	0.000103205
Lnc_000103	-1.693	0.00358267	Solyc12g055970.2	-3.10698	1.17e-11	0.999101	1.21165e-06
Lnc_000103	-1.693	0.00358267	Solyc12g056390.1	-1.25303	5.72e-12	0.991174	0.000116512
Lnc_000103	-1.693	0.00358267	Solyc12g096900.2	-1.72643	6.13e-13	0.9957	2.76952e-05
Lnc_000154	-3.84405	0.00150117	Solyc00g007570.2	-1.38854	0.00940095	0.992709	7.95488e-05
Lnc_000154	-3.84405	0.00150117	Solyc00g013170.1	-2.99598	6.12e-06	0.99883	2.05287e-06
Lnc_000154	-3.84405	0.00150117	Solyc00g023580.1	-1.7389	0.000622086	0.992849	7.65201e-05
Lnc_000154	-3.84405	0.00150117	Solyc00g023590.2	-1.7389	0.000622086	0.992849	7.65201e-05
Lnc_000154	-3.84405	0.00150117	Solyc00g023600.2	-1.7389	0.000622086	0.992849	7.65201e-05
Lnc_000154	-3.84405	0.00150117	Solyc00g047190.1	-2.12127	1.44e-05	0.994234	4.97753e-05
Lnc_000154	-3.84405	0.00150117	Solyc00g052540.1	-1.61643	0.00133026	0.993848	5.66608e-05
Lnc_000154	-3.84405	0.00150117	Solyc00g068970.2	-1.38757	0.000376637	0.9971	1.26024e-05
Lnc_000154	-3.84405	0.00150117	Solyc00g094540.1	-1.13728	0.000131723	0.993011	7.3108e-05
Lnc_000154	-3.84405	0.00150117	Solyc00g108550.1	-1.23613	0.00560474	0.994313	4.84279e-05
Lnc_000154	-3.84405	0.00150117	Solyc00g164580.1	-1.46565	0.00903672	0.996245	2.11233e-05
Lnc_000154	-3.84405	0.00150117	Solyc00g181250.2	-1.2935	0.000572948	0.993278	6.76282e-05
Lnc_000154	-3.84405	0.00150117	Solyc00g281110.1	-2.15641	2.89e-05	0.991963	9.66251e-05
Lnc_000154	-3.84405	0.00150117	Solyc01g005990.3	-2.00575	0.000716178	0.993634	6.06603e-05
Lnc_000154	-3.84405	0.00150117	Solyc01g066910.3	-1.77955	0.0111404	0.994283	4.89373e-05
Lnc_000154	-3.84405	0.00150117	Solyc01g096940.3	-1.48592	0.00305786	0.992788	7.7822e-05
Lnc_000154	-3.84405	0.00150117	Solyc01g109390.3	-1.42744	0.00853628	0.991892	9.83314e-05
Lnc_000154	-3.84405	0.00150117	Solyc03g061655.1	-2.11154	0.000104374	0.991986	9.60855e-05
Lnc_000154	-3.84405	0.00150117	Solyc03g121900.1	-4.59619	7.53e-06	0.994117	5.18159e-05
Lnc_000154	-3.84405	0.00150117	Solyc05g010180.3	-1.01244	0.000568443	0.997035	1.31736e-05
Lnc_000154	-3.84405	0.00150117	Solyc05g015658.1	-1.44739	2.69e-05	0.993452	6.41776e-05
Lnc_000154	-3.84405	0.00150117	Solyc05g015680.2	-1.44739	2.69e-05	0.993452	6.41776e-05
Lnc_000154	-3.84405	0.00150117	Solyc05g021410.2	-3.04241	0.00246823	0.994757	4.11551e-05
Lnc_000154	-3.84405	0.00150117	Solyc05g041810.1	-1.03251	0.00170877	0.994241	4.96502e-05
Lnc_000154	-3.84405	0.00150117	Solyc05g041900.1	-1.38531	0.0137901	0.995588	2.9161e-05
Lnc_000154	-3.84405	0.00150117	Solyc06g005070.2	-1.78612	0.00119446	0.991719	0.000102589
Lnc_000154	-3.84405	0.00150117	Solyc06g024210.2	-1.12394	0.00227149	0.996352	1.99361e-05
Lnc_000154	-3.84405	0.00150117	Solyc06g066750.3	-1.26553	0.00750265	0.994835	3.99394e-05
Lnc_000154	-3.84405	0.00150117	Solyc06g066760.3	-1.26553	0.00750265	0.994835	3.99394e-05
Lnc_000154	-3.84405	0.00150117	Solyc07g019500.2	-1.02168	0.00757034	0.993861	5.64063e-05
Lnc_000154	-3.84405	0.00150117	Solyc07g065110.1	-1.72639	0.0187635	0.992401	8.6392e-05
Lnc_000154	-3.84405	0.00150117	Solyc08g045880.1	-1.74279	0.000788482	0.997824	7.09412e-06
Lnc_000154	-3.84405	0.00150117	Solyc08g061160.2	-1.43946	0.000270054	0.997055	1.29964e-05
Lnc_000154	-3.84405	0.00150117	Solyc08g068165.1	-1.16495	0.00359169	0.991392	0.000110829
Lnc_000154	-3.84405	0.00150117	Solyc08g068170.1	-1.16495	0.00359169	0.991392	0.000110829
Lnc_000154	-3.84405	0.00150117	Solyc08g078890.2	-2.60336	0.000280741	0.99551	3.01896e-05
Lnc_000154	-3.84405	0.00150117	Solyc08g078900.1	-2.1788	0.00073895	0.991986	9.60761e-05
Lnc_000154	-3.84405	0.00150117	Solyc08g078940.1	-2.60336	0.000280741	0.99551	3.01896e-05
Lnc_000154	-3.84405	0.00150117	Solyc09g072700.3	-2.78741	0.000228748	0.993406	6.50812e-05
Lnc_000154	-3.84405	0.00150117	Solyc10g047030.3	-1.62734	0.0325773	0.992213	9.07164e-05
Lnc_000154	-3.84405	0.00150117	Solyc10g050440.2	-1.00195	0.000273063	0.992105	9.326e-05
Lnc_000154	-3.84405	0.00150117	Solyc11g038340.1	-1.50293	0.00660232	0.997293	1.09786e-05
Lnc_000154	-3.84405	0.00150117	Solyc11g038350.1	-1.50293	0.00660232	0.997293	1.09786e-05
Lnc_000154	-3.84405	0.00150117	Solyc11g039350.1	-1.7181	0.0010507	0.996867	1.47071e-05
Lnc_000154	-3.84405	0.00150117	Solyc11g039370.2	-1.45538	0.00152891	0.994177	5.0768e-05
Lnc_000154	-3.84405	0.00150117	Solyc11g039380.1	-1.12467	0.00542913	0.992341	8.77681e-05
Lnc_000154	-3.84405	0.00150117	Solyc11g056260.1	-1.66481	0.0227025	0.992476	8.47111e-05
Lnc_000154	-3.84405	0.00150117	Solyc11g056280.1	-1.53279	0.0129714	0.990236	0.00014254
Lnc_000154	-3.84405	0.00150117	Solyc11g056637.1	-1.26858	0.00243683	0.992656	8.07055e-05
Lnc_000154	-3.84405	0.00150117	Solyc11g061700.2	-1.74605	3.17e-12	0.995023	3.70897e-05
Lnc_000154	-3.84405	0.00150117	Solyc11g063570.1	-1.33761	0.00330413	0.993427	6.46732e-05
Lnc_000154	-3.84405	0.00150117	Solyc11g063580.2	-1.19662	8.58e-05	0.993418	6.48413e-05
Lnc_000154	-3.84405	0.00150117	Solyc12g087940.2	-2.16116	0.00833103	0.994294	4.87447e-05
Lnc_000154	-3.84405	0.00150117	Solyc12g088640.2	-2.80595	5.29e-05	0.99316	7.002e-05
Lnc_000162	-5.15626	0.014198	Solyc00g075035.1	-1.04392	3.06e-07	0.997605	8.59996e-06
Lnc_000162	-5.15626	0.014198	Solyc01g006060.3	-1.48211	5.45e-08	0.993559	6.20888e-05
Lnc_000162	-5.15626	0.014198	Solyc01g006300.3	-2.53916	3.8e-29	0.992126	9.27543e-05
Lnc_000162	-5.15626	0.014198	Solyc01g007000.3	-2.94484	1.24e-29	0.997662	8.19619e-06
Lnc_000162	-5.15626	0.014198	Solyc01g007010.2	-2.94484	1.24e-29	0.997662	8.19619e-06
Lnc_000162	-5.15626	0.014198	Solyc01g007020.3	-2.86279	5.82e-34	0.995145	3.53057e-05
Lnc_000162	-5.15626	0.014198	Solyc01g007025.1	-2.86279	5.82e-34	0.995145	3.53057e-05
Lnc_000162	-5.15626	0.014198	Solyc01g007030.3	-2.86279	5.82e-34	0.995145	3.53057e-05
Lnc_000162	-5.15626	0.014198	Solyc01g007040.3	-2.86279	5.82e-34	0.995145	3.53057e-05
Lnc_000162	-5.15626	0.014198	Solyc01g008620.3	-2.42119	1.8e-15	0.999053	1.34488e-06
Lnc_000162	-5.15626	0.014198	Solyc01g066430.3	-1.2195	4.56e-13	0.995083	3.62099e-05
Lnc_000162	-5.15626	0.014198	Solyc01g067440.3	-3.93401	1.69e-38	0.9918	0.000100581
Lnc_000162	-5.15626	0.014198	Solyc01g067460.2	-3.16537	2.93e-15	0.993135	7.05345e-05
Lnc_000162	-5.15626	0.014198	Solyc01g073820.3	-1.4922	8.02e-12	0.994838	3.99016e-05
Lnc_000162	-5.15626	0.014198	Solyc01g079530.3	-1.27083	4.95e-14	0.99365	6.03468e-05
Lnc_000162	-5.15626	0.014198	Solyc01g079570.3	-1.38623	3.92e-12	0.997517	9.24332e-06
Lnc_000162	-5.15626	0.014198	Solyc01g079740.3	-1.23243	1.38e-08	0.992019	9.52855e-05
Lnc_000162	-5.15626	0.014198	Solyc01g081620.3	-1.05747	1.58e-06	0.992318	8.82838e-05
Lnc_000162	-5.15626	0.014198	Solyc01g090300.2	-3.12711	2.84e-23	0.993355	6.60807e-05
Lnc_000162	-5.15626	0.014198	Solyc01g090310.2	-2.37533	8.68e-13	0.993788	5.77569e-05
Lnc_000162	-5.15626	0.014198	Solyc01g091490.3	-1.1157	2.92e-07	0.997675	8.09886e-06
Lnc_000162	-5.15626	0.014198	Solyc01g098110.3	-1.01145	4.5e-09	0.998247	4.60891e-06
Lnc_000162	-5.15626	0.014198	Solyc01g098680.2	-1.13211	5.83e-07	0.99153	0.000107303
Lnc_000162	-5.15626	0.014198	Solyc01g098690.2	-1.13211	5.83e-07	0.99153	0.000107303
Lnc_000162	-5.15626	0.014198	Solyc01g101070.3	-1.00737	5.02e-10	0.998795	2.1777e-06
Lnc_000162	-5.15626	0.014198	Solyc01g102380.4	-1.25107	1.48e-08	0.996647	1.68455e-05
Lnc_000162	-5.15626	0.014198	Solyc01g107980.3	-1.11488	3e-09	0.996662	1.66987e-05
Lnc_000162	-5.15626	0.014198	Solyc01g108240.3	-5.24612	1.23e-38	0.998691	2.56758e-06
Lnc_000162	-5.15626	0.014198	Solyc01g109250.2	-1.66983	1.03e-19	0.990348	0.000139299
Lnc_000162	-5.15626	0.014198	Solyc01g110800.3	-1.4625	1.25e-10	0.990118	0.000145995
Lnc_000162	-5.15626	0.014198	Solyc01g112000.3	-1.04833	9.16e-12	0.997159	1.20944e-05
Lnc_000162	-5.15626	0.014198	Solyc02g014300.2	-1.71153	5.92e-14	0.996183	2.18267e-05
Lnc_000162	-5.15626	0.014198	Solyc02g062190.2	-1.50573	9.07e-13	0.991706	0.000102895
Lnc_000162	-5.15626	0.014198	Solyc02g071000.1	-1.25267	1.32e-06	0.993239	6.8411e-05
Lnc_000162	-5.15626	0.014198	Solyc02g071070.3	-1.72889	6.6e-17	0.996066	2.31887e-05
Lnc_000162	-5.15626	0.014198	Solyc02g071620.3	-3.78072	7.54e-47	0.999177	1.01682e-06
Lnc_000162	-5.15626	0.014198	Solyc02g072210.1	-1.50215	5.56e-12	0.998254	4.56958e-06
Lnc_000162	-5.15626	0.014198	Solyc02g072220.1	-1.50215	5.56e-12	0.998254	4.56958e-06
Lnc_000162	-5.15626	0.014198	Solyc02g076980.4	-2.48422	6.46e-23	0.996262	2.09358e-05
Lnc_000162	-5.15626	0.014198	Solyc02g077020.3	-2.51715	1.87e-24	0.995472	3.07067e-05
Lnc_000162	-5.15626	0.014198	Solyc02g077060.2	-1.28868	6.06e-07	0.992773	7.81622e-05
Lnc_000162	-5.15626	0.014198	Solyc02g077710.1	-1.16522	1.15e-14	0.994036	5.32525e-05
Lnc_000162	-5.15626	0.014198	Solyc02g077840.1	-1.36821	7.95e-09	0.997133	1.23212e-05
Lnc_000162	-5.15626	0.014198	Solyc02g078690.2	-1.47684	2.6e-09	0.993337	6.64481e-05
Lnc_000162	-5.15626	0.014198	Solyc02g079360.2	-2.29623	1.48e-28	0.992796	7.76567e-05
Lnc_000162	-5.15626	0.014198	Solyc02g080200.3	-1.62063	2.14e-20	0.993322	6.67413e-05
Lnc_000162	-5.15626	0.014198	Solyc02g080210.3	-1.62063	2.14e-20	0.993322	6.67413e-05
Lnc_000162	-5.15626	0.014198	Solyc02g080410.3	-1.56417	2.83e-19	0.995787	2.65836e-05
Lnc_000162	-5.15626	0.014198	Solyc02g082880.2	-2.7515	1.79e-11	0.998762	2.29725e-06
Lnc_000162	-5.15626	0.014198	Solyc02g082960.3	-1.22504	3.33e-12	0.997776	7.41299e-06
Lnc_000162	-5.15626	0.014198	Solyc02g083040.1	-1.40039	5.2e-09	0.999708	1.27461e-07
Lnc_000162	-5.15626	0.014198	Solyc02g087440.3	-1.82314	1.85e-14	0.993119	7.08677e-05
Lnc_000162	-5.15626	0.014198	Solyc02g087540.2	-1.32057	6.25e-13	0.997219	1.15874e-05
Lnc_000162	-5.15626	0.014198	Solyc02g087860.3	-1.82441	2.01e-06	0.999252	8.38475e-07
Lnc_000162	-5.15626	0.014198	Solyc02g088320.3	-1.36025	2.85e-12	0.994968	3.79135e-05
Lnc_000162	-5.15626	0.014198	Solyc02g088325.1	-1.36025	2.85e-12	0.994968	3.79135e-05
Lnc_000162	-5.15626	0.014198	Solyc02g091820.2	-2.84972	1.65e-40	0.996253	2.10356e-05
Lnc_000162	-5.15626	0.014198	Solyc02g091920.3	-1.82234	1.6e-14	0.995813	2.62624e-05
Lnc_000162	-5.15626	0.014198	Solyc02g092100.1	-1.371	0.000225964	0.991655	0.000104159
Lnc_000162	-5.15626	0.014198	Solyc02g092720.1	-1.13583	7.98e-10	0.995524	3.00046e-05
Lnc_000162	-5.15626	0.014198	Solyc02g094000.1	-1.31811	1.79e-10	0.997883	6.71713e-06
Lnc_000162	-5.15626	0.014198	Solyc03g005020.3	-1.2735	4.86e-13	0.993699	5.94349e-05
Lnc_000162	-5.15626	0.014198	Solyc03g005570.3	-2.13524	1.54e-15	0.995675	2.80159e-05
Lnc_000162	-5.15626	0.014198	Solyc03g006210.2	-1.01007	2.21e-05	0.993088	7.14929e-05
Lnc_000162	-5.15626	0.014198	Solyc03g006250.2	-1.51668	4.62e-18	0.993963	5.45655e-05
Lnc_000162	-5.15626	0.014198	Solyc03g013340.3	-1.3292	1.53e-13	0.995043	3.67901e-05
Lnc_000162	-5.15626	0.014198	Solyc03g025320.3	-2.43835	9.64e-17	0.99388	5.60751e-05
Lnc_000162	-5.15626	0.014198	Solyc03g025380.3	-3.19857	2.16e-25	0.999151	1.0799e-06
Lnc_000162	-5.15626	0.014198	Solyc03g025790.3	-1.80977	6.17e-08	0.995132	3.54914e-05
Lnc_000162	-5.15626	0.014198	Solyc03g026000.3	-1.07152	1.46e-06	0.997025	1.326e-05
Lnc_000162	-5.15626	0.014198	Solyc03g026280.3	-3.91085	1.55e-52	0.992985	7.36351e-05
Lnc_000162	-5.15626	0.014198	Solyc03g031590.3	-1.55286	4.36e-09	0.990215	0.000143139
Lnc_000162	-5.15626	0.014198	Solyc03g033330.3	1.18843	0.0435894	-0.992606	8.18122e-05
Lnc_000162	-5.15626	0.014198	Solyc03g059080.2	-1.00271	1.47e-10	0.993607	6.11728e-05
Lnc_000162	-5.15626	0.014198	Solyc03g071870.1	-2.08904	5.48e-08	0.992718	7.93513e-05
Lnc_000162	-5.15626	0.014198	Solyc03g083010.3	-1.09972	5.62e-14	0.99254	8.32624e-05
Lnc_000162	-5.15626	0.014198	Solyc03g083680.1	-1.18379	1.98e-07	0.994415	4.67084e-05
Lnc_000162	-5.15626	0.014198	Solyc03g093560.1	-1.45688	1.62e-15	0.995365	3.21681e-05
Lnc_000162	-5.15626	0.014198	Solyc03g093610.1	-2.10988	7.07e-23	0.995779	2.66844e-05
Lnc_000162	-5.15626	0.014198	Solyc03g095770.3	-1.21174	3.07e-09	0.998242	4.63056e-06
Lnc_000162	-5.15626	0.014198	Solyc03g095780.2	-2.92578	1.77e-24	0.998449	3.60614e-06
Lnc_000162	-5.15626	0.014198	Solyc03g098720.3	-1.35977	3.84e-07	0.992508	8.39927e-05
Lnc_000162	-5.15626	0.014198	Solyc03g111300.1	-1.65091	4.17e-16	0.997316	1.07952e-05
Lnc_000162	-5.15626	0.014198	Solyc03g111880.3	-1.32545	1.37e-15	0.990866	0.000124768
Lnc_000162	-5.15626	0.014198	Solyc03g114130.1	-1.33344	3.83e-11	0.994388	4.71505e-05
Lnc_000162	-5.15626	0.014198	Solyc03g114240.3	-1.60627	3.13e-17	0.99384	5.68098e-05
Lnc_000162	-5.15626	0.014198	Solyc03g114597.1	-1.39227	1.88e-15	0.992398	8.64747e-05
Lnc_000162	-5.15626	0.014198	Solyc03g114600.3	-1.39227	1.88e-15	0.992398	8.64747e-05
Lnc_000162	-5.15626	0.014198	Solyc03g118760.3	-1.78437	1.15e-13	0.998087	5.48353e-06
Lnc_000162	-5.15626	0.014198	Solyc03g119210.1	-1.7507	5.31e-22	0.992036	9.48779e-05
Lnc_000162	-5.15626	0.014198	Solyc03g119370.2	-1.24958	5.64e-07	0.99161	0.000105302
Lnc_000162	-5.15626	0.014198	Solyc03g122080.3	-2.18163	3.68e-21	0.993247	6.82465e-05
Lnc_000162	-5.15626	0.014198	Solyc03g122350.3	-1.06191	2.35e-13	0.993993	5.40161e-05
Lnc_000162	-5.15626	0.014198	Solyc03g122360.3	-1.06191	2.35e-13	0.993993	5.40161e-05
Lnc_000162	-5.15626	0.014198	Solyc03g123460.3	-2.15131	6.02e-17	0.996039	2.35017e-05
Lnc_000162	-5.15626	0.014198	Solyc03g124110.2	-3.91085	1.55e-52	0.992985	7.36351e-05
Lnc_000162	-5.15626	0.014198	Solyc04g005040.1	-1.09864	6e-12	0.99673	1.60225e-05
Lnc_000162	-5.15626	0.014198	Solyc04g005050.1	-1.09864	6e-12	0.99673	1.60225e-05
Lnc_000162	-5.15626	0.014198	Solyc04g014360.3	-2.17838	9.09e-17	0.997928	6.43386e-06
Lnc_000162	-5.15626	0.014198	Solyc04g025590.1	-1.3914	1.01e-05	0.997304	1.0896e-05
Lnc_000162	-5.15626	0.014198	Solyc04g054660.2	-1.69553	1.55e-18	0.995597	2.90342e-05
Lnc_000162	-5.15626	0.014198	Solyc04g054690.3	-1.69553	1.55e-18	0.995597	2.90342e-05
Lnc_000162	-5.15626	0.014198	Solyc04g057830.1	-1.39155	1.51e-07	0.993868	5.62822e-05
Lnc_000162	-5.15626	0.014198	Solyc04g071400.3	-1.1652	2.92e-09	0.991478	0.000108633
Lnc_000162	-5.15626	0.014198	Solyc04g072375.1	-1.67184	9.53e-11	0.995841	2.5906e-05
Lnc_000162	-5.15626	0.014198	Solyc04g072900.1	-1.17886	2.75e-12	0.998215	4.7752e-06
Lnc_000162	-5.15626	0.014198	Solyc04g074820.2	-1.27898	2.44e-10	0.996795	1.53919e-05
Lnc_000162	-5.15626	0.014198	Solyc04g074880.2	-3.16973	1.66e-39	0.993195	6.93061e-05
Lnc_000162	-5.15626	0.014198	Solyc04g077780.3	-1.00966	1.11e-07	0.995832	2.60214e-05
Lnc_000162	-5.15626	0.014198	Solyc04g077980.1	-1.05337	1.37e-10	0.998067	5.60066e-06
Lnc_000162	-5.15626	0.014198	Solyc04g079730.1	-2.67507	1.04e-29	0.994985	3.76595e-05
Lnc_000162	-5.15626	0.014198	Solyc04g080010.3	-1.33647	7.02e-11	0.999616	2.21659e-07
Lnc_000162	-5.15626	0.014198	Solyc04g082970.3	-1.03964	1.78e-11	0.996971	1.37516e-05
Lnc_000162	-5.15626	0.014198	Solyc05g009790.1	-1.11393	1.65e-11	0.997218	1.15961e-05
Lnc_000162	-5.15626	0.014198	Solyc05g010800.3	-2.37878	4.91e-17	0.999129	1.13892e-06
Lnc_000162	-5.15626	0.014198	Solyc05g012010.3	-1.03431	1.34e-13	0.990131	0.000145616
Lnc_000162	-5.15626	0.014198	Solyc05g012030.1	-1.10329	1.78e-10	0.993036	7.25823e-05
Lnc_000162	-5.15626	0.014198	Solyc05g013207.1	-2.05251	4.09e-15	0.996177	2.1893e-05
Lnc_000162	-5.15626	0.014198	Solyc05g013880.1	-1.67923	5.35e-17	0.994439	4.63007e-05
Lnc_000162	-5.15626	0.014198	Solyc05g018510.3	-1.19627	4.12e-14	0.993616	6.09938e-05
Lnc_000162	-5.15626	0.014198	Solyc05g050870.3	-2.18965	1.47e-06	0.992661	8.05875e-05
Lnc_000162	-5.15626	0.014198	Solyc05g051240.1	-1.1251	3.22e-10	0.996176	2.19074e-05
Lnc_000162	-5.15626	0.014198	Solyc05g051450.2	-1.41753	2.11e-12	0.997129	1.23512e-05
Lnc_000162	-5.15626	0.014198	Solyc05g051810.1	-1.88245	3.11e-08	0.998578	3.03063e-06
Lnc_000162	-5.15626	0.014198	Solyc05g052520.3	-1.11027	1.38e-08	0.998777	2.24114e-06
Lnc_000162	-5.15626	0.014198	Solyc05g053170.3	-3.20892	2.25e-15	0.998711	2.49297e-06
Lnc_000162	-5.15626	0.014198	Solyc05g054250.1	-1.61673	8.68e-15	0.99673	1.60214e-05
Lnc_000162	-5.15626	0.014198	Solyc06g005170.3	-1.78332	5.93e-17	0.997825	7.08938e-06
Lnc_000162	-5.15626	0.014198	Solyc06g008750.1	-1.12323	2.46e-09	0.994001	5.38755e-05
Lnc_000162	-5.15626	0.014198	Solyc06g009760.1	-1.27446	1.69e-05	0.996334	2.01391e-05
Lnc_000162	-5.15626	0.014198	Solyc06g035410.2	-1.07364	1.16e-07	0.991302	0.000113154
Lnc_000162	-5.15626	0.014198	Solyc06g035420.1	-1.07364	1.16e-07	0.991302	0.000113154
Lnc_000162	-5.15626	0.014198	Solyc06g054310.1	-1.61007	1.7e-09	0.999326	6.80305e-07
Lnc_000162	-5.15626	0.014198	Solyc06g054630.2	-2.25844	3.31e-13	0.993391	6.53693e-05
Lnc_000162	-5.15626	0.014198	Solyc06g061230.3	-2.19972	5.79e-22	0.993993	5.40261e-05
Lnc_000162	-5.15626	0.014198	Solyc06g065430.3	-1.24284	9.46e-10	0.997705	7.8926e-06
Lnc_000162	-5.15626	0.014198	Solyc06g068460.3	-1.28813	2.98e-08	0.994864	3.94958e-05
Lnc_000162	-5.15626	0.014198	Solyc06g071700.1	-1.65291	6.82e-15	0.998873	1.90415e-06
Lnc_000162	-5.15626	0.014198	Solyc06g072460.1	-1.4887	9.55e-11	0.996712	1.61967e-05
Lnc_000162	-5.15626	0.014198	Solyc06g073165.1	-2.72089	7.63e-28	0.997399	1.01397e-05
Lnc_000162	-5.15626	0.014198	Solyc06g073570.3	-3.17568	8.45e-15	0.997565	8.88939e-06
Lnc_000162	-5.15626	0.014198	Solyc06g074180.2	-1.09381	5.21e-09	0.99689	1.44917e-05
Lnc_000162	-5.15626	0.014198	Solyc06g074420.1	-1.50571	3.23e-09	0.995965	2.43932e-05
Lnc_000162	-5.15626	0.014198	Solyc06g075220.1	-1.53266	1.58e-09	0.994166	5.09547e-05
Lnc_000162	-5.15626	0.014198	Solyc06g075970.3	-1.47693	1.61e-07	0.990539	0.000133843
Lnc_000162	-5.15626	0.014198	Solyc06g076070.1	-1.61627	8.27e-05	0.993817	5.7229e-05
Lnc_000162	-5.15626	0.014198	Solyc06g076080.2	-1.48626	7.19e-11	0.998317	4.24768e-06
Lnc_000162	-5.15626	0.014198	Solyc07g006310.1	-1.61402	5.1e-13	0.991243	0.000114679
Lnc_000162	-5.15626	0.014198	Solyc07g006890.1	-1.60639	1.34e-18	0.992699	7.97717e-05
Lnc_000162	-5.15626	0.014198	Solyc07g008230.1	-1.39307	5.53e-10	0.995588	2.91493e-05
Lnc_000162	-5.15626	0.014198	Solyc07g008980.3	-2.35357	5.26e-13	0.99753	9.14219e-06
Lnc_000162	-5.15626	0.014198	Solyc07g016210.1	-3.33141	7.11e-37	0.996547	1.78639e-05
Lnc_000162	-5.15626	0.014198	Solyc07g042520.3	-2.93768	2.24e-41	0.992113	9.30596e-05
Lnc_000162	-5.15626	0.014198	Solyc07g043670.1	-1.91714	6.59e-14	0.998162	5.06499e-06
Lnc_000162	-5.15626	0.014198	Solyc07g053230.3	-1.21299	1.47e-10	0.993804	5.74634e-05
Lnc_000162	-5.15626	0.014198	Solyc07g055580.2	-1.88901	6.1e-12	0.999342	6.4918e-07
Lnc_000162	-5.15626	0.014198	Solyc07g055740.1	-2.26729	2e-23	0.997719	7.79704e-06
Lnc_000162	-5.15626	0.014198	Solyc07g056310.3	-1.00106	6.99e-08	0.99684	1.49644e-05
Lnc_000162	-5.15626	0.014198	Solyc07g056640.1	-1.4732	5.16e-12	0.998056	5.66283e-06
Lnc_000162	-5.15626	0.014198	Solyc07g063350.3	-1.36645	1.95e-14	0.996124	2.25093e-05
Lnc_000162	-5.15626	0.014198	Solyc07g063610.3	-1.93607	5.93e-05	0.994357	4.76725e-05
Lnc_000162	-5.15626	0.014198	Solyc08g007240.3	-1.56295	6.96e-16	0.995336	3.25759e-05
Lnc_000162	-5.15626	0.014198	Solyc08g007820.1	-3.35175	6.48e-32	0.997922	6.47255e-06
Lnc_000162	-5.15626	0.014198	Solyc08g007830.1	-1.69145	9.33e-14	0.990639	0.00013103
Lnc_000162	-5.15626	0.014198	Solyc08g008050.3	-1.01383	7e-08	0.997556	8.9555e-06
Lnc_000162	-5.15626	0.014198	Solyc08g008660.3	-2.04462	2.84e-22	0.991087	0.000118817
Lnc_000162	-5.15626	0.014198	Solyc08g014330.3	-2.07827	3.9e-15	0.998494	3.4015e-06
Lnc_000162	-5.15626	0.014198	Solyc08g014490.1	-3.15059	4.06e-23	0.9951	3.59562e-05
Lnc_000162	-5.15626	0.014198	Solyc08g016150.1	-2.42631	6.27e-33	0.990207	0.000143373
Lnc_000162	-5.15626	0.014198	Solyc08g036660.3	-4.30186	1.49e-55	0.994229	4.98559e-05
Lnc_000162	-5.15626	0.014198	Solyc08g043190.1	-1.41475	0.000111125	0.997198	1.17681e-05
Lnc_000162	-5.15626	0.014198	Solyc08g044510.3	-1.70213	8.87e-18	0.995475	3.06732e-05
Lnc_000162	-5.15626	0.014198	Solyc08g061560.3	-1.38314	2.33e-17	0.991598	0.000105602
Lnc_000162	-5.15626	0.014198	Solyc08g062180.2	-1.51334	1.65e-13	0.994737	4.14827e-05
Lnc_000162	-5.15626	0.014198	Solyc08g065380.3	-1.08782	1.22e-07	0.994909	3.88139e-05
Lnc_000162	-5.15626	0.014198	Solyc08g066900.1	-3.58436	2.73e-42	0.99586	2.56739e-05
Lnc_000162	-5.15626	0.014198	Solyc08g068130.1	-1.5635	3.61e-06	0.994806	4.04007e-05
Lnc_000162	-5.15626	0.014198	Solyc08g068140.3	-1.5635	3.61e-06	0.994806	4.04007e-05
Lnc_000162	-5.15626	0.014198	Solyc08g068590.3	-2.02035	4.89e-22	0.99676	1.57255e-05
Lnc_000162	-5.15626	0.014198	Solyc08g068600.3	-2.02035	4.89e-22	0.99676	1.57255e-05
Lnc_000162	-5.15626	0.014198	Solyc08g068610.3	-2.02035	4.89e-22	0.99676	1.57255e-05
Lnc_000162	-5.15626	0.014198	Solyc08g068630.3	-2.83226	8.04e-34	0.994098	5.21463e-05
Lnc_000162	-5.15626	0.014198	Solyc08g068680.3	-1.75666	1.93e-20	0.991181	0.00011631
Lnc_000162	-5.15626	0.014198	Solyc08g076970.3	-1.68073	2.45e-12	0.99873	2.4193e-06
Lnc_000162	-5.15626	0.014198	Solyc08g078083.1	-1.21579	1e-09	0.991248	0.000114549
Lnc_000162	-5.15626	0.014198	Solyc08g078087.1	-1.21579	1e-09	0.991248	0.000114549
Lnc_000162	-5.15626	0.014198	Solyc08g081220.1	-1.12854	7.55e-11	0.996146	2.22521e-05
Lnc_000162	-5.15626	0.014198	Solyc08g082090.1	-1.37547	2.66e-13	0.997072	1.2845e-05
Lnc_000162	-5.15626	0.014198	Solyc09g005630.3	-1.77548	8.13e-11	0.996923	1.41904e-05
Lnc_000162	-5.15626	0.014198	Solyc09g014590.3	-1.18063	9.56e-10	0.99902	1.44004e-06
Lnc_000162	-5.15626	0.014198	Solyc09g018170.3	-1.01416	3.67e-09	0.998656	2.70789e-06
Lnc_000162	-5.15626	0.014198	Solyc09g018590.1	-2.73075	6.86e-22	0.998609	2.90228e-06
Lnc_000162	-5.15626	0.014198	Solyc09g056450.3	-1.34646	9.73e-17	0.991485	0.000108438
Lnc_000162	-5.15626	0.014198	Solyc09g074550.3	-1.07762	1.97e-08	0.995331	3.26453e-05
Lnc_000162	-5.15626	0.014198	Solyc09g074600.1	-3.04879	1.24e-11	0.995042	3.68161e-05
Lnc_000162	-5.15626	0.014198	Solyc09g075410.3	-1.44044	1.35e-07	0.995886	2.53522e-05
Lnc_000162	-5.15626	0.014198	Solyc09g075900.3	-1.49169	1.03e-12	0.996494	1.84118e-05
Lnc_000162	-5.15626	0.014198	Solyc09g082830.3	-1.16002	1.38e-11	0.998539	3.19901e-06
Lnc_000162	-5.15626	0.014198	Solyc09g083290.3	-1.30812	5.96e-15	0.990149	0.000145083
Lnc_000162	-5.15626	0.014198	Solyc09g092710.3	-3.20214	9.81e-20	0.995836	2.59727e-05
Lnc_000162	-5.15626	0.014198	Solyc09g092715.1	-3.20214	9.81e-20	0.995836	2.59727e-05
Lnc_000162	-5.15626	0.014198	Solyc09g092720.3	-3.20214	9.81e-20	0.995836	2.59727e-05
Lnc_000162	-5.15626	0.014198	Solyc09g098540.3	-1.07313	4.97e-15	0.990529	0.000134122
Lnc_000162	-5.15626	0.014198	Solyc10g006130.1	-1.26657	2.03e-12	0.998241	4.63871e-06
Lnc_000162	-5.15626	0.014198	Solyc10g009480.3	-1.17167	2.13e-07	0.998206	4.82509e-06
Lnc_000162	-5.15626	0.014198	Solyc10g017540.3	-1.45621	1.34e-08	0.999541	3.15365e-07
Lnc_000162	-5.15626	0.014198	Solyc10g049580.2	-1.7536	5.14e-10	0.99717	1.20059e-05
Lnc_000162	-5.15626	0.014198	Solyc10g050970.1	-2.97797	1.09e-33	0.995103	3.59055e-05
Lnc_000162	-5.15626	0.014198	Solyc10g075110.2	-2.5378	7.93e-26	0.99617	2.19793e-05
Lnc_000162	-5.15626	0.014198	Solyc10g076410.1	-1.14589	1.44e-12	0.990455	0.000136239
Lnc_000162	-5.15626	0.014198	Solyc10g076820.2	-2.1962	4.51e-25	0.990301	0.000140643
Lnc_000162	-5.15626	0.014198	Solyc10g076940.2	-2.20128	2.04e-14	0.996998	1.35057e-05
Lnc_000162	-5.15626	0.014198	Solyc10g080510.1	-1.0206	2.88e-09	0.996148	2.22271e-05
Lnc_000162	-5.15626	0.014198	Solyc10g081550.2	-3.43798	6.8e-20	0.998737	2.39004e-06
Lnc_000162	-5.15626	0.014198	Solyc10g081720.2	-1.31288	5.02e-14	0.996623	1.70917e-05
Lnc_000162	-5.15626	0.014198	Solyc10g085670.2	-1.28813	6.01e-08	0.994985	3.76696e-05
Lnc_000162	-5.15626	0.014198	Solyc11g006650.2	-1.02676	2.91e-10	0.997395	1.01711e-05
Lnc_000162	-5.15626	0.014198	Solyc11g010500.1	-1.44418	2.6e-18	0.991567	0.000106385
Lnc_000162	-5.15626	0.014198	Solyc11g010960.2	-1.15786	1.35e-10	0.998067	5.60063e-06
Lnc_000162	-5.15626	0.014198	Solyc11g010980.2	-1.15786	1.35e-10	0.998067	5.60063e-06
Lnc_000162	-5.15626	0.014198	Solyc11g010990.2	-1.15786	1.35e-10	0.998067	5.60063e-06
Lnc_000162	-5.15626	0.014198	Solyc11g011600.2	-1.15443	1.17e-06	0.990689	0.000129627
Lnc_000162	-5.15626	0.014198	Solyc11g013330.2	-1.21089	2.98e-10	0.996051	2.33632e-05
Lnc_000162	-5.15626	0.014198	Solyc11g018530.2	-1.69971	8.55e-14	0.999631	2.0474e-07
Lnc_000162	-5.15626	0.014198	Solyc11g018535.1	-1.69971	8.55e-14	0.999631	2.0474e-07
Lnc_000162	-5.15626	0.014198	Solyc11g030730.2	-1.25324	1.12e-12	0.990922	0.000123245
Lnc_000162	-5.15626	0.014198	Solyc11g042560.1	-2.83637	1.39e-27	0.995396	3.1748e-05
Lnc_000162	-5.15626	0.014198	Solyc11g056680.1	-1.64069	8.51e-12	0.999205	9.48535e-07
Lnc_000162	-5.15626	0.014198	Solyc11g061980.1	-1.12269	1.22e-06	0.993121	7.08211e-05
Lnc_000162	-5.15626	0.014198	Solyc11g066120.2	-1.61334	2.12e-11	0.997568	8.86173e-06
Lnc_000162	-5.15626	0.014198	Solyc11g069570.2	-1.08147	3.63e-06	0.990105	0.000146391
Lnc_000162	-5.15626	0.014198	Solyc11g069900.2	-1.64599	1.82e-14	0.998631	2.80972e-06
Lnc_000162	-5.15626	0.014198	Solyc11g073080.2	-1.65573	4.3e-15	0.999663	1.70387e-07
Lnc_000162	-5.15626	0.014198	Solyc12g005310.2	-2.53564	2.39e-27	0.99149	0.000108333
Lnc_000162	-5.15626	0.014198	Solyc12g005340.2	-1.84705	3.85e-19	0.996169	2.19864e-05
Lnc_000162	-5.15626	0.014198	Solyc12g005450.1	-1.67148	5.47e-09	0.993556	6.21468e-05
Lnc_000162	-5.15626	0.014198	Solyc12g009220.2	-3.28308	6.19e-51	0.99026	0.000141831
Lnc_000162	-5.15626	0.014198	Solyc12g009270.1	-1.86824	5.1e-08	0.995835	2.5982e-05
Lnc_000162	-5.15626	0.014198	Solyc12g010540.1	-1.84666	5.67e-23	0.992336	8.78876e-05
Lnc_000162	-5.15626	0.014198	Solyc12g011300.2	-1.32832	4.42e-12	0.997373	1.03424e-05
Lnc_000162	-5.15626	0.014198	Solyc12g036440.1	-1.66286	1.18e-09	0.997481	9.51325e-06
Lnc_000162	-5.15626	0.014198	Solyc12g049040.1	-1.86588	3.49e-12	0.997097	1.26304e-05
Lnc_000162	-5.15626	0.014198	Solyc12g049050.1	-1.86588	3.49e-12	0.997097	1.26304e-05
Lnc_000162	-5.15626	0.014198	Solyc12g049070.1	-1.86588	3.49e-12	0.997097	1.26304e-05
Lnc_000162	-5.15626	0.014198	Solyc12g049090.2	-1.86588	3.49e-12	0.997097	1.26304e-05
Lnc_000162	-5.15626	0.014198	Solyc12g049150.1	-1.55683	1.28e-11	0.990733	0.000128421
Lnc_000162	-5.15626	0.014198	Solyc12g049160.1	-1.55683	1.28e-11	0.990733	0.000128421
Lnc_000162	-5.15626	0.014198	Solyc12g049180.1	-1.11327	1.34e-08	0.999581	2.62799e-07
Lnc_000162	-5.15626	0.014198	Solyc12g049360.2	-1.51507	2.59e-09	0.995909	2.50686e-05
Lnc_000162	-5.15626	0.014198	Solyc12g088390.1	-1.83068	5.36e-26	0.997775	7.42319e-06
Lnc_000162	-5.15626	0.014198	Solyc12g088400.1	-1.83068	5.36e-26	0.997775	7.42319e-06
Lnc_000162	-5.15626	0.014198	Solyc12g089190.1	-1.13067	0.000161157	0.991132	0.000117608
Lnc_000181	7.1118	0.00359929	Solyc01g099820.3	2.60333	7.9e-17	0.998543	3.18247e-06
Lnc_000181	7.1118	0.00359929	Solyc03g079980.2	1.00684	3.51e-09	0.99576	2.69253e-05
Lnc_000181	7.1118	0.00359929	Solyc04g077580.3	1.3873	2.36e-05	0.990258	0.000141883
Lnc_000181	7.1118	0.00359929	Solyc05g012370.3	1.1936	8.53e-25	0.990313	0.000140295
Lnc_000181	7.1118	0.00359929	Solyc05g052650.2	1.1996	2.98e-09	0.993554	6.2183e-05
Lnc_000181	7.1118	0.00359929	Solyc06g054090.1	1.38541	2.74e-23	0.993986	5.41422e-05
Lnc_000181	7.1118	0.00359929	Solyc06g060840.1	2.12642	2.09e-09	0.996421	1.91912e-05
Lnc_000181	7.1118	0.00359929	Solyc08g015800.1	1.14479	6.2e-05	0.991237	0.000114859
Lnc_000181	7.1118	0.00359929	Solyc08g065500.2	1.05806	1.07e-16	0.995864	2.56302e-05
Lnc_000181	7.1118	0.00359929	Solyc08g065670.3	1.05806	1.07e-16	0.995864	2.56302e-05
Lnc_000181	7.1118	0.00359929	Solyc08g067310.1	1.34827	5.57e-26	0.995458	3.09028e-05
Lnc_000181	7.1118	0.00359929	Solyc10g012130.1	1.50991	6.35e-06	0.996034	2.35649e-05
Lnc_000181	7.1118	0.00359929	Solyc10g079690.2	1.58812	2.9e-20	0.993678	5.98265e-05
Lnc_000181	7.1118	0.00359929	Solyc11g010520.1	1.3032	1.85e-05	0.993568	6.19151e-05
Lnc_000198	1.25333	0.00813441	Solyc01g068420.3	-1.01282	3.01e-07	-0.993537	6.25142e-05
Lnc_000198	1.25333	0.00813441	Solyc02g092980.3	-1.22939	5.04e-13	-0.992689	7.99903e-05
Lnc_000198	1.25333	0.00813441	Solyc05g005480.2	-1.31689	3.01e-11	-0.990036	0.000148418
Lnc_000198	1.25333	0.00813441	Solyc06g007890.3	-1.01234	5.25e-07	-0.990987	0.000121495
Lnc_000198	1.25333	0.00813441	Solyc06g007910.3	-1.01234	5.25e-07	-0.990987	0.000121495
Lnc_000198	1.25333	0.00813441	Solyc07g045530.2	-1.09973	1.11e-06	-0.995901	2.51689e-05
Lnc_000198	1.25333	0.00813441	Solyc07g062545.1	-1.32086	3.56e-12	-0.990908	0.00012361
Lnc_000198	1.25333	0.00813441	Solyc07g062550.3	-1.32086	3.56e-12	-0.990908	0.00012361
Lnc_000198	1.25333	0.00813441	Solyc09g074880.3	-1.09942	3.95e-11	-0.992792	7.77405e-05
Lnc_000198	1.25333	0.00813441	Solyc10g005340.3	-1.3351	4.61e-12	-0.991046	0.000119913
Lnc_000198	1.25333	0.00813441	Solyc11g066660.2	-1.04347	1.65e-10	-0.993029	7.27165e-05
Lnc_000198	1.25333	0.00813441	Solyc11g066665.1	-1.04347	1.65e-10	-0.993029	7.27165e-05
Lnc_000200	-3.99638	0.0460775	Solyc01g103470.2	-1.28757	2.78e-14	0.990171	0.000144428
Lnc_000200	-3.99638	0.0460775	Solyc10g005400.3	-1.07223	2.38e-11	0.993276	6.76605e-05
Lnc_000203	-3.98386	0.00360888	Solyc00g023700.2	-1.02503	2.44e-05	0.992458	8.51102e-05
Lnc_000203	-3.98386	0.00360888	Solyc00g023710.1	-1.00564	5.58e-06	0.992524	8.36357e-05
Lnc_000203	-3.98386	0.00360888	Solyc00g049220.1	-1.18811	1.09e-05	0.995879	2.5435e-05
Lnc_000203	-3.98386	0.00360888	Solyc00g069880.2	-1.08627	9.24e-06	0.994064	5.27429e-05
Lnc_000203	-3.98386	0.00360888	Solyc01g095450.3	-2.58519	3.24e-22	0.997288	1.1022e-05
Lnc_000203	-3.98386	0.00360888	Solyc01g098720.3	-1.85437	8.39e-09	0.998995	1.51378e-06
Lnc_000203	-3.98386	0.00360888	Solyc01g105030.3	-1.00253	6.47e-08	0.9921	9.33782e-05
Lnc_000203	-3.98386	0.00360888	Solyc01g105050.3	-1.00253	6.47e-08	0.9921	9.33782e-05
Lnc_000203	-3.98386	0.00360888	Solyc02g063380.1	-1.8234	1.18e-05	0.99906	1.32512e-06
Lnc_000203	-3.98386	0.00360888	Solyc02g065470.1	-2.25259	4.66e-06	0.99628	2.07357e-05
Lnc_000203	-3.98386	0.00360888	Solyc02g068070.3	-2.09311	8.88e-14	0.992078	9.38861e-05
Lnc_000203	-3.98386	0.00360888	Solyc02g069910.2	-1.46357	5.13e-06	0.996356	1.9895e-05
Lnc_000203	-3.98386	0.00360888	Solyc02g081270.3	-1.38327	2.08e-09	0.997564	8.89335e-06
Lnc_000203	-3.98386	0.00360888	Solyc02g091690.3	-2.71701	7.67e-15	0.9964	1.94139e-05
Lnc_000203	-3.98386	0.00360888	Solyc02g094330.3	-1.78293	1.62e-05	0.995558	2.9548e-05
Lnc_000203	-3.98386	0.00360888	Solyc03g007200.2	-1.48642	2.87e-11	0.99037	0.000138649
Lnc_000203	-3.98386	0.00360888	Solyc03g007690.1	-1.99353	5.87e-07	0.991466	0.000108937
Lnc_000203	-3.98386	0.00360888	Solyc03g019670.3	-1.16371	3.86e-05	0.993159	7.00426e-05
Lnc_000203	-3.98386	0.00360888	Solyc03g031860.3	-1.25896	3.05e-07	0.99239	8.66399e-05
Lnc_000203	-3.98386	0.00360888	Solyc03g117690.3	-1.71706	6.34e-07	0.993278	6.76211e-05
Lnc_000203	-3.98386	0.00360888	Solyc03g119080.4	-1.41859	5.61e-08	0.997463	9.64768e-06
Lnc_000203	-3.98386	0.00360888	Solyc03g119310.3	-1.12146	3.15e-07	0.994366	4.75216e-05
Lnc_000203	-3.98386	0.00360888	Solyc04g009020.3	-1.29046	3.5e-08	0.995853	2.57556e-05
Lnc_000203	-3.98386	0.00360888	Solyc04g009590.3	-1.19425	0.000330588	0.994926	3.85481e-05
Lnc_000203	-3.98386	0.00360888	Solyc04g011690.3	-1.41323	2.91e-06	0.992723	7.92334e-05
Lnc_000203	-3.98386	0.00360888	Solyc04g050930.3	-1.82484	4.22e-12	0.992056	9.44035e-05
Lnc_000203	-3.98386	0.00360888	Solyc04g074810.3	-1.55567	8.19e-07	0.993207	6.90535e-05
Lnc_000203	-3.98386	0.00360888	Solyc04g076190.1	-4.56104	1.68e-14	0.997434	9.86727e-06
Lnc_000203	-3.98386	0.00360888	Solyc04g081870.3	-1.00403	6.64e-06	0.997294	1.09776e-05
Lnc_000203	-3.98386	0.00360888	Solyc05g009040.3	-1.49622	9.14e-07	0.993701	5.93998e-05
Lnc_000203	-3.98386	0.00360888	Solyc05g009570.3	-2.05602	2.15e-08	0.999255	8.32548e-07
Lnc_000203	-3.98386	0.00360888	Solyc05g015658.1	-1.44739	2.69e-05	0.990478	0.000135579
Lnc_000203	-3.98386	0.00360888	Solyc05g015680.2	-1.44739	2.69e-05	0.990478	0.000135579
Lnc_000203	-3.98386	0.00360888	Solyc05g025600.1	-1.02978	3.26e-08	0.991229	0.000115061
Lnc_000203	-3.98386	0.00360888	Solyc05g050110.3	-1.13339	2.65e-07	0.994955	3.81126e-05
Lnc_000203	-3.98386	0.00360888	Solyc06g068550.3	-2.42329	4.06e-12	0.99522	3.42212e-05
Lnc_000203	-3.98386	0.00360888	Solyc07g005190.3	-1.60656	3.72e-09	0.991425	0.00010997
Lnc_000203	-3.98386	0.00360888	Solyc07g008420.3	-1.06847	0.000730127	0.992994	7.34607e-05
Lnc_000203	-3.98386	0.00360888	Solyc07g018383.1	-1.79963	1.55e-05	0.993766	5.81816e-05
Lnc_000203	-3.98386	0.00360888	Solyc07g061790.3	-1.20974	2.64e-06	0.998175	4.99342e-06
Lnc_000203	-3.98386	0.00360888	Solyc07g063720.1	-1.15638	1.47e-07	0.997917	6.50346e-06
Lnc_000203	-3.98386	0.00360888	Solyc07g063730.2	-1.15638	1.47e-07	0.997917	6.50346e-06
Lnc_000203	-3.98386	0.00360888	Solyc08g074480.1	-3.19365	1.29e-14	0.991826	9.994e-05
Lnc_000203	-3.98386	0.00360888	Solyc08g077110.3	-2.50794	3.37e-09	0.99462	4.33382e-05
Lnc_000203	-3.98386	0.00360888	Solyc08g078870.2	-2.46848	3.69e-10	0.992256	8.9727e-05
Lnc_000203	-3.98386	0.00360888	Solyc08g078900.1	-2.1788	0.00073895	0.990016	0.000149028
Lnc_000203	-3.98386	0.00360888	Solyc08g079180.3	-1.05892	1.62e-06	0.998922	1.74349e-06
Lnc_000203	-3.98386	0.00360888	Solyc08g079240.3	-1.12591	2.17e-06	0.992428	8.57901e-05
Lnc_000203	-3.98386	0.00360888	Solyc08g080050.3	-1.20953	3.86e-08	0.99305	7.22852e-05
Lnc_000203	-3.98386	0.00360888	Solyc08g083210.3	-1.83595	7.06e-13	0.994202	5.0332e-05
Lnc_000203	-3.98386	0.00360888	Solyc08g083215.1	-1.83595	7.06e-13	0.994202	5.0332e-05
Lnc_000203	-3.98386	0.00360888	Solyc09g014870.1	-1.23011	3.5e-05	0.998342	4.11925e-06
Lnc_000203	-3.98386	0.00360888	Solyc09g064500.3	-1.34827	3.16e-07	0.996002	2.39398e-05
Lnc_000203	-3.98386	0.00360888	Solyc09g082690.3	-1.57262	3.55e-05	0.997304	1.0896e-05
Lnc_000203	-3.98386	0.00360888	Solyc09g082695.1	-1.57262	3.55e-05	0.997304	1.0896e-05
Lnc_000203	-3.98386	0.00360888	Solyc09g082700.2	-1.57262	3.55e-05	0.997304	1.0896e-05
Lnc_000203	-3.98386	0.00360888	Solyc09g090570.2	-1.2075	4.89e-06	0.993248	6.82332e-05
Lnc_000203	-3.98386	0.00360888	Solyc09g098290.3	-1.51079	6.83e-08	0.995382	3.19347e-05
Lnc_000203	-3.98386	0.00360888	Solyc10g006800.3	-1.0543	5.88e-05	0.997084	1.27392e-05
Lnc_000203	-3.98386	0.00360888	Solyc10g007690.3	-1.08576	5.17e-08	0.993123	7.07821e-05
Lnc_000203	-3.98386	0.00360888	Solyc10g018300.2	-1.27006	6.12e-08	0.997425	9.93751e-06
Lnc_000203	-3.98386	0.00360888	Solyc10g048060.1	-1.08124	0.000178412	0.992905	7.53362e-05
Lnc_000203	-3.98386	0.00360888	Solyc10g055390.2	-1.11568	1.6e-06	0.99379	5.7735e-05
Lnc_000203	-3.98386	0.00360888	Solyc10g085240.1	-1.09157	9.08e-05	0.998188	4.92446e-06
Lnc_000203	-3.98386	0.00360888	Solyc10g085280.1	-1.09157	9.08e-05	0.998188	4.92446e-06
Lnc_000203	-3.98386	0.00360888	Solyc11g072080.1	-1.37947	4.82e-06	0.998025	5.84525e-06
Lnc_000203	-3.98386	0.00360888	Solyc12g005630.2	-1.3757	4.95e-09	0.992126	9.27591e-05
Lnc_000203	-3.98386	0.00360888	Solyc12g007160.2	-2.07733	0.000207147	0.992211	9.07736e-05
Lnc_000203	-3.98386	0.00360888	Solyc12g008980.2	-1.24327	1.23e-07	0.992987	7.35947e-05
Lnc_000203	-3.98386	0.00360888	Solyc12g009417.1	-1.31328	1.51e-06	0.993897	5.57583e-05
Lnc_000203	-3.98386	0.00360888	Solyc12g009650.2	-2.88658	1.68e-13	0.994428	4.64766e-05
Lnc_000203	-3.98386	0.00360888	Solyc12g014620.2	-3.11596	1.27e-13	0.994351	4.77739e-05
Lnc_000203	-3.98386	0.00360888	Solyc12g014630.1	-3.11596	1.27e-13	0.994351	4.77739e-05
Lnc_000203	-3.98386	0.00360888	Solyc12g055970.2	-3.10698	1.17e-11	0.994292	4.87724e-05
Lnc_000205	-7.02739	0.0370154	Solyc00g007570.2	-1.38854	0.00940095	0.991666	0.000103891
Lnc_000205	-7.02739	0.0370154	Solyc00g023580.1	-1.7389	0.000622086	0.994975	3.78068e-05
Lnc_000205	-7.02739	0.0370154	Solyc00g023590.2	-1.7389	0.000622086	0.994975	3.78068e-05
Lnc_000205	-7.02739	0.0370154	Solyc00g023600.2	-1.7389	0.000622086	0.994975	3.78068e-05
Lnc_000205	-7.02739	0.0370154	Solyc00g023700.2	-1.02503	2.44e-05	0.991006	0.000120964
Lnc_000205	-7.02739	0.0370154	Solyc00g025300.1	-3.04606	0.0461195	0.998848	1.98827e-06
Lnc_000205	-7.02739	0.0370154	Solyc00g047190.1	-2.12127	1.44e-05	0.994544	4.45769e-05
Lnc_000205	-7.02739	0.0370154	Solyc00g049220.1	-1.18811	1.09e-05	0.992519	8.37343e-05
Lnc_000205	-7.02739	0.0370154	Solyc00g052540.1	-1.61643	0.00133026	0.995227	3.41169e-05
Lnc_000205	-7.02739	0.0370154	Solyc00g068970.2	-1.38757	0.000376637	0.990985	0.000121534
Lnc_000205	-7.02739	0.0370154	Solyc00g094540.1	-1.13728	0.000131723	0.9919	9.81382e-05
Lnc_000205	-7.02739	0.0370154	Solyc00g108550.1	-1.23613	0.00560474	0.99376	5.82872e-05
Lnc_000205	-7.02739	0.0370154	Solyc00g164580.1	-1.46565	0.00903672	0.991642	0.000104491
Lnc_000205	-7.02739	0.0370154	Solyc00g181250.2	-1.2935	0.000572948	0.994654	4.2798e-05
Lnc_000205	-7.02739	0.0370154	Solyc00g281110.1	-2.15641	2.89e-05	0.995995	2.40249e-05
Lnc_000205	-7.02739	0.0370154	Solyc01g005990.3	-2.00575	0.000716178	0.99181	0.000100333
Lnc_000205	-7.02739	0.0370154	Solyc01g066910.3	-1.77955	0.0111404	0.99275	7.86567e-05
Lnc_000205	-7.02739	0.0370154	Solyc01g096940.3	-1.48592	0.00305786	0.994968	3.7912e-05
Lnc_000205	-7.02739	0.0370154	Solyc01g109390.3	-1.42744	0.00853628	0.994489	4.54759e-05
Lnc_000205	-7.02739	0.0370154	Solyc02g094330.3	-1.78293	1.62e-05	0.990511	0.000134622
Lnc_000205	-7.02739	0.0370154	Solyc03g007690.1	-1.99353	5.87e-07	0.99576	2.69339e-05
Lnc_000205	-7.02739	0.0370154	Solyc03g019670.3	-1.16371	3.86e-05	0.994286	4.88823e-05
Lnc_000205	-7.02739	0.0370154	Solyc03g061655.1	-2.11154	0.000104374	0.996296	2.05546e-05
Lnc_000205	-7.02739	0.0370154	Solyc03g119310.3	-1.12146	3.15e-07	0.992234	9.0231e-05
Lnc_000205	-7.02739	0.0370154	Solyc03g121900.1	-4.59619	7.53e-06	0.99437	4.74514e-05
Lnc_000205	-7.02739	0.0370154	Solyc04g009590.3	-1.19425	0.000330588	0.990987	0.000121472
Lnc_000205	-7.02739	0.0370154	Solyc04g074810.3	-1.55567	8.19e-07	0.990236	0.000142543
Lnc_000205	-7.02739	0.0370154	Solyc05g009040.3	-1.49622	9.14e-07	0.994561	4.42914e-05
Lnc_000205	-7.02739	0.0370154	Solyc05g012600.3	-1.0515	0.000944289	0.99664	1.69194e-05
Lnc_000205	-7.02739	0.0370154	Solyc05g015658.1	-1.44739	2.69e-05	0.991452	0.000109278
Lnc_000205	-7.02739	0.0370154	Solyc05g015680.2	-1.44739	2.69e-05	0.991452	0.000109278
Lnc_000205	-7.02739	0.0370154	Solyc05g021410.2	-3.04241	0.00246823	0.993571	6.18665e-05
Lnc_000205	-7.02739	0.0370154	Solyc06g005070.2	-1.78612	0.00119446	0.99469	4.22205e-05
Lnc_000205	-7.02739	0.0370154	Solyc06g024210.2	-1.12394	0.00227149	0.990915	0.000123439
Lnc_000205	-7.02739	0.0370154	Solyc06g035455.1	-1.99128	0.000437665	0.998098	5.42026e-06
Lnc_000205	-7.02739	0.0370154	Solyc06g035480.3	-1.99128	0.000437665	0.998098	5.42026e-06
Lnc_000205	-7.02739	0.0370154	Solyc06g066750.3	-1.26553	0.00750265	0.993441	6.43828e-05
Lnc_000205	-7.02739	0.0370154	Solyc06g066760.3	-1.26553	0.00750265	0.993441	6.43828e-05
Lnc_000205	-7.02739	0.0370154	Solyc06g068550.3	-2.42329	4.06e-12	0.99175	0.000101808
Lnc_000205	-7.02739	0.0370154	Solyc07g007860.1	-1.37229	0.000322839	0.996576	1.75649e-05
Lnc_000205	-7.02739	0.0370154	Solyc07g018383.1	-1.79963	1.55e-05	0.99007	0.000147414
Lnc_000205	-7.02739	0.0370154	Solyc07g019500.2	-1.02168	0.00757034	0.991525	0.000107436
Lnc_000205	-7.02739	0.0370154	Solyc07g065110.1	-1.72639	0.0187635	0.992259	8.96469e-05
Lnc_000205	-7.02739	0.0370154	Solyc08g066365.1	-1.49882	0.00722341	0.993937	5.50252e-05
Lnc_000205	-7.02739	0.0370154	Solyc08g066370.2	-1.49882	0.00722341	0.993937	5.50252e-05
Lnc_000205	-7.02739	0.0370154	Solyc08g068165.1	-1.16495	0.00359169	0.994134	5.15146e-05
Lnc_000205	-7.02739	0.0370154	Solyc08g068170.1	-1.16495	0.00359169	0.994134	5.15146e-05
Lnc_000205	-7.02739	0.0370154	Solyc08g078890.2	-2.60336	0.000280741	0.992119	9.29237e-05
Lnc_000205	-7.02739	0.0370154	Solyc08g078900.1	-2.1788	0.00073895	0.994939	3.8355e-05
Lnc_000205	-7.02739	0.0370154	Solyc08g078940.1	-2.60336	0.000280741	0.992119	9.29237e-05
Lnc_000205	-7.02739	0.0370154	Solyc09g011010.3	-1.00116	0.000739941	0.994365	4.75435e-05
Lnc_000205	-7.02739	0.0370154	Solyc09g011023.1	-1.00116	0.000739941	0.994365	4.75435e-05
Lnc_000205	-7.02739	0.0370154	Solyc09g015900.1	-1.58902	9.36e-05	0.998255	4.56381e-06
Lnc_000205	-7.02739	0.0370154	Solyc09g072700.3	-2.78741	0.000228748	0.994337	4.80191e-05
Lnc_000205	-7.02739	0.0370154	Solyc10g048060.1	-1.08124	0.000178412	0.997951	6.29414e-06
Lnc_000205	-7.02739	0.0370154	Solyc10g050440.2	-1.00195	0.000273063	0.99111	0.000118204
Lnc_000205	-7.02739	0.0370154	Solyc10g085240.1	-1.09157	9.08e-05	0.991291	0.00011343
Lnc_000205	-7.02739	0.0370154	Solyc10g085280.1	-1.09157	9.08e-05	0.991291	0.00011343
Lnc_000205	-7.02739	0.0370154	Solyc11g039370.2	-1.45538	0.00152891	0.992803	7.7505e-05
Lnc_000205	-7.02739	0.0370154	Solyc11g039380.1	-1.12467	0.00542913	0.99529	3.32177e-05
Lnc_000205	-7.02739	0.0370154	Solyc11g056530.1	-1.12838	0.0011821	0.999162	1.05225e-06
Lnc_000205	-7.02739	0.0370154	Solyc11g056637.1	-1.26858	0.00243683	0.993159	7.00402e-05
Lnc_000205	-7.02739	0.0370154	Solyc11g061700.2	-1.74605	3.17e-12	0.993123	7.07795e-05
Lnc_000205	-7.02739	0.0370154	Solyc11g063570.1	-1.33761	0.00330413	0.993609	6.11287e-05
Lnc_000205	-7.02739	0.0370154	Solyc11g063580.2	-1.19662	8.58e-05	0.992487	8.44589e-05
Lnc_000205	-7.02739	0.0370154	Solyc12g007160.2	-2.07733	0.000207147	0.993898	5.57397e-05
Lnc_000205	-7.02739	0.0370154	Solyc12g014620.2	-3.11596	1.27e-13	0.99431	4.84656e-05
Lnc_000205	-7.02739	0.0370154	Solyc12g014630.1	-3.11596	1.27e-13	0.99431	4.84656e-05
Lnc_000205	-7.02739	0.0370154	Solyc12g087940.2	-2.16116	0.00833103	0.992669	8.04147e-05
Lnc_000205	-7.02739	0.0370154	Solyc12g088640.2	-2.80595	5.29e-05	0.994882	3.92313e-05
Lnc_000208	-4.89266	0.00357947	Solyc00g013170.1	-2.99598	6.12e-06	0.991681	0.000103521
Lnc_000208	-4.89266	0.00357947	Solyc05g041810.1	-1.03251	0.00170877	0.993358	6.60352e-05
Lnc_000208	-4.89266	0.00357947	Solyc05g041900.1	-1.38531	0.0137901	0.991236	0.000114872
Lnc_000208	-4.89266	0.00357947	Solyc08g045880.1	-1.74279	0.000788482	0.996567	1.76558e-05
Lnc_000208	-4.89266	0.00357947	Solyc11g056260.1	-1.66481	0.0227025	0.991377	0.000111203
Lnc_000225	-5.50007	0.0233017	Solyc02g067550.1	-1.47735	3.16e-05	0.995802	2.63937e-05
Lnc_000225	-5.50007	0.0233017	Solyc02g085510.1	-1.70324	5.87e-08	0.994923	3.86053e-05
Lnc_000234	2.40883	5.05e-05	Solyc05g052650.2	1.1996	2.98e-09	0.991311	0.000112915
Lnc_000234	2.40883	5.05e-05	Solyc06g068930.2	1.03615	2.26e-07	0.990078	0.000147167
Lnc_000238	-1.36325	1.39e-08	Solyc00g050430.3	1.25427	0.00798026	-0.993646	6.04252e-05
Lnc_000238	-1.36325	1.39e-08	Solyc01g009160.2	-1.96153	1.75e-31	0.992547	8.3115e-05
Lnc_000238	-1.36325	1.39e-08	Solyc01g065530.3	-2.47282	9.31e-47	0.991617	0.000105114
Lnc_000238	-1.36325	1.39e-08	Solyc01g066560.3	-1.70409	1.36e-29	0.990139	0.000145382
Lnc_000238	-1.36325	1.39e-08	Solyc01g067440.3	-3.93401	1.69e-38	0.991889	9.8413e-05
Lnc_000238	-1.36325	1.39e-08	Solyc01g087140.3	-1.45072	1.35e-14	0.992481	8.4594e-05
Lnc_000238	-1.36325	1.39e-08	Solyc01g091165.1	-1.54169	1.12e-24	0.990042	0.000148261
Lnc_000238	-1.36325	1.39e-08	Solyc01g091180.3	-1.54169	1.12e-24	0.990042	0.000148261
Lnc_000238	-1.36325	1.39e-08	Solyc01g094910.3	-1.81201	3.08e-33	0.992123	9.28284e-05
Lnc_000238	-1.36325	1.39e-08	Solyc01g098400.3	-1.13742	8.24e-19	0.99003	0.000148603
Lnc_000238	-1.36325	1.39e-08	Solyc01g105300.3	-1.30606	3.94e-18	0.994008	5.37568e-05
Lnc_000238	-1.36325	1.39e-08	Solyc01g105650.3	-1.54972	3.78e-15	0.992979	7.3761e-05
Lnc_000238	-1.36325	1.39e-08	Solyc01g105870.3	-1.63339	1.56e-28	0.990452	0.000136303
Lnc_000238	-1.36325	1.39e-08	Solyc01g105880.4	-2.47144	2.49e-39	0.992084	9.37537e-05
Lnc_000238	-1.36325	1.39e-08	Solyc01g109250.2	-1.66983	1.03e-19	0.992979	7.37606e-05
Lnc_000238	-1.36325	1.39e-08	Solyc01g111310.3	-1.36049	2.8e-24	0.990045	0.000148161
Lnc_000238	-1.36325	1.39e-08	Solyc02g011980.1	-1.05834	1.11e-06	0.997494	9.41541e-06
Lnc_000238	-1.36325	1.39e-08	Solyc02g020890.3	-1.41697	8e-25	0.994176	5.07764e-05
Lnc_000238	-1.36325	1.39e-08	Solyc02g062690.3	-1.99452	9.26e-24	0.990671	0.000130133
Lnc_000238	-1.36325	1.39e-08	Solyc02g062890.2	-1.13747	7.59e-14	0.992373	8.70401e-05
Lnc_000238	-1.36325	1.39e-08	Solyc02g062900.2	-1.13747	7.59e-14	0.992373	8.70401e-05
Lnc_000238	-1.36325	1.39e-08	Solyc02g065430.1	-1.71962	5.06e-21	0.992456	8.51484e-05
Lnc_000238	-1.36325	1.39e-08	Solyc02g067600.1	-1.37889	2.33e-31	0.993886	5.59654e-05
Lnc_000238	-1.36325	1.39e-08	Solyc02g067610.1	-1.37889	2.33e-31	0.993886	5.59654e-05
Lnc_000238	-1.36325	1.39e-08	Solyc02g071790.2	-1.17627	1.82e-26	0.991022	0.000120544
Lnc_000238	-1.36325	1.39e-08	Solyc02g071800.3	-1.17627	1.82e-26	0.991022	0.000120544
Lnc_000238	-1.36325	1.39e-08	Solyc02g077710.1	-1.16522	1.15e-14	0.990216	0.000143113
Lnc_000238	-1.36325	1.39e-08	Solyc02g079360.2	-2.29623	1.48e-28	0.990073	0.000147334
Lnc_000238	-1.36325	1.39e-08	Solyc02g082040.3	-1.1861	1.72e-18	0.993957	5.46619e-05
Lnc_000238	-1.36325	1.39e-08	Solyc02g086460.3	-2.87236	6.35e-63	0.991592	0.000105757
Lnc_000238	-1.36325	1.39e-08	Solyc02g087350.2	-1.4856	6.97e-27	0.990365	0.000138815
Lnc_000238	-1.36325	1.39e-08	Solyc02g087440.3	-1.82314	1.85e-14	0.993196	6.92754e-05
Lnc_000238	-1.36325	1.39e-08	Solyc02g087830.3	-1.17063	7.92e-14	0.991419	0.000110141
Lnc_000238	-1.36325	1.39e-08	Solyc02g087840.3	-1.17063	7.92e-14	0.991419	0.000110141
Lnc_000238	-1.36325	1.39e-08	Solyc02g089990.1	-1.00652	1.2e-15	0.995516	3.01094e-05
Lnc_000238	-1.36325	1.39e-08	Solyc02g090500.3	-2.04453	4.55e-39	0.990659	0.000130472
Lnc_000238	-1.36325	1.39e-08	Solyc02g090505.1	-2.04453	4.55e-39	0.990659	0.000130472
Lnc_000238	-1.36325	1.39e-08	Solyc02g091810.2	-2.52273	3.66e-52	0.990693	0.000129536
Lnc_000238	-1.36325	1.39e-08	Solyc02g092215.1	-2.29618	7.22e-42	0.990255	0.00014199
Lnc_000238	-1.36325	1.39e-08	Solyc03g005330.1	-1.87602	5.36e-31	0.99032	0.000140092
Lnc_000238	-1.36325	1.39e-08	Solyc03g006250.2	-1.51668	4.62e-18	0.990356	0.000139064
Lnc_000238	-1.36325	1.39e-08	Solyc03g006670.3	-1.60214	3.13e-16	0.992507	8.40134e-05
Lnc_000238	-1.36325	1.39e-08	Solyc03g013340.3	-1.3292	1.53e-13	0.990459	0.000136121
Lnc_000238	-1.36325	1.39e-08	Solyc03g026170.3	-1.0104	1.97e-14	0.996973	1.37279e-05
Lnc_000238	-1.36325	1.39e-08	Solyc03g033330.3	1.18843	0.0435894	-0.991435	0.000109715
Lnc_000238	-1.36325	1.39e-08	Solyc03g034410.1	-2.225	5.5e-22	0.993486	6.35174e-05
Lnc_000238	-1.36325	1.39e-08	Solyc03g036470.2	-1.30444	9.38e-24	0.99361	6.11088e-05
Lnc_000238	-1.36325	1.39e-08	Solyc03g036473.1	-1.30444	9.38e-24	0.99361	6.11088e-05
Lnc_000238	-1.36325	1.39e-08	Solyc03g036480.2	-1.30444	9.38e-24	0.99361	6.11088e-05
Lnc_000238	-1.36325	1.39e-08	Solyc03g082790.3	-1.59823	1.34e-18	0.990492	0.000135167
Lnc_000238	-1.36325	1.39e-08	Solyc03g098300.1	-3.93176	1.33e-78	0.99102	0.000120595
Lnc_000238	-1.36325	1.39e-08	Solyc03g098660.3	-1.16954	2.11e-10	0.995824	2.61212e-05
Lnc_000238	-1.36325	1.39e-08	Solyc03g111880.3	-1.32545	1.37e-15	0.994023	5.34878e-05
Lnc_000238	-1.36325	1.39e-08	Solyc03g111920.2	-1.05891	1.22e-18	0.994309	4.84948e-05
Lnc_000238	-1.36325	1.39e-08	Solyc03g112700.1	-1.43288	1.04e-19	0.992162	9.19223e-05
Lnc_000238	-1.36325	1.39e-08	Solyc03g114620.1	-3.61234	1.84e-70	0.991352	0.000111861
Lnc_000238	-1.36325	1.39e-08	Solyc03g117270.1	-1.21378	8.27e-16	0.991612	0.000105244
Lnc_000238	-1.36325	1.39e-08	Solyc03g119250.3	-2.33698	2.24e-40	0.991221	0.000115263
Lnc_000238	-1.36325	1.39e-08	Solyc03g121620.1	-1.09288	1.36e-19	0.992295	8.88294e-05
Lnc_000238	-1.36325	1.39e-08	Solyc03g122340.3	-1.73779	3.5e-24	0.990467	0.000135883
Lnc_000238	-1.36325	1.39e-08	Solyc04g007750.3	-1.90988	1.02e-27	0.99176	0.000101561
Lnc_000238	-1.36325	1.39e-08	Solyc04g007760.3	-1.90988	1.02e-27	0.99176	0.000101561
Lnc_000238	-1.36325	1.39e-08	Solyc04g008930.2	-1.35404	1.91e-08	0.991088	0.000118789
Lnc_000238	-1.36325	1.39e-08	Solyc04g015820.1	-1.60201	2.94e-19	0.993356	6.60648e-05
Lnc_000238	-1.36325	1.39e-08	Solyc04g074830.1	-2.28152	3.93e-34	0.990525	0.000134241
Lnc_000238	-1.36325	1.39e-08	Solyc04g077570.1	-1.00347	1.16e-10	0.9902	0.000143595
Lnc_000238	-1.36325	1.39e-08	Solyc04g078860.3	-1.30166	5.84e-21	0.994618	4.33679e-05
Lnc_000238	-1.36325	1.39e-08	Solyc04g079360.1	-2.49873	5.04e-43	0.990598	0.000132175
Lnc_000238	-1.36325	1.39e-08	Solyc04g079560.3	-1.24455	1.19e-20	0.993942	5.49398e-05
Lnc_000238	-1.36325	1.39e-08	Solyc04g081560.3	-1.53166	1.25e-24	0.993731	5.88362e-05
Lnc_000238	-1.36325	1.39e-08	Solyc05g007580.1	-1.16577	8.8e-17	0.991635	0.000104677
Lnc_000238	-1.36325	1.39e-08	Solyc05g012010.3	-1.03431	1.34e-13	0.993081	7.1643e-05
Lnc_000238	-1.36325	1.39e-08	Solyc05g012380.3	-1.12089	3.74e-21	0.992789	7.78177e-05
Lnc_000238	-1.36325	1.39e-08	Solyc05g013560.3	-1.28459	5.48e-19	0.991054	0.000119689
Lnc_000238	-1.36325	1.39e-08	Solyc05g050540.3	-2.75102	6.03e-52	0.990459	0.000136099
Lnc_000238	-1.36325	1.39e-08	Solyc05g052040.1	-2.34373	6.74e-45	0.991083	0.000118914
Lnc_000238	-1.36325	1.39e-08	Solyc05g052550.1	-1.49306	4.15e-22	0.990459	0.000136115
Lnc_000238	-1.36325	1.39e-08	Solyc05g052570.3	-1.49306	4.15e-22	0.990459	0.000136115
Lnc_000238	-1.36325	1.39e-08	Solyc05g052890.3	-2.07511	1.23e-33	0.990179	0.000144215
Lnc_000238	-1.36325	1.39e-08	Solyc06g008750.1	-1.12323	2.46e-09	0.99214	9.24354e-05
Lnc_000238	-1.36325	1.39e-08	Solyc06g035700.1	-1.40795	1.14e-15	0.995679	2.79634e-05
Lnc_000238	-1.36325	1.39e-08	Solyc06g048410.3	-1.4721	1.88e-28	0.993236	6.84676e-05
Lnc_000238	-1.36325	1.39e-08	Solyc06g048420.2	-1.4721	1.88e-28	0.993236	6.84676e-05
Lnc_000238	-1.36325	1.39e-08	Solyc06g052060.3	-1.26903	1.59e-14	0.994961	3.80197e-05
Lnc_000238	-1.36325	1.39e-08	Solyc06g054320.1	-2.61565	2.02e-24	0.994753	4.12227e-05
Lnc_000238	-1.36325	1.39e-08	Solyc06g060870.1	-1.56085	1.7e-17	0.995244	3.38725e-05
Lnc_000238	-1.36325	1.39e-08	Solyc06g071480.3	-1.19004	2.07e-15	0.990598	0.000132186
Lnc_000238	-1.36325	1.39e-08	Solyc06g071560.3	-1.31145	2.8e-21	0.994492	4.54216e-05
Lnc_000238	-1.36325	1.39e-08	Solyc06g071570.3	-1.31145	2.8e-21	0.994492	4.54216e-05
Lnc_000238	-1.36325	1.39e-08	Solyc06g072390.3	-2.61361	5.16e-47	0.992894	7.55708e-05
Lnc_000238	-1.36325	1.39e-08	Solyc06g072400.2	-2.61361	5.16e-47	0.992894	7.55708e-05
Lnc_000238	-1.36325	1.39e-08	Solyc06g072403.1	-2.61361	5.16e-47	0.992894	7.55708e-05
Lnc_000238	-1.36325	1.39e-08	Solyc06g072407.1	-2.61361	5.16e-47	0.992894	7.55708e-05
Lnc_000238	-1.36325	1.39e-08	Solyc06g074030.1	-2.51657	3.47e-42	0.991355	0.000111788
Lnc_000238	-1.36325	1.39e-08	Solyc06g075690.3	-2.40728	9.57e-50	0.992333	8.79401e-05
Lnc_000238	-1.36325	1.39e-08	Solyc06g082780.3	-1.36186	2.27e-23	0.994439	4.62979e-05
Lnc_000238	-1.36325	1.39e-08	Solyc06g083160.1	-1.35347	3.59e-13	0.995721	2.74258e-05
Lnc_000238	-1.36325	1.39e-08	Solyc07g006570.3	-1.58562	5.97e-25	0.992071	9.40463e-05
Lnc_000238	-1.36325	1.39e-08	Solyc07g006630.3	-1.15343	4.15e-17	0.991336	0.000112261
Lnc_000238	-1.36325	1.39e-08	Solyc07g006890.1	-1.60639	1.34e-18	0.991422	0.000110067
Lnc_000238	-1.36325	1.39e-08	Solyc07g008560.3	-1.0411	5.47e-19	0.99544	3.11391e-05
Lnc_000238	-1.36325	1.39e-08	Solyc07g008570.3	-1.0411	5.47e-19	0.99544	3.11391e-05
Lnc_000238	-1.36325	1.39e-08	Solyc07g025500.2	-1.49417	1.03e-15	0.992445	8.54014e-05
Lnc_000238	-1.36325	1.39e-08	Solyc07g040960.1	-2.38748	1.35e-50	0.990795	0.000126719
Lnc_000238	-1.36325	1.39e-08	Solyc07g042520.3	-2.93768	2.24e-41	0.990393	0.000138001
Lnc_000238	-1.36325	1.39e-08	Solyc07g043700.2	-2.35312	8.24e-36	0.991238	0.000114829
Lnc_000238	-1.36325	1.39e-08	Solyc07g051820.3	-1.70395	3.06e-24	0.993526	6.27281e-05
Lnc_000238	-1.36325	1.39e-08	Solyc07g052380.3	-1.336	4.11e-15	0.990075	0.00014728
Lnc_000238	-1.36325	1.39e-08	Solyc07g053530.1	-1.6758	7.2e-28	0.990259	0.000141865
Lnc_000238	-1.36325	1.39e-08	Solyc07g055270.1	-1.18018	1.75e-19	0.990806	0.000126415
Lnc_000238	-1.36325	1.39e-08	Solyc07g056000.2	-2.46631	6.78e-35	0.991278	0.000113781
Lnc_000238	-1.36325	1.39e-08	Solyc07g062260.3	-1.24854	1.24e-15	0.996466	1.8716e-05
Lnc_000238	-1.36325	1.39e-08	Solyc07g065880.3	-2.14183	1.5e-47	0.991449	0.000109368
Lnc_000238	-1.36325	1.39e-08	Solyc08g005050.3	-1.61333	1.3e-28	0.990769	0.000127422
Lnc_000238	-1.36325	1.39e-08	Solyc08g014000.3	-1.85597	1.23e-32	0.991229	0.000115047
Lnc_000238	-1.36325	1.39e-08	Solyc08g016150.1	-2.42631	6.27e-33	0.991196	0.00011593
Lnc_000238	-1.36325	1.39e-08	Solyc08g036640.3	-4.47879	6.88e-91	0.991308	0.000112987
Lnc_000238	-1.36325	1.39e-08	Solyc08g066360.3	-1.77493	1.2e-29	0.993948	5.48216e-05
Lnc_000238	-1.36325	1.39e-08	Solyc08g067320.2	-1.30487	2.51e-13	0.995039	3.68493e-05
Lnc_000238	-1.36325	1.39e-08	Solyc08g067330.1	-1.30487	2.51e-13	0.995039	3.68493e-05
Lnc_000238	-1.36325	1.39e-08	Solyc08g068680.3	-1.75666	1.93e-20	0.99139	0.000110874
Lnc_000238	-1.36325	1.39e-08	Solyc08g074620.3	-1.46667	3.15e-14	0.992388	8.66991e-05
Lnc_000238	-1.36325	1.39e-08	Solyc08g074630.2	-1.46667	3.15e-14	0.992388	8.66991e-05
Lnc_000238	-1.36325	1.39e-08	Solyc08g074640.1	-1.46667	3.15e-14	0.992388	8.66991e-05
Lnc_000238	-1.36325	1.39e-08	Solyc08g078090.1	-2.20879	2.2e-37	0.991048	0.000119848
Lnc_000238	-1.36325	1.39e-08	Solyc08g080060.3	-2.12887	1.44e-17	0.992179	9.1505e-05
Lnc_000238	-1.36325	1.39e-08	Solyc08g080290.3	-1.53009	3.12e-20	0.995547	2.96949e-05
Lnc_000238	-1.36325	1.39e-08	Solyc08g080890.3	-1.03057	5.3e-19	0.990903	0.00012375
Lnc_000238	-1.36325	1.39e-08	Solyc09g007360.3	-1.54774	1.88e-28	0.99196	9.66981e-05
Lnc_000238	-1.36325	1.39e-08	Solyc09g056450.3	-1.34646	9.73e-17	0.99136	0.000111648
Lnc_000238	-1.36325	1.39e-08	Solyc09g082580.3	-1.20595	1.53e-18	0.993861	5.641e-05
Lnc_000238	-1.36325	1.39e-08	Solyc09g083290.3	-1.30812	5.96e-15	0.991547	0.000106882
Lnc_000238	-1.36325	1.39e-08	Solyc09g083360.3	-1.82022	1.58e-38	0.991326	0.000112521
Lnc_000238	-1.36325	1.39e-08	Solyc09g091550.3	-2.08065	2.45e-29	0.992493	8.43292e-05
Lnc_000238	-1.36325	1.39e-08	Solyc09g092470.2	-1.22946	1.21e-17	0.991654	0.000104202
Lnc_000238	-1.36325	1.39e-08	Solyc09g092520.3	-1.05544	3.42e-16	0.992034	9.49376e-05
Lnc_000238	-1.36325	1.39e-08	Solyc10g008400.1	-1.00741	6.52e-16	0.991183	0.000116277
Lnc_000238	-1.36325	1.39e-08	Solyc10g017510.3	-3.3226	4.26e-70	0.992153	9.213e-05
Lnc_000238	-1.36325	1.39e-08	Solyc10g049470.1	-1.09583	6.51e-14	0.993726	5.89249e-05
Lnc_000238	-1.36325	1.39e-08	Solyc10g050060.2	-1.14218	2.75e-18	0.991669	0.000103829
Lnc_000238	-1.36325	1.39e-08	Solyc10g076410.1	-1.14589	1.44e-12	0.993195	6.93105e-05
Lnc_000238	-1.36325	1.39e-08	Solyc10g076820.2	-2.1962	4.51e-25	0.990149	0.000145083
Lnc_000238	-1.36325	1.39e-08	Solyc10g078530.2	-1.19135	3.17e-21	0.992468	8.48801e-05
Lnc_000238	-1.36325	1.39e-08	Solyc10g080920.2	-2.15499	6.27e-37	0.993085	7.15538e-05
Lnc_000238	-1.36325	1.39e-08	Solyc10g083300.2	-1.01179	8.32e-19	0.990989	0.000121431
Lnc_000238	-1.36325	1.39e-08	Solyc10g083560.1	-1.48523	5.28e-10	0.992837	7.6785e-05
Lnc_000238	-1.36325	1.39e-08	Solyc10g084380.1	-1.15234	9.49e-12	0.997279	1.10966e-05
Lnc_000238	-1.36325	1.39e-08	Solyc11g007210.2	-1.00638	8.95e-11	0.996337	2.00977e-05
Lnc_000238	-1.36325	1.39e-08	Solyc11g007220.2	-1.00638	8.95e-11	0.996337	2.00977e-05
Lnc_000238	-1.36325	1.39e-08	Solyc11g013270.2	-1.1793	4.62e-16	0.996754	1.5789e-05
Lnc_000238	-1.36325	1.39e-08	Solyc11g030730.2	-1.25324	1.12e-12	0.993051	7.22666e-05
Lnc_000238	-1.36325	1.39e-08	Solyc11g042820.2	-1.09322	5.26e-15	0.996575	1.75724e-05
Lnc_000238	-1.36325	1.39e-08	Solyc11g045520.2	-2.07016	2.66e-40	0.991167	0.000116701
Lnc_000238	-1.36325	1.39e-08	Solyc11g071740.2	-1.80711	1.29e-34	0.991001	0.000121099
Lnc_000238	-1.36325	1.39e-08	Solyc11g071750.2	-1.80711	1.29e-34	0.991001	0.000121099
Lnc_000238	-1.36325	1.39e-08	Solyc11g071760.3	-1.80711	1.29e-34	0.991001	0.000121099
Lnc_000238	-1.36325	1.39e-08	Solyc12g009000.1	-2.90107	1.38e-50	0.993227	6.86635e-05
Lnc_000238	-1.36325	1.39e-08	Solyc12g009220.2	-3.28308	6.19e-51	0.990628	0.000131341
Lnc_000238	-1.36325	1.39e-08	Solyc12g010540.1	-1.84666	5.67e-23	0.990866	0.00012476
Lnc_000238	-1.36325	1.39e-08	Solyc12g042390.1	-1.80282	3.2e-21	0.995656	2.82658e-05
Lnc_000238	-1.36325	1.39e-08	Solyc12g044950.2	-1.35935	1.08e-21	0.991735	0.000102173
Lnc_000238	-1.36325	1.39e-08	Solyc12g049320.2	-2.38683	1.83e-49	0.991488	0.000108372
Lnc_000238	-1.36325	1.39e-08	Solyc12g098620.2	-1.04133	4.84e-15	0.996138	2.23384e-05
Lnc_000240	-5.55585	0.0234582	Solyc10g007510.2	-1.3785	3.46e-07	0.994466	4.58448e-05
Lnc_000263	1.40394	1.39e-16	Solyc01g006050.2	2.03222	6.53e-80	0.993186	6.94945e-05
Lnc_000263	1.40394	1.39e-16	Solyc01g007260.3	1.06131	6.15e-37	0.994548	4.45084e-05
Lnc_000263	1.40394	1.39e-16	Solyc01g008690.3	1.40399	3.63e-27	0.990953	0.000122396
Lnc_000263	1.40394	1.39e-16	Solyc01g010200.3	1.17051	1.83e-12	0.990296	0.000140784
Lnc_000263	1.40394	1.39e-16	Solyc01g060245.1	1.26482	4.19e-72	0.990307	0.000140488
Lnc_000263	1.40394	1.39e-16	Solyc01g060250.2	1.26482	4.19e-72	0.990307	0.000140488
Lnc_000263	1.40394	1.39e-16	Solyc01g060260.3	1.26482	4.19e-72	0.990307	0.000140488
Lnc_000263	1.40394	1.39e-16	Solyc01g060270.1	1.26482	4.19e-72	0.990307	0.000140488
Lnc_000263	1.40394	1.39e-16	Solyc01g067130.3	2.12743	2.53e-61	0.992288	8.89924e-05
Lnc_000263	1.40394	1.39e-16	Solyc01g068590.3	1.00236	3.74e-57	0.990123	0.000145853
Lnc_000263	1.40394	1.39e-16	Solyc01g068620.3	1.00236	3.74e-57	0.990123	0.000145853
Lnc_000263	1.40394	1.39e-16	Solyc01g068630.3	1.00236	3.74e-57	0.990123	0.000145853
Lnc_000263	1.40394	1.39e-16	Solyc01g079750.3	-2.42564	5.79e-69	-0.990829	0.00012578
Lnc_000263	1.40394	1.39e-16	Solyc01g081060.3	1.02561	6.46e-28	0.990633	0.000131212
Lnc_000263	1.40394	1.39e-16	Solyc01g087280.1	3.22885	2.95e-49	0.990624	0.000131439
Lnc_000263	1.40394	1.39e-16	Solyc01g091660.3	1.40819	2.89e-13	0.992391	8.66265e-05
Lnc_000263	1.40394	1.39e-16	Solyc01g091920.2	1.43663	3.37e-20	0.990494	0.000135128
Lnc_000263	1.40394	1.39e-16	Solyc01g095530.2	-2.01708	1.25e-97	-0.990749	0.000127973
Lnc_000263	1.40394	1.39e-16	Solyc01g095740.3	1.51834	3.98e-58	0.990246	0.000142245
Lnc_000263	1.40394	1.39e-16	Solyc01g095745.1	1.51834	3.98e-58	0.990246	0.000142245
Lnc_000263	1.40394	1.39e-16	Solyc01g096340.3	1.82075	3.72e-27	0.993771	5.80719e-05
Lnc_000263	1.40394	1.39e-16	Solyc01g097070.3	-1.61918	7.87e-18	-0.992363	8.72607e-05
Lnc_000263	1.40394	1.39e-16	Solyc01g098665.1	1.10919	3.45e-15	0.990808	0.000126354
Lnc_000263	1.40394	1.39e-16	Solyc01g098670.2	1.10919	3.45e-15	0.990808	0.000126354
Lnc_000263	1.40394	1.39e-16	Solyc01g099660.3	1.49837	3.8e-55	0.994085	5.23782e-05
Lnc_000263	1.40394	1.39e-16	Solyc01g100390.3	1.70685	8.02e-63	0.994252	4.94653e-05
Lnc_000263	1.40394	1.39e-16	Solyc01g101260.2	2.48602	6.07e-67	0.994653	4.28054e-05
Lnc_000263	1.40394	1.39e-16	Solyc01g103060.3	1.00591	2.85e-20	0.994477	4.56635e-05
Lnc_000263	1.40394	1.39e-16	Solyc01g103070.2	1.00591	2.85e-20	0.994477	4.56635e-05
Lnc_000263	1.40394	1.39e-16	Solyc01g105550.1	1.77215	6.22e-31	0.996805	1.52992e-05
Lnc_000263	1.40394	1.39e-16	Solyc01g107220.2	1.03049	6.33e-19	0.992699	7.97637e-05
Lnc_000263	1.40394	1.39e-16	Solyc01g107240.3	1.03049	6.33e-19	0.992699	7.97637e-05
Lnc_000263	1.40394	1.39e-16	Solyc01g109085.1	1.34964	2.06e-09	0.996742	1.5905e-05
Lnc_000263	1.40394	1.39e-16	Solyc01g109810.2	2.37151	6.42e-23	0.991682	0.000103493
Lnc_000263	1.40394	1.39e-16	Solyc01g110130.3	-2.06707	2.41e-132	-0.990476	0.000135628
Lnc_000263	1.40394	1.39e-16	Solyc01g110470.3	1.0317	8.19e-35	0.996969	1.37652e-05
Lnc_000263	1.40394	1.39e-16	Solyc01g111590.3	-1.19315	5.59e-42	-0.990275	0.000141391
Lnc_000263	1.40394	1.39e-16	Solyc02g005430.2	1.11302	2.36e-17	0.998976	1.5733e-06
Lnc_000263	1.40394	1.39e-16	Solyc02g032100.3	1.10732	1.42e-14	0.998106	5.37518e-06
Lnc_000263	1.40394	1.39e-16	Solyc02g062040.3	1.72104	8.48e-72	0.991428	0.000109896
Lnc_000263	1.40394	1.39e-16	Solyc02g064560.1	1.15628	2.13e-10	0.997127	1.23684e-05
Lnc_000263	1.40394	1.39e-16	Solyc02g064720.3	2.52504	3.9e-39	0.996928	1.41431e-05
Lnc_000263	1.40394	1.39e-16	Solyc02g069070.3	-1.33664	2.69e-13	-0.993049	7.23105e-05
Lnc_000263	1.40394	1.39e-16	Solyc02g069680.3	-2.3524	3.06e-92	-0.99022	0.000143003
Lnc_000263	1.40394	1.39e-16	Solyc02g076910.3	2.46693	8.8e-51	0.990016	0.000149014
Lnc_000263	1.40394	1.39e-16	Solyc02g077090.3	-1.7385	5.95e-88	-0.991155	0.000117
Lnc_000263	1.40394	1.39e-16	Solyc02g079750.3	1.18878	1.75e-39	0.990338	0.00013957
Lnc_000263	1.40394	1.39e-16	Solyc02g080900.3	-1.20621	4.92e-31	-0.995568	2.94241e-05
Lnc_000263	1.40394	1.39e-16	Solyc02g081210.3	-1.52018	3.71e-41	-0.990493	0.000135157
Lnc_000263	1.40394	1.39e-16	Solyc02g083280.3	1.28061	7.14e-150	0.990312	0.000140339
Lnc_000263	1.40394	1.39e-16	Solyc02g083620.3	1.00618	3.33e-18	0.990408	0.000137556
Lnc_000263	1.40394	1.39e-16	Solyc02g083730.3	2.65623	2.56e-61	0.990578	0.000132738
Lnc_000263	1.40394	1.39e-16	Solyc02g085630.3	1.21117	1.56e-19	0.99184	9.96085e-05
Lnc_000263	1.40394	1.39e-16	Solyc02g087890.3	2.96864	8.46e-167	0.993181	6.95821e-05
Lnc_000263	1.40394	1.39e-16	Solyc02g088180.3	1.6228	4.24e-80	0.993041	7.24763e-05
Lnc_000263	1.40394	1.39e-16	Solyc02g089160.3	1.48964	2.37e-64	0.995184	3.47377e-05
Lnc_000263	1.40394	1.39e-16	Solyc02g091360.1	1.4911	6.77e-23	0.991823	0.00010002
Lnc_000263	1.40394	1.39e-16	Solyc02g093890.1	2.26313	1.12e-84	0.994595	4.37359e-05
Lnc_000263	1.40394	1.39e-16	Solyc03g005320.3	1.80462	3.4e-254	0.990904	0.000123733
Lnc_000263	1.40394	1.39e-16	Solyc03g005840.2	1.74883	8.87e-30	0.993969	5.44455e-05
Lnc_000263	1.40394	1.39e-16	Solyc03g025810.3	2.75488	2.98e-13	0.993405	6.51019e-05
Lnc_000263	1.40394	1.39e-16	Solyc03g026050.3	2.45517	6.67e-14	0.995647	2.83809e-05
Lnc_000263	1.40394	1.39e-16	Solyc03g031580.2	5.34685	1.09e-230	0.99046	0.000136074
Lnc_000263	1.40394	1.39e-16	Solyc03g032080.3	1.27377	3.75e-29	0.996712	1.61978e-05
Lnc_000263	1.40394	1.39e-16	Solyc03g062820.1	1.7229	3.24e-40	0.993027	7.27709e-05
Lnc_000263	1.40394	1.39e-16	Solyc03g082640.2	1.43701	4.62e-51	0.993589	6.15132e-05
Lnc_000263	1.40394	1.39e-16	Solyc03g082860.3	-1.74335	2.43e-28	-0.995382	3.19395e-05
Lnc_000263	1.40394	1.39e-16	Solyc03g095510.3	1.1051	3.58e-44	0.995784	2.66265e-05
Lnc_000263	1.40394	1.39e-16	Solyc03g095700.1	1.62246	2.11e-08	0.99451	4.51242e-05
Lnc_000263	1.40394	1.39e-16	Solyc03g097120.3	1.01293	4.01e-53	0.99139	0.000110882
Lnc_000263	1.40394	1.39e-16	Solyc03g098100.3	1.14268	6.12e-18	0.991882	9.85782e-05
Lnc_000263	1.40394	1.39e-16	Solyc03g111100.1	1.84351	1.17e-24	0.990102	0.000146485
Lnc_000263	1.40394	1.39e-16	Solyc03g113690.1	2.23557	2.18e-90	0.99547	3.07332e-05
Lnc_000263	1.40394	1.39e-16	Solyc03g114690.3	-1.94969	2.15e-63	-0.992863	7.62153e-05
Lnc_000263	1.40394	1.39e-16	Solyc03g114970.3	-1.66933	1.08e-71	-0.990765	0.000127527
Lnc_000263	1.40394	1.39e-16	Solyc03g115230.3	1.48429	1.22e-81	0.991103	0.000118377
Lnc_000263	1.40394	1.39e-16	Solyc03g116070.1	1.01918	2.71e-32	0.994885	3.91715e-05
Lnc_000263	1.40394	1.39e-16	Solyc03g116710.3	-1.29713	9.84e-27	-0.992032	9.49823e-05
Lnc_000263	1.40394	1.39e-16	Solyc03g117630.1	1.10501	6.67e-15	0.994145	5.13297e-05
Lnc_000263	1.40394	1.39e-16	Solyc04g005380.3	1.50761	7.13e-64	0.993399	6.52127e-05
Lnc_000263	1.40394	1.39e-16	Solyc04g007570.2	2.01878	2.41e-64	0.994514	4.50677e-05
Lnc_000263	1.40394	1.39e-16	Solyc04g007630.2	2.85193	5.39e-104	0.99426	4.93289e-05
Lnc_000263	1.40394	1.39e-16	Solyc04g008090.3	-1.72412	5.39e-43	-0.990187	0.000143966
Lnc_000263	1.40394	1.39e-16	Solyc04g011810.1	-2.76464	1.47e-26	-0.991452	0.00010929
Lnc_000263	1.40394	1.39e-16	Solyc04g015520.3	1.4367	4.38e-43	0.995596	2.90505e-05
Lnc_000263	1.40394	1.39e-16	Solyc04g015530.2	1.4439	3.61e-16	0.995434	3.12229e-05
Lnc_000263	1.40394	1.39e-16	Solyc04g016330.3	1.37559	9.24e-61	0.991261	0.000114225
Lnc_000263	1.40394	1.39e-16	Solyc04g053130.3	1.2653	2.51e-75	0.995032	3.69579e-05
Lnc_000263	1.40394	1.39e-16	Solyc04g054150.1	1.68305	4.83e-34	0.998976	1.57365e-06
Lnc_000263	1.40394	1.39e-16	Solyc04g054257.1	1.43756	6.82e-44	0.998483	3.44917e-06
Lnc_000263	1.40394	1.39e-16	Solyc04g054340.1	1.21552	4.48e-96	0.99057	0.000132964
Lnc_000263	1.40394	1.39e-16	Solyc04g056310.3	2.19578	7.28e-34	0.999065	1.31057e-06
Lnc_000263	1.40394	1.39e-16	Solyc04g071770.3	2.23384	1.37e-246	0.991587	0.00010586
Lnc_000263	1.40394	1.39e-16	Solyc04g072160.3	1.39908	1.53e-74	0.991471	0.000108805
Lnc_000263	1.40394	1.39e-16	Solyc04g076440.1	2.23997	8.55e-15	0.997006	1.34288e-05
Lnc_000263	1.40394	1.39e-16	Solyc04g078195.1	1.55357	5.15e-38	0.994569	4.41682e-05
Lnc_000263	1.40394	1.39e-16	Solyc04g078200.3	1.55357	5.15e-38	0.994569	4.41682e-05
Lnc_000263	1.40394	1.39e-16	Solyc04g078840.3	1.38955	1.18e-49	0.991	0.000121143
Lnc_000263	1.40394	1.39e-16	Solyc04g079830.2	1.02934	2.74e-13	0.990596	0.000132244
Lnc_000263	1.40394	1.39e-16	Solyc04g081290.3	1.74388	1.03e-25	0.990797	0.000126646
Lnc_000263	1.40394	1.39e-16	Solyc04g081460.2	1.63426	4.11e-32	0.992327	8.8097e-05
Lnc_000263	1.40394	1.39e-16	Solyc05g005337.1	1.12154	6.23e-42	0.992981	7.37162e-05
Lnc_000263	1.40394	1.39e-16	Solyc05g006850.3	1.47349	3.24e-104	0.994408	4.68186e-05
Lnc_000263	1.40394	1.39e-16	Solyc05g006860.3	1.47349	3.24e-104	0.994408	4.68186e-05
Lnc_000263	1.40394	1.39e-16	Solyc05g007220.3	1.58309	1.25e-164	0.991898	9.81908e-05
Lnc_000263	1.40394	1.39e-16	Solyc05g008390.3	1.05842	4.04e-21	0.992396	8.65082e-05
Lnc_000263	1.40394	1.39e-16	Solyc05g013530.3	1.28902	2.5e-58	0.990583	0.000132599
Lnc_000263	1.40394	1.39e-16	Solyc05g013660.3	1.06686	7.56e-20	0.994418	4.66432e-05
Lnc_000263	1.40394	1.39e-16	Solyc05g014560.3	1.82306	3.97e-27	0.997779	7.39422e-06
Lnc_000263	1.40394	1.39e-16	Solyc05g046340.2	2.00617	2.12e-27	0.991008	0.000120923
Lnc_000263	1.40394	1.39e-16	Solyc05g051350.2	1.88417	1.73e-47	0.994406	4.6855e-05
Lnc_000263	1.40394	1.39e-16	Solyc05g051550.2	1.96437	4.52e-50	0.990793	0.000126755
Lnc_000263	1.40394	1.39e-16	Solyc05g052270.2	1.43115	7e-75	0.992784	7.79185e-05
Lnc_000263	1.40394	1.39e-16	Solyc05g055330.3	1.33668	3.08e-25	0.993082	7.16171e-05
Lnc_000263	1.40394	1.39e-16	Solyc05g055910.3	1.32863	2.78e-53	0.999096	1.22591e-06
Lnc_000263	1.40394	1.39e-16	Solyc05g055920.3	1.32863	2.78e-53	0.999096	1.22591e-06
Lnc_000263	1.40394	1.39e-16	Solyc05g055930.2	1.32863	2.78e-53	0.999096	1.22591e-06
Lnc_000263	1.40394	1.39e-16	Solyc06g008500.3	-1.31403	1.45e-20	-0.992372	8.70655e-05
Lnc_000263	1.40394	1.39e-16	Solyc06g009810.3	1.72339	1.74e-20	0.992084	9.37401e-05
Lnc_000263	1.40394	1.39e-16	Solyc06g048860.2	2.13807	9.69e-39	0.991415	0.00011025
Lnc_000263	1.40394	1.39e-16	Solyc06g051940.3	2.77253	1.34e-100	0.9935	6.32472e-05
Lnc_000263	1.40394	1.39e-16	Solyc06g053600.3	-1.2052	1.53e-06	-0.993362	6.59578e-05
Lnc_000263	1.40394	1.39e-16	Solyc06g054060.1	2.80895	1.29e-126	0.995689	2.78342e-05
Lnc_000263	1.40394	1.39e-16	Solyc06g054070.3	2.80895	1.29e-126	0.995689	2.78342e-05
Lnc_000263	1.40394	1.39e-16	Solyc06g059860.3	1.46766	2e-117	0.992911	7.52066e-05
Lnc_000263	1.40394	1.39e-16	Solyc06g060410.3	1.33306	1.59e-21	0.995068	3.64216e-05
Lnc_000263	1.40394	1.39e-16	Solyc06g061200.1	-1.00459	6.85e-65	-0.990636	0.00013113
Lnc_000263	1.40394	1.39e-16	Solyc06g062420.3	1.11705	7.27e-38	0.994878	3.92896e-05
Lnc_000263	1.40394	1.39e-16	Solyc06g065655.1	1.91972	2.83e-132	0.990008	0.000149254
Lnc_000263	1.40394	1.39e-16	Solyc06g065670.3	1.91972	2.83e-132	0.990008	0.000149254
Lnc_000263	1.40394	1.39e-16	Solyc06g066420.3	1.07351	2.29e-19	0.995151	3.52123e-05
Lnc_000263	1.40394	1.39e-16	Solyc06g068890.1	1.52801	1.39e-09	0.99062	0.000131555
Lnc_000263	1.40394	1.39e-16	Solyc06g069045.1	1.07625	3.54e-39	0.993065	7.19796e-05
Lnc_000263	1.40394	1.39e-16	Solyc06g071930.1	2.20486	6.78e-14	0.990231	0.000142692
Lnc_000263	1.40394	1.39e-16	Solyc06g072845.1	1.573	5.57e-12	0.991972	9.64126e-05
Lnc_000263	1.40394	1.39e-16	Solyc06g072850.1	1.573	5.57e-12	0.991972	9.64126e-05
Lnc_000263	1.40394	1.39e-16	Solyc06g072860.2	2.07255	9.6e-118	0.990988	0.000121454
Lnc_000263	1.40394	1.39e-16	Solyc06g072870.1	2.07255	9.6e-118	0.990988	0.000121454
Lnc_000263	1.40394	1.39e-16	Solyc06g072880.2	2.07255	9.6e-118	0.990988	0.000121454
Lnc_000263	1.40394	1.39e-16	Solyc06g073990.2	2.52373	1.25e-59	0.990239	0.000142442
Lnc_000263	1.40394	1.39e-16	Solyc06g074390.3	2.29459	1.08e-287	0.990338	0.00013959
Lnc_000263	1.40394	1.39e-16	Solyc06g076760.2	1.60391	2.79e-156	0.993185	6.95148e-05
Lnc_000263	1.40394	1.39e-16	Solyc07g005510.3	-1.11801	3.52e-24	-0.990823	0.00012593
Lnc_000263	1.40394	1.39e-16	Solyc07g006380.3	1.52129	1.38e-06	0.99791	6.54989e-06
Lnc_000263	1.40394	1.39e-16	Solyc07g007800.3	1.69748	1.81e-33	0.993549	6.22888e-05
Lnc_000263	1.40394	1.39e-16	Solyc07g008710.3	2.37004	7.86e-19	0.991477	0.000108656
Lnc_000263	1.40394	1.39e-16	Solyc07g016160.3	-1.0327	1.52e-52	-0.990277	0.000141342
Lnc_000263	1.40394	1.39e-16	Solyc07g016170.3	-1.0327	1.52e-52	-0.990277	0.000141342
Lnc_000263	1.40394	1.39e-16	Solyc07g049370.2	-1.27218	1.72e-55	-0.991077	0.000119062
Lnc_000263	1.40394	1.39e-16	Solyc07g052240.3	-1.7629	1.47e-46	-0.992514	8.38523e-05
Lnc_000263	1.40394	1.39e-16	Solyc07g056250.3	-1.10347	3.41e-31	-0.992399	8.64489e-05
Lnc_000263	1.40394	1.39e-16	Solyc07g066550.3	1.04834	4.09e-70	0.993137	7.04872e-05
Lnc_000263	1.40394	1.39e-16	Solyc08g007790.3	1.79247	3.4e-44	0.991577	0.000106113
Lnc_000263	1.40394	1.39e-16	Solyc08g060920.3	1.2527	6.17e-57	0.990984	0.000121553
Lnc_000263	1.40394	1.39e-16	Solyc08g062340.3	1.06432	2.49e-21	0.991891	9.83671e-05
Lnc_000263	1.40394	1.39e-16	Solyc08g062450.1	1.06432	2.49e-21	0.991891	9.83671e-05
Lnc_000263	1.40394	1.39e-16	Solyc08g062820.3	1.19044	4.24e-44	0.991619	0.000105071
Lnc_000263	1.40394	1.39e-16	Solyc08g065330.3	1.7601	8.51e-51	0.997098	1.26238e-05
Lnc_000263	1.40394	1.39e-16	Solyc08g068960.3	1.33158	1.56e-93	0.990846	0.000125322
Lnc_000263	1.40394	1.39e-16	Solyc08g078010.3	-1.23306	8.24e-21	-0.995143	3.53355e-05
Lnc_000263	1.40394	1.39e-16	Solyc08g078030.3	2.11967	4.15e-58	0.995295	3.31599e-05
Lnc_000263	1.40394	1.39e-16	Solyc08g080720.2	-1.30814	6.91e-11	-0.994855	3.96372e-05
Lnc_000263	1.40394	1.39e-16	Solyc08g080760.2	1.05822	1.43e-17	0.997772	7.44116e-06
Lnc_000263	1.40394	1.39e-16	Solyc08g080770.3	1.05822	1.43e-17	0.997772	7.44116e-06
Lnc_000263	1.40394	1.39e-16	Solyc08g082860.3	1.932	2.64e-165	0.990218	0.000143065
Lnc_000263	1.40394	1.39e-16	Solyc09g005200.3	1.31281	1.39e-26	0.993154	7.01485e-05
Lnc_000263	1.40394	1.39e-16	Solyc09g007860.3	2.10191	1.68e-159	0.991318	0.000112732
Lnc_000263	1.40394	1.39e-16	Solyc09g008990.3	-3.05941	1.3e-75	-0.990642	0.000130962
Lnc_000263	1.40394	1.39e-16	Solyc09g009010.3	-3.05941	1.3e-75	-0.990642	0.000130962
Lnc_000263	1.40394	1.39e-16	Solyc09g009860.1	-2.5986	9.07e-46	-0.990874	0.000124547
Lnc_000263	1.40394	1.39e-16	Solyc09g014310.3	1.98339	1.46e-43	0.995116	3.57224e-05
Lnc_000263	1.40394	1.39e-16	Solyc09g059440.1	-1.45901	8.83e-32	-0.991461	0.000109067
Lnc_000263	1.40394	1.39e-16	Solyc09g065390.1	1.00738	4.85e-11	0.994253	4.94401e-05
Lnc_000263	1.40394	1.39e-16	Solyc09g066150.1	1.51062	4.48e-87	0.994327	4.81781e-05
Lnc_000263	1.40394	1.39e-16	Solyc09g075270.1	1.52505	1.16e-10	0.992473	8.47659e-05
Lnc_000263	1.40394	1.39e-16	Solyc09g075630.1	1.13632	1.62e-29	0.991421	0.000110092
Lnc_000263	1.40394	1.39e-16	Solyc09g082290.3	1.85749	5e-17	0.996714	1.61761e-05
Lnc_000263	1.40394	1.39e-16	Solyc09g082300.3	1.65097	3.28e-23	0.990358	0.000139018
Lnc_000263	1.40394	1.39e-16	Solyc09g082930.1	3.20539	3.34e-11	0.997729	7.73084e-06
Lnc_000263	1.40394	1.39e-16	Solyc09g083230.1	1.13633	1.55e-40	0.993061	7.20571e-05
Lnc_000263	1.40394	1.39e-16	Solyc09g083240.3	1.13633	1.55e-40	0.993061	7.20571e-05
Lnc_000263	1.40394	1.39e-16	Solyc09g089930.2	1.30146	6.44e-28	0.991186	0.000116195
Lnc_000263	1.40394	1.39e-16	Solyc09g090360.3	1.11061	1.43e-118	0.991968	9.65036e-05
Lnc_000263	1.40394	1.39e-16	Solyc09g092510.3	-1.49991	3.39e-45	-0.99396	5.46082e-05
Lnc_000263	1.40394	1.39e-16	Solyc09g092690.3	1.41108	9.26e-25	0.993123	7.07733e-05
Lnc_000263	1.40394	1.39e-16	Solyc09g098080.3	1.28229	8.63e-28	0.996426	1.91353e-05
Lnc_000263	1.40394	1.39e-16	Solyc10g009240.3	1.29311	1.25e-127	0.990781	0.000127098
Lnc_000263	1.40394	1.39e-16	Solyc10g017690.1	1.04887	3.17e-09	0.997253	1.13087e-05
Lnc_000263	1.40394	1.39e-16	Solyc10g050550.2	1.37594	1e-12	0.996372	1.97144e-05
Lnc_000263	1.40394	1.39e-16	Solyc10g051120.2	1.17927	1.21e-12	0.993252	6.81452e-05
Lnc_000263	1.40394	1.39e-16	Solyc10g054540.1	2.02978	7.33e-25	0.990962	0.000122172
Lnc_000263	1.40394	1.39e-16	Solyc10g054550.1	2.02978	7.33e-25	0.990962	0.000122172
Lnc_000263	1.40394	1.39e-16	Solyc10g076610.2	1.17537	2.73e-37	0.992841	7.67025e-05
Lnc_000263	1.40394	1.39e-16	Solyc10g079790.1	-1.3422	1.04e-54	-0.990713	0.000128963
Lnc_000263	1.40394	1.39e-16	Solyc10g080210.2	2.38469	2.77e-16	0.995139	3.53814e-05
Lnc_000263	1.40394	1.39e-16	Solyc10g081500.1	1.34467	2.72e-14	0.990644	0.000130889
Lnc_000263	1.40394	1.39e-16	Solyc10g083700.3	-1.64777	1.84e-54	-0.990171	0.000144438
Lnc_000263	1.40394	1.39e-16	Solyc11g007180.2	2.18683	1.06e-75	0.990397	0.000137871
Lnc_000263	1.40394	1.39e-16	Solyc11g010930.2	1.82454	2.19e-37	0.991032	0.000120273
Lnc_000263	1.40394	1.39e-16	Solyc11g017390.2	1.77699	1.25e-10	0.991147	0.000117218
Lnc_000263	1.40394	1.39e-16	Solyc11g064835.1	1.07206	7.43e-08	0.991071	0.000119238
Lnc_000263	1.40394	1.39e-16	Solyc11g066640.1	1.09371	8.35e-11	0.997076	1.28079e-05
Lnc_000263	1.40394	1.39e-16	Solyc11g069070.2	-1.70234	4.52e-45	-0.991583	0.000105981
Lnc_000263	1.40394	1.39e-16	Solyc11g072830.1	2.01132	2.04e-174	0.990318	0.00014015
Lnc_000263	1.40394	1.39e-16	Solyc12g005380.2	2.36931	4.39e-105	0.992221	9.05242e-05
Lnc_000263	1.40394	1.39e-16	Solyc12g007320.1	1.45593	8.59e-35	0.99872	2.45697e-06
Lnc_000263	1.40394	1.39e-16	Solyc12g009850.1	3.3646	8.23e-24	0.997829	7.06292e-06
Lnc_000263	1.40394	1.39e-16	Solyc12g011100.2	1.52519	2.16e-55	0.990442	0.000136595
Lnc_000263	1.40394	1.39e-16	Solyc12g013730.2	-1.31053	1.82e-33	-0.993021	7.28899e-05
Lnc_000263	1.40394	1.39e-16	Solyc12g013733.1	-1.31053	1.82e-33	-0.993021	7.28899e-05
Lnc_000263	1.40394	1.39e-16	Solyc12g013740.2	-1.31053	1.82e-33	-0.993021	7.28899e-05
Lnc_000263	1.40394	1.39e-16	Solyc12g014360.2	-2.0766	1.14e-46	-0.991798	0.000100635
Lnc_000263	1.40394	1.39e-16	Solyc12g019230.2	1.90709	2.11e-23	0.991892	9.83537e-05
Lnc_000263	1.40394	1.39e-16	Solyc12g038800.1	1.56903	1.27e-25	0.994532	4.47694e-05
Lnc_000263	1.40394	1.39e-16	Solyc12g056650.2	1.14707	1.25e-82	0.992009	9.55312e-05
Lnc_000263	1.40394	1.39e-16	Solyc12g088850.1	1.7751	2.54e-08	0.99683	1.50601e-05
Lnc_000263	1.40394	1.39e-16	Solyc12g088930.1	-1.23596	9.5e-12	-0.990061	0.000147672
Lnc_000263	1.40394	1.39e-16	Solyc12g096880.2	-1.25865	1.27e-23	-0.990077	0.000147214
Lnc_000263	1.40394	1.39e-16	Solyc12g096890.1	-1.25865	1.27e-23	-0.990077	0.000147214
Lnc_000263	1.40394	1.39e-16	Solyc12g098900.2	1.6672	1.84e-20	0.991811	0.000100323
Lnc_000263	1.40394	1.39e-16	Solyc12g099200.2	1.1878	4.97e-62	0.99506	3.65454e-05
Lnc_000269	-2.11174	0.00477241	Solyc00g007570.2	-1.38854	0.00940095	0.996072	2.31126e-05
Lnc_000269	-2.11174	0.00477241	Solyc00g013170.1	-2.99598	6.12e-06	0.990874	0.00012455
Lnc_000269	-2.11174	0.00477241	Solyc00g023580.1	-1.7389	0.000622086	0.995524	3.00031e-05
Lnc_000269	-2.11174	0.00477241	Solyc00g023590.2	-1.7389	0.000622086	0.995524	3.00031e-05
Lnc_000269	-2.11174	0.00477241	Solyc00g023600.2	-1.7389	0.000622086	0.995524	3.00031e-05
Lnc_000269	-2.11174	0.00477241	Solyc00g025300.1	-3.04606	0.0461195	0.996758	1.57533e-05
Lnc_000269	-2.11174	0.00477241	Solyc00g047190.1	-2.12127	1.44e-05	0.996911	1.42944e-05
Lnc_000269	-2.11174	0.00477241	Solyc00g052540.1	-1.61643	0.00133026	0.996769	1.56458e-05
Lnc_000269	-2.11174	0.00477241	Solyc00g068970.2	-1.38757	0.000376637	0.99621	2.15177e-05
Lnc_000269	-2.11174	0.00477241	Solyc00g094540.1	-1.13728	0.000131723	0.991212	0.000115493
Lnc_000269	-2.11174	0.00477241	Solyc00g108550.1	-1.23613	0.00560474	0.994514	4.50632e-05
Lnc_000269	-2.11174	0.00477241	Solyc00g164580.1	-1.46565	0.00903672	0.996992	1.35567e-05
Lnc_000269	-2.11174	0.00477241	Solyc00g181250.2	-1.2935	0.000572948	0.998203	4.84333e-06
Lnc_000269	-2.11174	0.00477241	Solyc00g281110.1	-2.15641	2.89e-05	0.99556	2.95265e-05
Lnc_000269	-2.11174	0.00477241	Solyc01g005990.3	-2.00575	0.000716178	0.991915	9.77904e-05
Lnc_000269	-2.11174	0.00477241	Solyc01g066910.3	-1.77955	0.0111404	0.997937	6.37846e-06
Lnc_000269	-2.11174	0.00477241	Solyc01g096940.3	-1.48592	0.00305786	0.99538	3.19689e-05
Lnc_000269	-2.11174	0.00477241	Solyc01g109390.3	-1.42744	0.00853628	0.995577	2.93011e-05
Lnc_000269	-2.11174	0.00477241	Solyc03g007690.1	-1.99353	5.87e-07	0.992714	7.94284e-05
Lnc_000269	-2.11174	0.00477241	Solyc03g019670.3	-1.16371	3.86e-05	0.990227	0.000142811
Lnc_000269	-2.11174	0.00477241	Solyc03g061655.1	-2.11154	0.000104374	0.99799	6.05567e-06
Lnc_000269	-2.11174	0.00477241	Solyc03g121900.1	-4.59619	7.53e-06	0.996251	2.10591e-05
Lnc_000269	-2.11174	0.00477241	Solyc05g010180.3	-1.01244	0.000568443	0.994286	4.88752e-05
Lnc_000269	-2.11174	0.00477241	Solyc05g015658.1	-1.44739	2.69e-05	0.991723	0.00010247
Lnc_000269	-2.11174	0.00477241	Solyc05g015680.2	-1.44739	2.69e-05	0.991723	0.00010247
Lnc_000269	-2.11174	0.00477241	Solyc05g021410.2	-3.04241	0.00246823	0.998198	4.86954e-06
Lnc_000269	-2.11174	0.00477241	Solyc06g005070.2	-1.78612	0.00119446	0.994211	5.01668e-05
Lnc_000269	-2.11174	0.00477241	Solyc06g024210.2	-1.12394	0.00227149	0.99338	6.55945e-05
Lnc_000269	-2.11174	0.00477241	Solyc06g035455.1	-1.99128	0.000437665	0.992258	8.96814e-05
Lnc_000269	-2.11174	0.00477241	Solyc06g035480.3	-1.99128	0.000437665	0.992258	8.96814e-05
Lnc_000269	-2.11174	0.00477241	Solyc06g066750.3	-1.26553	0.00750265	0.995449	3.10189e-05
Lnc_000269	-2.11174	0.00477241	Solyc06g066760.3	-1.26553	0.00750265	0.995449	3.10189e-05
Lnc_000269	-2.11174	0.00477241	Solyc07g007860.1	-1.37229	0.000322839	0.994189	5.05578e-05
Lnc_000269	-2.11174	0.00477241	Solyc07g019500.2	-1.02168	0.00757034	0.996729	1.60351e-05
Lnc_000269	-2.11174	0.00477241	Solyc07g065110.1	-1.72639	0.0187635	0.997973	6.16128e-06
Lnc_000269	-2.11174	0.00477241	Solyc08g061160.2	-1.43946	0.000270054	0.993983	5.4195e-05
Lnc_000269	-2.11174	0.00477241	Solyc08g066365.1	-1.49882	0.00722341	0.995206	3.44129e-05
Lnc_000269	-2.11174	0.00477241	Solyc08g066370.2	-1.49882	0.00722341	0.995206	3.44129e-05
Lnc_000269	-2.11174	0.00477241	Solyc08g068165.1	-1.16495	0.00359169	0.999235	8.77917e-07
Lnc_000269	-2.11174	0.00477241	Solyc08g068170.1	-1.16495	0.00359169	0.999235	8.77917e-07
Lnc_000269	-2.11174	0.00477241	Solyc08g078890.2	-2.60336	0.000280741	0.994133	5.15305e-05
Lnc_000269	-2.11174	0.00477241	Solyc08g078900.1	-2.1788	0.00073895	0.994321	4.8293e-05
Lnc_000269	-2.11174	0.00477241	Solyc08g078940.1	-2.60336	0.000280741	0.994133	5.15305e-05
Lnc_000269	-2.11174	0.00477241	Solyc09g011010.3	-1.00116	0.000739941	0.991509	0.000107842
Lnc_000269	-2.11174	0.00477241	Solyc09g011023.1	-1.00116	0.000739941	0.991509	0.000107842
Lnc_000269	-2.11174	0.00477241	Solyc09g015900.1	-1.58902	9.36e-05	0.998423	3.72961e-06
Lnc_000269	-2.11174	0.00477241	Solyc09g072700.3	-2.78741	0.000228748	0.99499	3.75902e-05
Lnc_000269	-2.11174	0.00477241	Solyc10g047030.3	-1.62734	0.0325773	0.997024	1.32729e-05
Lnc_000269	-2.11174	0.00477241	Solyc10g048060.1	-1.08124	0.000178412	0.992043	9.47177e-05
Lnc_000269	-2.11174	0.00477241	Solyc10g050440.2	-1.00195	0.000273063	0.990312	0.000140345
Lnc_000269	-2.11174	0.00477241	Solyc11g038340.1	-1.50293	0.00660232	0.996196	2.16749e-05
Lnc_000269	-2.11174	0.00477241	Solyc11g038350.1	-1.50293	0.00660232	0.996196	2.16749e-05
Lnc_000269	-2.11174	0.00477241	Solyc11g039350.1	-1.7181	0.0010507	0.995601	2.89789e-05
Lnc_000269	-2.11174	0.00477241	Solyc11g039370.2	-1.45538	0.00152891	0.993689	5.96244e-05
Lnc_000269	-2.11174	0.00477241	Solyc11g039380.1	-1.12467	0.00542913	0.994796	4.05593e-05
Lnc_000269	-2.11174	0.00477241	Solyc11g056280.1	-1.53279	0.0129714	0.996034	2.35598e-05
Lnc_000269	-2.11174	0.00477241	Solyc11g056530.1	-1.12838	0.0011821	0.992081	9.38243e-05
Lnc_000269	-2.11174	0.00477241	Solyc11g056637.1	-1.26858	0.00243683	0.99793	6.42101e-06
Lnc_000269	-2.11174	0.00477241	Solyc11g061700.2	-1.74605	3.17e-12	0.995371	3.20867e-05
Lnc_000269	-2.11174	0.00477241	Solyc11g063570.1	-1.33761	0.00330413	0.995175	3.48624e-05
Lnc_000269	-2.11174	0.00477241	Solyc11g063580.2	-1.19662	8.58e-05	0.993808	5.73868e-05
Lnc_000269	-2.11174	0.00477241	Solyc12g007160.2	-2.07733	0.000207147	0.99151	0.000107811
Lnc_000269	-2.11174	0.00477241	Solyc12g087940.2	-2.16116	0.00833103	0.99789	6.67469e-06
Lnc_000269	-2.11174	0.00477241	Solyc12g088640.2	-2.80595	5.29e-05	0.996861	1.47664e-05
Lnc_000284	-5.60483	0.00126358	Solyc01g009410.3	-1.49866	1.05e-11	0.993007	7.31872e-05
Lnc_000284	-5.60483	0.00126358	Solyc01g067330.3	-1.43138	1.08e-18	0.994353	4.77504e-05
Lnc_000284	-5.60483	0.00126358	Solyc01g067340.2	-1.43138	1.08e-18	0.994353	4.77504e-05
Lnc_000284	-5.60483	0.00126358	Solyc01g067860.3	-2.08921	1.68e-74	0.993839	5.68125e-05
Lnc_000284	-5.60483	0.00126358	Solyc01g090730.3	-1.19024	3.08e-13	0.993213	6.89342e-05
Lnc_000284	-5.60483	0.00126358	Solyc01g107260.3	-2.14717	2.27e-131	0.990776	0.000127218
Lnc_000284	-5.60483	0.00126358	Solyc02g032800.1	-1.12562	6.25e-36	0.996503	1.83212e-05
Lnc_000284	-5.60483	0.00126358	Solyc02g083480.3	-2.06664	4.62e-83	0.99009	0.000146831
Lnc_000284	-5.60483	0.00126358	Solyc02g088190.3	-2.23105	3.99e-98	0.990605	0.000131972
Lnc_000284	-5.60483	0.00126358	Solyc03g006590.3	-1.24296	7.43e-19	0.997647	8.29796e-06
Lnc_000284	-5.60483	0.00126358	Solyc03g120950.3	-2.98798	1.87e-118	0.990425	0.000137078
Lnc_000284	-5.60483	0.00126358	Solyc03g123410.1	-1.05074	8.83e-10	0.994651	4.28477e-05
Lnc_000284	-5.60483	0.00126358	Solyc04g053110.1	-1.512	8.17e-07	0.99025	0.00014212
Lnc_000284	-5.60483	0.00126358	Solyc05g012670.1	-1.06357	1.03e-10	0.997704	7.89855e-06
Lnc_000284	-5.60483	0.00126358	Solyc05g046020.3	-1.58116	2.95e-72	0.991921	9.76318e-05
Lnc_000284	-5.60483	0.00126358	Solyc05g046030.3	-1.58116	2.95e-72	0.991921	9.76318e-05
Lnc_000284	-5.60483	0.00126358	Solyc05g056050.3	-1.23675	4.28e-08	0.991228	0.000115094
Lnc_000284	-5.60483	0.00126358	Solyc06g005300.3	-1.05838	3.58e-12	0.996821	1.51428e-05
Lnc_000284	-5.60483	0.00126358	Solyc07g006590.1	1.0882	8.67e-18	-0.991145	0.000117279
Lnc_000284	-5.60483	0.00126358	Solyc07g053370.1	-1.09785	0.000170345	0.998944	1.67152e-06
Lnc_000284	-5.60483	0.00126358	Solyc08g006630.3	-1.32838	9.41e-15	0.991272	0.000113935
Lnc_000284	-5.60483	0.00126358	Solyc09g007830.3	-1.03549	6.55e-15	0.990424	0.000137099
Lnc_000284	-5.60483	0.00126358	Solyc09g008060.3	-1.20238	1.13e-26	0.993123	7.07741e-05
Lnc_000284	-5.60483	0.00126358	Solyc10g006150.3	-1.52101	5.07e-20	0.993541	6.24414e-05
Lnc_000284	-5.60483	0.00126358	Solyc10g011760.3	-1.29777	1.85e-22	0.991091	0.000118694
Lnc_000284	-5.60483	0.00126358	Solyc10g017500.1	-1.25987	5.14e-27	0.99327	6.77909e-05
Lnc_000284	-5.60483	0.00126358	Solyc10g055240.2	-1.30063	1.3e-24	0.991781	0.000101059
Lnc_000284	-5.60483	0.00126358	Solyc10g061970.2	-1.10983	1.32e-26	0.991411	0.000110341
Lnc_000284	-5.60483	0.00126358	Solyc10g078890.2	-2.06925	4.21e-34	0.996309	2.0415e-05
Lnc_000284	-5.60483	0.00126358	Solyc11g072310.2	-1.95179	3.19e-49	0.996512	1.82266e-05
Lnc_000284	-5.60483	0.00126358	Solyc12g037930.2	-1.79953	1.38e-14	0.991069	0.000119295
Lnc_000298	-1.93408	0.0464499	Solyc01g009410.3	-1.49866	1.05e-11	0.990087	0.000146919
Lnc_000298	-1.93408	0.0464499	Solyc01g067330.3	-1.43138	1.08e-18	0.99227	8.93925e-05
Lnc_000298	-1.93408	0.0464499	Solyc01g067340.2	-1.43138	1.08e-18	0.99227	8.93925e-05
Lnc_000298	-1.93408	0.0464499	Solyc03g006590.3	-1.24296	7.43e-19	0.99183	9.98425e-05
Lnc_000298	-1.93408	0.0464499	Solyc07g053370.1	-1.09785	0.000170345	0.993699	5.94279e-05
Lnc_000299	-5.66836	0.00475573	Solyc00g050430.3	1.25427	0.00798026	-0.994034	5.32897e-05
Lnc_000299	-5.66836	0.00475573	Solyc01g006300.3	-2.53916	3.8e-29	0.992839	7.6742e-05
Lnc_000299	-5.66836	0.00475573	Solyc01g007020.3	-2.86279	5.82e-34	0.990168	0.00014453
Lnc_000299	-5.66836	0.00475573	Solyc01g007025.1	-2.86279	5.82e-34	0.990168	0.00014453
Lnc_000299	-5.66836	0.00475573	Solyc01g007030.3	-2.86279	5.82e-34	0.990168	0.00014453
Lnc_000299	-5.66836	0.00475573	Solyc01g007040.3	-2.86279	5.82e-34	0.990168	0.00014453
Lnc_000299	-5.66836	0.00475573	Solyc01g009160.2	-1.96153	1.75e-31	0.992752	7.86087e-05
Lnc_000299	-5.66836	0.00475573	Solyc01g065530.3	-2.47282	9.31e-47	0.992356	8.74129e-05
Lnc_000299	-5.66836	0.00475573	Solyc01g067440.3	-3.93401	1.69e-38	0.993246	6.82669e-05
Lnc_000299	-5.66836	0.00475573	Solyc01g067460.2	-3.16537	2.93e-15	0.992797	7.76434e-05
Lnc_000299	-5.66836	0.00475573	Solyc01g079530.3	-1.27083	4.95e-14	0.992388	8.66882e-05
Lnc_000299	-5.66836	0.00475573	Solyc01g079740.3	-1.23243	1.38e-08	0.992475	8.47151e-05
Lnc_000299	-5.66836	0.00475573	Solyc01g087140.3	-1.45072	1.35e-14	0.996223	2.13675e-05
Lnc_000299	-5.66836	0.00475573	Solyc01g087740.1	-1.61657	7.56e-21	0.992019	9.52886e-05
Lnc_000299	-5.66836	0.00475573	Solyc01g090790.3	-1.33527	3.93e-11	0.991631	0.000104768
Lnc_000299	-5.66836	0.00475573	Solyc01g094910.3	-1.81201	3.08e-33	0.990796	0.000126685
Lnc_000299	-5.66836	0.00475573	Solyc01g096370.3	-1.44052	7.9e-25	0.990489	0.000135253
Lnc_000299	-5.66836	0.00475573	Solyc01g098400.3	-1.13742	8.24e-19	0.994135	5.14981e-05
Lnc_000299	-5.66836	0.00475573	Solyc01g105300.3	-1.30606	3.94e-18	0.993073	7.18174e-05
Lnc_000299	-5.66836	0.00475573	Solyc01g105650.3	-1.54972	3.78e-15	0.998097	5.42946e-06
Lnc_000299	-5.66836	0.00475573	Solyc01g105870.3	-1.63339	1.56e-28	0.992939	7.4601e-05
Lnc_000299	-5.66836	0.00475573	Solyc01g105880.4	-2.47144	2.49e-39	0.992335	8.79105e-05
Lnc_000299	-5.66836	0.00475573	Solyc01g107430.2	-1.37655	1.01e-20	0.992569	8.26256e-05
Lnc_000299	-5.66836	0.00475573	Solyc01g109250.2	-1.66983	1.03e-19	0.992927	7.48711e-05
Lnc_000299	-5.66836	0.00475573	Solyc01g110800.3	-1.4625	1.25e-10	0.993045	7.23816e-05
Lnc_000299	-5.66836	0.00475573	Solyc01g111145.1	-1.30985	2.87e-29	0.99073	0.000128499
Lnc_000299	-5.66836	0.00475573	Solyc01g111310.3	-1.36049	2.8e-24	0.991647	0.000104368
Lnc_000299	-5.66836	0.00475573	Solyc02g020890.3	-1.41697	8e-25	0.994677	4.24268e-05
Lnc_000299	-5.66836	0.00475573	Solyc02g062190.2	-1.50573	9.07e-13	0.991333	0.000112347
Lnc_000299	-5.66836	0.00475573	Solyc02g062550.3	-1.33486	2.18e-29	0.99295	7.43874e-05
Lnc_000299	-5.66836	0.00475573	Solyc02g062560.3	-1.33486	2.18e-29	0.99295	7.43874e-05
Lnc_000299	-5.66836	0.00475573	Solyc02g062690.3	-1.99452	9.26e-24	0.99114	0.000117403
Lnc_000299	-5.66836	0.00475573	Solyc02g062890.2	-1.13747	7.59e-14	0.990577	0.000132768
Lnc_000299	-5.66836	0.00475573	Solyc02g062900.2	-1.13747	7.59e-14	0.990577	0.000132768
Lnc_000299	-5.66836	0.00475573	Solyc02g065060.3	-1.30206	6.73e-14	0.99611	2.26699e-05
Lnc_000299	-5.66836	0.00475573	Solyc02g065430.1	-1.71962	5.06e-21	0.994693	4.21777e-05
Lnc_000299	-5.66836	0.00475573	Solyc02g067600.1	-1.37889	2.33e-31	0.995438	3.11739e-05
Lnc_000299	-5.66836	0.00475573	Solyc02g067610.1	-1.37889	2.33e-31	0.995438	3.11739e-05
Lnc_000299	-5.66836	0.00475573	Solyc02g070040.1	-1.04147	2.66e-25	0.99197	9.64532e-05
Lnc_000299	-5.66836	0.00475573	Solyc02g070050.3	-1.04147	2.66e-25	0.99197	9.64532e-05
Lnc_000299	-5.66836	0.00475573	Solyc02g072380.1	-1.30261	2.25e-23	0.990083	0.000147029
Lnc_000299	-5.66836	0.00475573	Solyc02g072390.2	-1.30261	2.25e-23	0.990083	0.000147029
Lnc_000299	-5.66836	0.00475573	Solyc02g072393.1	-1.30261	2.25e-23	0.990083	0.000147029
Lnc_000299	-5.66836	0.00475573	Solyc02g077710.1	-1.16522	1.15e-14	0.990699	0.000129365
Lnc_000299	-5.66836	0.00475573	Solyc02g078890.1	-2.2278	1.59e-42	0.992531	8.34667e-05
Lnc_000299	-5.66836	0.00475573	Solyc02g079360.2	-2.29623	1.48e-28	0.992344	8.76948e-05
Lnc_000299	-5.66836	0.00475573	Solyc02g080200.3	-1.62063	2.14e-20	0.990083	0.000147034
Lnc_000299	-5.66836	0.00475573	Solyc02g080210.3	-1.62063	2.14e-20	0.990083	0.000147034
Lnc_000299	-5.66836	0.00475573	Solyc02g082040.3	-1.1861	1.72e-18	0.991938	9.72327e-05
Lnc_000299	-5.66836	0.00475573	Solyc02g085160.1	-1.13227	3.35e-12	0.996994	1.35373e-05
Lnc_000299	-5.66836	0.00475573	Solyc02g086460.3	-2.87236	6.35e-63	0.992838	7.67542e-05
Lnc_000299	-5.66836	0.00475573	Solyc02g087350.2	-1.4856	6.97e-27	0.993228	6.86406e-05
Lnc_000299	-5.66836	0.00475573	Solyc02g090500.3	-2.04453	4.55e-39	0.992261	8.96106e-05
Lnc_000299	-5.66836	0.00475573	Solyc02g090505.1	-2.04453	4.55e-39	0.992261	8.96106e-05
Lnc_000299	-5.66836	0.00475573	Solyc02g091810.2	-2.52273	3.66e-52	0.991095	0.000118607
Lnc_000299	-5.66836	0.00475573	Solyc02g092215.1	-2.29618	7.22e-42	0.991295	0.000113326
Lnc_000299	-5.66836	0.00475573	Solyc03g005020.3	-1.2735	4.86e-13	0.990649	0.000130758
Lnc_000299	-5.66836	0.00475573	Solyc03g005330.1	-1.87602	5.36e-31	0.992242	9.00495e-05
Lnc_000299	-5.66836	0.00475573	Solyc03g006250.2	-1.51668	4.62e-18	0.990296	0.000140786
Lnc_000299	-5.66836	0.00475573	Solyc03g006720.1	-1.23364	6.84e-14	0.995802	2.63994e-05
Lnc_000299	-5.66836	0.00475573	Solyc03g026170.3	-1.0104	1.97e-14	0.995233	3.40344e-05
Lnc_000299	-5.66836	0.00475573	Solyc03g026280.3	-3.91085	1.55e-52	0.993139	7.04424e-05
Lnc_000299	-5.66836	0.00475573	Solyc03g033330.3	1.18843	0.0435894	-0.9903	0.000140686
Lnc_000299	-5.66836	0.00475573	Solyc03g034410.1	-2.225	5.5e-22	0.993754	5.83974e-05
Lnc_000299	-5.66836	0.00475573	Solyc03g036470.2	-1.30444	9.38e-24	0.993707	5.9274e-05
Lnc_000299	-5.66836	0.00475573	Solyc03g036473.1	-1.30444	9.38e-24	0.993707	5.9274e-05
Lnc_000299	-5.66836	0.00475573	Solyc03g036480.2	-1.30444	9.38e-24	0.993707	5.9274e-05
Lnc_000299	-5.66836	0.00475573	Solyc03g045140.3	-2.79486	1.37e-68	0.992216	9.06562e-05
Lnc_000299	-5.66836	0.00475573	Solyc03g045150.1	-2.79486	1.37e-68	0.992216	9.06562e-05
Lnc_000299	-5.66836	0.00475573	Solyc03g062720.3	-1.37744	4.19e-09	0.991618	0.000105101
Lnc_000299	-5.66836	0.00475573	Solyc03g082510.1	-1.30705	1.19e-20	0.992058	9.43608e-05
Lnc_000299	-5.66836	0.00475573	Solyc03g082530.1	-1.09599	2.15e-09	0.993112	7.09966e-05
Lnc_000299	-5.66836	0.00475573	Solyc03g082790.3	-1.59823	1.34e-18	0.993562	6.20298e-05
Lnc_000299	-5.66836	0.00475573	Solyc03g083010.3	-1.09972	5.62e-14	0.990869	0.000124679
Lnc_000299	-5.66836	0.00475573	Solyc03g093080.3	-3.3959	3.06e-73	0.990853	0.000125109
Lnc_000299	-5.66836	0.00475573	Solyc03g093110.3	-3.3959	3.06e-73	0.990853	0.000125109
Lnc_000299	-5.66836	0.00475573	Solyc03g093120.4	-3.3959	3.06e-73	0.990853	0.000125109
Lnc_000299	-5.66836	0.00475573	Solyc03g093130.3	-3.3959	3.06e-73	0.990853	0.000125109
Lnc_000299	-5.66836	0.00475573	Solyc03g098300.1	-3.93176	1.33e-78	0.99128	0.000113717
Lnc_000299	-5.66836	0.00475573	Solyc03g098660.3	-1.16954	2.11e-10	0.993195	6.93105e-05
Lnc_000299	-5.66836	0.00475573	Solyc03g111880.3	-1.32545	1.37e-15	0.992973	7.38977e-05
Lnc_000299	-5.66836	0.00475573	Solyc03g111920.2	-1.05891	1.22e-18	0.990468	0.000135854
Lnc_000299	-5.66836	0.00475573	Solyc03g112700.1	-1.43288	1.04e-19	0.99443	4.64502e-05
Lnc_000299	-5.66836	0.00475573	Solyc03g112930.3	-1.45562	1.09e-21	0.990166	0.000144577
Lnc_000299	-5.66836	0.00475573	Solyc03g114130.1	-1.33344	3.83e-11	0.991461	0.000109057
Lnc_000299	-5.66836	0.00475573	Solyc03g114597.1	-1.39227	1.88e-15	0.993591	6.14796e-05
Lnc_000299	-5.66836	0.00475573	Solyc03g114600.3	-1.39227	1.88e-15	0.993591	6.14796e-05
Lnc_000299	-5.66836	0.00475573	Solyc03g114620.1	-3.61234	1.84e-70	0.993832	5.69492e-05
Lnc_000299	-5.66836	0.00475573	Solyc03g117260.2	-1.38309	1.76e-31	0.991987	9.60607e-05
Lnc_000299	-5.66836	0.00475573	Solyc03g119210.1	-1.7507	5.31e-22	0.992365	8.72179e-05
Lnc_000299	-5.66836	0.00475573	Solyc03g119250.3	-2.33698	2.24e-40	0.992593	8.21017e-05
Lnc_000299	-5.66836	0.00475573	Solyc03g120710.2	-1.03156	4.22e-17	0.992027	9.50899e-05
Lnc_000299	-5.66836	0.00475573	Solyc03g121620.1	-1.09288	1.36e-19	0.992495	8.42814e-05
Lnc_000299	-5.66836	0.00475573	Solyc03g122320.1	-1.64728	1.92e-12	0.998203	4.83961e-06
Lnc_000299	-5.66836	0.00475573	Solyc03g122340.3	-1.73779	3.5e-24	0.993642	6.0503e-05
Lnc_000299	-5.66836	0.00475573	Solyc03g122350.3	-1.06191	2.35e-13	0.99137	0.000111402
Lnc_000299	-5.66836	0.00475573	Solyc03g122360.3	-1.06191	2.35e-13	0.99137	0.000111402
Lnc_000299	-5.66836	0.00475573	Solyc03g124110.2	-3.91085	1.55e-52	0.993139	7.04424e-05
Lnc_000299	-5.66836	0.00475573	Solyc04g007390.3	-1.53938	5.02e-35	0.991071	0.000119246
Lnc_000299	-5.66836	0.00475573	Solyc04g007400.3	-1.53938	5.02e-35	0.991071	0.000119246
Lnc_000299	-5.66836	0.00475573	Solyc04g007750.3	-1.90988	1.02e-27	0.993016	7.29888e-05
Lnc_000299	-5.66836	0.00475573	Solyc04g007760.3	-1.90988	1.02e-27	0.993016	7.29888e-05
Lnc_000299	-5.66836	0.00475573	Solyc04g008930.2	-1.35404	1.91e-08	0.993144	7.03496e-05
Lnc_000299	-5.66836	0.00475573	Solyc04g015820.1	-1.60201	2.94e-19	0.996436	1.90271e-05
Lnc_000299	-5.66836	0.00475573	Solyc04g047760.2	-1.27175	0.00247478	0.996339	2.00779e-05
Lnc_000299	-5.66836	0.00475573	Solyc04g051247.1	-1.23957	3.37e-10	0.992862	7.62465e-05
Lnc_000299	-5.66836	0.00475573	Solyc04g051820.3	-1.50732	8.32e-31	0.990542	0.000133756
Lnc_000299	-5.66836	0.00475573	Solyc04g074420.1	-3.57318	3.78e-103	0.990098	0.000146593
Lnc_000299	-5.66836	0.00475573	Solyc04g074430.1	-3.57318	3.78e-103	0.990098	0.000146593
Lnc_000299	-5.66836	0.00475573	Solyc04g074440.1	-3.57318	3.78e-103	0.990098	0.000146593
Lnc_000299	-5.66836	0.00475573	Solyc04g074450.1	-3.57318	3.78e-103	0.990098	0.000146593
Lnc_000299	-5.66836	0.00475573	Solyc04g074680.1	-1.88368	3.57e-22	0.992712	7.94774e-05
Lnc_000299	-5.66836	0.00475573	Solyc04g074830.1	-2.28152	3.93e-34	0.99116	0.000116873
Lnc_000299	-5.66836	0.00475573	Solyc04g078860.3	-1.30166	5.84e-21	0.995624	2.86833e-05
Lnc_000299	-5.66836	0.00475573	Solyc04g079360.1	-2.49873	5.04e-43	0.992519	8.37448e-05
Lnc_000299	-5.66836	0.00475573	Solyc04g079560.3	-1.24455	1.19e-20	0.996402	1.93938e-05
Lnc_000299	-5.66836	0.00475573	Solyc04g079730.1	-2.67507	1.04e-29	0.990719	0.000128806
Lnc_000299	-5.66836	0.00475573	Solyc04g081300.3	-1.28899	5.12e-24	0.991936	9.72817e-05
Lnc_000299	-5.66836	0.00475573	Solyc04g081560.3	-1.53166	1.25e-24	0.993015	7.30091e-05
Lnc_000299	-5.66836	0.00475573	Solyc05g006220.3	-1.17937	3.99e-15	0.990461	0.00013606
Lnc_000299	-5.66836	0.00475573	Solyc05g007580.1	-1.16577	8.8e-17	0.993905	5.56063e-05
Lnc_000299	-5.66836	0.00475573	Solyc05g012380.3	-1.12089	3.74e-21	0.991329	0.000112454
Lnc_000299	-5.66836	0.00475573	Solyc05g050540.3	-2.75102	6.03e-52	0.991153	0.000117066
Lnc_000299	-5.66836	0.00475573	Solyc05g050550.3	-1.26675	2.05e-11	0.9905	0.000134932
Lnc_000299	-5.66836	0.00475573	Solyc05g052040.1	-2.34373	6.74e-45	0.992182	9.14317e-05
Lnc_000299	-5.66836	0.00475573	Solyc05g052550.1	-1.49306	4.15e-22	0.992917	7.5086e-05
Lnc_000299	-5.66836	0.00475573	Solyc05g052570.3	-1.49306	4.15e-22	0.992917	7.5086e-05
Lnc_000299	-5.66836	0.00475573	Solyc05g052890.3	-2.07511	1.23e-33	0.994276	4.90507e-05
Lnc_000299	-5.66836	0.00475573	Solyc05g054090.3	-1.30414	9.99e-08	0.994797	4.05359e-05
Lnc_000299	-5.66836	0.00475573	Solyc06g005130.3	-1.15771	6.23e-17	0.991814	0.000100237
Lnc_000299	-5.66836	0.00475573	Solyc06g035700.1	-1.40795	1.14e-15	0.995649	2.83533e-05
Lnc_000299	-5.66836	0.00475573	Solyc06g036310.3	-1.64725	6.55e-17	0.991078	0.000119042
Lnc_000299	-5.66836	0.00475573	Solyc06g048410.3	-1.4721	1.88e-28	0.992322	8.82029e-05
Lnc_000299	-5.66836	0.00475573	Solyc06g048420.2	-1.4721	1.88e-28	0.992322	8.82029e-05
Lnc_000299	-5.66836	0.00475573	Solyc06g052060.3	-1.26903	1.59e-14	0.994662	4.26622e-05
Lnc_000299	-5.66836	0.00475573	Solyc06g053640.1	-2.1604	7.05e-53	0.99027	0.000141546
Lnc_000299	-5.66836	0.00475573	Solyc06g054320.1	-2.61565	2.02e-24	0.995519	3.00709e-05
Lnc_000299	-5.66836	0.00475573	Solyc06g054630.2	-2.25844	3.31e-13	0.992482	8.45572e-05
Lnc_000299	-5.66836	0.00475573	Solyc06g060760.3	-1.5093	2.49e-29	0.991189	0.000116098
Lnc_000299	-5.66836	0.00475573	Solyc06g060870.1	-1.56085	1.7e-17	0.995388	3.185e-05
Lnc_000299	-5.66836	0.00475573	Solyc06g061230.3	-2.19972	5.79e-22	0.992019	9.52995e-05
Lnc_000299	-5.66836	0.00475573	Solyc06g071560.3	-1.31145	2.8e-21	0.994737	4.14804e-05
Lnc_000299	-5.66836	0.00475573	Solyc06g071570.3	-1.31145	2.8e-21	0.994737	4.14804e-05
Lnc_000299	-5.66836	0.00475573	Solyc06g072390.3	-2.61361	5.16e-47	0.997777	7.40654e-06
Lnc_000299	-5.66836	0.00475573	Solyc06g072400.2	-2.61361	5.16e-47	0.997777	7.40654e-06
Lnc_000299	-5.66836	0.00475573	Solyc06g072403.1	-2.61361	5.16e-47	0.997777	7.40654e-06
Lnc_000299	-5.66836	0.00475573	Solyc06g072407.1	-2.61361	5.16e-47	0.997777	7.40654e-06
Lnc_000299	-5.66836	0.00475573	Solyc06g074030.1	-2.51657	3.47e-42	0.993079	7.16911e-05
Lnc_000299	-5.66836	0.00475573	Solyc06g075690.3	-2.40728	9.57e-50	0.992036	9.48807e-05
Lnc_000299	-5.66836	0.00475573	Solyc06g082780.3	-1.36186	2.27e-23	0.995239	3.39514e-05
Lnc_000299	-5.66836	0.00475573	Solyc06g083160.1	-1.35347	3.59e-13	0.993225	6.86878e-05
Lnc_000299	-5.66836	0.00475573	Solyc07g006570.3	-1.58562	5.97e-25	0.993394	6.53221e-05
Lnc_000299	-5.66836	0.00475573	Solyc07g006630.3	-1.15343	4.15e-17	0.993274	6.76992e-05
Lnc_000299	-5.66836	0.00475573	Solyc07g006890.1	-1.60639	1.34e-18	0.993045	7.23968e-05
Lnc_000299	-5.66836	0.00475573	Solyc07g007260.3	-1.14684	0.000181248	0.996409	1.93204e-05
Lnc_000299	-5.66836	0.00475573	Solyc07g008560.3	-1.0411	5.47e-19	0.995325	3.27272e-05
Lnc_000299	-5.66836	0.00475573	Solyc07g008570.3	-1.0411	5.47e-19	0.995325	3.27272e-05
Lnc_000299	-5.66836	0.00475573	Solyc07g025500.2	-1.49417	1.03e-15	0.993965	5.45292e-05
Lnc_000299	-5.66836	0.00475573	Solyc07g040960.1	-2.38748	1.35e-50	0.992065	9.42045e-05
Lnc_000299	-5.66836	0.00475573	Solyc07g042520.3	-2.93768	2.24e-41	0.992305	8.86012e-05
Lnc_000299	-5.66836	0.00475573	Solyc07g043700.2	-2.35312	8.24e-36	0.992007	9.55687e-05
Lnc_000299	-5.66836	0.00475573	Solyc07g051820.3	-1.70395	3.06e-24	0.998486	3.43494e-06
Lnc_000299	-5.66836	0.00475573	Solyc07g053540.1	-1.3357	3.81e-18	0.991759	0.000101586
Lnc_000299	-5.66836	0.00475573	Solyc07g055270.1	-1.18018	1.75e-19	0.992453	8.52271e-05
Lnc_000299	-5.66836	0.00475573	Solyc07g056000.2	-2.46631	6.78e-35	0.99338	6.55885e-05
Lnc_000299	-5.66836	0.00475573	Solyc07g065880.3	-2.14183	1.5e-47	0.990897	0.000123928
Lnc_000299	-5.66836	0.00475573	Solyc08g005050.3	-1.61333	1.3e-28	0.990373	0.000138571
Lnc_000299	-5.66836	0.00475573	Solyc08g007700.1	-1.11648	1.82e-10	0.992202	9.09824e-05
Lnc_000299	-5.66836	0.00475573	Solyc08g014000.3	-1.85597	1.23e-32	0.992735	7.89865e-05
Lnc_000299	-5.66836	0.00475573	Solyc08g015640.1	-1.68825	1.74e-32	0.991644	0.000104448
Lnc_000299	-5.66836	0.00475573	Solyc08g016150.1	-2.42631	6.27e-33	0.992622	8.14443e-05
Lnc_000299	-5.66836	0.00475573	Solyc08g036640.3	-4.47879	6.88e-91	0.993288	6.74163e-05
Lnc_000299	-5.66836	0.00475573	Solyc08g066360.3	-1.77493	1.2e-29	0.994191	5.05249e-05
Lnc_000299	-5.66836	0.00475573	Solyc08g067320.2	-1.30487	2.51e-13	0.998205	4.82911e-06
Lnc_000299	-5.66836	0.00475573	Solyc08g067330.1	-1.30487	2.51e-13	0.998205	4.82911e-06
Lnc_000299	-5.66836	0.00475573	Solyc08g068630.3	-2.83226	8.04e-34	0.990812	0.000126235
Lnc_000299	-5.66836	0.00475573	Solyc08g068640.4	-1.729	5.77e-20	0.994281	4.89619e-05
Lnc_000299	-5.66836	0.00475573	Solyc08g068680.3	-1.75666	1.93e-20	0.993284	6.75009e-05
Lnc_000299	-5.66836	0.00475573	Solyc08g074620.3	-1.46667	3.15e-14	0.996736	1.59672e-05
Lnc_000299	-5.66836	0.00475573	Solyc08g074630.2	-1.46667	3.15e-14	0.996736	1.59672e-05
Lnc_000299	-5.66836	0.00475573	Solyc08g074640.1	-1.46667	3.15e-14	0.996736	1.59672e-05
Lnc_000299	-5.66836	0.00475573	Solyc08g076960.1	-1.33399	3.59e-21	0.992799	7.75963e-05
Lnc_000299	-5.66836	0.00475573	Solyc08g076980.3	-1.7081	2.81e-25	0.994967	3.79366e-05
Lnc_000299	-5.66836	0.00475573	Solyc08g078090.1	-2.20879	2.2e-37	0.991331	0.000112414
Lnc_000299	-5.66836	0.00475573	Solyc08g079140.1	-1.67096	4.57e-08	0.994602	4.36249e-05
Lnc_000299	-5.66836	0.00475573	Solyc08g080060.3	-2.12887	1.44e-17	0.995885	2.53604e-05
Lnc_000299	-5.66836	0.00475573	Solyc08g080290.3	-1.53009	3.12e-20	0.99673	1.60254e-05
Lnc_000299	-5.66836	0.00475573	Solyc08g080890.3	-1.03057	5.3e-19	0.993478	6.36596e-05
Lnc_000299	-5.66836	0.00475573	Solyc09g007360.3	-1.54774	1.88e-28	0.991419	0.000110124
Lnc_000299	-5.66836	0.00475573	Solyc09g056450.3	-1.34646	9.73e-17	0.992439	8.55355e-05
Lnc_000299	-5.66836	0.00475573	Solyc09g082810.3	-1.86892	1.08e-27	0.991636	0.000104651
Lnc_000299	-5.66836	0.00475573	Solyc09g083290.3	-1.30812	5.96e-15	0.994673	4.24827e-05
Lnc_000299	-5.66836	0.00475573	Solyc09g083360.3	-1.82022	1.58e-38	0.996702	1.63021e-05
Lnc_000299	-5.66836	0.00475573	Solyc09g091550.3	-2.08065	2.45e-29	0.995917	2.49764e-05
Lnc_000299	-5.66836	0.00475573	Solyc09g092470.2	-1.22946	1.21e-17	0.994082	5.24285e-05
Lnc_000299	-5.66836	0.00475573	Solyc09g098540.3	-1.07313	4.97e-15	0.993569	6.18987e-05
Lnc_000299	-5.66836	0.00475573	Solyc10g008400.1	-1.00741	6.52e-16	0.991911	9.78742e-05
Lnc_000299	-5.66836	0.00475573	Solyc10g009270.3	-1.47515	2.22e-19	0.991302	0.00011315
Lnc_000299	-5.66836	0.00475573	Solyc10g009340.1	-1.23578	3.23e-13	0.994256	4.9394e-05
Lnc_000299	-5.66836	0.00475573	Solyc10g017510.3	-3.3226	4.26e-70	0.993661	6.01403e-05
Lnc_000299	-5.66836	0.00475573	Solyc10g050060.2	-1.14218	2.75e-18	0.99258	8.23747e-05
Lnc_000299	-5.66836	0.00475573	Solyc10g076410.1	-1.14589	1.44e-12	0.99468	4.23824e-05
Lnc_000299	-5.66836	0.00475573	Solyc10g076820.2	-2.1962	4.51e-25	0.991743	0.000101985
Lnc_000299	-5.66836	0.00475573	Solyc10g078530.2	-1.19135	3.17e-21	0.994218	5.00542e-05
Lnc_000299	-5.66836	0.00475573	Solyc10g080920.2	-2.15499	6.27e-37	0.997002	1.34708e-05
Lnc_000299	-5.66836	0.00475573	Solyc10g083300.2	-1.01179	8.32e-19	0.993145	7.03223e-05
Lnc_000299	-5.66836	0.00475573	Solyc10g083560.1	-1.48523	5.28e-10	0.995074	3.63368e-05
Lnc_000299	-5.66836	0.00475573	Solyc10g084380.1	-1.15234	9.49e-12	0.993773	5.80486e-05
Lnc_000299	-5.66836	0.00475573	Solyc11g007210.2	-1.00638	8.95e-11	0.99342	6.47964e-05
Lnc_000299	-5.66836	0.00475573	Solyc11g007220.2	-1.00638	8.95e-11	0.99342	6.47964e-05
Lnc_000299	-5.66836	0.00475573	Solyc11g010250.1	-1.35525	5.19e-21	0.993115	7.09354e-05
Lnc_000299	-5.66836	0.00475573	Solyc11g010500.1	-1.44418	2.6e-18	0.991888	9.84454e-05
Lnc_000299	-5.66836	0.00475573	Solyc11g013270.2	-1.1793	4.62e-16	0.995081	3.62331e-05
Lnc_000299	-5.66836	0.00475573	Solyc11g020990.2	-1.97542	7.31e-44	0.991298	0.000113264
Lnc_000299	-5.66836	0.00475573	Solyc11g030730.2	-1.25324	1.12e-12	0.994149	5.12496e-05
Lnc_000299	-5.66836	0.00475573	Solyc11g042820.2	-1.09322	5.26e-15	0.995305	3.30086e-05
Lnc_000299	-5.66836	0.00475573	Solyc11g045520.2	-2.07016	2.66e-40	0.992803	7.75097e-05
Lnc_000299	-5.66836	0.00475573	Solyc11g071740.2	-1.80711	1.29e-34	0.992276	8.92498e-05
Lnc_000299	-5.66836	0.00475573	Solyc11g071750.2	-1.80711	1.29e-34	0.992276	8.92498e-05
Lnc_000299	-5.66836	0.00475573	Solyc11g071760.3	-1.80711	1.29e-34	0.992276	8.92498e-05
Lnc_000299	-5.66836	0.00475573	Solyc12g005310.2	-2.53564	2.39e-27	0.992093	9.35369e-05
Lnc_000299	-5.66836	0.00475573	Solyc12g009000.1	-2.90107	1.38e-50	0.993113	7.09729e-05
Lnc_000299	-5.66836	0.00475573	Solyc12g009220.2	-3.28308	6.19e-51	0.99324	6.83917e-05
Lnc_000299	-5.66836	0.00475573	Solyc12g010540.1	-1.84666	5.67e-23	0.992226	9.04108e-05
Lnc_000299	-5.66836	0.00475573	Solyc12g017870.2	-1.39393	3.72e-17	0.99084	0.000125484
Lnc_000299	-5.66836	0.00475573	Solyc12g040640.2	-2.83693	7.65e-64	0.990914	0.000123458
Lnc_000299	-5.66836	0.00475573	Solyc12g042580.2	-1.46502	3.13e-17	0.995041	3.68287e-05
Lnc_000299	-5.66836	0.00475573	Solyc12g044330.2	-2.64504	2.78e-59	0.992171	9.171e-05
Lnc_000299	-5.66836	0.00475573	Solyc12g044950.2	-1.35935	1.08e-21	0.991798	0.00010063
Lnc_000299	-5.66836	0.00475573	Solyc12g049320.2	-2.38683	1.83e-49	0.992621	8.14633e-05
Lnc_000299	-5.66836	0.00475573	Solyc12g098620.2	-1.04133	4.84e-15	0.99374	5.86587e-05
Lnc_000303	-2.15834	0.010052	Solyc00g007570.2	-1.38854	0.00940095	0.997914	6.52078e-06
Lnc_000303	-2.15834	0.010052	Solyc00g013170.1	-2.99598	6.12e-06	0.991668	0.000103847
Lnc_000303	-2.15834	0.010052	Solyc00g023580.1	-1.7389	0.000622086	0.997718	7.80592e-06
Lnc_000303	-2.15834	0.010052	Solyc00g023590.2	-1.7389	0.000622086	0.997718	7.80592e-06
Lnc_000303	-2.15834	0.010052	Solyc00g023600.2	-1.7389	0.000622086	0.997718	7.80592e-06
Lnc_000303	-2.15834	0.010052	Solyc00g023700.2	-1.02503	2.44e-05	0.991509	0.000107851
Lnc_000303	-2.15834	0.010052	Solyc00g025300.1	-3.04606	0.0461195	0.996354	1.99124e-05
Lnc_000303	-2.15834	0.010052	Solyc00g047190.1	-2.12127	1.44e-05	0.997923	6.46373e-06
Lnc_000303	-2.15834	0.010052	Solyc00g049220.1	-1.18811	1.09e-05	0.993956	5.46882e-05
Lnc_000303	-2.15834	0.010052	Solyc00g052540.1	-1.61643	0.00133026	0.997265	1.12098e-05
Lnc_000303	-2.15834	0.010052	Solyc00g068970.2	-1.38757	0.000376637	0.994626	4.32493e-05
Lnc_000303	-2.15834	0.010052	Solyc00g094540.1	-1.13728	0.000131723	0.991558	0.000106598
Lnc_000303	-2.15834	0.010052	Solyc00g108550.1	-1.23613	0.00560474	0.996189	2.17635e-05
Lnc_000303	-2.15834	0.010052	Solyc00g164580.1	-1.46565	0.00903672	0.996057	2.32897e-05
Lnc_000303	-2.15834	0.010052	Solyc00g181250.2	-1.2935	0.000572948	0.996333	2.01443e-05
Lnc_000303	-2.15834	0.010052	Solyc00g230060.2	-1.17002	0.0181582	0.993917	5.54007e-05
Lnc_000303	-2.15834	0.010052	Solyc00g281110.1	-2.15641	2.89e-05	0.996569	1.76335e-05
Lnc_000303	-2.15834	0.010052	Solyc01g005990.3	-2.00575	0.000716178	0.995786	2.65999e-05
Lnc_000303	-2.15834	0.010052	Solyc01g066910.3	-1.77955	0.0111404	0.99732	1.07669e-05
Lnc_000303	-2.15834	0.010052	Solyc01g096940.3	-1.48592	0.00305786	0.997941	6.35361e-06
Lnc_000303	-2.15834	0.010052	Solyc01g109390.3	-1.42744	0.00853628	0.998334	4.15916e-06
Lnc_000303	-2.15834	0.010052	Solyc02g069910.2	-1.46357	5.13e-06	0.992833	7.68579e-05
Lnc_000303	-2.15834	0.010052	Solyc02g094330.3	-1.78293	1.62e-05	0.990311	0.000140348
Lnc_000303	-2.15834	0.010052	Solyc03g007690.1	-1.99353	5.87e-07	0.995622	2.87048e-05
Lnc_000303	-2.15834	0.010052	Solyc03g019670.3	-1.16371	3.86e-05	0.994471	4.57766e-05
Lnc_000303	-2.15834	0.010052	Solyc03g061655.1	-2.11154	0.000104374	0.998126	5.2642e-06
Lnc_000303	-2.15834	0.010052	Solyc03g117690.3	-1.71706	6.34e-07	0.991242	0.000114724
Lnc_000303	-2.15834	0.010052	Solyc03g119310.3	-1.12146	3.15e-07	0.994093	5.22426e-05
Lnc_000303	-2.15834	0.010052	Solyc03g121900.1	-4.59619	7.53e-06	0.997828	7.07298e-06
Lnc_000303	-2.15834	0.010052	Solyc04g009590.3	-1.19425	0.000330588	0.995608	2.8893e-05
Lnc_000303	-2.15834	0.010052	Solyc04g074810.3	-1.55567	8.19e-07	0.992108	9.31703e-05
Lnc_000303	-2.15834	0.010052	Solyc05g009040.3	-1.49622	9.14e-07	0.993172	6.97638e-05
Lnc_000303	-2.15834	0.010052	Solyc05g010180.3	-1.01244	0.000568443	0.99489	3.90983e-05
Lnc_000303	-2.15834	0.010052	Solyc05g012600.3	-1.0515	0.000944289	0.991909	9.79342e-05
Lnc_000303	-2.15834	0.010052	Solyc05g015658.1	-1.44739	2.69e-05	0.995765	2.68623e-05
Lnc_000303	-2.15834	0.010052	Solyc05g015680.2	-1.44739	2.69e-05	0.995765	2.68623e-05
Lnc_000303	-2.15834	0.010052	Solyc05g021410.2	-3.04241	0.00246823	0.996597	1.73477e-05
Lnc_000303	-2.15834	0.010052	Solyc06g005070.2	-1.78612	0.00119446	0.996378	1.96551e-05
Lnc_000303	-2.15834	0.010052	Solyc06g024210.2	-1.12394	0.00227149	0.995133	3.54723e-05
Lnc_000303	-2.15834	0.010052	Solyc06g035455.1	-1.99128	0.000437665	0.994667	4.25834e-05
Lnc_000303	-2.15834	0.010052	Solyc06g035480.3	-1.99128	0.000437665	0.994667	4.25834e-05
Lnc_000303	-2.15834	0.010052	Solyc06g066750.3	-1.26553	0.00750265	0.997239	1.14242e-05
Lnc_000303	-2.15834	0.010052	Solyc06g066760.3	-1.26553	0.00750265	0.997239	1.14242e-05
Lnc_000303	-2.15834	0.010052	Solyc06g068550.3	-2.42329	4.06e-12	0.993279	6.76154e-05
Lnc_000303	-2.15834	0.010052	Solyc07g007860.1	-1.37229	0.000322839	0.99729	1.10053e-05
Lnc_000303	-2.15834	0.010052	Solyc07g018383.1	-1.79963	1.55e-05	0.991143	0.000117329
Lnc_000303	-2.15834	0.010052	Solyc07g019500.2	-1.02168	0.00757034	0.991875	9.87579e-05
Lnc_000303	-2.15834	0.010052	Solyc07g065110.1	-1.72639	0.0187635	0.996554	1.77869e-05
Lnc_000303	-2.15834	0.010052	Solyc08g061160.2	-1.43946	0.000270054	0.995551	2.96491e-05
Lnc_000303	-2.15834	0.010052	Solyc08g066365.1	-1.49882	0.00722341	0.999319	6.96253e-07
Lnc_000303	-2.15834	0.010052	Solyc08g066370.2	-1.49882	0.00722341	0.999319	6.96253e-07
Lnc_000303	-2.15834	0.010052	Solyc08g068165.1	-1.16495	0.00359169	0.995719	2.74455e-05
Lnc_000303	-2.15834	0.010052	Solyc08g068170.1	-1.16495	0.00359169	0.995719	2.74455e-05
Lnc_000303	-2.15834	0.010052	Solyc08g078890.2	-2.60336	0.000280741	0.996235	2.12414e-05
[truncated: 18,388 more rows]
