# Supplementary material for: Identification and Characterization of Long Non-coding RNA in Tomato Roots Under Salt Stress
Source: Front Plant Sci. 2022 Jul 4;13:834027. doi: 10.3389/fpls.2022.834027 (PMC9295719; doi:10.3389/fpls.2022.834027)
Supplement: Supplementary Table 8 — KEGG enrichment results of trans-regulated target genes pairs in M82 and S. pennellii. [file Table_8.XLSX]

## Sheet: Table S8-1
Term	Database	ID	Input number	Background number	P-Value	Corrected P-Value
Nitrogen metabolism	KEGG PATHWAY	sly00910	13	34	4.11556e-07	4.15672e-05
Phenylpropanoid biosynthesis	KEGG PATHWAY	sly00940	31	222	6.0377e-06	0.000304904
Metabolic pathways	KEGG PATHWAY	sly01100	174	2483	0.000336391	0.0113252
Plant-pathogen interaction	KEGG PATHWAY	sly04626	23	189	0.000545669	0.0137781
Biosynthesis of secondary metabolites	KEGG PATHWAY	sly01110	92	1252	0.00251504	0.0508039
Base excision repair	KEGG PATHWAY	sly03410	8	42	0.00354802	0.059725
Amino sugar and nucleotide sugar metabolism	KEGG PATHWAY	sly00520	15	134	0.00924362	0.133372
Plant hormone signal transduction	KEGG PATHWAY	sly04075	25	300	0.0273527	0.27939
Pyrimidine metabolism	KEGG PATHWAY	sly00240	8	63	0.0276623	0.27939
beta-Alanine metabolism	KEGG PATHWAY	sly00410	8	63	0.0276623	0.27939
Arginine and proline metabolism	KEGG PATHWAY	sly00330	8	66	0.0343486	0.314572
Stilbenoid, diarylheptanoid and gingerol biosynthesis	KEGG PATHWAY	sly00945	6	43	0.0373749	0.314572
Zeatin biosynthesis	KEGG PATHWAY	sly00908	8	69	0.0420519	0.32455
Taurine and hypotaurine metabolism	KEGG PATHWAY	sly00430	3	13	0.0449871	0.32455

## Sheet: Table S8-2
Term	Database	ID	Input number	Background number	P-Value	Corrected P-Value
Photosynthesis - antenna proteins	KEGG PATHWAY	sly00196	23	26	1.41626e-16	1.47291e-14
Metabolic pathways	KEGG PATHWAY	sly01100	240	2483	1.09419e-13	5.68981e-12
Biosynthesis of secondary metabolites	KEGG PATHWAY	sly01110	143	1252	4.72447e-13	1.63782e-11
Phenylpropanoid biosynthesis	KEGG PATHWAY	sly00940	37	222	1.12568e-07	2.92677e-06
Photosynthesis	KEGG PATHWAY	sly00195	19	84	3.18972e-06	6.63462e-05
Plant hormone signal transduction	KEGG PATHWAY	sly04075	40	300	5.63464e-06	9.76672e-05
Mismatch repair	KEGG PATHWAY	sly03430	12	40	1.99232e-05	0.000296003
Carbon fixation in photosynthetic organisms	KEGG PATHWAY	sly00710	15	80	0.00021176	0.00275288
MAPK signaling pathway - plant	KEGG PATHWAY	sly04016	22	185	0.00250592	0.0289573
Starch and sucrose metabolism	KEGG PATHWAY	sly00500	18	147	0.00448222	0.0451351
DNA replication	KEGG PATHWAY	sly03030	9	50	0.0047739	0.0451351
Cutin, suberine and wax biosynthesis	KEGG PATHWAY	sly00073	7	33	0.00574016	0.0497481
Carbon metabolism	KEGG PATHWAY	sly01200	28	283	0.0076803	0.0588541
Fatty acid elongation	KEGG PATHWAY	sly00062	7	36	0.00859875	0.0588541
Glyoxylate and dicarboxylate metabolism	KEGG PATHWAY	sly00630	11	77	0.00894231	0.0588541
Flavonoid biosynthesis	KEGG PATHWAY	sly00941	9	56	0.00905447	0.0588541
Carotenoid biosynthesis	KEGG PATHWAY	sly00906	7	38	0.0110104	0.0673577
Amino sugar and nucleotide sugar metabolism	KEGG PATHWAY	sly00520	15	134	0.0177965	0.102824
Monoterpenoid biosynthesis	KEGG PATHWAY	sly00902	4	17	0.0259479	0.142031
Steroid biosynthesis	KEGG PATHWAY	sly00100	6	38	0.0326583	0.169823
Glycolysis / Gluconeogenesis	KEGG PATHWAY	sly00010	14	135	0.0360795	0.172169
Porphyrin and chlorophyll metabolism	KEGG PATHWAY	sly00860	7	50	0.0364203	0.172169
Pyrimidine metabolism	KEGG PATHWAY	sly00240	8	63	0.0411544	0.18609
